# Supplementary material for: Facilitating Screening and Brief Interventions in Primary Care: A Systematic Review and Meta‐Analysis of the AUDIT as an Indicator of Alcohol Use Disorders
Source: PubMed Central journal article supplement — Alcohol Clin Exp Res. 2019 Aug 23;43(10):2028–37. doi: 10.1111/acer.14171 (PMC6852009; doi:10.1111/acer.14171), 2019-08-23
Supplement: ACER-43-2028-s001.pdf [file ACER-43-2028-s001.pdf]

SUPPLEMENTARY MATERIAL

Facilitating screening and brief interventions in primary care: a systematic review and meta-analysis of the AUDIT as an indicator of alcohol use disorders

*Shannon Lange, Kevin Shield, Maristela Monteiro, & Jürgen Rehm*

TABLE OF CONTENTS

eTable 1. Identified studies that validated the AUDIT for identifying alcohol use disorders and alcohol dependence among males.....2

eTable 2. Identified studies that validated the AUDIT for identifying alcohol use disorders and alcohol dependence among females.....8

eTable 3. Risk of bias and applicability assessments of the identified studies that validated the AUDIT for identifying alcohol use disorders and alcohol dependence..... 13

eTable 4. Heterogeneity estimates for the sensitivity and specificity of the Alcohol Use Disorder Identification Test in identifying alcohol use disorders and alcohol dependence .14

eTable 5. Screening statistics for alcohol use disorders using an AUDIT cut-point which provides specificities of 0.90, 0.95, and 0.98 by country and sex ..... 15

eTable 6. Screening statistics for alcohol dependence using an AUDIT cut-point which provides specificities of 0.90, 0.95, and 0.98 by country and sex ..... 68

eTable 7. Statistical models for estimating the sensitivity and specificity of the AUDIT as a screening instrument for alcohol use disorders and alcohol dependence ..... 140

eFigure 1. Relationship between the AUDIT cut-point and the sensitivity and specificity of the AUDIT in identifying alcohol dependence by sex, assuming a standard drink size of 10 grams ..... 141

eFigure 2. Funnel plots for Freeman-Tukey Double arcsine transformed sensitivity and specificity estimates for the AUDIT in identifying alcohol use disorders ..... 142

eFigure 3. Funnel plots for Freeman-Tukey Double arcsine transformed sensitivity and specificity estimates for the AUDIT in identifying alcohol dependence..... 143

eFigure 4. Screening statistics by country for alcohol dependence per 1,000 men screened using the AUDIT cut-point that provides a specificity of 0.95 ..... 144

eFigure 5. Screening statistics by country for alcohol dependence per 1,000 women screened using the AUDIT cut-point that provides a specificity of 0.95..... 145

**eTable 1. Identified studies that validated the AUDIT for identifying alcohol use disorders and alcohol dependence among males**

| Reference                            | Study year | Country       | Setting          | Population                                             | Sample size | Number of cases | Tool used to ascertain AUD | Diagnostic criteria used to establish AUD | Cutpoint | Sensitivity | Specificity |
|--------------------------------------|------------|---------------|------------------|--------------------------------------------------------|-------------|-----------------|----------------------------|-------------------------------------------|----------|-------------|-------------|
| <b>Alcohol use disorders</b>         |            |               |                  |                                                        |             |                 |                            |                                           |          |             |             |
| Aertgeerts et al., 2001 <sup>1</sup> | n/a        | Belgium       | Primary care     | General practice patients                              | 971         | 133             | CIDI                       | DSM-III                                   | 5        | 0.826       | 0.729       |
|                                      |            |               |                  |                                                        |             |                 |                            |                                           | 6        | 0.742       | 0.814       |
|                                      |            |               |                  |                                                        |             |                 |                            |                                           | 7        | 0.674       | 0.857       |
| Aertgeerts et al., 2002 <sup>2</sup> | n/a        | Belgium       | Specialized care | Adult inpatients                                       | 233         | 29              | CIDI                       | DSM-III                                   | 8        | 0.606       | 0.903       |
|                                      |            |               |                  |                                                        |             |                 |                            |                                           | 5        | 0.828       | 0.853       |
|                                      |            |               |                  |                                                        |             |                 |                            |                                           | 6        | 0.724       | 0.902       |
| Bergman et al., 1998 <sup>3</sup>    | 1995       | Sweden        | Specialized care | Patients with acute psychiatric problems               | 51          | 35              | Psychiatric opinion        | DSM-III                                   | 7        | 0.690       | 0.926       |
|                                      |            |               |                  |                                                        |             |                 |                            |                                           | 8        | 0.655       | 0.956       |
|                                      |            |               |                  |                                                        |             |                 |                            |                                           | 8        | 0.970       | 0.690       |
|                                      |            |               |                  |                                                        |             |                 |                            |                                           | 9        | 0.970       | 0.690       |
|                                      |            |               |                  |                                                        |             |                 |                            |                                           | 10       | 0.970       | 0.750       |
|                                      |            |               |                  |                                                        |             |                 |                            |                                           | 11       | 0.970       | 0.810       |
|                                      |            |               |                  |                                                        |             |                 |                            |                                           | 12       | 0.970       | 0.810       |
|                                      |            |               |                  |                                                        |             |                 |                            |                                           | 13       | 0.970       | 0.880       |
|                                      |            |               |                  |                                                        |             |                 |                            |                                           | 14       | 0.940       | 0.880       |
|                                      |            |               |                  |                                                        |             |                 |                            |                                           | 15       | 0.940       | 0.940       |
| Boschloo et al., 2010 <sup>4</sup>   | n/a        | Netherlands   | Mixed            | Individuals without depressive and/or anxiety disorder | 467         | 33              | CIDI                       | DSM-IV                                    | 16       | 0.910       | 0.940       |
|                                      |            |               |                  |                                                        |             |                 |                            |                                           | 17       | 0.910       | 0.940       |
|                                      |            |               |                  |                                                        |             |                 |                            |                                           | 18       | 0.880       | 0.940       |
|                                      |            |               |                  |                                                        |             |                 |                            |                                           | 19       | 0.770       | 0.940       |
|                                      |            |               |                  |                                                        |             |                 |                            |                                           | 5        | 0.906       | 0.410       |
|                                      |            |               |                  |                                                        |             |                 |                            |                                           | 6        | 0.769       | 0.570       |
|                                      |            |               |                  | Individuals without depressive and/or anxiety disorder | 1,038       | 108             | CIDI                       | DSM-IV                                    | 7        | 0.682       | 0.660       |
|                                      |            |               |                  |                                                        |             |                 |                            |                                           | 8        | 0.609       | 0.750       |
|                                      |            |               |                  |                                                        |             |                 |                            |                                           | 9        | 0.517       | 0.820       |
|                                      |            |               |                  |                                                        |             |                 |                            |                                           | 10       | 0.345       | 0.850       |
|                                      |            |               |                  |                                                        |             |                 |                            |                                           | 11       | 0.345       | 0.900       |
|                                      |            |               |                  |                                                        |             |                 |                            |                                           | 12       | 0.223       | 0.930       |
| Bradley et al., 1998 <sup>5</sup>    | 1994       | United States | Primary care     | Veterans                                               | 261         | 56              | DIS                        | DSM-III                                   | 5        | 0.918       | 0.520       |
|                                      |            |               |                  |                                                        |             |                 |                            |                                           | 6        | 0.879       | 0.620       |
|                                      |            |               |                  |                                                        |             |                 |                            |                                           | 7        | 0.851       | 0.700       |
|                                      |            |               |                  |                                                        |             |                 |                            |                                           | 8        | 0.795       | 0.760       |
|                                      |            |               |                  |                                                        |             |                 |                            |                                           | 9        | 0.795       | 0.810       |
|                                      |            |               |                  |                                                        |             |                 |                            |                                           | 10       | 0.754       | 0.830       |
|                                      |            |               |                  |                                                        |             |                 |                            |                                           | 11       | 0.686       | 0.860       |
|                                      |            |               |                  |                                                        |             |                 |                            |                                           | 12       | 0.598       | 0.890       |
|                                      |            |               |                  |                                                        |             |                 |                            |                                           | 4        | 0.790       | 0.540       |
|                                      |            |               |                  |                                                        |             |                 |                            |                                           | 5        | 0.750       | 0.690       |
| Bradley et al., 2007 <sup>6</sup>    | 1993-94    | United States | Primary care     | Patients of an academic family practice clinic         | 392         | 66              | AUDADIS                    | DSM-IV                                    | 6        | 0.700       | 0.780       |
|                                      |            |               |                  |                                                        |             |                 |                            |                                           | 7        | 0.660       | 0.830       |
|                                      |            |               |                  |                                                        |             |                 |                            |                                           | 8        | 0.660       | 0.860       |
|                                      |            |               |                  |                                                        |             |                 |                            |                                           | 9        | 0.610       | 0.890       |
| 2                                    | 1.000      | 0.440         |                  |                                                        |             |                 |                            |                                           |          |             |             |
| 3                                    | 0.980      | 0.590         |                  |                                                        |             |                 |                            |                                           |          |             |             |
| 4                                    | 0.940      | 0.670         |                  |                                                        |             |                 |                            |                                           |          |             |             |

| Reference                                                                     | Study year | Country                | Setting          | Population                                          | Sample size | Number of cases | Tool used to ascertain AUD | Diagnostic criteria used to establish AUD | Cutpoint                            | Sensitivity | Specificity |       |                                                               |     |    |      |        |    |       |       |
|-------------------------------------------------------------------------------|------------|------------------------|------------------|-----------------------------------------------------|-------------|-----------------|----------------------------|-------------------------------------------|-------------------------------------|-------------|-------------|-------|---------------------------------------------------------------|-----|----|------|--------|----|-------|-------|
| Chang et al., 2016 <sup>7</sup>                                               | 2014-15    | South Korea            | Specialized care | Patients who underwent a comprehensive medical exam | 266         | 120             | Psychiatric opinion        | DSM-5                                     | 5                                   | 0.890       | 0.780       |       |                                                               |     |    |      |        |    |       |       |
|                                                                               |            |                        |                  |                                                     |             |                 |                            |                                           | 6                                   | 0.820       | 0.830       |       |                                                               |     |    |      |        |    |       |       |
|                                                                               |            |                        |                  |                                                     |             |                 |                            |                                           | 7                                   | 0.790       | 0.870       |       |                                                               |     |    |      |        |    |       |       |
|                                                                               |            |                        |                  |                                                     |             |                 |                            |                                           | 8                                   | 0.680       | 0.880       |       |                                                               |     |    |      |        |    |       |       |
|                                                                               |            |                        |                  |                                                     |             |                 |                            |                                           | 8                                   | 0.879       | 0.733       |       |                                                               |     |    |      |        |    |       |       |
|                                                                               |            |                        |                  |                                                     |             |                 |                            |                                           | 9                                   | 0.819       | 0.813       |       |                                                               |     |    |      |        |    |       |       |
| Cherpitel, 1995 <sup>8</sup>                                                  | 1992       | United States          | Specialized care | Emergency room patients                             | 364         | 184             | CIDI                       | ICD-10                                    | 7                                   | 0.929       | 0.735       |       |                                                               |     |    |      |        |    |       |       |
|                                                                               |            |                        |                  |                                                     |             |                 |                            |                                           | 8                                   | 0.919       | 0.785       |       |                                                               |     |    |      |        |    |       |       |
|                                                                               |            |                        |                  |                                                     |             |                 |                            |                                           | 9                                   | 0.859       | 0.835       |       |                                                               |     |    |      |        |    |       |       |
|                                                                               |            |                        |                  |                                                     |             |                 |                            |                                           | 8                                   | 0.830       | 0.820       |       |                                                               |     |    |      |        |    |       |       |
| Cherpitel, 1998 <sup>9</sup>                                                  | 1995-96    | United States          | Specialized care | Emergency room patients                             | 479         | 203             | CIDI                       | DSM-IV/ICD-10                             | 8                                   | 0.830       | 0.820       |       |                                                               |     |    |      |        |    |       |       |
|                                                                               |            |                        |                  |                                                     |             |                 |                            |                                           | 8                                   | 0.830       | 0.820       |       |                                                               |     |    |      |        |    |       |       |
| Cherpitel et al., 2005 <sup>10</sup>                                          | n/a        | Poland                 | Specialized care | Emergency room patients                             | 677         | 153             | CIDI                       | DSM-IV/ICD-10                             | 3                                   | 0.990       | 0.410       |       |                                                               |     |    |      |        |    |       |       |
|                                                                               |            |                        |                  |                                                     |             |                 |                            |                                           | 4                                   | 0.940       | 0.500       |       |                                                               |     |    |      |        |    |       |       |
|                                                                               |            |                        |                  |                                                     |             |                 |                            |                                           | 5                                   | 0.880       | 0.610       |       |                                                               |     |    |      |        |    |       |       |
|                                                                               |            |                        |                  |                                                     |             |                 |                            |                                           | 6                                   | 0.840       | 0.690       |       |                                                               |     |    |      |        |    |       |       |
|                                                                               |            |                        |                  |                                                     |             |                 |                            |                                           | 7                                   | 0.790       | 0.780       |       |                                                               |     |    |      |        |    |       |       |
|                                                                               |            |                        |                  |                                                     |             |                 |                            |                                           | 8                                   | 0.710       | 0.860       |       |                                                               |     |    |      |        |    |       |       |
| Cherpitel & Borges, 2000 <sup>11</sup><br>Crawford et al., 2013 <sup>12</sup> | 1996-97    | Mexico                 | Specialized care | Emergency room patients                             | 681         | 179             | CIDI                       | DSM-IV/ICD-10                             | 8                                   | 0.789       | 0.851       |       |                                                               |     |    |      |        |    |       |       |
|                                                                               |            |                        |                  |                                                     |             |                 |                            |                                           | 8                                   | 0.789       | 0.851       |       |                                                               |     |    |      |        |    |       |       |
|                                                                               | 2005-11    | United States          | Primary care     | Veterans                                            | 1,414       | 140             | SCID                       | DSM-IV                                    | 7                                   | 0.860       | 0.820       |       |                                                               |     |    |      |        |    |       |       |
|                                                                               |            |                        |                  |                                                     |             |                 |                            |                                           | 8                                   | 0.800       | 0.860       |       |                                                               |     |    |      |        |    |       |       |
|                                                                               |            |                        |                  |                                                     |             |                 |                            |                                           | 9                                   | 0.740       | 0.900       |       |                                                               |     |    |      |        |    |       |       |
|                                                                               |            |                        |                  |                                                     |             |                 |                            |                                           | 10                                  | 0.700       | 0.930       |       |                                                               |     |    |      |        |    |       |       |
|                                                                               |            |                        |                  |                                                     |             |                 |                            |                                           | 11                                  | 0.650       | 0.950       |       |                                                               |     |    |      |        |    |       |       |
|                                                                               |            |                        |                  |                                                     |             |                 |                            |                                           | 12                                  | 0.590       | 0.960       |       |                                                               |     |    |      |        |    |       |       |
|                                                                               |            |                        |                  |                                                     |             |                 |                            |                                           | 13                                  | 0.550       | 0.970       |       |                                                               |     |    |      |        |    |       |       |
|                                                                               |            |                        |                  |                                                     |             |                 |                            |                                           | 14                                  | 0.520       | 0.970       |       |                                                               |     |    |      |        |    |       |       |
|                                                                               |            |                        |                  |                                                     |             |                 |                            |                                           | De Silva et al., 2008 <sup>13</sup> | n/a         | Sri Lanka   | Mixed | Participants recruited through a household survey or hospital | 238 | 88 | CIDI | DSM-IV | 14 | 1.000 | 0.700 |
|                                                                               |            |                        |                  |                                                     |             |                 |                            |                                           |                                     |             |             |       |                                                               |     |    |      |        | 15 | 0.989 | 0.733 |
|                                                                               |            |                        |                  |                                                     |             |                 |                            |                                           |                                     |             |             |       |                                                               |     |    |      |        | 16 | 0.966 | 0.747 |
|                                                                               |            |                        |                  |                                                     |             |                 |                            |                                           |                                     |             |             |       |                                                               |     |    |      |        | 17 | 0.943 | 0.787 |
| 18                                                                            | 0.943      | 0.813                  |                  |                                                     |             |                 |                            |                                           |                                     |             |             |       |                                                               |     |    |      |        |    |       |       |
| 19                                                                            | 0.932      | 0.867                  |                  |                                                     |             |                 |                            |                                           |                                     |             |             |       |                                                               |     |    |      |        |    |       |       |
| Dybek et al., 2006 <sup>14</sup>                                              | 2002-03    | Germany                | Primary care     | General practice patients                           | 2,989       | 198             | CIDI                       | DSM-IV                                    | 20                                  | 0.920       | 0.887       |       |                                                               |     |    |      |        |    |       |       |
|                                                                               |            |                        |                  |                                                     |             |                 |                            |                                           | 4                                   | 0.995       | 0.577       |       |                                                               |     |    |      |        |    |       |       |
|                                                                               |            |                        |                  |                                                     |             |                 |                            |                                           | 5                                   | 0.970       | 0.809       |       |                                                               |     |    |      |        |    |       |       |
|                                                                               |            |                        |                  |                                                     |             |                 |                            |                                           | 6                                   | 0.939       | 0.857       |       |                                                               |     |    |      |        |    |       |       |
|                                                                               |            |                        |                  |                                                     |             |                 |                            |                                           | 7                                   | 0.889       | 0.897       |       |                                                               |     |    |      |        |    |       |       |
|                                                                               |            |                        |                  |                                                     |             |                 |                            |                                           | 8                                   | 0.838       | 0.926       |       |                                                               |     |    |      |        |    |       |       |
| Foxcroft et al., 2015 <sup>15</sup>                                           | 2013       | United Kingdom         | Primary care     | General practice patients                           | 138         | 72              | CIDI                       | DSM-5                                     | 10                                  | 0.480       | 0.780       |       |                                                               |     |    |      |        |    |       |       |
|                                                                               |            |                        |                  |                                                     |             |                 |                            |                                           | 10                                  | 0.480       | 0.780       |       |                                                               |     |    |      |        |    |       |       |
| Gache et al., 2005 <sup>16</sup>                                              | n/a        | Switzerland/<br>France | Primary care     | General practice patients                           | 480         | 152             | SCID                       | DSM-IV                                    | 4                                   | 0.858       | 0.641       |       |                                                               |     |    |      |        |    |       |       |
|                                                                               |            |                        |                  |                                                     |             |                 |                            |                                           | 5                                   | 0.818       | 0.772       |       |                                                               |     |    |      |        |    |       |       |
|                                                                               |            |                        |                  |                                                     |             |                 |                            |                                           | 6                                   | 0.767       | 0.835       |       |                                                               |     |    |      |        |    |       |       |
|                                                                               |            |                        |                  |                                                     |             |                 |                            |                                           | 7                                   | 0.665       | 0.871       |       |                                                               |     |    |      |        |    |       |       |

| Reference                          | Study year | Country       | Setting                 | Population                                                                      | Sample size | Number of cases | Tool used to ascertain AUD | Diagnostic criteria used to establish AUD | Cutpoint | Sensitivity | Specificity |
|------------------------------------|------------|---------------|-------------------------|---------------------------------------------------------------------------------|-------------|-----------------|----------------------------|-------------------------------------------|----------|-------------|-------------|
| Gates et al., 2007 <sup>17</sup>   | 2004-05    | United States | Specialized care        | Aviation personnel referred for psychiatric evaluation                          | 111         | 22              | Psychiatric opinion        | DSM-IV                                    | 8        | 0.580       | 0.898       |
|                                    |            |               |                         |                                                                                 |             |                 |                            |                                           | 9        | 0.517       | 0.922       |
|                                    |            |               |                         |                                                                                 |             |                 |                            |                                           | 4        | 0.820       | 0.720       |
|                                    |            |               |                         |                                                                                 |             |                 |                            |                                           | 7        | 0.460       | 0.960       |
| Geneste et al., 2012 <sup>18</sup> | 2008       | France        | Specialized care        | Individuals admitted to the emergency department for acute alcohol intoxication | 122         | 112             | MINI                       | DSM-IV                                    | 7        | 0.980       | 0.400       |
|                                    |            |               |                         |                                                                                 |             |                 |                            |                                           | 8        | 0.940       | 0.500       |
|                                    |            |               |                         |                                                                                 |             |                 |                            |                                           | 12       | 0.880       | 1.000       |
| Gül et al., 2005 <sup>19</sup>     | 2002-03    | Turkey        | Specialized care        | Psychiatric patients                                                            | 85          | 57              | SCID                       | DSM-IV                                    | 8        | 0.966       | 0.750       |
|                                    |            |               |                         |                                                                                 |             |                 |                            |                                           | 14       | 0.814       | 0.882       |
| Kim et al., 2013 <sup>20</sup>     | 2010-12    | South Korea   | Specialized care        | Patients registered for an addictions program                                   | 497         | 193             | Psychiatric opinion        | DSM-IV                                    | 14       | 0.814       | 0.882       |
|                                    |            |               |                         |                                                                                 |             |                 |                            |                                           |          |             |             |
| Kim et al., 2014 <sup>21</sup>     | 2012       | South Korea   | Specialized care        | Patients who underwent a comprehensive medical examination                      | 210         | 48              | Psychiatric opinion        | DSM-IV                                    | 9        | 1.000       | 0.883       |
|                                    |            |               |                         |                                                                                 |             |                 |                            |                                           | 10       | 1.000       | 0.895       |
|                                    |            |               |                         |                                                                                 |             |                 |                            |                                           | 11       | 0.958       | 0.914       |
|                                    |            |               |                         |                                                                                 |             |                 |                            |                                           | 12       | 0.896       | 0.944       |
| Lundin et al., 2015 <sup>22</sup>  | 1998-2002  | Sweden        | Population-based survey | General population                                                              | 450         | 91              | SCAN                       | DSM-IV                                    | 4        | 1.000       | 0.310       |
|                                    |            |               |                         |                                                                                 |             |                 |                            |                                           | 5        | 0.890       | 0.510       |
|                                    |            |               |                         |                                                                                 |             |                 |                            |                                           | 6        | 0.890       | 0.640       |
|                                    |            |               |                         |                                                                                 |             |                 |                            |                                           | 7        | 0.760       | 0.740       |
|                                    |            |               |                         |                                                                                 |             |                 |                            |                                           | 8        | 0.700       | 0.790       |
|                                    |            |               |                         |                                                                                 |             |                 |                            |                                           | 9        | 0.690       | 0.840       |
|                                    |            |               |                         |                                                                                 |             |                 |                            |                                           | 10       | 0.680       | 0.890       |
|                                    |            |               |                         |                                                                                 |             |                 |                            |                                           | 4        | 0.593       | 0.465       |
|                                    |            |               |                         |                                                                                 |             |                 |                            |                                           | 6        | 0.370       | 0.744       |
|                                    |            |               |                         |                                                                                 |             |                 |                            |                                           | 8        | 0.333       | 0.907       |
| 11                                 | 0.259      | 0.954         |                         |                                                                                 |             |                 |                            |                                           |          |             |             |
| Nasvåg et al., 2010 <sup>24</sup>  | 2004-08    | Norway        | Specialized care        | First-episode psychosis patients                                                | 131         | 20              | SCID                       | DSM-IV                                    | 1        | 0.950       | 0.210       |
|                                    |            |               |                         |                                                                                 |             |                 |                            |                                           | 2        | 0.950       | 0.300       |
|                                    |            |               |                         |                                                                                 |             |                 |                            |                                           | 3        | 0.900       | 0.360       |
|                                    |            |               |                         |                                                                                 |             |                 |                            |                                           | 4        | 0.900       | 0.400       |
|                                    |            |               |                         |                                                                                 |             |                 |                            |                                           | 5        | 0.900       | 0.470       |
|                                    |            |               |                         |                                                                                 |             |                 |                            |                                           | 6        | 0.850       | 0.530       |
|                                    |            |               |                         |                                                                                 |             |                 |                            |                                           | 7        | 0.850       | 0.590       |
|                                    |            |               |                         |                                                                                 |             |                 |                            |                                           | 8        | 0.850       | 0.650       |
|                                    |            |               |                         |                                                                                 |             |                 |                            |                                           | 9        | 0.850       | 0.690       |
|                                    |            |               |                         |                                                                                 |             |                 |                            |                                           | 10       | 0.800       | 0.720       |
|                                    |            |               |                         |                                                                                 |             |                 |                            |                                           | 11       | 0.750       | 0.740       |
|                                    |            |               |                         |                                                                                 |             |                 |                            |                                           | 12       | 0.700       | 0.780       |
|                                    |            |               |                         |                                                                                 |             |                 |                            |                                           | 13       | 0.700       | 0.820       |
|                                    |            |               |                         |                                                                                 |             |                 |                            |                                           | 14       | 0.700       | 0.850       |
| Pradhan et al., 2012 <sup>25</sup> | 2009       | Nepal         | Specialized care        | Internal medicine outpatients                                                   | 544         | 241             | SCID                       | DSM-IV                                    | 4        | 0.998       | 0.386       |
|                                    |            |               |                         |                                                                                 |             |                 |                            |                                           | 5        | 0.996       | 0.558       |
|                                    |            |               |                         |                                                                                 |             |                 |                            |                                           | 6        | 0.996       | 0.670       |
|                                    |            |               |                         |                                                                                 |             |                 |                            |                                           | 7        | 0.988       | 0.835       |

| Reference                                   | Study year | Country       | Setting          | Population                                             | Sample size | Number of cases | Tool used to ascertain AUD | Diagnostic criteria used to establish AUD | Cutpoint | Sensitivity | Specificity |
|---------------------------------------------|------------|---------------|------------------|--------------------------------------------------------|-------------|-----------------|----------------------------|-------------------------------------------|----------|-------------|-------------|
|                                             |            |               |                  |                                                        |             |                 |                            |                                           | 8        | 0.975       | 0.878       |
|                                             |            |               |                  |                                                        |             |                 |                            |                                           | 9        | 0.967       | 0.917       |
|                                             |            |               |                  |                                                        |             |                 |                            |                                           | 10       | 0.934       | 0.927       |
|                                             |            |               |                  |                                                        |             |                 |                            |                                           | 11       | 0.917       | 0.964       |
|                                             |            |               |                  |                                                        |             |                 |                            |                                           | 12       | 0.892       | 0.970       |
|                                             |            |               |                  |                                                        |             |                 |                            |                                           | 13       | 0.851       | 0.980       |
|                                             |            |               |                  |                                                        |             |                 |                            |                                           | 14       | 0.805       | 0.990       |
|                                             |            |               |                  |                                                        |             |                 |                            |                                           | 15       | 0.743       | 0.990       |
| Ryou et al., 2012 <sup>26</sup>             | 2009       | South Korea   | Primary care     | Elderly drinkers                                       | 242         | 46              | Psychiatric opinion        | DSM-IV                                    | 10       | 0.957       | 0.832       |
|                                             |            |               |                  |                                                        |             |                 |                            |                                           | 11       | 0.913       | 0.908       |
|                                             |            |               |                  |                                                        |             |                 |                            |                                           | 12       | 0.870       | 0.929       |
| Steinbauer et al., 1998 <sup>27</sup>       | 1993-94    | United States | Primary care     | African American patients                              | 165         | 26              | AUDADIS                    | DSM-IV                                    | 5        | 0.920       | 0.740       |
|                                             |            |               |                  | Hispanic patients                                      | 132         | 19              |                            |                                           | 5        | 0.790       | 0.860       |
|                                             |            |               |                  | White patients                                         | 102         | 23              |                            |                                           | 5        | 0.910       | 0.730       |
| <b>Alcohol dependence</b>                   |            |               |                  |                                                        |             |                 |                            |                                           |          |             |             |
| Boschloo et al., 2010 <sup>4</sup>          | n/a        | Netherlands   | Mixed            | Individuals without depressive and/or anxiety disorder | 227         | 10              | CIDI                       | DSM-IV                                    | 5        | 1.000       | 0.410       |
|                                             |            |               |                  |                                                        |             |                 |                            |                                           | 6        | 0.900       | 0.570       |
|                                             |            |               |                  |                                                        |             |                 |                            |                                           | 7        | 0.900       | 0.660       |
|                                             |            |               |                  |                                                        |             |                 |                            |                                           | 8        | 0.800       | 0.750       |
|                                             |            |               |                  |                                                        |             |                 |                            |                                           | 9        | 0.800       | 0.820       |
|                                             |            |               |                  |                                                        |             |                 |                            |                                           | 10       | 0.800       | 0.850       |
|                                             |            |               |                  |                                                        |             |                 |                            |                                           | 11       | 0.800       | 0.900       |
|                                             |            |               |                  |                                                        |             |                 |                            |                                           | 12       | 0.500       | 0.930       |
|                                             |            |               |                  | Individuals without depressive and/or anxiety disorder | 539         | 74              |                            |                                           | 5        | 0.950       | 0.520       |
|                                             |            |               |                  |                                                        |             |                 |                            |                                           | 6        | 0.920       | 0.620       |
|                                             |            |               |                  |                                                        |             |                 |                            |                                           | 7        | 0.910       | 0.700       |
|                                             |            |               |                  |                                                        |             |                 |                            |                                           | 8        | 0.880       | 0.760       |
|                                             |            |               |                  |                                                        |             |                 |                            |                                           | 9        | 0.880       | 0.810       |
|                                             |            |               |                  |                                                        |             |                 |                            |                                           | 10       | 0.840       | 0.830       |
|                                             |            |               |                  |                                                        |             |                 |                            |                                           | 11       | 0.820       | 0.860       |
|                                             |            |               |                  |                                                        |             |                 |                            |                                           | 12       | 0.720       | 0.890       |
| Cherpitel, 1995 <sup>8</sup>                | 1992       | United States | Specialized care | Emergency room patients                                | 364         | 100             | CIDI                       | ICD-10                                    | 7        | 0.920       | 0.750       |
|                                             |            |               |                  |                                                        |             |                 |                            |                                           | 8        | 0.910       | 0.800       |
|                                             |            |               |                  |                                                        |             |                 |                            |                                           | 9        | 0.840       | 0.850       |
| Cherpitel, 1998 <sup>9</sup>                | 1995-96    | United States | Specialized care | Emergency room patients                                | 487         | 129             | CIDI                       | DSM-IV/ICD-10                             | 8        | 0.970       | 0.740       |
| Cherpitel et al., 2005 <sup>10</sup>        | n/a        | Poland        | Specialized care | Emergency room patients                                | 774         | 62              | CIDI                       | DSM-IV/ICD-10                             | 8        | 0.940       | 0.810       |
| Cherpitel & Borges, 2000 <sup>11</sup>      | 1996-97    | Mexico        | Specialized care | Emergency room patients                                | 736         | 65              | CIDI                       | DSM-IV/ICD-10                             | 8        | 0.940       | 0.870       |
| Contel Guillamón et al., 1999 <sup>28</sup> | n/a        | Spain         | Specialized care | Hospital patients                                      | 179         | 19              | n/a                        | DSM-III                                   | 7        | 0.905       | 0.677       |
|                                             |            |               |                  |                                                        |             |                 |                            |                                           | 8        | 0.873       | 0.754       |
|                                             |            |               |                  |                                                        |             |                 |                            |                                           | 9        | 0.873       | 0.844       |
|                                             |            |               |                  |                                                        |             |                 |                            |                                           | 10       | 0.841       | 0.886       |
|                                             |            |               |                  |                                                        |             |                 |                            |                                           | 11       | 0.778       | 0.916       |
|                                             |            |               |                  |                                                        |             |                 |                            |                                           | 12       | 0.714       | 0.934       |

| Reference                               | Study year | Country                | Setting                 | Population                                                                      | Sample size | Number of cases | Tool used to ascertain AUD | Diagnostic criteria used to establish AUD | Cutpoint | Sensitivity | Specificity |
|-----------------------------------------|------------|------------------------|-------------------------|---------------------------------------------------------------------------------|-------------|-----------------|----------------------------|-------------------------------------------|----------|-------------|-------------|
| Coulton et al., 2006 <sup>29</sup>      | n/a        | United Kingdom         | Primary care            | General practice patients                                                       | 194         | 50              | CIDI                       | DSM-IV                                    | 8        | 0.840       | 0.830       |
| Dybek et al., 2006 <sup>14</sup>        | 2002-03    | Germany                | Primary care            | General practice patients                                                       | 2,989       | 131             | CIDI                       | DSM-IV                                    | 4        | 1.000       | 0.564       |
|                                         |            |                        |                         |                                                                                 |             |                 |                            |                                           | 5        | 0.969       | 0.791       |
|                                         |            |                        |                         |                                                                                 |             |                 |                            |                                           | 6        | 0.962       | 0.840       |
|                                         |            |                        |                         |                                                                                 |             |                 |                            |                                           | 7        | 0.924       | 0.880       |
|                                         |            |                        |                         |                                                                                 |             |                 |                            |                                           | 8        | 0.893       | 0.911       |
| Endsley et al., 2017 <sup>30</sup>      | 2012-14    | India                  | Population-based survey | General population                                                              | 600         | 62              | MINI                       | DSM-IV                                    | 13       | 0.770       | 0.910       |
|                                         |            |                        |                         |                                                                                 |             |                 |                            |                                           | 20       | 0.440       | 0.980       |
| Foxcroft et al., 2015 <sup>15</sup>     | 2013       | United Kingdom         | Primary care            | General practice patients                                                       | 138         | 18              | CIDI                       | DSM-5                                     | 7        | 0.670       | 0.860       |
| Gache et al., 2005 <sup>16</sup>        | n/a        | Switzerland/<br>France | Primary care            | General practice patients                                                       | 480         | 70              | SCID                       | DSM-IV                                    | 9        | 0.818       | 0.875       |
|                                         |            |                        |                         |                                                                                 |             |                 |                            |                                           | 10       | 0.818       | 0.905       |
|                                         |            |                        |                         |                                                                                 |             |                 |                            |                                           | 11       | 0.818       | 0.922       |
|                                         |            |                        |                         |                                                                                 |             |                 |                            |                                           | 12       | 0.792       | 0.947       |
|                                         |            |                        |                         |                                                                                 |             |                 |                            |                                           | 13       | 0.701       | 0.952       |
|                                         |            |                        |                         |                                                                                 |             |                 |                            |                                           | 14       | 0.649       | 0.963       |
| Geneste et al., 2012 <sup>18</sup>      | 2008       | France                 | Specialized care        | Individuals admitted to the emergency department for acute alcohol intoxication | 122         | 98              | MINI                       | DSM-IV                                    | 8        | 0.960       | 0.330       |
|                                         |            |                        |                         |                                                                                 |             |                 |                            |                                           | 11       | 0.900       | 0.500       |
|                                         |            |                        |                         |                                                                                 |             |                 |                            |                                           | 14       | 0.860       | 0.710       |
|                                         |            |                        |                         |                                                                                 |             |                 |                            |                                           | 18       | 0.810       | 0.790       |
| Gül et al., 2005 <sup>19</sup>          | 2002-03    | Turkey                 | Specialized care        | Psychiatric patients                                                            | 85          | 29              | SCID                       | DSM-IV                                    | 8        | 1.000       | 0.750       |
| Johnson et al., 2013 <sup>31</sup>      | 2004-05    | United States          | Primary care            | General practice patients                                                       | 287         | 51              | DIS                        | DSM-IV                                    | 6        | 0.840       | 0.760       |
|                                         |            |                        |                         |                                                                                 |             |                 |                            |                                           | 7        | 0.710       | 0.840       |
|                                         |            |                        |                         |                                                                                 |             |                 |                            |                                           | 15       | 0.200       | 1.000       |
|                                         |            |                        |                         |                                                                                 |             |                 |                            |                                           | 16       | 0.160       | 1.000       |
|                                         |            |                        |                         |                                                                                 |             |                 |                            |                                           | 20       | 0.060       | 1.000       |
| Kim et al., 2013 <sup>20</sup>          | 2010-12    | South Korea            | Specialized care        | Patients registered for an addictions program                                   | 497         | 101             | Psychiatric opinion        | DSM-IV                                    | 19       | 0.881       | 0.931       |
| Li et al., 2003 <sup>32</sup>           | n/a        | China                  | Specialized care        | Factory workers                                                                 | 420         | 69              | Psychiatric opinion        | ICD-10                                    | 15       | 0.927       | 0.647       |
|                                         |            |                        |                         |                                                                                 |             |                 |                            |                                           | 16       | 0.927       | 0.709       |
|                                         |            |                        |                         |                                                                                 |             |                 |                            |                                           | 17       | 0.869       | 0.783       |
|                                         |            |                        |                         |                                                                                 |             |                 |                            |                                           | 18       | 0.815       | 0.846       |
|                                         |            |                        |                         |                                                                                 |             |                 |                            |                                           | 19       | 0.725       | 0.908       |
|                                         |            |                        |                         |                                                                                 |             |                 |                            |                                           | 20       | 0.681       | 0.940       |
| Lundin et al., 2015 <sup>22</sup>       | 1998-2002  | Sweden                 | Population-based survey | General population                                                              | 450         | 68              | SCAN                       | DSM-IV                                    | 4        | 1.000       | 0.300       |
|                                         |            |                        |                         |                                                                                 |             |                 |                            |                                           | 5        | 0.980       | 0.510       |
|                                         |            |                        |                         |                                                                                 |             |                 |                            |                                           | 6        | 0.980       | 0.630       |
|                                         |            |                        |                         |                                                                                 |             |                 |                            |                                           | 7        | 0.810       | 0.720       |
|                                         |            |                        |                         |                                                                                 |             |                 |                            |                                           | 8        | 0.790       | 0.780       |
| Meneses-Gaya et al., 2010 <sup>33</sup> | n/a        | Brazil                 | Specialized care        | Emergency room patients/patients of a care centre for alcohol and drug use      | 351         | 40              | SCID                       | DSM-IV                                    | 9        | 0.780       | 0.830       |
|                                         |            |                        |                         |                                                                                 |             |                 |                            |                                           | 13       | 0.900       | 0.920       |

| Reference                          | Study year | Country | Setting          | Population                    | Sample size | Number of cases | Tool used to ascertain AUD | Diagnostic criteria used to establish AUD | Cutpoint | Sensitivity | Specificity |
|------------------------------------|------------|---------|------------------|-------------------------------|-------------|-----------------|----------------------------|-------------------------------------------|----------|-------------|-------------|
| Pradhan et al., 2012 <sup>25</sup> | 2009       | Nepal   | Specialized care | Internal medicine outpatients | 544         | 191             | SCID                       | DSM-IV                                    | 9        | 0.974       | 0.796       |
|                                    |            |         |                  |                               |             |                 |                            |                                           | 10       | 0.948       | 0.813       |
|                                    |            |         |                  |                               |             |                 |                            |                                           | 11       | 0.927       | 0.844       |
|                                    |            |         |                  |                               |             |                 |                            |                                           | 12       | 0.901       | 0.853       |
|                                    |            |         |                  |                               |             |                 |                            |                                           | 13       | 0.869       | 0.873       |
|                                    |            |         |                  |                               |             |                 |                            |                                           | 14       | 0.822       | 0.887       |
| 15                                 | 0.754      | 0.892   |                  |                               |             |                 |                            |                                           |          |             |             |

AUDADIS: Alcohol Use Disorder and Associated Disabilities Interview Schedule; AUD: alcohol use disorders; CIDI: Composite International Diagnostic Interview; DIS: Diagnostic Interview Schedule; DSM-III: Diagnostic and Statistical Manual for Mental Disorders, Third Edition; DSM-IV: Diagnostic and Statistical Manual for Mental Disorders, Fourth Edition; DSM-5: Diagnostic and Statistical Manual for Mental Disorders, Fifth Edition; n/a: not available; MINI: Mini-International Neuropsychiatric Interview; SCAN: Schedules for Clinical Assessment in Neuropsychiatry; SCID: Structured Clinical Interview for the DSM

**eTable 2. Identified studies that validated the AUDIT for identifying alcohol use disorders and alcohol dependence among females**

| Reference                            | Study year | Country       | Setting          | Population                                             | Sample size | Number of cases | Tool used to ascertain AUD | Diagnostic criteria used to establish AUD | Cutpoint | Sensitivity | Specificity |
|--------------------------------------|------------|---------------|------------------|--------------------------------------------------------|-------------|-----------------|----------------------------|-------------------------------------------|----------|-------------|-------------|
| <b>Alcohol use disorders</b>         |            |               |                  |                                                        |             |                 |                            |                                           |          |             |             |
| Aertgeerts et al., 2001 <sup>1</sup> | n/a        | Belgium       | Primary care     | General practice patients                              | 1,021       | 46              | CIDI                       | DSM-III                                   | 5        | 0.652       | 0.919       |
|                                      |            |               |                  |                                                        |             |                 |                            |                                           | 6        | 0.587       | 0.959       |
|                                      |            |               |                  |                                                        |             |                 |                            |                                           | 7        | 0.565       | 0.976       |
| Boschloo et al., 2010 <sup>4</sup>   | n/a        | Netherlands   | Mixed            | Individuals without depressive and/or anxiety disorder | 773         | 23              | CIDI                       | DSM-IV                                    | 8        | 0.500       | 0.987       |
|                                      |            |               |                  |                                                        |             |                 |                            |                                           | 2        | 1.000       | 0.250       |
|                                      |            |               |                  |                                                        |             |                 |                            |                                           | 3        | 1.000       | 0.360       |
|                                      |            |               |                  |                                                        |             |                 |                            |                                           | 4        | 1.000       | 0.500       |
|                                      |            |               |                  |                                                        |             |                 |                            |                                           | 5        | 1.000       | 0.700       |
|                                      |            |               |                  | Individuals with depressive and/or anxiety disorder    | 2,244       | 122             |                            |                                           | 6        | 0.971       | 0.810       |
|                                      |            |               |                  |                                                        |             |                 |                            |                                           | 7        | 0.853       | 0.870       |
|                                      |            |               |                  |                                                        |             |                 |                            |                                           | 8        | 0.613       | 0.900       |
|                                      |            |               |                  |                                                        |             |                 |                            |                                           | 2        | 0.935       | 0.390       |
|                                      |            |               |                  |                                                        |             |                 |                            |                                           | 3        | 0.919       | 0.490       |
| Bradley et al., 2007 <sup>6</sup>    | 1993-94    | United States | Primary care     | Patients of an academic family practice clinic         | 927         | 83              | AUDADIS                    | DSM-IV                                    | 4        | 0.907       | 0.600       |
|                                      |            |               |                  |                                                        |             |                 |                            |                                           | 5        | 0.851       | 0.720       |
|                                      |            |               |                  |                                                        |             |                 |                            |                                           | 6        | 0.798       | 0.800       |
|                                      |            |               |                  |                                                        |             |                 |                            |                                           | 7        | 0.719       | 0.860       |
|                                      |            |               |                  |                                                        |             |                 |                            |                                           | 8        | 0.665       | 0.890       |
|                                      |            |               |                  |                                                        |             |                 |                            |                                           | 2        | 0.980       | 0.670       |
|                                      |            |               |                  |                                                        |             |                 |                            |                                           | 3        | 0.940       | 0.810       |
|                                      |            |               |                  |                                                        |             |                 |                            |                                           | 4        | 0.820       | 0.880       |
| Bush et al., 2003 <sup>34</sup>      | 2000       | United States | Primary care     | Veterans                                               | 393         | 39              | AUDADIS                    | DSM-IV                                    | 5        | 0.750       | 0.920       |
|                                      |            |               |                  |                                                        |             |                 |                            |                                           | 6        | 0.610       | 0.950       |
|                                      |            |               |                  |                                                        |             |                 |                            |                                           | 7        | 0.550       | 0.960       |
|                                      |            |               |                  |                                                        |             |                 |                            |                                           | 8        | 0.450       | 0.970       |
|                                      |            |               |                  |                                                        |             |                 |                            |                                           | 2        | 0.950       | 0.640       |
| Chang et al., 2016 <sup>7</sup>      | 2014-15    | South Korea   | Specialized care | Patients who underwent a comprehensive medical exam    | 177         | 21              | Psychiatric opinion        | DSM-5                                     | 3        | 0.770       | 0.790       |
|                                      |            |               |                  |                                                        |             |                 |                            |                                           | 4        | 0.690       | 0.890       |
|                                      |            |               |                  |                                                        |             |                 |                            |                                           | 5        | 0.620       | 0.970       |
|                                      |            |               |                  |                                                        |             |                 |                            |                                           | 3        | 1.000       | 0.813       |
| Cherpitel, 1995 <sup>8</sup>         | 1992       | United States | Specialized care | Emergency room patients                                | 407         | 93              | CIDI                       | ICD-10                                    | 4        | 1.000       | 0.885       |
|                                      |            |               |                  |                                                        |             |                 |                            |                                           | 5        | 0.950       | 0.892       |
|                                      |            |               |                  |                                                        |             |                 |                            |                                           | 7        | 0.730       | 0.950       |
| Cherpitel, 1998 <sup>9</sup>         | 1995-96    | United States | Specialized care | Emergency room patients                                | 363         | 97              | CIDI                       | DSM-IV/ICD-10                             | 8        | 0.690       | 0.970       |
|                                      |            |               |                  |                                                        |             |                 |                            |                                           | 9        | 0.610       | 0.965       |
|                                      |            |               |                  |                                                        |             |                 |                            |                                           | 8        | 0.550       | 0.940       |
| Cherpitel et al., 2005 <sup>10</sup> | n/a        | Poland        | Specialized care | Emergency room patients                                | 578         | 27              | CIDI                       | DSM-IV/ICD-10                             | 3        | 0.890       | 0.870       |
|                                      |            |               |                  |                                                        |             |                 |                            |                                           | 4        | 0.780       | 0.930       |
|                                      |            |               |                  |                                                        |             |                 |                            |                                           | 5        | 0.700       | 0.950       |
|                                      |            |               |                  |                                                        |             |                 |                            |                                           | 6        | 0.590       | 0.970       |
|                                      |            |               |                  |                                                        |             |                 |                            |                                           | 7        | 0.590       | 0.970       |
| 8                                    | 0.560      | 0.970         |                  |                                                        |             |                 |                            |                                           |          |             |             |



| Reference                                                                    | Study year      | Country                | Setting                          | Population                                                                      | Sample size  | Number of cases | Tool used to ascertain AUD | Diagnostic criteria used to establish AUD | Cutpoint | Sensitivity | Specificity |
|------------------------------------------------------------------------------|-----------------|------------------------|----------------------------------|---------------------------------------------------------------------------------|--------------|-----------------|----------------------------|-------------------------------------------|----------|-------------|-------------|
| Cherpitel & Borges, 2000 <sup>11</sup>                                       | 1996-97         | Mexico                 | Specialized care                 | Emergency room patients                                                         | 681          | 17              | CIDI                       | DSM-IV/ICD-10                             | 8        | 0.404       | 0.990       |
| Crawford et al., 2013 <sup>12</sup>                                          | 2005-11         | United States          | Primary care                     | Veterans                                                                        | 361          | 23              | SCID                       | DSM-IV                                    | 5        | 0.780       | 0.860       |
|                                                                              |                 |                        |                                  |                                                                                 |              |                 |                            |                                           | 6        | 0.780       | 0.910       |
|                                                                              |                 |                        |                                  |                                                                                 |              |                 |                            |                                           | 7        | 0.740       | 0.940       |
|                                                                              |                 |                        |                                  |                                                                                 |              |                 |                            |                                           | 8        | 0.700       | 0.950       |
|                                                                              |                 |                        |                                  |                                                                                 |              |                 |                            |                                           | 9        | 0.700       | 0.970       |
|                                                                              |                 |                        |                                  |                                                                                 |              |                 |                            |                                           | 10       | 0.610       | 0.970       |
| Cremonte & Cherpitel, 2008 <sup>35</sup><br>Dybek et al., 2006 <sup>14</sup> | 2001<br>2002-03 | Argentina<br>Germany   | Specialized care<br>Primary care | Emergency room patients<br>General practice patients                            | 239<br>4,089 | 5<br>82         | CIDI                       | DSM-IV                                    | 8        | 0.328       | 0.965       |
|                                                                              |                 |                        |                                  |                                                                                 |              |                 |                            |                                           | 4        | 0.963       | 0.807       |
|                                                                              |                 |                        |                                  |                                                                                 |              |                 |                            |                                           | 5        | 0.963       | 0.940       |
|                                                                              |                 |                        |                                  |                                                                                 |              |                 |                            |                                           | 6        | 0.878       | 0.963       |
|                                                                              |                 |                        |                                  |                                                                                 |              |                 |                            |                                           | 7        | 0.780       | 0.977       |
|                                                                              |                 |                        |                                  |                                                                                 |              |                 |                            |                                           | 8        | 0.683       | 0.983       |
| Foxcroft et al., 2015 <sup>15</sup>                                          | 2013            | United Kingdom         | Primary care                     | General practice patients                                                       | 282          | 112             | CIDI                       | DSM-5                                     | 6        | 0.630       | 0.740       |
|                                                                              |                 |                        |                                  |                                                                                 |              |                 |                            |                                           |          |             |             |
| Gache et al., 2005 <sup>16</sup>                                             | n/a             | Switzerland/<br>France | Primary care                     | General practice patients                                                       | 446          | 33              | SCID                       | DSM-IV                                    | 4        | 0.811       | 0.823       |
|                                                                              |                 |                        |                                  |                                                                                 |              |                 |                            |                                           | 5        | 0.784       | 0.884       |
|                                                                              |                 |                        |                                  |                                                                                 |              |                 |                            |                                           | 6        | 0.703       | 0.920       |
|                                                                              |                 |                        |                                  |                                                                                 |              |                 |                            |                                           | 7        | 0.703       | 0.948       |
|                                                                              |                 |                        |                                  |                                                                                 |              |                 |                            |                                           | 8        | 0.595       | 0.957       |
| Geneste et al., 2012 <sup>18</sup>                                           | 2008            | France                 | Specialized care                 | Individuals admitted to the emergency department for acute alcohol intoxication | 42           | 35              | MINI                       | DSM-IV                                    | 9        | 0.568       | 0.965       |
|                                                                              |                 |                        |                                  |                                                                                 |              |                 |                            |                                           | 7        | 1.000       | 0.710       |
|                                                                              |                 |                        |                                  |                                                                                 |              |                 |                            |                                           | 8        | 0.940       | 0.710       |
|                                                                              |                 |                        |                                  |                                                                                 |              |                 |                            |                                           | 12       | 0.890       | 0.710       |
| Kim et al., 2014 <sup>21</sup>                                               | 2012            | South Korea            | Specialized care                 | Patients who underwent a comprehensive medical examination                      | 225          | 18              | Psychiatric opinion        | DSM-IV                                    | 7        | 1.000       | 0.903       |
|                                                                              |                 |                        |                                  |                                                                                 |              |                 |                            |                                           | 8        | 1.000       | 0.937       |
|                                                                              |                 |                        |                                  |                                                                                 |              |                 |                            |                                           | 9        | 0.945       | 0.947       |
|                                                                              |                 |                        |                                  |                                                                                 |              |                 |                            |                                           | 10       | 0.778       | 0.957       |
| Lundin et al., 2015 <sup>22</sup>                                            | 1998-2002       | Sweden                 | Population-based survey          | General population                                                              | 636          | 41              | SCAN                       | DSM-IV                                    | 4        | 0.950       | 0.630       |
|                                                                              |                 |                        |                                  |                                                                                 |              |                 |                            |                                           | 5        | 0.940       | 0.780       |
|                                                                              |                 |                        |                                  |                                                                                 |              |                 |                            |                                           | 6        | 0.870       | 0.850       |
|                                                                              |                 |                        |                                  |                                                                                 |              |                 |                            |                                           | 7        | 0.830       | 0.890       |
|                                                                              |                 |                        |                                  |                                                                                 |              |                 |                            |                                           | 8        | 0.780       | 0.930       |
|                                                                              |                 |                        |                                  |                                                                                 |              |                 |                            |                                           | 9        | 0.710       | 0.940       |
|                                                                              |                 |                        |                                  |                                                                                 |              |                 |                            |                                           | 10       | 0.690       | 0.960       |
| Nasvåg et al., 2010 <sup>24</sup>                                            | 2004-08         | Norway                 | Specialized care                 | First-episode psychosis patients                                                | 74           | 8               | SCID                       | DSM-IV                                    | 1        | 1.000       | 0.150       |
|                                                                              |                 |                        |                                  |                                                                                 |              |                 |                            |                                           | 2        | 1.000       | 0.240       |
|                                                                              |                 |                        |                                  |                                                                                 |              |                 |                            |                                           | 3        | 0.880       | 0.320       |
|                                                                              |                 |                        |                                  |                                                                                 |              |                 |                            |                                           | 4        | 0.880       | 0.420       |
|                                                                              |                 |                        |                                  |                                                                                 |              |                 |                            |                                           | 5        | 0.880       | 0.530       |
|                                                                              |                 |                        |                                  |                                                                                 |              |                 |                            |                                           | 6        | 0.880       | 0.610       |
| 7                                                                            | 0.880           | 0.640                  |                                  |                                                                                 |              |                 |                            |                                           |          |             |             |

| Reference                                   | Study year | Country       | Setting          | Population                                                                                         | Sample size | Number of cases | Tool used to ascertain AUD | Diagnostic criteria used to establish AUD | Cutpoint | Sensitivity | Specificity |
|---------------------------------------------|------------|---------------|------------------|----------------------------------------------------------------------------------------------------|-------------|-----------------|----------------------------|-------------------------------------------|----------|-------------|-------------|
|                                             |            |               |                  |                                                                                                    |             |                 |                            |                                           | 8        | 0.880       | 0.710       |
|                                             |            |               |                  |                                                                                                    |             |                 |                            |                                           | 9        | 0.880       | 0.790       |
|                                             |            |               |                  |                                                                                                    |             |                 |                            |                                           | 10       | 0.880       | 0.830       |
|                                             |            |               |                  |                                                                                                    |             |                 |                            |                                           | 11       | 0.880       | 0.860       |
|                                             |            |               |                  |                                                                                                    |             |                 |                            |                                           | 12       | 0.880       | 0.880       |
|                                             |            |               |                  |                                                                                                    |             |                 |                            |                                           | 13       | 0.750       | 0.910       |
|                                             |            |               |                  |                                                                                                    |             |                 |                            |                                           | 14       | 0.750       | 0.950       |
| Péruña de Torres et al., 2009 <sup>36</sup> | 2005-06    | Spain         | Mixed            | Patients of a primary healthcare center, centre for drug addicts, or rehabilitation for alcoholics | 414         | 47              | SCAN                       | DSM-IV                                    | 3        | 0.917       | 0.725       |
|                                             |            |               |                  |                                                                                                    |             |                 |                            |                                           | 4        | 0.917       | 0.832       |
|                                             |            |               |                  |                                                                                                    |             |                 |                            |                                           | 5        | 0.896       | 0.915       |
|                                             |            |               |                  |                                                                                                    |             |                 |                            |                                           | 6        | 0.896       | 0.953       |
|                                             |            |               |                  |                                                                                                    |             |                 |                            |                                           | 7        | 0.896       | 0.964       |
|                                             |            |               |                  |                                                                                                    |             |                 |                            |                                           | 8        | 0.833       | 0.970       |
|                                             |            |               |                  |                                                                                                    |             |                 |                            |                                           | 9        | 0.813       | 0.989       |
|                                             |            |               |                  |                                                                                                    |             |                 |                            |                                           | 10       | 0.771       | 0.989       |
| Pradhan et al., 2012 <sup>25</sup>          | 2009       | Nepal         | Specialized care | Internal medicine outpatients                                                                      | 524         | 141             | SCID                       | DSM-IV                                    | 4        | 0.993       | 0.410       |
|                                             |            |               |                  |                                                                                                    |             |                 |                            |                                           | 5        | 0.986       | 0.593       |
|                                             |            |               |                  |                                                                                                    |             |                 |                            |                                           | 6        | 0.986       | 0.681       |
|                                             |            |               |                  |                                                                                                    |             |                 |                            |                                           | 7        | 0.979       | 0.830       |
|                                             |            |               |                  |                                                                                                    |             |                 |                            |                                           | 8        | 0.972       | 0.867       |
|                                             |            |               |                  |                                                                                                    |             |                 |                            |                                           | 9        | 0.943       | 0.914       |
|                                             |            |               |                  |                                                                                                    |             |                 |                            |                                           | 10       | 0.922       | 0.935       |
|                                             |            |               |                  |                                                                                                    |             |                 |                            |                                           | 11       | 0.879       | 0.958       |
|                                             |            |               |                  |                                                                                                    |             |                 |                            |                                           | 12       | 0.830       | 0.966       |
|                                             |            |               |                  |                                                                                                    |             |                 |                            |                                           | 13       | 0.794       | 0.974       |
|                                             |            |               |                  |                                                                                                    |             |                 |                            |                                           | 14       | 0.730       | 0.984       |
|                                             |            |               |                  |                                                                                                    |             |                 |                            |                                           | 15       | 0.652       | 0.987       |
| Steinbauer et al., 1998 <sup>27</sup>       | 1993-94    | United States | Primary care     | African American patients                                                                          | 347         | 33              | AUDADIS                    | DSM-IV                                    | 5        | 0.700       | 0.930       |
|                                             |            |               |                  | Hispanic patients                                                                                  | 339         | 27              |                            |                                           | 5        | 0.780       | 0.940       |
|                                             |            |               |                  | White patients                                                                                     | 248         | 23              |                            |                                           | 5        | 0.750       | 0.880       |
| <b>Alcohol dependence</b>                   |            |               |                  |                                                                                                    |             |                 |                            |                                           |          |             |             |
| Boschloo et al., 2010 <sup>4</sup>          | n/a        | Netherlands   | Mixed            | Individuals without depressive and/or anxiety disorder                                             | 381         | 6               | CIDI                       | DSM-IV                                    | 2        | 1.000       | 0.250       |
|                                             |            |               |                  |                                                                                                    |             |                 |                            |                                           | 3        | 1.000       | 0.360       |
|                                             |            |               |                  |                                                                                                    |             |                 |                            |                                           | 4        | 1.000       | 0.500       |
|                                             |            |               |                  |                                                                                                    |             |                 |                            |                                           | 5        | 1.000       | 0.700       |
|                                             |            |               |                  |                                                                                                    |             |                 |                            |                                           | 6        | 1.000       | 0.810       |
|                                             |            |               |                  |                                                                                                    |             |                 |                            |                                           | 7        | 1.000       | 0.870       |
|                                             |            |               |                  |                                                                                                    |             |                 |                            |                                           | 8        | 0.670       | 0.900       |
|                                             |            |               |                  | Individuals without depressive and/or anxiety disorder                                             | 1,152       | 91              |                            |                                           | 2        | 0.930       | 0.390       |
|                                             |            |               |                  |                                                                                                    |             |                 |                            |                                           | 3        | 0.930       | 0.490       |
|                                             |            |               |                  |                                                                                                    |             |                 |                            |                                           | 4        | 0.930       | 0.600       |
|                                             |            |               |                  |                                                                                                    |             |                 |                            |                                           | 5        | 0.880       | 0.720       |
|                                             |            |               |                  |                                                                                                    |             |                 |                            |                                           | 6        | 0.850       | 0.800       |
|                                             |            |               |                  |                                                                                                    |             |                 |                            |                                           | 7        | 0.770       | 0.860       |
|                                             |            |               |                  |                                                                                                    |             |                 |                            |                                           | 8        | 0.750       | 0.890       |
| Cherptel, 1995 <sup>8</sup>                 | 1992       | United States | Specialized care |                                                                                                    | 407         | 47              | CIDI                       | ICD-10                                    | 7        | 0.700       | 0.950       |

| Reference                                   | Study year | Country                | Setting                 | Population                                                                      | Sample size | Number of cases | Tool used to ascertain AUD | Diagnostic criteria used to establish AUD | Cutpoint                         | Sensitivity | Specificity |              |                           |       |    |      |        |   |       |       |
|---------------------------------------------|------------|------------------------|-------------------------|---------------------------------------------------------------------------------|-------------|-----------------|----------------------------|-------------------------------------------|----------------------------------|-------------|-------------|--------------|---------------------------|-------|----|------|--------|---|-------|-------|
| Cherpitel, 1998 <sup>9</sup>                | 1995-96    | United States          | Specialized care        | Emergency room patients                                                         | 369         | 46              | CIDI                       | DSM-IV/ICD-10                             | 8                                | 0.660       | 0.970       |              |                           |       |    |      |        |   |       |       |
|                                             |            |                        |                         | Emergency room patients                                                         |             |                 |                            |                                           | 9                                | 0.570       | 0.960       |              |                           |       |    |      |        |   |       |       |
| Cherpitel et al., 2005 <sup>10</sup>        | n/a        | Poland                 | Specialized care        | Emergency room patients                                                         | 598         | 9               | CIDI                       | DSM-IV/ICD-10                             | 8                                | 1.000       | 0.980       |              |                           |       |    |      |        |   |       |       |
| Cherpitel & Borges, 2000 <sup>11</sup>      | 1996-97    | Mexico                 | Specialized care        | Emergency room patients                                                         | 681         | 6               | CIDI                       | DSM-IV/ICD-10                             | 8                                | 0.670       | 0.990       |              |                           |       |    |      |        |   |       |       |
| Contel Guillamón et al., 1999 <sup>28</sup> | n/a        | Spain                  | Specialized care        | Hospital patients                                                               | 179         | 19              | n/a                        | DSM-III                                   | 7                                | 0.955       | 0.942       |              |                           |       |    |      |        |   |       |       |
|                                             |            |                        |                         |                                                                                 |             |                 |                            |                                           | 8                                | 0.955       | 0.955       |              |                           |       |    |      |        |   |       |       |
|                                             |            |                        |                         |                                                                                 |             |                 |                            |                                           | 9                                | 0.955       | 0.981       |              |                           |       |    |      |        |   |       |       |
|                                             |            |                        |                         |                                                                                 |             |                 |                            |                                           | 10                               | 0.955       | 0.994       |              |                           |       |    |      |        |   |       |       |
|                                             |            |                        |                         |                                                                                 |             |                 |                            |                                           | 11                               | 0.955       | 0.994       |              |                           |       |    |      |        |   |       |       |
| Cremonte & Cherpitel, 2008 <sup>35</sup>    | 2001       | Argentina              | Specialized care        | Emergency room patients                                                         | 239         | 2               | CIDI                       | DSM-IV                                    | 12                               | 0.864       | 0.994       |              |                           |       |    |      |        |   |       |       |
|                                             |            |                        |                         |                                                                                 |             |                 |                            |                                           | 8                                | 0.600       | 0.970       |              |                           |       |    |      |        |   |       |       |
|                                             |            |                        |                         |                                                                                 |             |                 |                            |                                           | Dybek et al., 2006 <sup>14</sup> | 2002-03     | Germany     | Primary care | General practice patients | 4,089 | 62 | CIDI | DSM-IV | 4 | 0.984 | 0.804 |
|                                             |            |                        |                         |                                                                                 |             |                 |                            |                                           |                                  |             |             |              |                           |       |    |      |        | 5 | 0.984 | 0.936 |
|                                             |            |                        |                         |                                                                                 |             |                 |                            |                                           |                                  |             |             |              |                           |       |    |      |        | 6 | 0.919 | 0.960 |
| 7                                           | 0.839      | 0.974                  |                         |                                                                                 |             |                 |                            |                                           |                                  |             |             |              |                           |       |    |      |        |   |       |       |
| 8                                           | 0.774      | 0.981                  |                         |                                                                                 |             |                 |                            |                                           |                                  |             |             |              |                           |       |    |      |        |   |       |       |
| Foxcroft et al., 2015 <sup>15</sup>         | 2013       | United Kingdom         | Primary care            | General practice patients                                                       | 282         | 24              | CIDI                       | DSM-5                                     | 7                                | 0.710       | 0.700       |              |                           |       |    |      |        |   |       |       |
|                                             |            |                        |                         |                                                                                 |             |                 |                            |                                           | 7                                | 0.710       | 0.700       |              |                           |       |    |      |        |   |       |       |
| Gache et al., 2005 <sup>16</sup>            | n/a        | Switzerland/<br>France | Primary care            | General practice patients                                                       | 446         | 18              | SCID                       | DSM-IV                                    | 9                                | 0.947       | 0.959       |              |                           |       |    |      |        |   |       |       |
|                                             |            |                        |                         |                                                                                 |             |                 |                            |                                           | 10                               | 0.947       | 0.971       |              |                           |       |    |      |        |   |       |       |
|                                             |            |                        |                         |                                                                                 |             |                 |                            |                                           | 11                               | 0.947       | 0.971       |              |                           |       |    |      |        |   |       |       |
|                                             |            |                        |                         |                                                                                 |             |                 |                            |                                           | 12                               | 0.947       | 0.982       |              |                           |       |    |      |        |   |       |       |
|                                             |            |                        |                         |                                                                                 |             |                 |                            |                                           | 13                               | 0.947       | 0.982       |              |                           |       |    |      |        |   |       |       |
|                                             |            |                        |                         |                                                                                 |             |                 |                            |                                           | 14                               | 0.895       | 0.982       |              |                           |       |    |      |        |   |       |       |
| Geneste et al., 2012 <sup>18</sup>          | 2008       | France                 | Specialized care        | Individuals admitted to the emergency department for acute alcohol intoxication | 42          | 30              | MINI                       | DSM-IV                                    | 15                               | 0.789       | 0.982       |              |                           |       |    |      |        |   |       |       |
|                                             |            |                        |                         |                                                                                 |             |                 |                            |                                           | 8                                | 1.000       | 0.580       |              |                           |       |    |      |        |   |       |       |
|                                             |            |                        |                         |                                                                                 |             |                 |                            |                                           | 11                               | 1.000       | 0.580       |              |                           |       |    |      |        |   |       |       |
|                                             |            |                        |                         |                                                                                 |             |                 |                            |                                           | 14                               | 0.900       | 0.670       |              |                           |       |    |      |        |   |       |       |
| Johnson et al., 2013 <sup>31</sup>          | 2004-05    | United States          | Primary care            | General practice patients                                                       | 338         | 33              | DIS                        | DSM-IV                                    | 18                               | 0.800       | 0.920       |              |                           |       |    |      |        |   |       |       |
|                                             |            |                        |                         |                                                                                 |             |                 |                            |                                           | 4                                | 0.880       | 0.760       |              |                           |       |    |      |        |   |       |       |
|                                             |            |                        |                         |                                                                                 |             |                 |                            |                                           | 5                                | 0.730       | 0.850       |              |                           |       |    |      |        |   |       |       |
|                                             |            |                        |                         |                                                                                 |             |                 |                            |                                           | 8                                | 0.390       | 0.960       |              |                           |       |    |      |        |   |       |       |
|                                             |            |                        |                         |                                                                                 |             |                 |                            |                                           | 13                               | 0.180       | 1.000       |              |                           |       |    |      |        |   |       |       |
|                                             |            |                        |                         |                                                                                 |             |                 |                            |                                           | 16                               | 0.120       | 1.000       |              |                           |       |    |      |        |   |       |       |
| Lundin et al., 2015 <sup>22</sup>           | 1998-2002  | Sweden                 | Population-based survey | General population                                                              | 636         | 28              | SCAN                       | DSM-IV                                    | 20                               | 0.030       | 1.000       |              |                           |       |    |      |        |   |       |       |
|                                             |            |                        |                         |                                                                                 |             |                 |                            |                                           | 4                                | 0.970       | 0.620       |              |                           |       |    |      |        |   |       |       |
|                                             |            |                        |                         |                                                                                 |             |                 |                            |                                           | 5                                | 0.970       | 0.770       |              |                           |       |    |      |        |   |       |       |
|                                             |            |                        |                         |                                                                                 |             |                 |                            |                                           | 6                                | 0.930       | 0.840       |              |                           |       |    |      |        |   |       |       |
|                                             |            |                        |                         |                                                                                 |             |                 |                            |                                           | 7                                | 0.870       | 0.880       |              |                           |       |    |      |        |   |       |       |
|                                             |            |                        |                         |                                                                                 |             |                 |                            |                                           | 8                                | 0.820       | 0.920       |              |                           |       |    |      |        |   |       |       |
| 9                                           | 0.770      | 0.940                  |                         |                                                                                 |             |                 |                            |                                           |                                  |             |             |              |                           |       |    |      |        |   |       |       |
| 10                                          | 0.770      | 0.960                  |                         |                                                                                 |             |                 |                            |                                           |                                  |             |             |              |                           |       |    |      |        |   |       |       |

| Reference                               | Study year | Country | Setting          | Population                                                                 | Sample size | Number of cases | Tool used to ascertain AUD | Diagnostic criteria used to establish AUD | Cutpoint | Sensitivity | Specificity |
|-----------------------------------------|------------|---------|------------------|----------------------------------------------------------------------------|-------------|-----------------|----------------------------|-------------------------------------------|----------|-------------|-------------|
| Meneses-Gaya et al., 2010 <sup>33</sup> | n/a        | Brazil  | Specialized care | Emergency room patients/patients of a care centre for alcohol and drug use | 179         | 19              | SCID                       | DSM-IV                                    | 12       | 0.820       | 0.970       |
| Pradhan et al., 2012 <sup>25</sup>      | 2009       | Nepal   | Specialized care | Internal medicine outpatients                                              | 524         | 113             | SCID                       | DSM-IV                                    | 9        | 0.938       | 0.854       |
|                                         |            |         |                  |                                                                            |             |                 |                            |                                           | 10       | 0.912       | 0.873       |
|                                         |            |         |                  |                                                                            |             |                 |                            |                                           | 11       | 0.894       | 0.905       |
|                                         |            |         |                  |                                                                            |             |                 |                            |                                           | 12       | 0.850       | 0.917       |
|                                         |            |         |                  |                                                                            |             |                 |                            |                                           | 13       | 0.814       | 0.927       |
|                                         |            |         |                  |                                                                            |             |                 |                            |                                           | 14       | 0.735       | 0.937       |
| 15                                      | 0.664      | 0.946   |                  |                                                                            |             |                 |                            |                                           |          |             |             |

AUDADIS: Alcohol Use Disorder and Associated Disabilities Interview Schedule; AUD: alcohol use disorders; CIDI: Composite International Diagnostic Interview; DIS: Diagnostic Interview Schedule; DSM-III: Diagnostic and Statistical Manual for Mental Disorders, Third Edition; DSM-IV: Diagnostic and Statistical Manual for Mental Disorders, Fourth Edition; DSM-5: Diagnostic and Statistical Manual for Mental Disorders, Fifth Edition; n/a: not available; MINI: Mini-International Neuropsychiatric Interview; SCAN: Schedules for Clinical Assessment in Neuropsychiatry; SCID: Structured Clinical Interview for the DSM

**eTable 3. Risk of bias and applicability assessments of the identified studies that validated the AUDIT for identifying alcohol use disorders and alcohol dependence**

| Reference                                   | Risk of bias      |            |                    |                 | Applicability concerns |            |                    |
|---------------------------------------------|-------------------|------------|--------------------|-----------------|------------------------|------------|--------------------|
|                                             | Patient selection | Index test | Reference standard | Flow and timing | Patient selection      | Index test | Reference standard |
| Aertgeerts et al., 2001 <sup>1</sup>        | ✓                 | ✓          | ✓                  | ?               | ✓                      | ✓          | ✓                  |
| Aertgeerts et al., 2002 <sup>2</sup>        | ✓                 | ✓          | ✓                  | ✓               | ✓                      | ✓          | ✓                  |
| Bergman et al., 1998 <sup>3</sup>           | X                 | ✓          | ✓                  | X               | ✓                      | ✓          | ✓                  |
| Boschloo et al., 2010 <sup>4</sup>          | ✓                 | X          | ✓                  | ✓               | ✓                      | ✓          | ✓                  |
| Bradley et al., 1998 <sup>5</sup>           | ✓                 | ✓          | ✓                  | ✓               | ✓                      | ✓          | ✓                  |
| Bradley et al., 2007 <sup>6</sup>           | ✓                 | ✓          | ✓                  | ?               | ✓                      | ✓          | ✓                  |
| Bush et al., 2003 <sup>34</sup>             | X                 | ✓          | ✓                  | X               | ✓                      | ✓          | ✓                  |
| Chang et al., 2016 <sup>7</sup>             | X                 | X          | ✓                  | ?               | ✓                      | ✓          | ✓                  |
| Cherpitel, 1995 <sup>8</sup>                | ✓                 | X          | ✓                  | ✓               | ✓                      | ✓          | ✓                  |
| Cherpitel, 1998 <sup>9</sup>                | ✓                 | X          | ✓                  | ✓               | ✓                      | ✓          | ✓                  |
| Cherpitel et al., 2005 <sup>10</sup>        | ✓                 | X          | ✓                  | ✓               | ✓                      | ✓          | ✓                  |
| Cherpitel & Borges, 2000 <sup>11</sup>      | X                 | X          | ✓                  | ✓               | ✓                      | ✓          | ✓                  |
| Contel Guillamón et al., 1999 <sup>28</sup> | ✓                 | ✓          | ✓                  | ✓               | ✓                      | ✓          | ✓                  |
| Coulton et al., 2006 <sup>29</sup>          | ✓                 | ✓          | ✓                  | ?               | ✓                      | ✓          | ✓                  |
| Crawford et al., 2013 <sup>12</sup>         | X                 | X          | ✓                  | ✓               | ✓                      | ✓          | ✓                  |
| Cremonte & Cherpitel, 2008 <sup>35</sup>    | X                 | X          | ✓                  | ✓               | ✓                      | ✓          | ✓                  |
| De Silva et al., 2008 <sup>13</sup>         | ✓                 | X          | ✓                  | ?               | ✓                      | ✓          | ✓                  |
| Dybek et al., 2006 <sup>14</sup>            | X                 | X          | ✓                  | X               | ✓                      | ✓          | ✓                  |
| Endsley et al., 2017 <sup>30</sup>          | ✓                 | ✓          | ✓                  | ?               | ✓                      | ✓          | ✓                  |
| Foxcroft et al., 2015 <sup>15</sup>         | X                 | ✓          | ✓                  | X               | ✓                      | ✓          | ✓                  |
| Gache et al., 2005 <sup>16</sup>            | X                 | ✓          | ✓                  | ?               | ✓                      | ✓          | ✓                  |
| Gates et al., 2007 <sup>17</sup>            | X                 | X          | ✓                  | ?               | ✓                      | ✓          | ✓                  |
| Geneste et al., 2012 <sup>18</sup>          | X                 | X          | ✓                  | ?               | ✓                      | ✓          | ✓                  |
| Gül et al., 2005 <sup>19</sup>              | X                 | ✓          | ✓                  | ✓               | ✓                      | ✓          | ✓                  |
| Johnson et al., 2013 <sup>31</sup>          | X                 | X          | ✓                  | ✓               | ✓                      | ✓          | ✓                  |
| Kim et al., 2013 <sup>20</sup>              | X                 | X          | ✓                  | ?               | ✓                      | ✓          | ✓                  |
| Kim et al., 2014 <sup>21</sup>              | X                 | X          | ✓                  | ?               | ✓                      | ✓          | ✓                  |
| Li et al., 2003 <sup>32</sup>               | X                 | ?          | ✓                  | ?               | ✓                      | ✓          | ✓                  |
| Lundin et al., 2015 <sup>22</sup>           | ✓                 | ✓          | ✓                  | ?               | ✓                      | ✓          | ✓                  |
| Meneses-Gaya et al., 2010 <sup>33</sup>     | X                 | ✓          | ✓                  | ✓               | ✓                      | ✓          | ✓                  |
| Morton et al., 1996 <sup>23</sup>           | X                 | X          | ✓                  | ✓               | ✓                      | ✓          | ✓                  |
| Nasvåg et al., 2010 <sup>24</sup>           | X                 | X          | ✓                  | ?               | ✓                      | ✓          | ✓                  |
| Pérula de Torres et al., 2009 <sup>36</sup> | ✓                 | ✓          | ✓                  | ?               | ✓                      | ✓          | ✓                  |
| Pradhan et al., 2012 <sup>25</sup>          | ✓                 | ✓          | ✓                  | ✓               | ✓                      | ✓          | ✓                  |
| Ryou et al., 2012 <sup>26</sup>             | X                 | X          | ✓                  | ?               | ✓                      | ✓          | ✓                  |
| Steinbauer et al., 1998 <sup>27</sup>       | ✓                 | ✓          | ✓                  | ✓               | ✓                      | ✓          | ✓                  |

✓ = low risk; X = high risk; ? = unclear

**eTable 4. Heterogeneity estimates for the sensitivity and specificity of the Alcohol Use Disorder Identification Test in identifying alcohol use disorders and alcohol dependence**

| Disorder/statistic/sex       | Observations | I <sup>2</sup> | Cochran's Q    |         |
|------------------------------|--------------|----------------|----------------|---------|
|                              |              |                | Point Estimate | p-value |
| <b>Alcohol use disorders</b> |              |                |                |         |
| Sensitivity                  |              |                |                |         |
| Men                          | 144          | 92.8           | 1965.8         | <0.001  |
| Women                        | 115          | 85.3           | 763.9          | <0.001  |
| Specificity                  |              |                |                |         |
| Men                          | 144          | 95.7           | 3258.0         | <0.001  |
| Women                        | 115          | 98.1           | 5814.5         | <0.001  |
| <b>Alcohol dependence</b>    |              |                |                |         |
| Sensitivity                  |              |                |                |         |
| Men                          | 76           | 87.4           | 578.3          | <0.001  |
| Women                        | 65           | 78.9           | 294.1          | <0.001  |
| Specificity                  |              |                |                |         |
| Men                          | 76           | 96.9           | 2320.7         | <0.001  |
| Women                        | 65           | 98.0           | 3109.9         | <0.001  |

**eTable 5. Screening statistics for alcohol use disorders using an AUDIT cut-point which provides specificities of 0.90, 0.95, and 0.98 by country and sex**

| Country     | Sex   | Standard drink size (grams) | Prevalence (%) of AUD | AUDIT cut-point | Specificity | Specificity (actual) | Sensitivity (95% UI) | People who have an AUD and a positive AUDIT score [per 100 people screened] (95% UI) | People who do not have an AUD and a positive AUDIT score [per 100 people screened] (95% UI) | Number of people needed to screen to treat one AUD case (95% UI) |
|-------------|-------|-----------------------------|-----------------------|-----------------|-------------|----------------------|----------------------|--------------------------------------------------------------------------------------|---------------------------------------------------------------------------------------------|------------------------------------------------------------------|
| Afghanistan | Men   | 10                          | 0.6                   | 13              | 0.90        | 0.901                | 0.829 (0.784, 0.870) | 0.5 (0.2, 1.2)                                                                       | 9.9 (7.9, 12.0)                                                                             | 188 (86, 402)                                                    |
|             |       | 10                          | 0.6                   | 16              | 0.95        | 0.949                | 0.810 (0.753, 0.866) | 0.5 (0.2, 1.1)                                                                       | 5 (3.1, 7.1)                                                                                | 192 (89, 415)                                                    |
|             |       | 10                          | 0.6                   | 19              | 0.98        | 0.981                | 0.792 (0.719, 0.861) | 0.5 (0.2, 1.1)                                                                       | 1.9 (0.5, 3.7)                                                                              | 197 (91, 431)                                                    |
|             | Women | 10                          | 0.1                   | 7               | 0.90        | 0.889                | 0.848 (0.812, 0.881) | 0.1 (<0.1, 0.5)                                                                      | 11.1 (8.8, 13.7)                                                                            | 974 (193, 5281)                                                  |
|             |       | 10                          | 0.1                   | 9               | 0.95        | 0.944                | 0.810 (0.764, 0.853) | 0.1 (<0.1, 0.5)                                                                      | 5.6 (3.6, 7.9)                                                                              | 1020 (203, 5591)                                                 |
|             |       | 10                          | 0.1                   | 11              | 0.98        | 0.979                | 0.773 (0.711, 0.831) | 0.1 (<0.1, 0.5)                                                                      | 2.1 (0.7, 4.1)                                                                              | 1068 (211, 5920)                                                 |
| Albania     | Men   | 10                          | 9.9                   | 13              | 0.90        | 0.901                | 0.829 (0.784, 0.870) | 8.2 (6.8, 9.8)                                                                       | 8.9 (7.1, 10.9)                                                                             | 12 (10, 15)                                                      |
|             |       | 10                          | 9.9                   | 16              | 0.95        | 0.949                | 0.810 (0.753, 0.866) | 8 (6.6, 9.7)                                                                         | 4.6 (2.9, 6.4)                                                                              | 12 (10, 15)                                                      |
|             |       | 10                          | 9.9                   | 19              | 0.98        | 0.981                | 0.792 (0.719, 0.861) | 7.8 (6.4, 9.5)                                                                       | 1.7 (0.5, 3.3)                                                                              | 13 (10, 16)                                                      |
|             | Women | 10                          | 2.1                   | 7               | 0.90        | 0.889                | 0.848 (0.812, 0.881) | 1.8 (1.2, 2.8)                                                                       | 10.9 (8.6, 13.5)                                                                            | 55 (36, 83)                                                      |
|             |       | 10                          | 2.1                   | 9               | 0.95        | 0.944                | 0.810 (0.764, 0.853) | 1.7 (1.1, 2.7)                                                                       | 5.5 (3.5, 7.8)                                                                              | 58 (37, 88)                                                      |
|             |       | 10                          | 2.1                   | 11              | 0.98        | 0.979                | 0.773 (0.711, 0.831) | 1.7 (1.1, 2.6)                                                                       | 2.1 (0.7, 4.0)                                                                              | 60 (39, 92)                                                      |
| Algeria     | Men   | 10                          | 1.5                   | 13              | 0.90        | 0.901                | 0.829 (0.784, 0.870) | 1.2 (0.7, 2.0)                                                                       | 9.8 (7.8, 11.9)                                                                             | 82 (50, 142)                                                     |
|             |       | 10                          | 1.5                   | 16              | 0.95        | 0.949                | 0.810 (0.753, 0.866) | 1.2 (0.7, 2.0)                                                                       | 5 (3.1, 7.0)                                                                                | 84 (51, 145)                                                     |
|             |       | 10                          | 1.5                   | 19              | 0.98        | 0.981                | 0.792 (0.719, 0.861) | 1.2 (0.7, 1.9)                                                                       | 1.9 (0.5, 3.6)                                                                              | 86 (52, 150)                                                     |
|             | Women | 10                          | 0.0                   | 7               | 0.90        | 0.889                | 0.848 (0.812, 0.881) | <0.1 (<0.1, 0.8)                                                                     | 11.1 (8.8, 13.7)                                                                            | 3169 (132, 69958)                                                |
|             |       | 10                          | 0.0                   | 9               | 0.95        | 0.944                | 0.810 (0.764, 0.853) | <0.1 (<0.1, 0.7)                                                                     | 5.6 (3.6, 7.9)                                                                              | 3320 (140, 73441)                                                |
|             |       | 10                          | 0.0                   | 11              | 0.98        | 0.979                | 0.773 (0.711, 0.831) | <0.1 (<0.1, 0.7)                                                                     | 2.1 (0.7, 4.1)                                                                              | 3478 (147, 77154)                                                |
| Andorra     | Men   | 10                          | 9.8                   | 13              | 0.90        | 0.901                | 0.829 (0.784, 0.870) | 8.1 (6.6, 10.0)                                                                      | 9 (7.1, 10.9)                                                                               | 12 (10, 15)                                                      |
|             |       | 10                          | 9.8                   | 16              | 0.95        | 0.949                | 0.810 (0.753, 0.866) | 7.9 (6.4, 9.7)                                                                       | 4.6 (2.9, 6.4)                                                                              | 13 (10, 16)                                                      |
|             |       | 10                          | 9.8                   | 19              | 0.98        | 0.981                | 0.792 (0.719, 0.861) | 7.8 (6.2, 9.7)                                                                       | 1.7 (0.5, 3.3)                                                                              | 13 (10, 16)                                                      |
|             | Women | 10                          | 2.2                   | 7               | 0.90        | 0.889                | 0.848 (0.812, 0.881) | 1.8 (1.2, 2.8)                                                                       | 10.9 (8.6, 13.5)                                                                            | 54 (36, 82)                                                      |

| Country             | Sex   | Standard drink size (grams) | Prevalence (%) of AUD | AUDIT cut-point | Specificity | Specificity (actual) | Sensitivity (95% UI) | People who have an AUD and a positive AUDIT score [per 100 people screened] (95% UI) | People who do not have an AUD and a positive AUDIT score [per 100 people screened] (95% UI) | Number of people needed to screen to treat one AUD case (95% UI) |
|---------------------|-------|-----------------------------|-----------------------|-----------------|-------------|----------------------|----------------------|--------------------------------------------------------------------------------------|---------------------------------------------------------------------------------------------|------------------------------------------------------------------|
| Angola              | Men   | 10                          | 2.2                   | 9               | 0.95        | 0.944                | 0.810 (0.764, 0.853) | 1.8 (1.2, 2.7)                                                                       | 5.5 (3.6, 7.8)                                                                              | 57 (38, 86)                                                      |
|                     |       | 10                          | 2.2                   | 11              | 0.98        | 0.979                | 0.773 (0.711, 0.831) | 1.7 (1.1, 2.5)                                                                       | 2.1 (0.7, 4.0)                                                                              | 60 (39, 91)                                                      |
|                     |       | 10                          | 10.6                  | 13              | 0.90        | 0.901                | 0.829 (0.784, 0.870) | 8.8 (7.3, 10.6)                                                                      | 8.9 (7.0, 10.8)                                                                             | 11 (9, 14)                                                       |
|                     | Women | 10                          | 10.6                  | 16              | 0.95        | 0.949                | 0.810 (0.753, 0.866) | 8.6 (7.1, 10.4)                                                                      | 4.5 (2.8, 6.4)                                                                              | 12 (10, 14)                                                      |
|                     |       | 10                          | 10.6                  | 19              | 0.98        | 0.981                | 0.792 (0.719, 0.861) | 8.4 (6.9, 10.2)                                                                      | 1.7 (0.5, 3.3)                                                                              | 12 (10, 14)                                                      |
|                     |       | 10                          | 1.7                   | 7               | 0.90        | 0.889                | 0.848 (0.812, 0.881) | 1.4 (0.9, 2.2)                                                                       | 10.9 (8.7, 13.6)                                                                            | 71 (46, 117)                                                     |
| Antigua and Barbuda | Men   | 10                          | 1.7                   | 9               | 0.95        | 0.944                | 0.810 (0.764, 0.853) | 1.3 (0.8, 2.1)                                                                       | 5.5 (3.6, 7.8)                                                                              | 74 (48, 123)                                                     |
|                     |       | 10                          | 1.7                   | 11              | 0.98        | 0.979                | 0.773 (0.711, 0.831) | 1.3 (0.8, 2.0)                                                                       | 2.1 (0.7, 4.0)                                                                              | 78 (50, 128)                                                     |
|                     |       | 10                          | 9.8                   | 13              | 0.90        | 0.901                | 0.829 (0.784, 0.870) | 8.1 (6.7, 9.8)                                                                       | 9 (7.1, 10.9)                                                                               | 12 (10, 15)                                                      |
|                     | Women | 10                          | 9.8                   | 16              | 0.95        | 0.949                | 0.810 (0.753, 0.866) | 7.9 (6.4, 9.6)                                                                       | 4.6 (2.9, 6.4)                                                                              | 13 (10, 16)                                                      |
|                     |       | 10                          | 9.8                   | 19              | 0.98        | 0.981                | 0.792 (0.719, 0.861) | 7.7 (6.2, 9.4)                                                                       | 1.7 (0.5, 3.3)                                                                              | 13 (11, 16)                                                      |
|                     |       | 10                          | 3.7                   | 7               | 0.90        | 0.889                | 0.848 (0.812, 0.881) | 3.1 (2.2, 4.2)                                                                       | 10.7 (8.5, 13.2)                                                                            | 32 (24, 45)                                                      |
| Argentina           | Men   | 10                          | 3.7                   | 9               | 0.95        | 0.944                | 0.810 (0.764, 0.853) | 3 (2.1, 4.1)                                                                         | 5.4 (3.5, 7.6)                                                                              | 34 (25, 47)                                                      |
|                     |       | 10                          | 3.7                   | 11              | 0.98        | 0.979                | 0.773 (0.711, 0.831) | 2.8 (2.0, 3.9)                                                                       | 2.1 (0.7, 3.9)                                                                              | 35 (25, 50)                                                      |
|                     |       | 10                          | 10.8                  | 13              | 0.90        | 0.901                | 0.829 (0.784, 0.870) | 9 (7.4, 10.8)                                                                        | 8.9 (7.0, 10.7)                                                                             | 11 (9, 13)                                                       |
|                     | Women | 10                          | 10.8                  | 16              | 0.95        | 0.949                | 0.810 (0.753, 0.866) | 8.7 (7.2, 10.5)                                                                      | 4.5 (2.8, 6.4)                                                                              | 11 (10, 14)                                                      |
|                     |       | 10                          | 10.8                  | 19              | 0.98        | 0.981                | 0.792 (0.719, 0.861) | 8.5 (7.0, 10.3)                                                                      | 1.7 (0.5, 3.3)                                                                              | 12 (10, 14)                                                      |
|                     |       | 10                          | 3.0                   | 7               | 0.90        | 0.889                | 0.848 (0.812, 0.881) | 2.6 (1.8, 3.7)                                                                       | 10.8 (8.5, 13.3)                                                                            | 39 (27, 54)                                                      |
| Armenia             | Men   | 10                          | 3.0                   | 9               | 0.95        | 0.944                | 0.810 (0.764, 0.853) | 2.5 (1.8, 3.6)                                                                       | 5.4 (3.5, 7.7)                                                                              | 41 (28, 57)                                                      |
|                     |       | 10                          | 3.0                   | 11              | 0.98        | 0.979                | 0.773 (0.711, 0.831) | 2.3 (1.7, 3.4)                                                                       | 2.1 (0.7, 4.0)                                                                              | 43 (30, 60)                                                      |
|                     |       | 10                          | 9.9                   | 13              | 0.90        | 0.901                | 0.829 (0.784, 0.870) | 8.2 (6.8, 10.0)                                                                      | 8.9 (7.1, 10.9)                                                                             | 12 (10, 15)                                                      |
|                     |       | 10                          | 9.9                   | 16              | 0.95        | 0.949                | 0.810 (0.753, 0.866) | 8 (6.6, 9.7)                                                                         | 4.6 (2.9, 6.4)                                                                              | 12 (10, 15)                                                      |



| Country    | Sex   | Standard drink size (grams) | Prevalence (%) of AUD | AUDIT cut-point | Specificity | Specificity (actual) | Sensitivity (95% UI) | People who have an AUD and a positive AUDIT score [per 100 people screened] (95% UI) | People who do not have an AUD and a positive AUDIT score [per 100 people screened] (95% UI) | Number of people needed to screen to treat one AUD case (95% UI) |
|------------|-------|-----------------------------|-----------------------|-----------------|-------------|----------------------|----------------------|--------------------------------------------------------------------------------------|---------------------------------------------------------------------------------------------|------------------------------------------------------------------|
| Australia  | Women | 10                          | 9.9                   | 19              | 0.98        | 0.981                | 0.792 (0.719, 0.861) | 7.9 (6.4, 9.6)                                                                       | 1.7 (0.5, 3.3)                                                                              | 13 (10, 16)                                                      |
|            |       | 10                          | 2.2                   | 7               | 0.90        | 0.889                | 0.848 (0.812, 0.881) | 1.8 (1.2, 2.7)                                                                       | 10.9 (8.6, 13.4)                                                                            | 55 (38, 83)                                                      |
|            |       | 10                          | 2.2                   | 9               | 0.95        | 0.944                | 0.810 (0.764, 0.853) | 1.7 (1.1, 2.6)                                                                       | 5.5 (3.6, 7.7)                                                                              | 57 (39, 88)                                                      |
|            |       | 10                          | 2.2                   | 11              | 0.98        | 0.979                | 0.773 (0.711, 0.831) | 1.7 (1.1, 2.5)                                                                       | 2.1 (0.7, 4.0)                                                                              | 60 (41, 93)                                                      |
|            |       | 10                          | 6.1                   | 13              | 0.90        | 0.901                | 0.829 (0.784, 0.870) | 5.1 (3.9, 6.4)                                                                       | 9.3 (7.4, 11.4)                                                                             | 20 (16, 26)                                                      |
|            | Men   | 10                          | 6.1                   | 16              | 0.95        | 0.949                | 0.810 (0.753, 0.866) | 5 (3.8, 6.2)                                                                         | 4.8 (3.0, 6.7)                                                                              | 20 (16, 26)                                                      |
|            |       | 10                          | 6.1                   | 19              | 0.98        | 0.981                | 0.792 (0.719, 0.861) | 4.8 (3.7, 6.1)                                                                       | 1.8 (0.5, 3.4)                                                                              | 21 (16, 27)                                                      |
|            |       | 10                          | 2.7                   | 7               | 0.90        | 0.889                | 0.848 (0.812, 0.881) | 2.3 (1.6, 3.2)                                                                       | 10.8 (8.5, 13.3)                                                                            | 44 (31, 63)                                                      |
|            |       | 10                          | 2.7                   | 9               | 0.95        | 0.944                | 0.810 (0.764, 0.853) | 2.2 (1.5, 3.1)                                                                       | 5.5 (3.5, 7.7)                                                                              | 46 (33, 66)                                                      |
|            |       | 10                          | 2.7                   | 11              | 0.98        | 0.979                | 0.773 (0.711, 0.831) | 2.1 (1.4, 2.9)                                                                       | 2.1 (0.7, 4.0)                                                                              | 48 (35, 71)                                                      |
| Austria    | Men   | 20                          | 18.1                  | 9               | 0.90        | 0.912                | 0.674 (0.517, 0.804) | 12.2 (9.1, 15.4)                                                                     | 7.2 (3.1, 12.2)                                                                             | 8 (6, 11)                                                        |
|            |       | 20                          | 18.1                  | 11              | 0.95        | 0.95                 | 0.655 (0.494, 0.798) | 11.8 (8.8, 15.1)                                                                     | 4.1 (1.0, 8.4)                                                                              | 8 (7, 11)                                                        |
|            |       | 20                          | 18.1                  | 13              | 0.98        | 0.976                | 0.637 (0.470, 0.793) | 11.5 (8.4, 15.0)                                                                     | 2 (<0.1, 5.5)                                                                               | 9 (7, 12)                                                        |
|            | Women | 20                          | 6.1                   | 7               | 0.90        | 0.903                | 0.573 (0.387, 0.725) | 3.5 (2.3, 5.0)                                                                       | 9.1 (3.5, 17.4)                                                                             | 28 (20, 44)                                                      |
|            |       | 20                          | 6.1                   | 9               | 0.95        | 0.954                | 0.523 (0.337, 0.679) | 3.2 (2.0, 4.7)                                                                       | 4.3 (0.6, 10.6)                                                                             | 31 (21, 50)                                                      |
|            |       | 20                          | 6.1                   | 11              | 0.98        | 0.985                | 0.479 (0.293, 0.639) | 2.9 (1.7, 4.4)                                                                       | 1.4 (<0.1, 6.0)                                                                             | 34 (23, 57)                                                      |
| Azerbaijan | Men   | 10                          | 10.0                  | 13              | 0.90        | 0.901                | 0.829 (0.784, 0.870) | 8.3 (6.8, 10.0)                                                                      | 8.9 (7.1, 10.9)                                                                             | 12 (10, 15)                                                      |
|            |       | 10                          | 10.0                  | 16              | 0.95        | 0.949                | 0.810 (0.753, 0.866) | 8.1 (6.6, 9.8)                                                                       | 4.6 (2.8, 6.4)                                                                              | 12 (10, 15)                                                      |
|            |       | 10                          | 10.0                  | 19              | 0.98        | 0.981                | 0.792 (0.719, 0.861) | 7.9 (6.4, 9.7)                                                                       | 1.7 (0.5, 3.3)                                                                              | 13 (10, 16)                                                      |
|            | Women | 10                          | 2.1                   | 7               | 0.90        | 0.889                | 0.848 (0.812, 0.881) | 1.8 (1.2, 2.8)                                                                       | 10.9 (8.6, 13.4)                                                                            | 55 (36, 81)                                                      |
|            |       | 10                          | 2.1                   | 9               | 0.95        | 0.944                | 0.810 (0.764, 0.853) | 1.7 (1.2, 2.7)                                                                       | 5.5 (3.6, 7.8)                                                                              | 58 (37, 85)                                                      |
|            |       | 10                          | 2.1                   | 11              | 0.98        | 0.979                | 0.773 (0.711, 0.831) | 1.7 (1.1, 2.6)                                                                       | 2.1 (0.7, 4.0)                                                                              | 60 (39, 90)                                                      |

| Country    | Sex   | Standard drink size (grams) | Prevalence (%) of AUD | AUDIT cut-point | Specificity | Specificity (actual) | Sensitivity (95% UI) | People who have an AUD and a positive AUDIT score [per 100 people screened] (95% UI) | People who do not have an AUD and a positive AUDIT score [per 100 people screened] (95% UI) | Number of people needed to screen to treat one AUD case (95% UI) |
|------------|-------|-----------------------------|-----------------------|-----------------|-------------|----------------------|----------------------|--------------------------------------------------------------------------------------|---------------------------------------------------------------------------------------------|------------------------------------------------------------------|
| Bahamas    | Men   | 10                          | 9.9                   | 13              | 0.90        | 0.901                | 0.829 (0.784, 0.870) | 8.2 (6.7, 9.9)                                                                       | 9 (7.1, 10.9)                                                                               | 12 (10, 15)                                                      |
|            |       | 10                          | 9.9                   | 16              | 0.95        | 0.949                | 0.810 (0.753, 0.866) | 8 (6.5, 9.7)                                                                         | 4.6 (2.8, 6.4)                                                                              | 13 (10, 15)                                                      |
|            |       | 10                          | 9.9                   | 19              | 0.98        | 0.981                | 0.792 (0.719, 0.861) | 7.8 (6.4, 9.5)                                                                       | 1.7 (0.5, 3.3)                                                                              | 13 (11, 16)                                                      |
|            | Women | 10                          | 3.7                   | 7               | 0.90        | 0.889                | 0.848 (0.812, 0.881) | 3.2 (2.3, 4.3)                                                                       | 10.7 (8.5, 13.2)                                                                            | 32 (23, 43)                                                      |
|            |       | 10                          | 3.7                   | 9               | 0.95        | 0.944                | 0.810 (0.764, 0.853) | 3 (2.2, 4.2)                                                                         | 5.4 (3.5, 7.6)                                                                              | 33 (24, 45)                                                      |
|            |       | 10                          | 3.7                   | 11              | 0.98        | 0.979                | 0.773 (0.711, 0.831) | 2.9 (2.1, 4.0)                                                                       | 2.1 (0.7, 3.9)                                                                              | 35 (25, 48)                                                      |
| Bahrain    | Men   | 10                          | 2.3                   | 13              | 0.90        | 0.901                | 0.829 (0.784, 0.870) | 1.9 (1.3, 2.9)                                                                       | 9.7 (7.7, 11.8)                                                                             | 51 (34, 77)                                                      |
|            |       | 10                          | 2.3                   | 16              | 0.95        | 0.949                | 0.810 (0.753, 0.866) | 1.9 (1.3, 2.9)                                                                       | 5 (3.1, 6.9)                                                                                | 53 (35, 79)                                                      |
|            |       | 10                          | 2.3                   | 19              | 0.98        | 0.981                | 0.792 (0.719, 0.861) | 1.9 (1.2, 2.8)                                                                       | 1.9 (0.5, 3.6)                                                                              | 54 (36, 81)                                                      |
|            | Women | 10                          | 0.3                   | 7               | 0.90        | 0.889                | 0.848 (0.812, 0.881) | 0.3 (0.1, 0.9)                                                                       | 11.1 (8.8, 13.7)                                                                            | 345 (115, 1064)                                                  |
|            |       | 10                          | 0.3                   | 9               | 0.95        | 0.944                | 0.810 (0.764, 0.853) | 0.3 (0.1, 0.8)                                                                       | 5.6 (3.6, 7.9)                                                                              | 361 (121, 1104)                                                  |
|            |       | 10                          | 0.3                   | 11              | 0.98        | 0.979                | 0.773 (0.711, 0.831) | 0.3 (0.1, 0.8)                                                                       | 2.1 (0.7, 4.0)                                                                              | 378 (127, 1149)                                                  |
| Bangladesh | Men   | 10                          | 1.4                   | 13              | 0.90        | 0.901                | 0.829 (0.784, 0.870) | 1.2 (0.7, 2.0)                                                                       | 9.8 (7.8, 12.0)                                                                             | 85 (51, 146)                                                     |
|            |       | 10                          | 1.4                   | 16              | 0.95        | 0.949                | 0.810 (0.753, 0.866) | 1.1 (0.7, 1.9)                                                                       | 5 (3.1, 7.0)                                                                                | 87 (52, 150)                                                     |
|            |       | 10                          | 1.4                   | 19              | 0.98        | 0.981                | 0.792 (0.719, 0.861) | 1.1 (0.6, 1.9)                                                                       | 1.9 (0.5, 3.6)                                                                              | 89 (54, 155)                                                     |
|            | Women | 10                          | 0.3                   | 7               | 0.90        | 0.889                | 0.848 (0.812, 0.881) | 0.2 (0.1, 0.7)                                                                       | 11.1 (8.8, 13.7)                                                                            | 454 (143, 1439)                                                  |
|            |       | 10                          | 0.3                   | 9               | 0.95        | 0.944                | 0.810 (0.764, 0.853) | 0.2 (0.1, 0.7)                                                                       | 5.6 (3.6, 7.9)                                                                              | 475 (150, 1513)                                                  |
|            |       | 10                          | 0.3                   | 11              | 0.98        | 0.979                | 0.773 (0.711, 0.831) | 0.2 (0.1, 0.6)                                                                       | 2.1 (0.7, 4.1)                                                                              | 498 (157, 1594)                                                  |
| Barbados   | Men   | 10                          | 10.1                  | 13              | 0.90        | 0.901                | 0.829 (0.784, 0.870) | 8.4 (7.1, 10.0)                                                                      | 8.9 (7.1, 10.9)                                                                             | 12 (10, 14)                                                      |
|            |       | 10                          | 10.1                  | 16              | 0.95        | 0.949                | 0.810 (0.753, 0.866) | 8.2 (6.9, 9.9)                                                                       | 4.6 (2.9, 6.4)                                                                              | 12 (10, 15)                                                      |
|            |       | 10                          | 10.1                  | 19              | 0.98        | 0.981                | 0.792 (0.719, 0.861) | 8 (6.6, 9.8)                                                                         | 1.7 (0.5, 3.3)                                                                              | 12 (10, 15)                                                      |
|            | Women | 10                          | 3.7                   | 7               | 0.90        | 0.889                | 0.848 (0.812, 0.881) | 3.1 (2.2, 4.3)                                                                       | 10.7 (8.5, 13.2)                                                                            | 32 (23, 45)                                                      |

| Country | Sex   | Standard drink size (grams) | Prevalence (%) of AUD | AUDIT cut-point | Specificity | Specificity (actual) | Sensitivity (95% UI) | People who have an AUD and a positive AUDIT score [per 100 people screened] (95% UI) | People who do not have an AUD and a positive AUDIT score [per 100 people screened] (95% UI) | Number of people needed to screen to treat one AUD case (95% UI) |
|---------|-------|-----------------------------|-----------------------|-----------------|-------------|----------------------|----------------------|--------------------------------------------------------------------------------------|---------------------------------------------------------------------------------------------|------------------------------------------------------------------|
| Belarus | Men   | 10                          | 3.7                   | 9               | 0.95        | 0.944                | 0.810 (0.764, 0.853) | 3 (2.1, 4.1)                                                                         | 5.4 (3.5, 7.7)                                                                              | 34 (24, 47)                                                      |
|         |       | 10                          | 3.7                   | 11              | 0.98        | 0.979                | 0.773 (0.711, 0.831) | 2.8 (2.0, 4.0)                                                                       | 2.1 (0.7, 3.9)                                                                              | 35 (25, 49)                                                      |
|         |       | 10                          | 33.9                  | 13              | 0.90        | 0.901                | 0.829 (0.784, 0.870) | 28.1 (25.4, 30.9)                                                                    | 6.6 (5.2, 8.0)                                                                              | 4 (3, 4)                                                         |
|         | Women | 10                          | 33.9                  | 16              | 0.95        | 0.949                | 0.810 (0.753, 0.866) | 27.5 (24.5, 30.5)                                                                    | 3.4 (2.1, 4.7)                                                                              | 4 (3, 4)                                                         |
|         |       | 10                          | 33.9                  | 19              | 0.98        | 0.981                | 0.792 (0.719, 0.861) | 26.9 (23.6, 30.0)                                                                    | 1.3 (0.4, 2.4)                                                                              | 4 (3, 4)                                                         |
|         |       | 10                          | 6.2                   | 7               | 0.90        | 0.889                | 0.848 (0.812, 0.881) | 5.2 (4.0, 6.7)                                                                       | 10.4 (8.3, 12.9)                                                                            | 19 (15, 25)                                                      |
| Belgium | Men   | 10                          | 6.2                   | 9               | 0.95        | 0.944                | 0.810 (0.764, 0.853) | 5 (3.8, 6.4)                                                                         | 5.3 (3.4, 7.4)                                                                              | 20 (16, 26)                                                      |
|         |       | 10                          | 6.2                   | 11              | 0.98        | 0.979                | 0.773 (0.711, 0.831) | 4.8 (3.6, 6.1)                                                                       | 2 (0.7, 3.8)                                                                                | 21 (17, 28)                                                      |
|         |       | 10                          | 12.1                  | 13              | 0.90        | 0.901                | 0.829 (0.784, 0.870) | 10.1 (8.4, 12.0)                                                                     | 8.7 (6.9, 10.6)                                                                             | 10 (8, 12)                                                       |
|         | Women | 10                          | 12.1                  | 16              | 0.95        | 0.949                | 0.810 (0.753, 0.866) | 9.8 (8.2, 11.8)                                                                      | 4.5 (2.8, 6.2)                                                                              | 10 (9, 12)                                                       |
|         |       | 10                          | 12.1                  | 19              | 0.98        | 0.981                | 0.792 (0.719, 0.861) | 9.6 (7.9, 11.6)                                                                      | 1.7 (0.5, 3.2)                                                                              | 10 (9, 13)                                                       |
|         |       | 10                          | 4.3                   | 7               | 0.90        | 0.889                | 0.848 (0.812, 0.881) | 3.7 (2.7, 4.9)                                                                       | 10.6 (8.4, 13.1)                                                                            | 27 (20, 37)                                                      |
| Belize  | Men   | 10                          | 4.3                   | 9               | 0.95        | 0.944                | 0.810 (0.764, 0.853) | 3.5 (2.6, 4.7)                                                                       | 5.4 (3.5, 7.6)                                                                              | 29 (21, 38)                                                      |
|         |       | 10                          | 4.3                   | 11              | 0.98        | 0.979                | 0.773 (0.711, 0.831) | 3.3 (2.4, 4.5)                                                                       | 2 (0.7, 3.9)                                                                                | 30 (22, 41)                                                      |
|         |       | 10                          | 12.4                  | 13              | 0.90        | 0.901                | 0.829 (0.784, 0.870) | 10.3 (8.6, 12.2)                                                                     | 8.7 (6.9, 10.7)                                                                             | 10 (8, 12)                                                       |
|         | Women | 10                          | 12.4                  | 16              | 0.95        | 0.949                | 0.810 (0.753, 0.866) | 10 (8.4, 11.9)                                                                       | 4.4 (2.8, 6.3)                                                                              | 10 (8, 12)                                                       |
|         |       | 10                          | 12.4                  | 19              | 0.98        | 0.981                | 0.792 (0.719, 0.861) | 9.8 (8.0, 11.8)                                                                      | 1.7 (0.5, 3.2)                                                                              | 10 (9, 12)                                                       |
|         |       | 10                          | 2.4                   | 7               | 0.90        | 0.889                | 0.848 (0.812, 0.881) | 2 (1.4, 3.1)                                                                         | 10.9 (8.6, 13.4)                                                                            | 49 (33, 74)                                                      |
| Benin   | Men   | 10                          | 2.4                   | 9               | 0.95        | 0.944                | 0.810 (0.764, 0.853) | 1.9 (1.3, 2.9)                                                                       | 5.5 (3.6, 7.7)                                                                              | 52 (34, 77)                                                      |
|         |       | 10                          | 2.4                   | 11              | 0.98        | 0.979                | 0.773 (0.711, 0.831) | 1.9 (1.2, 2.8)                                                                       | 2.1 (0.7, 4.0)                                                                              | 54 (35, 81)                                                      |
|         | Men   | 10                          | 10.8                  | 13              | 0.90        | 0.901                | 0.829 (0.784, 0.870) | 9 (7.4, 10.8)                                                                        | 8.9 (7.0, 10.8)                                                                             | 11 (9, 13)                                                       |
|         |       | 10                          | 10.8                  | 16              | 0.95        | 0.949                | 0.810 (0.753, 0.866) | 8.8 (7.2, 10.6)                                                                      | 4.5 (2.8, 6.4)                                                                              | 11 (9, 14)                                                       |

| Country                          | Sex   | Standard drink size (grams) | Prevalence (%) of AUD | AUDIT cut-point | Specificity | Specificity (actual) | Sensitivity (95% UI) | People who have an AUD and a positive AUDIT score [per 100 people screened] (95% UI) | People who do not have an AUD and a positive AUDIT score [per 100 people screened] (95% UI) | Number of people needed to screen to treat one AUD case (95% UI) |
|----------------------------------|-------|-----------------------------|-----------------------|-----------------|-------------|----------------------|----------------------|--------------------------------------------------------------------------------------|---------------------------------------------------------------------------------------------|------------------------------------------------------------------|
| Bhutan                           | Women | 10                          | 10.8                  | 19              | 0.98        | 0.981                | 0.792 (0.719, 0.861) | 8.6 (7.0, 10.4)                                                                      | 1.7 (0.5, 3.3)                                                                              | 12 (10, 14)                                                      |
|                                  |       | 10                          | 2.1                   | 7               | 0.90        | 0.889                | 0.848 (0.812, 0.881) | 1.8 (1.2, 2.6)                                                                       | 10.9 (8.6, 13.4)                                                                            | 56 (38, 85)                                                      |
|                                  |       | 10                          | 2.1                   | 9               | 0.95        | 0.944                | 0.810 (0.764, 0.853) | 1.7 (1.1, 2.5)                                                                       | 5.5 (3.6, 7.8)                                                                              | 58 (40, 89)                                                      |
|                                  |       | 10                          | 2.1                   | 11              | 0.98        | 0.979                | 0.773 (0.711, 0.831) | 1.6 (1.1, 2.4)                                                                       | 2.1 (0.7, 4.0)                                                                              | 61 (42, 95)                                                      |
|                                  |       | 10                          | 3.3                   | 13              | 0.90        | 0.901                | 0.829 (0.784, 0.870) | 2.7 (1.9, 3.8)                                                                       | 9.6 (7.6, 11.7)                                                                             | 37 (26, 52)                                                      |
|                                  | Men   | 10                          | 3.3                   | 16              | 0.95        | 0.949                | 0.810 (0.753, 0.866) | 2.7 (1.9, 3.7)                                                                       | 4.9 (3.0, 6.9)                                                                              | 38 (27, 53)                                                      |
|                                  |       | 10                          | 3.3                   | 19              | 0.98        | 0.981                | 0.792 (0.719, 0.861) | 2.6 (1.8, 3.7)                                                                       | 1.9 (0.5, 3.6)                                                                              | 39 (27, 55)                                                      |
|                                  |       | 10                          | 0.6                   | 7               | 0.90        | 0.889                | 0.848 (0.812, 0.881) | 0.5 (0.2, 1.2)                                                                       | 11 (8.8, 13.7)                                                                              | 189 (85, 407)                                                    |
|                                  |       | 10                          | 0.6                   | 9               | 0.95        | 0.944                | 0.810 (0.764, 0.853) | 0.5 (0.2, 1.1)                                                                       | 5.6 (3.6, 7.9)                                                                              | 198 (89, 430)                                                    |
|                                  |       | 10                          | 0.6                   | 11              | 0.98        | 0.979                | 0.773 (0.711, 0.831) | 0.5 (0.2, 1.1)                                                                       | 2.1 (0.7, 4.0)                                                                              | 207 (92, 453)                                                    |
| Bolivia (Plurinational State of) | Men   | 10                          | 9.8                   | 13              | 0.90        | 0.901                | 0.829 (0.784, 0.870) | 8.1 (6.6, 9.7)                                                                       | 9 (7.1, 10.9)                                                                               | 12 (10, 15)                                                      |
|                                  |       | 10                          | 9.8                   | 16              | 0.95        | 0.949                | 0.810 (0.753, 0.866) | 7.9 (6.4, 9.5)                                                                       | 4.6 (2.9, 6.4)                                                                              | 13 (11, 16)                                                      |
|                                  |       | 10                          | 9.8                   | 19              | 0.98        | 0.981                | 0.792 (0.719, 0.861) | 7.7 (6.2, 9.4)                                                                       | 1.7 (0.5, 3.3)                                                                              | 13 (11, 16)                                                      |
|                                  | Women | 10                          | 3.7                   | 7               | 0.90        | 0.889                | 0.848 (0.812, 0.881) | 3.1 (2.2, 4.2)                                                                       | 10.7 (8.5, 13.2)                                                                            | 32 (24, 44)                                                      |
|                                  |       | 10                          | 3.7                   | 9               | 0.95        | 0.944                | 0.810 (0.764, 0.853) | 3 (2.1, 4.0)                                                                         | 5.4 (3.5, 7.6)                                                                              | 34 (25, 47)                                                      |
|                                  |       | 10                          | 3.7                   | 11              | 0.98        | 0.979                | 0.773 (0.711, 0.831) | 2.8 (2.0, 3.9)                                                                       | 2.1 (0.7, 3.9)                                                                              | 35 (26, 50)                                                      |
| Bosnia and Herzegovina           | Men   | 10                          | 9.8                   | 13              | 0.90        | 0.901                | 0.829 (0.784, 0.870) | 8.2 (6.6, 9.9)                                                                       | 9 (7.1, 10.9)                                                                               | 12 (10, 15)                                                      |
|                                  |       | 10                          | 9.8                   | 16              | 0.95        | 0.949                | 0.810 (0.753, 0.866) | 8 (6.5, 9.7)                                                                         | 4.6 (2.9, 6.5)                                                                              | 13 (10, 15)                                                      |
|                                  |       | 10                          | 9.8                   | 19              | 0.98        | 0.981                | 0.792 (0.719, 0.861) | 7.8 (6.3, 9.5)                                                                       | 1.7 (0.5, 3.3)                                                                              | 13 (11, 16)                                                      |
|                                  | Women | 10                          | 2.2                   | 7               | 0.90        | 0.889                | 0.848 (0.812, 0.881) | 1.8 (1.2, 2.7)                                                                       | 10.9 (8.6, 13.4)                                                                            | 54 (37, 85)                                                      |
|                                  |       | 10                          | 2.2                   | 9               | 0.95        | 0.944                | 0.810 (0.764, 0.853) | 1.8 (1.1, 2.6)                                                                       | 5.5 (3.6, 7.8)                                                                              | 57 (39, 90)                                                      |

| Country           | Sex   | Standard drink size (grams) | Prevalence (%) of AUD | AUDIT cut-point | Specificity | Specificity (actual) | Sensitivity (95% UI) | People who have an AUD and a positive AUDIT score [per 100 people screened] (95% UI) | People who do not have an AUD and a positive AUDIT score [per 100 people screened] (95% UI) | Number of people needed to screen to treat one AUD case (95% UI) |
|-------------------|-------|-----------------------------|-----------------------|-----------------|-------------|----------------------|----------------------|--------------------------------------------------------------------------------------|---------------------------------------------------------------------------------------------|------------------------------------------------------------------|
| Botswana          | Men   | 10                          | 2.2                   | 11              | 0.98        | 0.979                | 0.773 (0.711, 0.831) | 1.7 (1.1, 2.5)                                                                       | 2.1 (0.7, 4.0)                                                                              | 60 (41, 95)                                                      |
|                   |       | 10                          | 12.5                  | 13              | 0.90        | 0.901                | 0.829 (0.784, 0.870) | 10.3 (8.7, 12.3)                                                                     | 8.7 (6.9, 10.6)                                                                             | 10 (8, 12)                                                       |
|                   |       | 10                          | 12.5                  | 16              | 0.95        | 0.949                | 0.810 (0.753, 0.866) | 10.1 (8.5, 12.2)                                                                     | 4.4 (2.8, 6.2)                                                                              | 10 (8, 12)                                                       |
|                   | Women | 10                          | 12.5                  | 19              | 0.98        | 0.981                | 0.792 (0.719, 0.861) | 9.9 (8.2, 11.9)                                                                      | 1.7 (0.5, 3.2)                                                                              | 10 (8, 12)                                                       |
|                   |       | 10                          | 1.9                   | 7               | 0.90        | 0.889                | 0.848 (0.812, 0.881) | 1.6 (1.0, 2.4)                                                                       | 10.9 (8.6, 13.5)                                                                            | 63 (41, 101)                                                     |
|                   |       | 10                          | 1.9                   | 9               | 0.95        | 0.944                | 0.810 (0.764, 0.853) | 1.5 (1.0, 2.3)                                                                       | 5.5 (3.6, 7.8)                                                                              | 66 (43, 105)                                                     |
| Brazil            | Men   | 10                          | 1.9                   | 11              | 0.98        | 0.979                | 0.773 (0.711, 0.831) | 1.4 (0.9, 2.3)                                                                       | 2.1 (0.7, 4.0)                                                                              | 69 (44, 110)                                                     |
|                   |       | 10                          | 6.9                   | 13              | 0.90        | 0.901                | 0.829 (0.784, 0.870) | 5.7 (4.5, 7.2)                                                                       | 9.2 (7.4, 11.3)                                                                             | 17 (14, 22)                                                      |
|                   |       | 10                          | 6.9                   | 16              | 0.95        | 0.949                | 0.810 (0.753, 0.866) | 5.6 (4.4, 7.1)                                                                       | 4.7 (2.9, 6.6)                                                                              | 18 (14, 23)                                                      |
|                   | Women | 10                          | 6.9                   | 19              | 0.98        | 0.981                | 0.792 (0.719, 0.861) | 5.5 (4.3, 6.9)                                                                       | 1.8 (0.5, 3.4)                                                                              | 18 (15, 24)                                                      |
|                   |       | 10                          | 1.6                   | 7               | 0.90        | 0.889                | 0.848 (0.812, 0.881) | 1.4 (0.8, 2.2)                                                                       | 10.9 (8.6, 13.5)                                                                            | 74 (45, 118)                                                     |
|                   |       | 10                          | 1.6                   | 9               | 0.95        | 0.944                | 0.810 (0.764, 0.853) | 1.3 (0.8, 2.2)                                                                       | 5.5 (3.6, 7.8)                                                                              | 77 (46, 126)                                                     |
| Brunei Darussalam | Men   | 10                          | 1.6                   | 11              | 0.98        | 0.979                | 0.773 (0.711, 0.831) | 1.2 (0.8, 2.1)                                                                       | 2.1 (0.7, 4.0)                                                                              | 81 (49, 133)                                                     |
|                   |       | 10                          | 3.8                   | 13              | 0.90        | 0.901                | 0.829 (0.784, 0.870) | 3.1 (2.3, 4.2)                                                                       | 9.6 (7.6, 11.7)                                                                             | 32 (24, 44)                                                      |
|                   |       | 10                          | 3.8                   | 16              | 0.95        | 0.949                | 0.810 (0.753, 0.866) | 3.1 (2.2, 4.2)                                                                       | 4.9 (3.1, 6.9)                                                                              | 33 (24, 45)                                                      |
|                   | Women | 10                          | 3.8                   | 19              | 0.98        | 0.981                | 0.792 (0.719, 0.861) | 3 (2.2, 4.1)                                                                         | 1.8 (0.5, 3.5)                                                                              | 34 (25, 46)                                                      |
|                   |       | 10                          | 0.7                   | 7               | 0.90        | 0.889                | 0.848 (0.812, 0.881) | 0.6 (0.3, 1.2)                                                                       | 11 (8.7, 13.6)                                                                              | 165 (82, 324)                                                    |
|                   |       | 10                          | 0.7                   | 9               | 0.95        | 0.944                | 0.810 (0.764, 0.853) | 0.6 (0.3, 1.2)                                                                       | 5.6 (3.6, 7.9)                                                                              | 172 (86, 339)                                                    |
| Bulgaria          | Men   | 10                          | 0.7                   | 11              | 0.98        | 0.979                | 0.773 (0.711, 0.831) | 0.6 (0.3, 1.1)                                                                       | 2.1 (0.7, 4.0)                                                                              | 181 (90, 355)                                                    |
|                   |       | 13                          | 12.2                  | 12              | 0.90        | 0.91                 | 0.784 (0.738, 0.826) | 9.6 (8.1, 11.4)                                                                      | 7.9 (6.2, 9.9)                                                                              | 10 (9, 12)                                                       |
|                   |       | 13                          | 12.2                  | 14              | 0.95        | 0.944                | 0.769 (0.714, 0.821) | 9.4 (7.9, 11.2)                                                                      | 5 (3.3, 6.8)                                                                                | 11 (9, 13)                                                       |
|                   |       | 13                          | 12.2                  | 17              | 0.98        | 0.979                | 0.749 (0.676, 0.815) | 9.2 (7.6, 11.0)                                                                      | 1.9 (0.6, 3.6)                                                                              | 11 (9, 13)                                                       |

| Country      | Sex   | Standard drink size (grams) | Prevalence (%) of AUD | AUDIT cut-point | Specificity | Specificity (actual) | Sensitivity (95% UI) | People who have an AUD and a positive AUDIT score [per 100 people screened] (95% UI) | People who do not have an AUD and a positive AUDIT score [per 100 people screened] (95% UI) | Number of people needed to screen to treat one AUD case (95% UI) |
|--------------|-------|-----------------------------|-----------------------|-----------------|-------------|----------------------|----------------------|--------------------------------------------------------------------------------------|---------------------------------------------------------------------------------------------|------------------------------------------------------------------|
| Burkina Faso | Women | 13                          | 1.9                   | 7               | 0.90        | 0.893                | 0.774 (0.734, 0.809) | 1.5 (0.9, 2.4)                                                                       | 10.5 (8.6, 12.5)                                                                            | 68 (42, 109)                                                     |
|              |       | 13                          | 1.9                   | 9               | 0.95        | 0.947                | 0.731 (0.682, 0.777) | 1.4 (0.9, 2.3)                                                                       | 5.2 (3.5, 7.0)                                                                              | 72 (44, 116)                                                     |
|              |       | 13                          | 1.9                   | 11              | 0.98        | 0.981                | 0.690 (0.625, 0.751) | 1.3 (0.8, 2.1)                                                                       | 1.9 (0.7, 3.5)                                                                              | 76 (48, 122)                                                     |
|              | Men   | 10                          | 3.4                   | 13              | 0.90        | 0.901                | 0.829 (0.784, 0.870) | 2.8 (2.0, 3.9)                                                                       | 9.6 (7.6, 11.7)                                                                             | 35 (26, 50)                                                      |
|              |       | 10                          | 3.4                   | 16              | 0.95        | 0.949                | 0.810 (0.753, 0.866) | 2.8 (2.0, 3.8)                                                                       | 4.9 (3.1, 6.9)                                                                              | 36 (26, 51)                                                      |
|              |       | 10                          | 3.4                   | 19              | 0.98        | 0.981                | 0.792 (0.719, 0.861) | 2.7 (1.9, 3.7)                                                                       | 1.9 (0.5, 3.6)                                                                              | 37 (27, 53)                                                      |
|              | Women | 10                          | 0.3                   | 7               | 0.90        | 0.889                | 0.848 (0.812, 0.881) | 0.3 (0.1, 0.8)                                                                       | 11.1 (8.8, 13.7)                                                                            | 392 (125, 1112)                                                  |
|              |       | 10                          | 0.3                   | 9               | 0.95        | 0.944                | 0.810 (0.764, 0.853) | 0.2 (0.1, 0.8)                                                                       | 5.6 (3.6, 7.9)                                                                              | 411 (130, 1178)                                                  |
|              |       | 10                          | 0.3                   | 11              | 0.98        | 0.979                | 0.773 (0.711, 0.831) | 0.2 (0.1, 0.7)                                                                       | 2.1 (0.7, 4.0)                                                                              | 430 (136, 1237)                                                  |
| Burundi      | Men   | 10                          | 11.6                  | 13              | 0.90        | 0.901                | 0.829 (0.784, 0.870) | 9.6 (8.1, 11.4)                                                                      | 8.8 (7.0, 10.7)                                                                             | 10 (9, 12)                                                       |
|              |       | 10                          | 11.6                  | 16              | 0.95        | 0.949                | 0.810 (0.753, 0.866) | 9.4 (7.8, 11.3)                                                                      | 4.5 (2.8, 6.3)                                                                              | 11 (9, 13)                                                       |
|              |       | 10                          | 11.6                  | 19              | 0.98        | 0.981                | 0.792 (0.719, 0.861) | 9.2 (7.6, 11.1)                                                                      | 1.7 (0.5, 3.3)                                                                              | 11 (9, 13)                                                       |
|              | Women | 10                          | 2.3                   | 7               | 0.90        | 0.889                | 0.848 (0.812, 0.881) | 1.9 (1.3, 2.9)                                                                       | 10.9 (8.6, 13.4)                                                                            | 52 (34, 76)                                                      |
|              |       | 10                          | 2.3                   | 9               | 0.95        | 0.944                | 0.810 (0.764, 0.853) | 1.8 (1.2, 2.8)                                                                       | 5.5 (3.5, 7.7)                                                                              | 55 (36, 80)                                                      |
|              |       | 10                          | 2.3                   | 11              | 0.98        | 0.979                | 0.773 (0.711, 0.831) | 1.7 (1.2, 2.6)                                                                       | 2.1 (0.7, 4.0)                                                                              | 57 (38, 85)                                                      |
| Cambodia     | Men   | 10                          | 8.7                   | 13              | 0.90        | 0.901                | 0.829 (0.784, 0.870) | 7.2 (5.9, 8.8)                                                                       | 9.1 (7.2, 11.1)                                                                             | 14 (11, 17)                                                      |
|              |       | 10                          | 8.7                   | 16              | 0.95        | 0.949                | 0.810 (0.753, 0.866) | 7 (5.8, 8.6)                                                                         | 4.6 (2.9, 6.5)                                                                              | 14 (12, 17)                                                      |
|              |       | 10                          | 8.7                   | 19              | 0.98        | 0.981                | 0.792 (0.719, 0.861) | 6.9 (5.6, 8.5)                                                                       | 1.8 (0.5, 3.4)                                                                              | 15 (12, 18)                                                      |
|              | Women | 10                          | 1.8                   | 7               | 0.90        | 0.889                | 0.848 (0.812, 0.881) | 1.5 (0.9, 2.5)                                                                       | 10.9 (8.6, 13.4)                                                                            | 67 (41, 111)                                                     |
|              |       | 10                          | 1.8                   | 9               | 0.95        | 0.944                | 0.810 (0.764, 0.853) | 1.4 (0.9, 2.3)                                                                       | 5.5 (3.6, 7.8)                                                                              | 70 (43, 116)                                                     |
|              |       | 10                          | 1.8                   | 11              | 0.98        | 0.979                | 0.773 (0.711, 0.831) | 1.4 (0.8, 2.2)                                                                       | 2.1 (0.7, 4.0)                                                                              | 73 (45, 122)                                                     |
| Cameroon     | Men   | 10                          | 11.8                  | 13              | 0.90        | 0.901                | 0.829 (0.784, 0.870) | 9.8 (8.2, 11.4)                                                                      | 8.8 (6.9, 10.7)                                                                             | 10 (9, 12)                                                       |

| Country                  | Sex   | Standard drink size (grams) | Prevalence (%) of AUD | AUDIT cut-point | Specificity | Specificity (actual) | Sensitivity (95% UI) | People who have an AUD and a positive AUDIT score [per 100 people screened] (95% UI) | People who do not have an AUD and a positive AUDIT score [per 100 people screened] (95% UI) | Number of people needed to screen to treat one AUD case (95% UI) |
|--------------------------|-------|-----------------------------|-----------------------|-----------------|-------------|----------------------|----------------------|--------------------------------------------------------------------------------------|---------------------------------------------------------------------------------------------|------------------------------------------------------------------|
| Canada                   | Women | 10                          | 11.8                  | 16              | 0.95        | 0.949                | 0.810 (0.753, 0.866) | 9.5 (8.0, 11.2)                                                                      | 4.5 (2.8, 6.3)                                                                              | 10 (9, 13)                                                       |
|                          |       | 10                          | 11.8                  | 19              | 0.98        | 0.981                | 0.792 (0.719, 0.861) | 9.3 (7.7, 11.1)                                                                      | 1.7 (0.5, 3.3)                                                                              | 11 (9, 13)                                                       |
|                          |       | 10                          | 2.3                   | 7               | 0.90        | 0.889                | 0.848 (0.812, 0.881) | 2 (1.3, 2.9)                                                                         | 10.9 (8.6, 13.5)                                                                            | 50 (35, 76)                                                      |
|                          |       | 10                          | 2.3                   | 9               | 0.95        | 0.944                | 0.810 (0.764, 0.853) | 1.9 (1.2, 2.8)                                                                       | 5.5 (3.6, 7.8)                                                                              | 53 (36, 80)                                                      |
|                          |       | 10                          | 2.3                   | 11              | 0.98        | 0.979                | 0.773 (0.711, 0.831) | 1.8 (1.2, 2.6)                                                                       | 2.1 (0.7, 4.0)                                                                              | 55 (38, 85)                                                      |
|                          | Men   | 13.6                        | 12.0                  | 11              | 0.90        | 0.895                | 0.781 (0.732, 0.825) | 9.3 (7.7, 11.2)                                                                      | 9.3 (7.3, 11.3)                                                                             | 11 (9, 13)                                                       |
|                          |       | 13.6                        | 12.0                  | 14              | 0.95        | 0.948                | 0.758 (0.696, 0.816) | 9.1 (7.5, 10.9)                                                                      | 4.6 (2.8, 6.5)                                                                              | 11 (9, 13)                                                       |
|                          |       | 13.6                        | 12.0                  | 17              | 0.98        | 0.982                | 0.737 (0.658, 0.809) | 8.8 (7.2, 10.7)                                                                      | 1.6 (0.4, 3.3)                                                                              | 11 (9, 14)                                                       |
|                          |       | 13.6                        | 4.1                   | 7               | 0.90        | 0.894                | 0.758 (0.710, 0.801) | 3.1 (2.3, 4.2)                                                                       | 10.2 (8.0, 12.5)                                                                            | 32 (24, 44)                                                      |
|                          |       | 13.6                        | 4.1                   | 9               | 0.95        | 0.948                | 0.714 (0.657, 0.765) | 2.9 (2.1, 3.9)                                                                       | 5 (3.2, 7.0)                                                                                | 34 (25, 47)                                                      |
| Cabo Verde               | Men   | 13.6                        | 4.1                   | 11              | 0.98        | 0.981                | 0.673 (0.603, 0.738) | 2.8 (2.0, 3.7)                                                                       | 1.8 (0.6, 3.5)                                                                              | 36 (27, 50)                                                      |
|                          |       | 10                          | 10.7                  | 13              | 0.90        | 0.901                | 0.829 (0.784, 0.870) | 8.9 (7.4, 10.6)                                                                      | 8.9 (7.1, 10.9)                                                                             | 11 (9, 14)                                                       |
|                          |       | 10                          | 10.7                  | 16              | 0.95        | 0.949                | 0.810 (0.753, 0.866) | 8.7 (7.2, 10.4)                                                                      | 4.5 (2.8, 6.4)                                                                              | 12 (10, 14)                                                      |
|                          |       | 10                          | 10.7                  | 19              | 0.98        | 0.981                | 0.792 (0.719, 0.861) | 8.5 (7.0, 10.2)                                                                      | 1.7 (0.5, 3.3)                                                                              | 12 (10, 14)                                                      |
|                          |       | 10                          | 2.0                   | 7               | 0.90        | 0.889                | 0.848 (0.812, 0.881) | 1.7 (1.1, 2.6)                                                                       | 10.9 (8.6, 13.5)                                                                            | 58 (38, 91)                                                      |
|                          | Women | 10                          | 2.0                   | 9               | 0.95        | 0.944                | 0.810 (0.764, 0.853) | 1.6 (1.0, 2.5)                                                                       | 5.5 (3.6, 7.8)                                                                              | 61 (40, 96)                                                      |
|                          |       | 10                          | 2.0                   | 11              | 0.98        | 0.979                | 0.773 (0.711, 0.831) | 1.6 (1.0, 2.4)                                                                       | 2.1 (0.7, 4.0)                                                                              | 64 (41, 101)                                                     |
|                          |       | 10                          | 6.8                   | 13              | 0.90        | 0.901                | 0.829 (0.784, 0.870) | 5.7 (4.5, 7.1)                                                                       | 9.3 (7.4, 11.3)                                                                             | 18 (14, 22)                                                      |
|                          |       | 10                          | 6.8                   | 16              | 0.95        | 0.949                | 0.810 (0.753, 0.866) | 5.5 (4.3, 6.9)                                                                       | 4.7 (3.0, 6.6)                                                                              | 18 (14, 23)                                                      |
|                          |       | 10                          | 6.8                   | 19              | 0.98        | 0.981                | 0.792 (0.719, 0.861) | 5.4 (4.2, 6.9)                                                                       | 1.8 (0.5, 3.5)                                                                              | 19 (15, 24)                                                      |
| Central African Republic | Women | 10                          | 0.9                   | 7               | 0.90        | 0.889                | 0.848 (0.812, 0.881) | 0.7 (0.4, 1.4)                                                                       | 11 (8.7, 13.6)                                                                              | 135 (70, 251)                                                    |
|                          |       | 10                          | 0.9                   | 9               | 0.95        | 0.944                | 0.810 (0.764, 0.853) | 0.7 (0.4, 1.4)                                                                       | 5.6 (3.6, 7.8)                                                                              | 142 (74, 265)                                                    |

| Country  | Sex   | Standard drink size (grams) | Prevalence (%) of AUD | AUDIT cut-point | Specificity | Specificity (actual) | Sensitivity (95% UI) | People who have an AUD and a positive AUDIT score [per 100 people screened] (95% UI) | People who do not have an AUD and a positive AUDIT score [per 100 people screened] (95% UI) | Number of people needed to screen to treat one AUD case (95% UI) |            |             |              |              |
|----------|-------|-----------------------------|-----------------------|-----------------|-------------|----------------------|----------------------|--------------------------------------------------------------------------------------|---------------------------------------------------------------------------------------------|------------------------------------------------------------------|------------|-------------|--------------|--------------|
| Chad     | Men   | 10                          | 0.9                   | 11              | 0.98        | 0.979                | 0.773 (0.711, 0.831) | 0.7                                                                                  | (0.4, 1.3)                                                                                  | 2.1                                                              | (0.7, 4.0) | 149         | (78, 280)    |              |
|          |       | 10                          | 1.4                   | 13              | 0.90        | 0.901                | 0.829                | (0.784, 0.870)                                                                       | 1.2                                                                                         | (0.7, 2.0)                                                       | 9.8        | (7.8, 11.9) | 83           | (51, 139)    |
|          |       | 10                          | 1.4                   | 16              | 0.95        | 0.949                | 0.810                | (0.753, 0.866)                                                                       | 1.2                                                                                         | (0.7, 1.9)                                                       | 5          | (3.1, 7.0)  | 85           | (51, 143)    |
|          | Women | 10                          | 1.4                   | 19              | 0.98        | 0.981                | 0.792                | (0.719, 0.861)                                                                       | 1.1                                                                                         | (0.7, 1.9)                                                       | 1.9        | (0.5, 3.6)  | 87           | (53, 146)    |
|          |       | 10                          | 0.0                   | 7               | 0.90        | 0.889                | 0.848                | (0.812, 0.881)                                                                       | <0.1                                                                                        | (<0.1, 0.7)                                                      | 11.1       | (8.8, 13.7) | 3056         | (138, 65784) |
|          |       | 10                          | 0.0                   | 9               | 0.95        | 0.944                | 0.810                | (0.764, 0.853)                                                                       | <0.1                                                                                        | (<0.1, 0.7)                                                      | 5.6        | (3.6, 7.9)  | 3202         | (145, 69223) |
| Chile    | Men   | 10                          | 0.0                   | 11              | 0.98        | 0.979                | 0.773 (0.711, 0.831) | <0.1                                                                                 | (<0.1, 0.7)                                                                                 | 2.1                                                              | (0.7, 4.1) | 3354        | (153, 72923) |              |
|          |       | 14                          | 10.3                  | 11              | 0.90        | 0.899                | 0.773                | (0.717, 0.823)                                                                       | 8                                                                                           | (6.5, 9.6)                                                       | 9.1        | (6.9, 11.3) | 13           | (10, 15)     |
|          |       | 14                          | 10.3                  | 14              | 0.95        | 0.951                | 0.750                | (0.683, 0.814)                                                                       | 7.7                                                                                         | (6.2, 9.4)                                                       | 4.4        | (2.6, 6.6)  | 13           | (11, 16)     |
|          | Women | 14                          | 10.3                  | 17              | 0.98        | 0.983                | 0.729                | (0.646, 0.806)                                                                       | 7.5                                                                                         | (6.0, 9.2)                                                       | 1.5        | (0.3, 3.3)  | 13           | (11, 17)     |
|          |       | 14                          | 1.9                   | 7               | 0.90        | 0.895                | 0.748                | (0.691, 0.797)                                                                       | 1.4                                                                                         | (0.8, 2.1)                                                       | 10.3       | (7.8, 13.0) | 72           | (47, 121)    |
|          |       | 14                          | 1.9                   | 9               | 0.95        | 0.948                | 0.703                | (0.640, 0.758)                                                                       | 1.3                                                                                         | (0.8, 2.0)                                                       | 5.1        | (3.1, 7.4)  | 77           | (49, 129)    |
| China    | Men   | 14                          | 1.9                   | 11              | 0.98        | 0.981                | 0.661                | (0.584, 0.730)                                                                       | 1.2                                                                                         | (0.7, 1.9)                                                       | 1.8        | (0.6, 3.6)  | 82           | (52, 135)    |
|          |       | 10                          | 8.4                   | 13              | 0.90        | 0.901                | 0.829                | (0.784, 0.870)                                                                       | 7                                                                                           | (5.6, 8.4)                                                       | 9.1        | (7.2, 11.1) | 14           | (12, 18)     |
|          |       | 10                          | 8.4                   | 16              | 0.95        | 0.949                | 0.810                | (0.753, 0.866)                                                                       | 6.8                                                                                         | (5.5, 8.3)                                                       | 4.6        | (2.9, 6.5)  | 15           | (12, 18)     |
|          | Women | 10                          | 8.4                   | 19              | 0.98        | 0.981                | 0.792                | (0.719, 0.861)                                                                       | 6.7                                                                                         | (5.4, 8.1)                                                       | 1.8        | (0.5, 3.4)  | 15           | (12, 19)     |
|          |       | 10                          | 0.2                   | 7               | 0.90        | 0.889                | 0.848                | (0.812, 0.881)                                                                       | 0.2                                                                                         | (<0.1, 0.7)                                                      | 11.1       | (8.8, 13.7) | 590          | (137, 2335)  |
|          |       | 10                          | 0.2                   | 9               | 0.95        | 0.944                | 0.810                | (0.764, 0.853)                                                                       | 0.2                                                                                         | (<0.1, 0.7)                                                      | 5.6        | (3.6, 7.9)  | 618          | (143, 2452)  |
| Colombia | Men   | 10                          | 0.2                   | 11              | 0.98        | 0.979                | 0.773 (0.711, 0.831) | 0.2                                                                                  | (<0.1, 0.7)                                                                                 | 2.1                                                              | (0.7, 4.0) | 647         | (150, 2582)  |              |
|          |       | 10                          | 10.4                  | 13              | 0.90        | 0.901                | 0.829                | (0.784, 0.870)                                                                       | 8.7                                                                                         | (7.2, 10.5)                                                      | 8.9        | (7.1, 10.8) | 12           | (10, 14)     |
|          |       | 10                          | 10.4                  | 16              | 0.95        | 0.949                | 0.810                | (0.753, 0.866)                                                                       | 8.5                                                                                         | (7.0, 10.3)                                                      | 4.5        | (2.8, 6.3)  | 12           | (10, 14)     |
|          |       | 10                          | 10.4                  | 19              | 0.98        | 0.981                | 0.792                | (0.719, 0.861)                                                                       | 8.3                                                                                         | (6.7, 10.0)                                                      | 1.7        | (0.5, 3.3)  | 12           | (10, 15)     |



| Country      | Sex   | Standard drink size (grams) | Prevalence (%) of AUD | AUDIT cut-point | Specificity | Specificity (actual) | Sensitivity (95% UI) | People who have an AUD and a positive AUDIT score [per 100 people screened] (95% UI) | People who do not have an AUD and a positive AUDIT score [per 100 people screened] (95% UI) | Number of people needed to screen to treat one AUD case (95% UI) |
|--------------|-------|-----------------------------|-----------------------|-----------------|-------------|----------------------|----------------------|--------------------------------------------------------------------------------------|---------------------------------------------------------------------------------------------|------------------------------------------------------------------|
| Comoros      | Women | 10                          | 3.8                   | 7               | 0.90        | 0.889                | 0.848 (0.812, 0.881) | 3.2 (2.4, 4.6)                                                                       | 10.7 (8.4, 13.2)                                                                            | 31 (22, 42)                                                      |
|              |       | 10                          | 3.8                   | 9               | 0.95        | 0.944                | 0.810 (0.764, 0.853) | 3.1 (2.3, 4.3)                                                                       | 5.4 (3.5, 7.6)                                                                              | 32 (23, 44)                                                      |
|              |       | 10                          | 3.8                   | 11              | 0.98        | 0.979                | 0.773 (0.711, 0.831) | 3 (2.1, 4.2)                                                                         | 2.1 (0.7, 3.9)                                                                              | 34 (24, 47)                                                      |
|              | Men   | 10                          | 1.4                   | 13              | 0.90        | 0.901                | 0.829 (0.784, 0.870) | 1.2 (0.7, 2.0)                                                                       | 9.8 (7.8, 11.9)                                                                             | 83 (50, 135)                                                     |
|              |       | 10                          | 1.4                   | 16              | 0.95        | 0.949                | 0.810 (0.753, 0.866) | 1.2 (0.7, 2.0)                                                                       | 5 (3.1, 7.0)                                                                                | 85 (51, 139)                                                     |
|              |       | 10                          | 1.4                   | 19              | 0.98        | 0.981                | 0.792 (0.719, 0.861) | 1.1 (0.7, 1.9)                                                                       | 1.9 (0.5, 3.6)                                                                              | 87 (53, 142)                                                     |
| Congo        | Women | 10                          | 0.0                   | 7               | 0.90        | 0.889                | 0.848 (0.812, 0.881) | <0.1 (<0.1, 0.7)                                                                     | 11.1 (8.8, 13.7)                                                                            | 3263 (150, 73218)                                                |
|              |       | 10                          | 0.0                   | 9               | 0.95        | 0.944                | 0.810 (0.764, 0.853) | <0.1 (<0.1, 0.6)                                                                     | 5.6 (3.6, 7.9)                                                                              | 3418 (158, 75836)                                                |
|              |       | 10                          | 0.0                   | 11              | 0.98        | 0.979                | 0.773 (0.711, 0.831) | <0.1 (<0.1, 0.6)                                                                     | 2.1 (0.7, 4.1)                                                                              | 3581 (164, 78631)                                                |
|              | Men   | 10                          | 3.8                   | 13              | 0.90        | 0.901                | 0.829 (0.784, 0.870) | 3.2 (2.3, 4.2)                                                                       | 9.6 (7.6, 11.6)                                                                             | 32 (24, 43)                                                      |
|              |       | 10                          | 3.8                   | 16              | 0.95        | 0.949                | 0.810 (0.753, 0.866) | 3.1 (2.3, 4.1)                                                                       | 4.9 (3.0, 6.9)                                                                              | 32 (25, 44)                                                      |
|              |       | 10                          | 3.8                   | 19              | 0.98        | 0.981                | 0.792 (0.719, 0.861) | 3 (2.2, 4.0)                                                                         | 1.8 (0.5, 3.5)                                                                              | 33 (25, 46)                                                      |
| Cook Islands | Women | 10                          | 0.5                   | 7               | 0.90        | 0.889                | 0.848 (0.812, 0.881) | 0.4 (0.2, 1.0)                                                                       | 11.1 (8.8, 13.7)                                                                            | 254 (105, 628)                                                   |
|              |       | 10                          | 0.5                   | 9               | 0.95        | 0.944                | 0.810 (0.764, 0.853) | 0.4 (0.2, 0.9)                                                                       | 5.6 (3.6, 7.9)                                                                              | 266 (111, 663)                                                   |
|              |       | 10                          | 0.5                   | 11              | 0.98        | 0.979                | 0.773 (0.711, 0.831) | 0.4 (0.1, 0.9)                                                                       | 2.1 (0.7, 4.0)                                                                              | 278 (117, 700)                                                   |
|              | Men   | 10                          | 8.9                   | 13              | 0.90        | 0.901                | 0.829 (0.784, 0.870) | 7.4 (6.0, 9.1)                                                                       | 9 (7.2, 11.1)                                                                               | 14 (11, 17)                                                      |
|              |       | 10                          | 8.9                   | 16              | 0.95        | 0.949                | 0.810 (0.753, 0.866) | 7.2 (5.8, 8.9)                                                                       | 4.6 (2.9, 6.5)                                                                              | 14 (11, 17)                                                      |
|              |       | 10                          | 8.9                   | 19              | 0.98        | 0.981                | 0.792 (0.719, 0.861) | 7 (5.7, 8.7)                                                                         | 1.7 (0.5, 3.4)                                                                              | 14 (11, 17)                                                      |
| Women        | 10    | 1.8                         | 7                     | 0.90            | 0.889       | 0.848 (0.812, 0.881) | 1.5 (0.9, 2.4)       | 10.9 (8.6, 13.5)                                                                     | 67 (43, 108)                                                                                |                                                                  |
|              | 10    | 1.8                         | 9                     | 0.95            | 0.944       | 0.810 (0.764, 0.853) | 1.4 (0.9, 2.3)       | 5.5 (3.6, 7.8)                                                                       | 70 (44, 114)                                                                                |                                                                  |
|              | 10    | 1.8                         | 11                    | 0.98            | 0.979       | 0.773 (0.711, 0.831) | 1.4 (0.8, 2.2)       | 2.1 (0.7, 4.0)                                                                       | 73 (46, 120)                                                                                |                                                                  |
| Costa Rica   | Men   | 10                          | 10.4                  | 13              | 0.90        | 0.901                | 0.829 (0.784, 0.870) | 8.6 (7.2, 10.4)                                                                      | 8.9 (7.1, 10.8)                                                                             | 12 (10, 14)                                                      |

| Country | Sex   | Standard drink size (grams) | Prevalence (%) of AUD | AUDIT cut-point | Specificity | Specificity (actual) | Sensitivity (95% UI) | People who have an AUD and a positive AUDIT score [per 100 people screened] (95% UI) | People who do not have an AUD and a positive AUDIT score [per 100 people screened] (95% UI) | Number of people needed to screen to treat one AUD case (95% UI) |             |
|---------|-------|-----------------------------|-----------------------|-----------------|-------------|----------------------|----------------------|--------------------------------------------------------------------------------------|---------------------------------------------------------------------------------------------|------------------------------------------------------------------|-------------|
| Croatia | Women | 10                          | 10.4                  | 16              | 0.95        | 0.949                | 0.810 (0.753, 0.866) | 8.4 (7.0, 10.2)                                                                      | 4.5 (2.9, 6.4)                                                                              | 12 (10, 14)                                                      |             |
|         |       | 10                          | 10.4                  | 19              | 0.98        | 0.981                | 0.792 (0.719, 0.861) | 8.2 (6.7, 10.0)                                                                      | 1.7 (0.5, 3.3)                                                                              | 12 (10, 15)                                                      |             |
|         |       | 10                          | 3.4                   | 7               | 0.90        | 0.889                | 0.848 (0.812, 0.881) | 2.9 (2.1, 4.0)                                                                       | 10.7 (8.5, 13.3)                                                                            | 35 (25, 49)                                                      |             |
|         |       | 10                          | 3.4                   | 9               | 0.95        | 0.944                | 0.810 (0.764, 0.853) | 2.7 (2.0, 3.8)                                                                       | 5.4 (3.5, 7.6)                                                                              | 36 (27, 51)                                                      |             |
|         |       | 10                          | 3.4                   | 11              | 0.98        | 0.979                | 0.773 (0.711, 0.831) | 2.6 (1.9, 3.6)                                                                       | 2.1 (0.7, 3.9)                                                                              | 38 (28, 53)                                                      |             |
|         | Men   | 10                          | 9.8                   | 13              | 0.90        | 0.901                | 0.829 (0.784, 0.870) | 8.1 (6.6, 9.8)                                                                       | 9 (7.1, 10.9)                                                                               | 12 (10, 15)                                                      |             |
|         |       | 10                          | 9.8                   | 16              | 0.95        | 0.949                | 0.810 (0.753, 0.866) | 7.9 (6.4, 9.6)                                                                       | 4.6 (2.9, 6.5)                                                                              | 13 (10, 16)                                                      |             |
|         |       | 10                          | 9.8                   | 19              | 0.98        | 0.981                | 0.792 (0.719, 0.861) | 7.8 (6.1, 9.5)                                                                       | 1.7 (0.5, 3.3)                                                                              | 13 (11, 16)                                                      |             |
|         |       | Women                       | 10                    | 2.2             | 7           | 0.90                 | 0.889                | 0.848 (0.812, 0.881)                                                                 | 1.8 (1.2, 2.8)                                                                              | 10.9 (8.6, 13.4)                                                 | 55 (36, 86) |
|         |       |                             | 10                    | 2.2             | 9           | 0.95                 | 0.944                | 0.810 (0.764, 0.853)                                                                 | 1.7 (1.1, 2.7)                                                                              | 5.5 (3.5, 7.8)                                                   | 57 (38, 90) |
| Cuba    | Men   | 10                          | 2.2                   | 11              | 0.98        | 0.979                | 0.773 (0.711, 0.831) | 1.7 (1.1, 2.5)                                                                       | 2.1 (0.7, 4.0)                                                                              | 60 (39, 93)                                                      |             |
|         |       | 10                          | 9.6                   | 13              | 0.90        | 0.901                | 0.829 (0.784, 0.870) | 8 (6.6, 9.6)                                                                         | 9 (7.1, 11.0)                                                                               | 13 (10, 15)                                                      |             |
|         |       | 10                          | 9.6                   | 16              | 0.95        | 0.949                | 0.810 (0.753, 0.866) | 7.8 (6.4, 9.4)                                                                       | 4.6 (2.9, 6.4)                                                                              | 13 (11, 16)                                                      |             |
|         |       | 10                          | 9.6                   | 19              | 0.98        | 0.981                | 0.792 (0.719, 0.861) | 7.6 (6.2, 9.2)                                                                       | 1.7 (0.5, 3.3)                                                                              | 13 (11, 16)                                                      |             |
|         |       | Women                       | 10                    | 3.6             | 7           | 0.90                 | 0.889                | 0.848 (0.812, 0.881)                                                                 | 3.1 (2.3, 4.2)                                                                              | 10.7 (8.5, 13.3)                                                 | 33 (24, 44) |
|         | 10    |                             | 3.6                   | 9               | 0.95        | 0.944                | 0.810 (0.764, 0.853) | 2.9 (2.2, 4.0)                                                                       | 5.4 (3.5, 7.6)                                                                              | 34 (25, 46)                                                      |             |
|         | Men   | 10                          | 3.6                   | 11              | 0.98        | 0.979                | 0.773 (0.711, 0.831) | 2.8 (2.1, 3.9)                                                                       | 2.1 (0.7, 3.9)                                                                              | 36 (26, 49)                                                      |             |
|         |       | 10                          | 10.5                  | 13              | 0.90        | 0.901                | 0.829 (0.784, 0.870) | 8.7 (7.2, 10.6)                                                                      | 8.9 (7.1, 10.9)                                                                             | 11 (9, 14)                                                       |             |
|         |       | 10                          | 10.5                  | 16              | 0.95        | 0.949                | 0.810 (0.753, 0.866) | 8.5 (7.0, 10.4)                                                                      | 4.5 (2.8, 6.4)                                                                              | 12 (10, 14)                                                      |             |
|         |       | 10                          | 10.5                  | 19              | 0.98        | 0.981                | 0.792 (0.719, 0.861) | 8.3 (6.8, 10.3)                                                                      | 1.7 (0.5, 3.3)                                                                              | 12 (10, 15)                                                      |             |
| Women   |       | 10                          | 3.2                   | 7               | 0.90        | 0.889                | 0.848 (0.812, 0.881) | 2.7 (1.9, 3.8)                                                                       | 10.8 (8.5, 13.3)                                                                            | 37 (26, 53)                                                      |             |
|         | 10    | 3.2                         | 9                     | 0.95            | 0.944       | 0.810 (0.764, 0.853) | 2.6 (1.8, 3.6)       | 5.4 (3.5, 7.7)                                                                       | 39 (28, 56)                                                                                 |                                                                  |             |

| Country                                 | Sex   | Standard drink size (grams) | Prevalence (%) of AUD | AUDIT cut-point | Specificity | Specificity (actual) | Sensitivity (95% UI) | People who have an AUD and a positive AUDIT score [per 100 people screened] (95% UI) | People who do not have an AUD and a positive AUDIT score [per 100 people screened] (95% UI) | Number of people needed to screen to treat one AUD case (95% UI) |
|-----------------------------------------|-------|-----------------------------|-----------------------|-----------------|-------------|----------------------|----------------------|--------------------------------------------------------------------------------------|---------------------------------------------------------------------------------------------|------------------------------------------------------------------|
| Czech Republic                          | Men   | 10                          | 3.2                   | 11              | 0.98        | 0.979                | 0.773 (0.711, 0.831) | 2.4 (1.7, 3.4)                                                                       | 2.1 (0.7, 3.9)                                                                              | 41 (29, 59)                                                      |
|                                         |       | 16                          | 10.6                  | 10              | 0.90        | 0.896                | 0.744 (0.661, 0.821) | 7.9 (6.4, 9.7)                                                                       | 9.3 (6.3, 12.4)                                                                             | 13 (10, 16)                                                      |
|                                         |       | 16                          | 10.6                  | 13              | 0.95        | 0.951                | 0.719 (0.625, 0.808) | 7.6 (6.1, 9.5)                                                                       | 4.4 (2.1, 7.1)                                                                              | 13 (11, 16)                                                      |
|                                         | Women | 16                          | 10.6                  | 16              | 0.98        | 0.984                | 0.697 (0.590, 0.795) | 7.4 (5.7, 9.3)                                                                       | 1.4 (0.1, 3.5)                                                                              | 14 (11, 17)                                                      |
|                                         |       | 16                          | 1.7                   | 7               | 0.90        | 0.897                | 0.692 (0.594, 0.771) | 1.2 (0.7, 1.8)                                                                       | 10.1 (6.4, 14.7)                                                                            | 86 (55, 145)                                                     |
|                                         |       | 16                          | 1.7                   | 9               | 0.95        | 0.95                 | 0.645 (0.542, 0.729) | 1.1 (0.6, 1.7)                                                                       | 4.9 (2.2, 8.3)                                                                              | 92 (58, 158)                                                     |
| Cote d'Ivoire                           | Men   | 16                          | 1.7                   | 11              | 0.98        | 0.983                | 0.601 (0.494, 0.697) | 1 (0.6, 1.6)                                                                         | 1.7 (0.2, 4.4)                                                                              | 99 (62, 169)                                                     |
|                                         |       | 10                          | 15.6                  | 13              | 0.90        | 0.901                | 0.829 (0.784, 0.870) | 12.9 (11.2, 15.1)                                                                    | 8.4 (6.6, 10.2)                                                                             | 8 (7, 9)                                                         |
|                                         |       | 10                          | 15.6                  | 16              | 0.95        | 0.949                | 0.810 (0.753, 0.866) | 12.6 (10.8, 14.9)                                                                    | 4.3 (2.7, 6.0)                                                                              | 8 (7, 9)                                                         |
|                                         | Women | 10                          | 15.6                  | 19              | 0.98        | 0.981                | 0.792 (0.719, 0.861) | 12.3 (10.5, 14.7)                                                                    | 1.6 (0.5, 3.1)                                                                              | 8 (7, 10)                                                        |
|                                         |       | 10                          | 4.1                   | 7               | 0.90        | 0.889                | 0.848 (0.812, 0.881) | 3.5 (2.6, 4.7)                                                                       | 10.7 (8.4, 13.1)                                                                            | 28 (21, 39)                                                      |
|                                         |       | 10                          | 4.1                   | 9               | 0.95        | 0.944                | 0.810 (0.764, 0.853) | 3.4 (2.5, 4.5)                                                                       | 5.4 (3.5, 7.6)                                                                              | 30 (22, 41)                                                      |
| Korea (Democratic People's Republic of) | Men   | 10                          | 4.1                   | 11              | 0.98        | 0.979                | 0.773 (0.711, 0.831) | 3.2 (2.3, 4.3)                                                                       | 2 (0.7, 3.9)                                                                                | 31 (23, 43)                                                      |
|                                         |       | 10                          | 6.2                   | 13              | 0.90        | 0.901                | 0.829 (0.784, 0.870) | 5.2 (3.9, 6.5)                                                                       | 9.3 (7.4, 11.3)                                                                             | 19 (15, 25)                                                      |
|                                         |       | 10                          | 6.2                   | 16              | 0.95        | 0.949                | 0.810 (0.753, 0.866) | 5 (3.8, 6.3)                                                                         | 4.8 (3.0, 6.7)                                                                              | 20 (16, 26)                                                      |
|                                         | Women | 10                          | 6.2                   | 19              | 0.98        | 0.981                | 0.792 (0.719, 0.861) | 4.9 (3.7, 6.2)                                                                       | 1.8 (0.5, 3.5)                                                                              | 20 (16, 27)                                                      |
|                                         |       | 10                          | 1.0                   | 7               | 0.90        | 0.889                | 0.848 (0.812, 0.881) | 0.9 (0.5, 1.7)                                                                       | 11 (8.7, 13.6)                                                                              | 112 (60, 201)                                                    |
|                                         |       | 10                          | 1.0                   | 9               | 0.95        | 0.944                | 0.810 (0.764, 0.853) | 0.8 (0.5, 1.6)                                                                       | 5.5 (3.6, 7.8)                                                                              | 118 (63, 211)                                                    |
| Congo (Democratic Republic of the)      | Men   | 10                          | 1.0                   | 11              | 0.98        | 0.979                | 0.773 (0.711, 0.831) | 0.8 (0.4, 1.5)                                                                       | 2.1 (0.7, 4.0)                                                                              | 123 (67, 223)                                                    |
|                                         |       | 10                          | 9.1                   | 13              | 0.90        | 0.901                | 0.829 (0.784, 0.870) | 7.6 (6.1, 9.1)                                                                       | 9 (7.1, 11.0)                                                                               | 13 (11, 16)                                                      |

| Country  | Sex   | Standard drink size (grams) | Prevalence (%) of AUD | AUDIT cut-point | Specificity | Specificity (actual) | Sensitivity (95% UI) | People who have an AUD and a positive AUDIT score [per 100 people screened] (95% UI) | People who do not have an AUD and a positive AUDIT score [per 100 people screened] (95% UI) | Number of people needed to screen to treat one AUD case (95% UI) |
|----------|-------|-----------------------------|-----------------------|-----------------|-------------|----------------------|----------------------|--------------------------------------------------------------------------------------|---------------------------------------------------------------------------------------------|------------------------------------------------------------------|
| Denmark  | Women | 10                          | 9.1                   | 16              | 0.95        | 0.949                | 0.810 (0.753, 0.866) | 7.4 (5.9, 9.0)                                                                       | 4.6 (2.9, 6.5)                                                                              | 14 (11, 17)                                                      |
|          |       | 10                          | 9.1                   | 19              | 0.98        | 0.981                | 0.792 (0.719, 0.861) | 7.2 (5.7, 8.8)                                                                       | 1.7 (0.5, 3.4)                                                                              | 14 (11, 17)                                                      |
|          |       | 10                          | 1.0                   | 7               | 0.90        | 0.889                | 0.848 (0.812, 0.881) | 0.9 (0.5, 1.6)                                                                       | 11 (8.6, 13.6)                                                                              | 113 (63, 207)                                                    |
|          |       | 10                          | 1.0                   | 9               | 0.95        | 0.944                | 0.810 (0.764, 0.853) | 0.8 (0.5, 1.5)                                                                       | 5.5 (3.6, 7.9)                                                                              | 118 (66, 216)                                                    |
|          |       | 10                          | 1.0                   | 11              | 0.98        | 0.979                | 0.773 (0.711, 0.831) | 0.8 (0.4, 1.4)                                                                       | 2.1 (0.7, 4.0)                                                                              | 124 (69, 228)                                                    |
|          | Men   | 12                          | 10.9                  | 12              | 0.90        | 0.9                  | 0.802 (0.763, 0.838) | 8.8 (7.3, 10.5)                                                                      | 8.9 (7.3, 10.6)                                                                             | 11 (10, 14)                                                      |
|          |       | 12                          | 10.9                  | 15              | 0.95        | 0.95                 | 0.781 (0.728, 0.833) | 8.5 (7.0, 10.3)                                                                      | 4.4 (2.9, 6.2)                                                                              | 12 (10, 14)                                                      |
|          |       | 12                          | 10.9                  | 18              | 0.98        | 0.982                | 0.761 (0.691, 0.830) | 8.3 (6.8, 10.1)                                                                      | 1.6 (0.5, 3.2)                                                                              | 12 (10, 15)                                                      |
|          |       | 12                          | 4.2                   | 7               | 0.90        | 0.892                | 0.800 (0.769, 0.829) | 3.4 (2.5, 4.5)                                                                       | 10.4 (8.7, 12.1)                                                                            | 30 (22, 40)                                                      |
|          |       | 12                          | 4.2                   | 9               | 0.95        | 0.946                | 0.758 (0.717, 0.797) | 3.2 (2.4, 4.3)                                                                       | 5.2 (3.7, 6.9)                                                                              | 31 (23, 42)                                                      |
| Djibouti | Men   | 12                          | 4.2                   | 11              | 0.98        | 0.98                 | 0.718 (0.660, 0.773) | 3 (2.2, 4.1)                                                                         | 1.9 (0.7, 3.4)                                                                              | 33 (25, 45)                                                      |
|          |       | 10                          | 1.4                   | 13              | 0.90        | 0.901                | 0.829 (0.784, 0.870) | 1.2 (0.7, 2.0)                                                                       | 9.8 (7.8, 11.9)                                                                             | 84 (49, 142)                                                     |
|          |       | 10                          | 1.4                   | 16              | 0.95        | 0.949                | 0.810 (0.753, 0.866) | 1.2 (0.7, 2.0)                                                                       | 5 (3.1, 7.0)                                                                                | 86 (50, 146)                                                     |
|          |       | 10                          | 1.4                   | 19              | 0.98        | 0.981                | 0.792 (0.719, 0.861) | 1.1 (0.7, 1.9)                                                                       | 1.9 (0.5, 3.6)                                                                              | 88 (51, 148)                                                     |
|          |       | 10                          | 0.2                   | 7               | 0.90        | 0.889                | 0.848 (0.812, 0.881) | 0.2 (<0.1, 0.7)                                                                      | 11.1 (8.8, 13.7)                                                                            | 523 (149, 2064)                                                  |
|          | Women | 10                          | 0.2                   | 9               | 0.95        | 0.944                | 0.810 (0.764, 0.853) | 0.2 (<0.1, 0.6)                                                                      | 5.6 (3.6, 7.9)                                                                              | 548 (155, 2142)                                                  |
|          |       | 10                          | 0.2                   | 11              | 0.98        | 0.979                | 0.773 (0.711, 0.831) | 0.2 (<0.1, 0.6)                                                                      | 2.1 (0.7, 4.0)                                                                              | 574 (162, 2258)                                                  |
|          |       | 10                          | 9.9                   | 13              | 0.90        | 0.901                | 0.829 (0.784, 0.870) | 8.2 (6.7, 9.9)                                                                       | 8.9 (7.1, 10.9)                                                                             | 12 (10, 15)                                                      |
|          |       | 10                          | 9.9                   | 16              | 0.95        | 0.949                | 0.810 (0.753, 0.866) | 8 (6.5, 9.7)                                                                         | 4.6 (2.9, 6.4)                                                                              | 12 (10, 15)                                                      |
|          |       | 10                          | 9.9                   | 19              | 0.98        | 0.981                | 0.792 (0.719, 0.861) | 7.8 (6.4, 9.5)                                                                       | 1.7 (0.5, 3.3)                                                                              | 13 (10, 16)                                                      |
| Dominica | Women | 10                          | 3.7                   | 7               | 0.90        | 0.889                | 0.848 (0.812, 0.881) | 3.1 (2.3, 4.4)                                                                       | 10.7 (8.5, 13.2)                                                                            | 32 (23, 43)                                                      |
|          |       | 10                          | 3.7                   | 9               | 0.95        | 0.944                | 0.810 (0.764, 0.853) | 3 (2.2, 4.2)                                                                         | 5.4 (3.5, 7.7)                                                                              | 34 (24, 45)                                                      |

| Country            | Sex   | Standard drink size (grams) | Prevalence (%) of AUD | AUDIT cut-point | Specificity | Specificity (actual) | Sensitivity (95% UI) | People who have an AUD and a positive AUDIT score [per 100 people screened] (95% UI) | People who do not have an AUD and a positive AUDIT score [per 100 people screened] (95% UI) | Number of people needed to screen to treat one AUD case (95% UI) |
|--------------------|-------|-----------------------------|-----------------------|-----------------|-------------|----------------------|----------------------|--------------------------------------------------------------------------------------|---------------------------------------------------------------------------------------------|------------------------------------------------------------------|
| Dominican Republic | Men   | 10                          | 3.7                   | 11              | 0.98        | 0.979                | 0.773 (0.711, 0.831) | 2.8 (2.1, 4.0)                                                                       | 2.1 (0.7, 3.9)                                                                              | 35 (25, 48)                                                      |
|                    |       | 10                          | 9.9                   | 13              | 0.90        | 0.901                | 0.829 (0.784, 0.870) | 8.2 (6.7, 9.8)                                                                       | 8.9 (7.1, 10.9)                                                                             | 12 (10, 15)                                                      |
|                    |       | 10                          | 9.9                   | 16              | 0.95        | 0.949                | 0.810 (0.753, 0.866) | 8.1 (6.5, 9.7)                                                                       | 4.6 (2.9, 6.4)                                                                              | 12 (10, 15)                                                      |
|                    | Women | 10                          | 9.9                   | 19              | 0.98        | 0.981                | 0.792 (0.719, 0.861) | 7.9 (6.3, 9.5)                                                                       | 1.7 (0.5, 3.3)                                                                              | 13 (11, 16)                                                      |
|                    |       | 10                          | 3.7                   | 7               | 0.90        | 0.889                | 0.848 (0.812, 0.881) | 3.2 (2.3, 4.3)                                                                       | 10.7 (8.5, 13.3)                                                                            | 32 (23, 43)                                                      |
|                    |       | 10                          | 3.7                   | 9               | 0.95        | 0.944                | 0.810 (0.764, 0.853) | 3 (2.2, 4.1)                                                                         | 5.4 (3.5, 7.6)                                                                              | 33 (24, 45)                                                      |
| Ecuador            | Men   | 10                          | 3.7                   | 11              | 0.98        | 0.979                | 0.773 (0.711, 0.831) | 2.9 (2.1, 4.0)                                                                       | 2.1 (0.7, 3.9)                                                                              | 35 (25, 48)                                                      |
|                    |       | 10                          | 9.7                   | 13              | 0.90        | 0.901                | 0.829 (0.784, 0.870) | 8.1 (6.6, 9.8)                                                                       | 9 (7.1, 11.0)                                                                               | 12 (10, 15)                                                      |
|                    |       | 10                          | 9.7                   | 16              | 0.95        | 0.949                | 0.810 (0.753, 0.866) | 7.9 (6.4, 9.6)                                                                       | 4.6 (2.9, 6.4)                                                                              | 13 (10, 16)                                                      |
|                    | Women | 10                          | 9.7                   | 19              | 0.98        | 0.981                | 0.792 (0.719, 0.861) | 7.7 (6.2, 9.4)                                                                       | 1.7 (0.5, 3.3)                                                                              | 13 (11, 16)                                                      |
|                    |       | 10                          | 3.7                   | 7               | 0.90        | 0.889                | 0.848 (0.812, 0.881) | 3.1 (2.3, 4.3)                                                                       | 10.7 (8.4, 13.2)                                                                            | 32 (23, 44)                                                      |
|                    |       | 10                          | 3.7                   | 9               | 0.95        | 0.944                | 0.810 (0.764, 0.853) | 3 (2.2, 4.1)                                                                         | 5.4 (3.5, 7.6)                                                                              | 33 (24, 46)                                                      |
| Egypt              | Men   | 10                          | 3.7                   | 11              | 0.98        | 0.979                | 0.773 (0.711, 0.831) | 2.9 (2.1, 4.0)                                                                       | 2.1 (0.7, 3.9)                                                                              | 35 (25, 48)                                                      |
|                    |       | 10                          | 2.6                   | 13              | 0.90        | 0.901                | 0.829 (0.784, 0.870) | 2.1 (1.5, 3.1)                                                                       | 9.7 (7.7, 11.8)                                                                             | 47 (33, 68)                                                      |
|                    |       | 10                          | 2.6                   | 16              | 0.95        | 0.949                | 0.810 (0.753, 0.866) | 2.1 (1.4, 3.0)                                                                       | 4.9 (3.1, 6.9)                                                                              | 48 (34, 71)                                                      |
|                    | Women | 10                          | 2.6                   | 19              | 0.98        | 0.981                | 0.792 (0.719, 0.861) | 2 (1.4, 3.0)                                                                         | 1.9 (0.5, 3.6)                                                                              | 49 (34, 72)                                                      |
|                    |       | 10                          | 0.2                   | 7               | 0.90        | 0.889                | 0.848 (0.812, 0.881) | 0.2 (0.1, 0.7)                                                                       | 11.1 (8.8, 13.7)                                                                            | 510 (142, 1965)                                                  |
|                    |       | 10                          | 0.2                   | 9               | 0.95        | 0.944                | 0.810 (0.764, 0.853) | 0.2 (<0.1, 0.7)                                                                      | 5.6 (3.6, 7.9)                                                                              | 534 (147, 2056)                                                  |
| El Salvador        | Men   | 10                          | 0.2                   | 11              | 0.98        | 0.979                | 0.773 (0.711, 0.831) | 0.2 (<0.1, 0.6)                                                                      | 2.1 (0.7, 4.0)                                                                              | 560 (155, 2141)                                                  |
|                    |       | 10                          | 9.3                   | 13              | 0.90        | 0.901                | 0.829 (0.784, 0.870) | 7.7 (6.4, 9.5)                                                                       | 9 (7.1, 11.0)                                                                               | 13 (11, 16)                                                      |
|                    |       | 10                          | 9.3                   | 16              | 0.95        | 0.949                | 0.810 (0.753, 0.866) | 7.6 (6.2, 9.2)                                                                       | 4.6 (2.9, 6.5)                                                                              | 13 (11, 16)                                                      |
|                    | Women | 10                          | 9.3                   | 19              | 0.98        | 0.981                | 0.792 (0.719, 0.861) | 7.4 (6.0, 9.2)                                                                       | 1.7 (0.5, 3.3)                                                                              | 14 (11, 17)                                                      |

| Country           | Sex   | Standard drink size (grams) | Prevalence (%) of AUD | AUDIT cut-point | Specificity | Specificity (actual) | Sensitivity (95% UI) | People who have an AUD and a positive AUDIT score [per 100 people screened] (95% UI) | People who do not have an AUD and a positive AUDIT score [per 100 people screened] (95% UI) | Number of people needed to screen to treat one AUD case (95% UI) |
|-------------------|-------|-----------------------------|-----------------------|-----------------|-------------|----------------------|----------------------|--------------------------------------------------------------------------------------|---------------------------------------------------------------------------------------------|------------------------------------------------------------------|
| Equatorial Guinea | Women | 10                          | 3.6                   | 7               | 0.90        | 0.889                | 0.848 (0.812, 0.881) | 3.1 (2.2, 4.2)                                                                       | 10.7 (8.5, 13.2)                                                                            | 33 (24, 45)                                                      |
|                   |       | 10                          | 3.6                   | 9               | 0.95        | 0.944                | 0.810 (0.764, 0.853) | 2.9 (2.1, 4.0)                                                                       | 5.4 (3.5, 7.6)                                                                              | 34 (25, 47)                                                      |
|                   |       | 10                          | 3.6                   | 11              | 0.98        | 0.979                | 0.773 (0.711, 0.831) | 2.8 (2.0, 3.9)                                                                       | 2.1 (0.7, 3.9)                                                                              | 36 (26, 49)                                                      |
|                   | Men   | 10                          | 11.2                  | 13              | 0.90        | 0.901                | 0.829 (0.784, 0.870) | 9.3 (7.8, 11.2)                                                                      | 8.8 (7.0, 10.8)                                                                             | 11 (9, 13)                                                       |
|                   |       | 10                          | 11.2                  | 16              | 0.95        | 0.949                | 0.810 (0.753, 0.866) | 9.1 (7.5, 11.0)                                                                      | 4.5 (2.8, 6.4)                                                                              | 11 (9, 13)                                                       |
|                   |       | 10                          | 11.2                  | 19              | 0.98        | 0.981                | 0.792 (0.719, 0.861) | 8.9 (7.3, 10.7)                                                                      | 1.7 (0.5, 3.3)                                                                              | 11 (9, 14)                                                       |
| Eritrea           | Women | 10                          | 2.0                   | 7               | 0.90        | 0.889                | 0.848 (0.812, 0.881) | 1.7 (1.1, 2.6)                                                                       | 10.9 (8.6, 13.4)                                                                            | 59 (38, 91)                                                      |
|                   |       | 10                          | 2.0                   | 9               | 0.95        | 0.944                | 0.810 (0.764, 0.853) | 1.6 (1.1, 2.5)                                                                       | 5.5 (3.6, 7.8)                                                                              | 62 (41, 95)                                                      |
|                   |       | 10                          | 2.0                   | 11              | 0.98        | 0.979                | 0.773 (0.711, 0.831) | 1.5 (1.0, 2.4)                                                                       | 2.1 (0.7, 4.0)                                                                              | 65 (42, 100)                                                     |
|                   | Men   | 10                          | 4.1                   | 13              | 0.90        | 0.901                | 0.829 (0.784, 0.870) | 3.4 (2.4, 4.6)                                                                       | 9.5 (7.6, 11.6)                                                                             | 30 (22, 41)                                                      |
|                   |       | 10                          | 4.1                   | 16              | 0.95        | 0.949                | 0.810 (0.753, 0.866) | 3.3 (2.4, 4.5)                                                                       | 4.9 (3.0, 6.8)                                                                              | 30 (22, 42)                                                      |
|                   |       | 10                          | 4.1                   | 19              | 0.98        | 0.981                | 0.792 (0.719, 0.861) | 3.2 (2.3, 4.4)                                                                       | 1.8 (0.5, 3.5)                                                                              | 31 (23, 44)                                                      |
|                   | Women | 10                          | 0.4                   | 7               | 0.90        | 0.889                | 0.848 (0.812, 0.881) | 0.3 (0.1, 0.8)                                                                       | 11.1 (8.8, 13.7)                                                                            | 306 (120, 836)                                                   |
|                   |       | 10                          | 0.4                   | 9               | 0.95        | 0.944                | 0.810 (0.764, 0.853) | 0.3 (0.1, 0.8)                                                                       | 5.6 (3.6, 7.9)                                                                              | 321 (126, 875)                                                   |
|                   |       | 10                          | 0.4                   | 11              | 0.98        | 0.979                | 0.773 (0.711, 0.831) | 0.3 (0.1, 0.8)                                                                       | 2.1 (0.7, 4.0)                                                                              | 336 (133, 919)                                                   |
| Estonia           | Men   | 10                          | 22.2                  | 13              | 0.90        | 0.901                | 0.829 (0.784, 0.870) | 18.4 (16.3, 20.8)                                                                    | 7.7 (6.1, 9.4)                                                                              | 5 (5, 6)                                                         |
|                   |       | 10                          | 22.2                  | 16              | 0.95        | 0.949                | 0.810 (0.753, 0.866) | 17.9 (15.8, 20.5)                                                                    | 4 (2.5, 5.5)                                                                                | 6 (5, 6)                                                         |
|                   |       | 10                          | 22.2                  | 19              | 0.98        | 0.981                | 0.792 (0.719, 0.861) | 17.5 (15.3, 20.2)                                                                    | 1.5 (0.4, 2.9)                                                                              | 6 (5, 7)                                                         |
|                   | Women | 10                          | 3.8                   | 7               | 0.90        | 0.889                | 0.848 (0.812, 0.881) | 3.2 (2.3, 4.5)                                                                       | 10.7 (8.5, 13.2)                                                                            | 31 (22, 43)                                                      |
|                   |       | 10                          | 3.8                   | 9               | 0.95        | 0.944                | 0.810 (0.764, 0.853) | 3.1 (2.2, 4.3)                                                                       | 5.4 (3.5, 7.6)                                                                              | 32 (23, 45)                                                      |
|                   |       | 10                          | 3.8                   | 11              | 0.98        | 0.979                | 0.773 (0.711, 0.831) | 3 (2.1, 4.1)                                                                         | 2.1 (0.7, 3.9)                                                                              | 34 (24, 47)                                                      |
| Ethiopia          | Men   | 10                          | 4.5                   | 13              | 0.90        | 0.901                | 0.829 (0.784, 0.870) | 3.7 (2.8, 4.9)                                                                       | 9.5 (7.6, 11.6)                                                                             | 27 (20, 36)                                                      |

| Country | Sex   | Standard drink size (grams) | Prevalence (%) of AUD | AUDIT cut-point | Specificity | Specificity (actual) | Sensitivity (95% UI) | People who have an AUD and a positive AUDIT score [per 100 people screened] (95% UI) | People who do not have an AUD and a positive AUDIT score [per 100 people screened] (95% UI) | Number of people needed to screen to treat one AUD case (95% UI) |
|---------|-------|-----------------------------|-----------------------|-----------------|-------------|----------------------|----------------------|--------------------------------------------------------------------------------------|---------------------------------------------------------------------------------------------|------------------------------------------------------------------|
| Fiji    | Women | 10                          | 4.5                   | 16              | 0.95        | 0.949                | 0.810 (0.753, 0.866) | 3.6 (2.7, 4.8)                                                                       | 4.8 (3.0, 6.8)                                                                              | 27 (21, 37)                                                      |
|         |       | 10                          | 4.5                   | 19              | 0.98        | 0.981                | 0.792 (0.719, 0.861) | 3.6 (2.6, 4.7)                                                                       | 1.8 (0.5, 3.5)                                                                              | 28 (21, 39)                                                      |
|         |       | 10                          | 0.5                   | 7               | 0.90        | 0.889                | 0.848 (0.812, 0.881) | 0.4 (0.2, 1.1)                                                                       | 11.1 (8.8, 13.7)                                                                            | 223 (92, 477)                                                    |
|         |       | 10                          | 0.5                   | 9               | 0.95        | 0.944                | 0.810 (0.764, 0.853) | 0.4 (0.2, 1.0)                                                                       | 5.6 (3.6, 7.9)                                                                              | 234 (97, 499)                                                    |
|         |       | 10                          | 0.5                   | 11              | 0.98        | 0.979                | 0.773 (0.711, 0.831) | 0.4 (0.2, 1.0)                                                                       | 2.1 (0.7, 4.0)                                                                              | 245 (100, 526)                                                   |
|         | Men   | 10                          | 8.9                   | 13              | 0.90        | 0.901                | 0.829 (0.784, 0.870) | 7.4 (6.0, 9.1)                                                                       | 9 (7.2, 11.0)                                                                               | 14 (11, 17)                                                      |
|         |       | 10                          | 8.9                   | 16              | 0.95        | 0.949                | 0.810 (0.753, 0.866) | 7.2 (5.9, 8.9)                                                                       | 4.6 (2.9, 6.5)                                                                              | 14 (11, 17)                                                      |
|         |       | 10                          | 8.9                   | 19              | 0.98        | 0.981                | 0.792 (0.719, 0.861) | 7 (5.7, 8.8)                                                                         | 1.7 (0.5, 3.4)                                                                              | 14 (11, 17)                                                      |
|         |       | 10                          | 1.8                   | 7               | 0.90        | 0.889                | 0.848 (0.812, 0.881) | 1.5 (0.9, 2.4)                                                                       | 10.9 (8.6, 13.5)                                                                            | 67 (41, 110)                                                     |
|         |       | 10                          | 1.8                   | 9               | 0.95        | 0.944                | 0.810 (0.764, 0.853) | 1.4 (0.9, 2.3)                                                                       | 5.5 (3.6, 7.8)                                                                              | 70 (44, 114)                                                     |
| Finland | Men   | 10                          | 1.8                   | 11              | 0.98        | 0.979                | 0.773 (0.711, 0.831) | 1.4 (0.8, 2.2)                                                                       | 2.1 (0.7, 4.0)                                                                              | 74 (45, 119)                                                     |
|         |       | 12                          | 14.8                  | 12              | 0.90        | 0.9                  | 0.802 (0.763, 0.838) | 11.8 (10.1, 13.8)                                                                    | 8.5 (7.0, 10.2)                                                                             | 8 (7, 10)                                                        |
|         |       | 12                          | 14.8                  | 15              | 0.95        | 0.95                 | 0.781 (0.728, 0.833) | 11.5 (9.8, 13.5)                                                                     | 4.2 (2.8, 5.9)                                                                              | 9 (7, 10)                                                        |
|         | Women | 12                          | 14.8                  | 18              | 0.98        | 0.982                | 0.761 (0.691, 0.830) | 11.2 (9.5, 13.2)                                                                     | 1.5 (0.5, 3.0)                                                                              | 9 (8, 10)                                                        |
|         |       | 12                          | 3.8                   | 7               | 0.90        | 0.892                | 0.800 (0.769, 0.829) | 3 (2.2, 4.2)                                                                         | 10.4 (8.8, 12.2)                                                                            | 33 (24, 46)                                                      |
|         |       | 12                          | 3.8                   | 9               | 0.95        | 0.946                | 0.758 (0.717, 0.797) | 2.9 (2.0, 4.0)                                                                       | 5.2 (3.7, 6.9)                                                                              | 35 (25, 49)                                                      |
|         |       | 12                          | 3.8                   | 11              | 0.98        | 0.98                 | 0.718 (0.660, 0.773) | 2.7 (1.9, 3.7)                                                                       | 1.9 (0.7, 3.4)                                                                              | 37 (27, 52)                                                      |
| France  | Men   | 10                          | 11.1                  | 13              | 0.90        | 0.901                | 0.829 (0.784, 0.870) | 9.2 (7.6, 11.0)                                                                      | 8.8 (7.0, 10.8)                                                                             | 11 (9, 13)                                                       |
|         |       | 10                          | 11.1                  | 16              | 0.95        | 0.949                | 0.810 (0.753, 0.866) | 9 (7.4, 10.8)                                                                        | 4.5 (2.8, 6.3)                                                                              | 11 (9, 14)                                                       |
|         |       | 10                          | 11.1                  | 19              | 0.98        | 0.981                | 0.792 (0.719, 0.861) | 8.8 (7.2, 10.6)                                                                      | 1.7 (0.5, 3.3)                                                                              | 11 (9, 14)                                                       |
|         | Women | 10                          | 3.1                   | 7               | 0.90        | 0.889                | 0.848 (0.812, 0.881) | 2.7 (1.8, 3.7)                                                                       | 10.8 (8.5, 13.3)                                                                            | 38 (27, 54)                                                      |
|         |       | 10                          | 3.1                   | 9               | 0.95        | 0.944                | 0.810 (0.764, 0.853) | 2.5 (1.8, 3.6)                                                                       | 5.4 (3.5, 7.7)                                                                              | 39 (28, 57)                                                      |

| Country | Sex   | Standard drink size (grams) | Prevalence (%) of AUD | AUDIT cut-point | Specificity | Specificity (actual) | Sensitivity (95% UI) | People who have an AUD and a positive AUDIT score [per 100 people screened] (95% UI) | People who do not have an AUD and a positive AUDIT score [per 100 people screened] (95% UI) | Number of people needed to screen to treat one AUD case (95% UI) |
|---------|-------|-----------------------------|-----------------------|-----------------|-------------|----------------------|----------------------|--------------------------------------------------------------------------------------|---------------------------------------------------------------------------------------------|------------------------------------------------------------------|
| Gabon   | Men   | 10                          | 3.1                   | 11              | 0.98        | 0.979                | 0.773 (0.711, 0.831) | 2.4 (1.7, 3.4)                                                                       | 2.1 (0.7, 3.9)                                                                              | 41 (29, 59)                                                      |
|         |       | 10                          | 11.5                  | 13              | 0.90        | 0.901                | 0.829 (0.784, 0.870) | 9.5 (7.9, 11.3)                                                                      | 8.8 (7.0, 10.7)                                                                             | 11 (9, 13)                                                       |
|         |       | 10                          | 11.5                  | 16              | 0.95        | 0.949                | 0.810 (0.753, 0.866) | 9.3 (7.6, 11.1)                                                                      | 4.5 (2.8, 6.3)                                                                              | 11 (9, 13)                                                       |
|         | Women | 10                          | 11.5                  | 19              | 0.98        | 0.981                | 0.792 (0.719, 0.861) | 9.1 (7.4, 10.9)                                                                      | 1.7 (0.5, 3.3)                                                                              | 11 (9, 14)                                                       |
|         |       | 10                          | 2.1                   | 7               | 0.90        | 0.889                | 0.848 (0.812, 0.881) | 1.8 (1.2, 2.8)                                                                       | 10.9 (8.6, 13.4)                                                                            | 55 (36, 84)                                                      |
|         |       | 10                          | 2.1                   | 9               | 0.95        | 0.944                | 0.810 (0.764, 0.853) | 1.7 (1.1, 2.6)                                                                       | 5.5 (3.6, 7.7)                                                                              | 58 (38, 88)                                                      |
| Gambia  | Men   | 10                          | 2.1                   | 11              | 0.98        | 0.979                | 0.773 (0.711, 0.831) | 1.6 (1.1, 2.5)                                                                       | 2.1 (0.7, 4.0)                                                                              | 61 (39, 93)                                                      |
|         |       | 10                          | 1.9                   | 13              | 0.90        | 0.901                | 0.829 (0.784, 0.870) | 1.6 (1.0, 2.4)                                                                       | 9.7 (7.7, 11.9)                                                                             | 65 (41, 103)                                                     |
|         |       | 10                          | 1.9                   | 16              | 0.95        | 0.949                | 0.810 (0.753, 0.866) | 1.5 (1.0, 2.4)                                                                       | 5 (3.1, 7.0)                                                                                | 66 (42, 105)                                                     |
|         | Women | 10                          | 1.9                   | 19              | 0.98        | 0.981                | 0.792 (0.719, 0.861) | 1.5 (0.9, 2.3)                                                                       | 1.9 (0.5, 3.6)                                                                              | 68 (43, 108)                                                     |
|         |       | 10                          | 0.1                   | 7               | 0.90        | 0.889                | 0.848 (0.812, 0.881) | 0.1 (<0.1, 0.6)                                                                      | 11.1 (8.8, 13.7)                                                                            | 1266 (164, 9221)                                                 |
|         |       | 10                          | 0.1                   | 9               | 0.95        | 0.944                | 0.810 (0.764, 0.853) | 0.1 (<0.1, 0.6)                                                                      | 5.6 (3.6, 7.9)                                                                              | 1326 (174, 9635)                                                 |
| Georgia | Men   | 10                          | 0.1                   | 11              | 0.98        | 0.979                | 0.773 (0.711, 0.831) | 0.1 (<0.1, 0.5)                                                                      | 2.1 (0.7, 4.1)                                                                              | 1389 (185, 10056)                                                |
|         |       | 10                          | 8.8                   | 13              | 0.90        | 0.901                | 0.829 (0.784, 0.870) | 7.3 (5.9, 9.0)                                                                       | 9.1 (7.2, 11.1)                                                                             | 14 (11, 17)                                                      |
|         |       | 10                          | 8.8                   | 16              | 0.95        | 0.949                | 0.810 (0.753, 0.866) | 7.1 (5.8, 8.8)                                                                       | 4.6 (2.9, 6.5)                                                                              | 14 (11, 17)                                                      |
|         | Women | 10                          | 8.8                   | 19              | 0.98        | 0.981                | 0.792 (0.719, 0.861) | 6.9 (5.5, 8.7)                                                                       | 1.8 (0.5, 3.4)                                                                              | 14 (12, 18)                                                      |
|         |       | 10                          | 1.0                   | 7               | 0.90        | 0.889                | 0.848 (0.812, 0.881) | 0.9 (0.5, 1.7)                                                                       | 11 (8.7, 13.6)                                                                              | 113 (60, 202)                                                    |
|         |       | 10                          | 1.0                   | 9               | 0.95        | 0.944                | 0.810 (0.764, 0.853) | 0.8 (0.5, 1.6)                                                                       | 5.5 (3.6, 7.8)                                                                              | 118 (64, 214)                                                    |
| Germany | Men   | 10                          | 1.0                   | 11              | 0.98        | 0.979                | 0.773 (0.711, 0.831) | 0.8 (0.4, 1.5)                                                                       | 2.1 (0.7, 4.0)                                                                              | 124 (67, 227)                                                    |
|         |       | 12                          | 9.8                   | 12              | 0.90        | 0.9                  | 0.802 (0.763, 0.838) | 7.9 (6.4, 9.5)                                                                       | 9 (7.4, 10.8)                                                                               | 13 (11, 16)                                                      |
|         |       | 12                          | 9.8                   | 15              | 0.95        | 0.95                 | 0.781 (0.728, 0.833) | 7.7 (6.2, 9.3)                                                                       | 4.5 (3.0, 6.3)                                                                              | 13 (11, 16)                                                      |
|         |       | 12                          | 9.8                   | 18              | 0.98        | 0.982                | 0.761 (0.691, 0.830) | 7.5 (6.0, 9.2)                                                                       | 1.6 (0.5, 3.2)                                                                              | 13 (11, 17)                                                      |



| Country   | Sex   | Standard drink size (grams) | Prevalence (%) of AUD | AUDIT cut-point | Specificity | Specificity (actual) | Sensitivity (95% UI) | People who have an AUD and a positive AUDIT score [per 100 people screened] (95% UI) | People who do not have an AUD and a positive AUDIT score [per 100 people screened] (95% UI) | Number of people needed to screen to treat one AUD case (95% UI) |             |     |           |
|-----------|-------|-----------------------------|-----------------------|-----------------|-------------|----------------------|----------------------|--------------------------------------------------------------------------------------|---------------------------------------------------------------------------------------------|------------------------------------------------------------------|-------------|-----|-----------|
| Ghana     | Women | 12                          | 4.0                   | 7               | 0.90        | 0.892                | 0.800 (0.769, 0.829) | 3.2                                                                                  | (2.4, 4.3)                                                                                  | 10.4                                                             | (8.7, 12.1) | 31  | (23, 42)  |
|           |       | 12                          | 4.0                   | 9               | 0.95        | 0.946                | 0.758 (0.717, 0.797) | 3                                                                                    | (2.2, 4.1)                                                                                  | 5.2                                                              | (3.7, 6.9)  | 33  | (24, 45)  |
|           |       | 12                          | 4.0                   | 11              | 0.98        | 0.98                 | 0.718 (0.660, 0.773) | 2.9                                                                                  | (2.1, 3.9)                                                                                  | 1.9                                                              | (0.8, 3.4)  | 35  | (25, 47)  |
|           | Men   | 10                          | 7.3                   | 13              | 0.90        | 0.901                | 0.829 (0.784, 0.870) | 6.1                                                                                  | (4.8, 7.5)                                                                                  | 9.2                                                              | (7.3, 11.2) | 17  | (13, 21)  |
|           |       | 10                          | 7.3                   | 16              | 0.95        | 0.949                | 0.810 (0.753, 0.866) | 5.9                                                                                  | (4.7, 7.3)                                                                                  | 4.7                                                              | (2.9, 6.6)  | 17  | (14, 21)  |
|           |       | 10                          | 7.3                   | 19              | 0.98        | 0.981                | 0.792 (0.719, 0.861) | 5.8                                                                                  | (4.5, 7.2)                                                                                  | 1.8                                                              | (0.5, 3.4)  | 17  | (14, 22)  |
|           | Women | 10                          | 1.0                   | 7               | 0.90        | 0.889                | 0.848 (0.812, 0.881) | 0.8                                                                                  | (0.4, 1.6)                                                                                  | 11                                                               | (8.7, 13.6) | 120 | (63, 223) |
|           |       | 10                          | 1.0                   | 9               | 0.95        | 0.944                | 0.810 (0.764, 0.853) | 0.8                                                                                  | (0.4, 1.5)                                                                                  | 5.5                                                              | (3.6, 7.9)  | 126 | (66, 237) |
|           |       | 10                          | 1.0                   | 11              | 0.98        | 0.979                | 0.773 (0.711, 0.831) | 0.8                                                                                  | (0.4, 1.5)                                                                                  | 2.1                                                              | (0.7, 4.0)  | 132 | (69, 252) |
| Greece    | Men   | 13                          | 9.4                   | 12              | 0.90        | 0.91                 | 0.784 (0.738, 0.826) | 7.4                                                                                  | (6.0, 8.9)                                                                                  | 8.2                                                              | (6.4, 10.2) | 14  | (11, 17)  |
|           |       | 13                          | 9.4                   | 14              | 0.95        | 0.944                | 0.769 (0.714, 0.821) | 7.2                                                                                  | (5.9, 8.8)                                                                                  | 5.1                                                              | (3.4, 7.0)  | 14  | (11, 17)  |
|           |       | 13                          | 9.4                   | 17              | 0.98        | 0.979                | 0.749 (0.676, 0.815) | 7                                                                                    | (5.7, 8.7)                                                                                  | 1.9                                                              | (0.7, 3.7)  | 14  | (11, 18)  |
|           | Women | 13                          | 2.9                   | 7               | 0.90        | 0.893                | 0.774 (0.734, 0.809) | 2.3                                                                                  | (1.6, 3.2)                                                                                  | 10.4                                                             | (8.6, 12.4) | 44  | (32, 64)  |
|           |       | 13                          | 2.9                   | 9               | 0.95        | 0.947                | 0.731 (0.682, 0.777) | 2.1                                                                                  | (1.5, 3.0)                                                                                  | 5.1                                                              | (3.5, 6.9)  | 47  | (33, 69)  |
|           |       | 13                          | 2.9                   | 11              | 0.98        | 0.981                | 0.690 (0.625, 0.751) | 2                                                                                    | (1.4, 2.8)                                                                                  | 1.9                                                              | (0.7, 3.5)  | 49  | (35, 73)  |
| Grenada   | Men   | 14                          | 9.6                   | 11              | 0.90        | 0.899                | 0.773 (0.717, 0.823) | 7.4                                                                                  | (6.2, 9.1)                                                                                  | 9.2                                                              | (7.0, 11.4) | 13  | (11, 16)  |
|           |       | 14                          | 9.6                   | 14              | 0.95        | 0.951                | 0.750 (0.683, 0.814) | 7.2                                                                                  | (5.9, 8.9)                                                                                  | 4.4                                                              | (2.6, 6.6)  | 14  | (11, 17)  |
|           |       | 14                          | 9.6                   | 17              | 0.98        | 0.983                | 0.729 (0.646, 0.806) | 7                                                                                    | (5.7, 8.7)                                                                                  | 1.5                                                              | (0.3, 3.3)  | 14  | (11, 18)  |
|           | Women | 14                          | 3.6                   | 7               | 0.90        | 0.895                | 0.748 (0.691, 0.797) | 2.7                                                                                  | (1.9, 3.7)                                                                                  | 10.2                                                             | (7.7, 12.8) | 37  | (27, 52)  |
|           |       | 14                          | 3.6                   | 9               | 0.95        | 0.948                | 0.703 (0.640, 0.758) | 2.5                                                                                  | (1.8, 3.5)                                                                                  | 5                                                                | (3.1, 7.2)  | 40  | (28, 56)  |
|           |       | 14                          | 3.6                   | 11              | 0.98        | 0.981                | 0.661 (0.584, 0.730) | 2.4                                                                                  | (1.7, 3.3)                                                                                  | 1.8                                                              | (0.5, 3.6)  | 42  | (30, 60)  |
| Guatemala | Men   | 10                          | 9.5                   | 13              | 0.90        | 0.901                | 0.829 (0.784, 0.870) | 7.8                                                                                  | (6.4, 9.5)                                                                                  | 9                                                                | (7.2, 11.0) | 13  | (11, 16)  |

| Country       | Sex   | Standard drink size (grams) | Prevalence (%) of AUD | AUDIT cut-point | Specificity | Specificity (actual) | Sensitivity (95% UI) | People who have an AUD and a positive AUDIT score [per 100 people screened] (95% UI) | People who do not have an AUD and a positive AUDIT score [per 100 people screened] (95% UI) | Number of people needed to screen to treat one AUD case (95% UI) |
|---------------|-------|-----------------------------|-----------------------|-----------------|-------------|----------------------|----------------------|--------------------------------------------------------------------------------------|---------------------------------------------------------------------------------------------|------------------------------------------------------------------|
| Guinea        | Women | 10                          | 9.5                   | 16              | 0.95        | 0.949                | 0.810 (0.753, 0.866) | 7.7 (6.2, 9.3)                                                                       | 4.6 (2.9, 6.5)                                                                              | 13 (11, 16)                                                      |
|               |       | 10                          | 9.5                   | 19              | 0.98        | 0.981                | 0.792 (0.719, 0.861) | 7.5 (6.0, 9.1)                                                                       | 1.7 (0.5, 3.4)                                                                              | 13 (11, 17)                                                      |
|               |       | 10                          | 3.7                   | 7               | 0.90        | 0.889                | 0.848 (0.812, 0.881) | 3.1 (2.3, 4.2)                                                                       | 10.7 (8.5, 13.2)                                                                            | 32 (24, 44)                                                      |
|               |       | 10                          | 3.7                   | 9               | 0.95        | 0.944                | 0.810 (0.764, 0.853) | 3 (2.2, 4.0)                                                                         | 5.4 (3.5, 7.7)                                                                              | 34 (25, 46)                                                      |
|               |       | 10                          | 3.7                   | 11              | 0.98        | 0.979                | 0.773 (0.711, 0.831) | 2.8 (2.1, 3.9)                                                                       | 2.1 (0.7, 3.9)                                                                              | 35 (26, 48)                                                      |
|               | Men   | 10                          | 1.4                   | 13              | 0.90        | 0.901                | 0.829 (0.784, 0.870) | 1.2 (0.7, 1.9)                                                                       | 9.8 (7.8, 11.9)                                                                             | 84 (52, 142)                                                     |
|               |       | 10                          | 1.4                   | 16              | 0.95        | 0.949                | 0.810 (0.753, 0.866) | 1.2 (0.7, 1.9)                                                                       | 5 (3.1, 7.0)                                                                                | 86 (54, 146)                                                     |
|               |       | 10                          | 1.4                   | 19              | 0.98        | 0.981                | 0.792 (0.719, 0.861) | 1.1 (0.7, 1.8)                                                                       | 1.9 (0.5, 3.6)                                                                              | 88 (54, 150)                                                     |
|               |       | 10                          | 0.0                   | 7               | 0.90        | 0.889                | 0.848 (0.812, 0.881) | <0.1 (<0.1, 0.8)                                                                     | 11.1 (8.8, 13.7)                                                                            | 3204 (132, 73297)                                                |
|               |       | 10                          | 0.0                   | 9               | 0.95        | 0.944                | 0.810 (0.764, 0.853) | <0.1 (<0.1, 0.7)                                                                     | 5.6 (3.6, 7.9)                                                                              | 3356 (140, 77515)                                                |
| Guinea-Bissau | Men   | 10                          | 0.0                   | 11              | 0.98        | 0.979                | 0.773 (0.711, 0.831) | <0.1 (<0.1, 0.7)                                                                     | 2.1 (0.7, 4.1)                                                                              | 3516 (147, 82073)                                                |
|               |       | 10                          | 2.0                   | 13              | 0.90        | 0.901                | 0.829 (0.784, 0.870) | 1.6 (1.1, 2.6)                                                                       | 9.7 (7.7, 11.9)                                                                             | 62 (39, 92)                                                      |
|               |       | 10                          | 2.0                   | 16              | 0.95        | 0.949                | 0.810 (0.753, 0.866) | 1.6 (1.1, 2.5)                                                                       | 5 (3.1, 7.0)                                                                                | 63 (39, 94)                                                      |
|               |       | 10                          | 2.0                   | 19              | 0.98        | 0.981                | 0.792 (0.719, 0.861) | 1.6 (1.0, 2.5)                                                                       | 1.9 (0.5, 3.6)                                                                              | 64 (40, 97)                                                      |
|               |       | 10                          | 0.1                   | 7               | 0.90        | 0.889                | 0.848 (0.812, 0.881) | 0.1 (<0.1, 0.6)                                                                      | 11.1 (8.8, 13.7)                                                                            | 1123 (169, 7408)                                                 |
|               | Women | 10                          | 0.1                   | 9               | 0.95        | 0.944                | 0.810 (0.764, 0.853) | 0.1 (<0.1, 0.6)                                                                      | 5.6 (3.6, 7.9)                                                                              | 1177 (175, 7863)                                                 |
|               |       | 10                          | 0.1                   | 11              | 0.98        | 0.979                | 0.773 (0.711, 0.831) | 0.1 (<0.1, 0.6)                                                                      | 2.1 (0.7, 4.1)                                                                              | 1233 (181, 8436)                                                 |
|               |       | 10                          | 10.5                  | 13              | 0.90        | 0.901                | 0.829 (0.784, 0.870) | 8.7 (7.3, 10.4)                                                                      | 8.9 (7.0, 10.9)                                                                             | 12 (10, 14)                                                      |
|               |       | 10                          | 10.5                  | 16              | 0.95        | 0.949                | 0.810 (0.753, 0.866) | 8.5 (7.0, 10.2)                                                                      | 4.5 (2.8, 6.4)                                                                              | 12 (10, 14)                                                      |
|               |       | 10                          | 10.5                  | 19              | 0.98        | 0.981                | 0.792 (0.719, 0.861) | 8.3 (6.8, 10.0)                                                                      | 1.7 (0.5, 3.3)                                                                              | 12 (10, 15)                                                      |
| Guyana        | Men   | 10                          | 3.8                   | 7               | 0.90        | 0.889                | 0.848 (0.812, 0.881) | 3.3 (2.4, 4.4)                                                                       | 10.7 (8.5, 13.2)                                                                            | 31 (23, 43)                                                      |
|               |       | 10                          | 3.8                   | 9               | 0.95        | 0.944                | 0.810 (0.764, 0.853) | 3.1 (2.2, 4.2)                                                                       | 5.4 (3.5, 7.6)                                                                              | 32 (24, 45)                                                      |
|               |       | 10                          | 3.8                   | 11              | 0.98        | 0.979                | 0.773 (0.711, 0.831) | 2.8 (2.1, 3.9)                                                                       | 2.1 (0.7, 3.9)                                                                              | 35 (26, 48)                                                      |
|               | Women | 10                          | 1.4                   | 13              | 0.90        | 0.901                | 0.829 (0.784, 0.870) | 1.2 (0.7, 1.9)                                                                       | 9.8 (7.8, 11.9)                                                                             | 84 (52, 142)                                                     |
|               |       | 10                          | 1.4                   | 16              | 0.95        | 0.949                | 0.810 (0.753, 0.866) | 1.2 (0.7, 1.9)                                                                       | 5 (3.1, 7.0)                                                                                | 86 (54, 146)                                                     |

| Country  | Sex   | Standard drink size (grams) | Prevalence (%) of AUD | AUDIT cut-point | Specificity | Specificity (actual) | Sensitivity (95% UI) |                | People who have an AUD and a positive AUDIT score [per 100 people screened] (95% UI) | People who do not have an AUD and a positive AUDIT score [per 100 people screened] (95% UI) | Number of people needed to screen to treat one AUD case (95% UI) |             |    |          |
|----------|-------|-----------------------------|-----------------------|-----------------|-------------|----------------------|----------------------|----------------|--------------------------------------------------------------------------------------|---------------------------------------------------------------------------------------------|------------------------------------------------------------------|-------------|----|----------|
| Haiti    | Men   | 10                          | 3.8                   | 11              | 0.98        | 0.979                | 0.773                | (0.711, 0.831) | 3                                                                                    | (2.1, 4.0)                                                                                  | 2.1                                                              | (0.7, 3.9)  | 34 | (25, 47) |
|          |       | 10                          | 10.3                  | 13              | 0.90        | 0.901                | 0.829                | (0.784, 0.870) | 8.5                                                                                  | (7.1, 10.2)                                                                                 | 8.9                                                              | (7.1, 10.9) | 12 | (10, 14) |
|          |       | 10                          | 10.3                  | 16              | 0.95        | 0.949                | 0.810                | (0.753, 0.866) | 8.3                                                                                  | (6.9, 10.1)                                                                                 | 4.6                                                              | (2.9, 6.4)  | 12 | (10, 15) |
|          | Women | 10                          | 10.3                  | 19              | 0.98        | 0.981                | 0.792                | (0.719, 0.861) | 8.1                                                                                  | (6.7, 9.9)                                                                                  | 1.7                                                              | (0.5, 3.3)  | 12 | (10, 15) |
|          |       | 10                          | 3.8                   | 7               | 0.90        | 0.889                | 0.848                | (0.812, 0.881) | 3.2                                                                                  | (2.4, 4.3)                                                                                  | 10.7                                                             | (8.5, 13.2) | 31 | (23, 42) |
|          |       | 10                          | 3.8                   | 9               | 0.95        | 0.944                | 0.810                | (0.764, 0.853) | 3                                                                                    | (2.3, 4.1)                                                                                  | 5.4                                                              | (3.5, 7.6)  | 33 | (24, 44) |
| Honduras | Men   | 10                          | 3.8                   | 11              | 0.98        | 0.979                | 0.773                | (0.711, 0.831) | 2.9                                                                                  | (2.1, 4.0)                                                                                  | 2.1                                                              | (0.7, 3.9)  | 34 | (25, 47) |
|          |       | 10                          | 9.7                   | 13              | 0.90        | 0.901                | 0.829                | (0.784, 0.870) | 8                                                                                    | (6.6, 9.7)                                                                                  | 9                                                                | (7.1, 10.9) | 12 | (10, 15) |
|          |       | 10                          | 9.7                   | 16              | 0.95        | 0.949                | 0.810                | (0.753, 0.866) | 7.8                                                                                  | (6.4, 9.5)                                                                                  | 4.6                                                              | (2.9, 6.4)  | 13 | (11, 16) |
|          | Women | 10                          | 9.7                   | 19              | 0.98        | 0.981                | 0.792                | (0.719, 0.861) | 7.7                                                                                  | (6.2, 9.3)                                                                                  | 1.7                                                              | (0.5, 3.3)  | 13 | (11, 16) |
|          |       | 10                          | 3.7                   | 7               | 0.90        | 0.889                | 0.848                | (0.812, 0.881) | 3.1                                                                                  | (2.3, 4.2)                                                                                  | 10.7                                                             | (8.5, 13.2) | 32 | (24, 44) |
|          |       | 10                          | 3.7                   | 9               | 0.95        | 0.944                | 0.810                | (0.764, 0.853) | 3                                                                                    | (2.2, 4.0)                                                                                  | 5.4                                                              | (3.5, 7.6)  | 34 | (25, 46) |
| Hungary  | Men   | 10                          | 3.7                   | 11              | 0.98        | 0.979                | 0.773                | (0.711, 0.831) | 2.8                                                                                  | (2.0, 3.9)                                                                                  | 2.1                                                              | (0.7, 3.9)  | 35 | (26, 49) |
|          |       | 12                          | 36.9                  | 12              | 0.90        | 0.9                  | 0.802                | (0.763, 0.838) | 29.6                                                                                 | (26.7, 32.3)                                                                                | 6.3                                                              | (5.2, 7.6)  | 3  | (3, 4)   |
|          |       | 12                          | 36.9                  | 15              | 0.95        | 0.95                 | 0.781                | (0.728, 0.833) | 28.8                                                                                 | (25.6, 31.8)                                                                                | 3.1                                                              | (2.0, 4.4)  | 3  | (3, 4)   |
|          | Women | 12                          | 36.9                  | 18              | 0.98        | 0.982                | 0.761                | (0.691, 0.830) | 28.1                                                                                 | (24.6, 31.4)                                                                                | 1.1                                                              | (0.3, 2.2)  | 4  | (3, 4)   |
|          |       | 12                          | 7.2                   | 7               | 0.90        | 0.892                | 0.800                | (0.769, 0.829) | 5.8                                                                                  | (4.6, 7.2)                                                                                  | 10                                                               | (8.5, 11.7) | 17 | (14, 22) |
|          |       | 12                          | 7.2                   | 9               | 0.95        | 0.946                | 0.758                | (0.717, 0.797) | 5.5                                                                                  | (4.3, 6.9)                                                                                  | 5                                                                | (3.5, 6.6)  | 18 | (15, 23) |
| Iceland  | Men   | 12                          | 7.2                   | 11              | 0.98        | 0.98                 | 0.718                | (0.660, 0.773) | 5.2                                                                                  | (4.1, 6.6)                                                                                  | 1.8                                                              | (0.7, 3.3)  | 19 | (15, 25) |
|          |       | 8                           | 6.7                   | 14              | 0.90        | 0.901                | 0.855                | (0.797, 0.910) | 5.7                                                                                  | (4.5, 7.2)                                                                                  | 9.3                                                              | (6.6, 12.3) | 17 | (14, 22) |
|          |       | 8                           | 6.7                   | 17              | 0.95        | 0.948                | 0.838                | (0.767, 0.903) | 5.6                                                                                  | (4.4, 7.1)                                                                                  | 4.9                                                              | (2.7, 7.5)  | 18 | (14, 23) |
|          |       | 8                           | 6.7                   | 20              | 0.98        | 0.979                | 0.821                | (0.739, 0.897) | 5.5                                                                                  | (4.3, 7.0)                                                                                  | 2                                                                | (0.5, 4.1)  | 18 | (14, 23) |

| Country                    | Sex   | Standard drink size (grams) | Prevalence (%) of AUD | AUDIT cut-point | Specificity | Specificity (actual) | Sensitivity (95% UI) | People who have an AUD and a positive AUDIT score [per 100 people screened] (95% UI) | People who do not have an AUD and a positive AUDIT score [per 100 people screened] (95% UI) | Number of people needed to screen to treat one AUD case (95% UI) |
|----------------------------|-------|-----------------------------|-----------------------|-----------------|-------------|----------------------|----------------------|--------------------------------------------------------------------------------------|---------------------------------------------------------------------------------------------|------------------------------------------------------------------|
| India                      | Women | 8                           | 2.0                   | 7               | 0.90        | 0.886                | 0.891 (0.834, 0.939) | 1.8 (1.2, 2.8)                                                                       | 11.2 (7.6, 15.5)                                                                            | 55 (36, 84)                                                      |
|                            |       | 8                           | 2.0                   | 9               | 0.95        | 0.942                | 0.857 (0.788, 0.917) | 1.7 (1.1, 2.6)                                                                       | 5.7 (2.9, 9.2)                                                                              | 58 (38, 88)                                                      |
|                            |       | 8                           | 2.0                   | 11              | 0.98        | 0.977                | 0.823 (0.741, 0.895) | 1.7 (1.1, 2.5)                                                                       | 2.2 (0.5, 5.0)                                                                              | 60 (39, 92)                                                      |
|                            | Men   | 10                          | 9.1                   | 13              | 0.90        | 0.901                | 0.829 (0.784, 0.870) | 7.5 (6.1, 9.2)                                                                       | 9 (7.2, 11.0)                                                                               | 13 (11, 16)                                                      |
|                            |       | 10                          | 9.1                   | 16              | 0.95        | 0.949                | 0.810 (0.753, 0.866) | 7.4 (6.0, 9.0)                                                                       | 4.6 (2.9, 6.5)                                                                              | 14 (11, 17)                                                      |
|                            |       | 10                          | 9.1                   | 19              | 0.98        | 0.981                | 0.792 (0.719, 0.861) | 7.2 (5.8, 8.9)                                                                       | 1.7 (0.5, 3.3)                                                                              | 14 (11, 17)                                                      |
| Indonesia                  | Women | 10                          | 0.5                   | 7               | 0.90        | 0.889                | 0.848 (0.812, 0.881) | 0.4 (0.2, 1.0)                                                                       | 11.1 (8.8, 13.6)                                                                            | 246 (102, 560)                                                   |
|                            |       | 10                          | 0.5                   | 9               | 0.95        | 0.944                | 0.810 (0.764, 0.853) | 0.4 (0.2, 0.9)                                                                       | 5.6 (3.6, 7.9)                                                                              | 257 (107, 588)                                                   |
|                            |       | 10                          | 0.5                   | 11              | 0.98        | 0.979                | 0.773 (0.711, 0.831) | 0.4 (0.2, 0.9)                                                                       | 2.1 (0.7, 4.0)                                                                              | 270 (111, 617)                                                   |
|                            | Men   | 10                          | 1.4                   | 13              | 0.90        | 0.901                | 0.829 (0.784, 0.870) | 1.1 (0.7, 2.0)                                                                       | 9.8 (7.8, 11.9)                                                                             | 89 (50, 151)                                                     |
|                            |       | 10                          | 1.4                   | 16              | 0.95        | 0.949                | 0.810 (0.753, 0.866) | 1.1 (0.6, 1.9)                                                                       | 5 (3.1, 7.0)                                                                                | 91 (51, 155)                                                     |
|                            |       | 10                          | 1.4                   | 19              | 0.98        | 0.981                | 0.792 (0.719, 0.861) | 1.1 (0.6, 1.9)                                                                       | 1.9 (0.5, 3.6)                                                                              | 93 (52, 159)                                                     |
| Iran (Islamic Republic of) | Women | 10                          | 0.3                   | 7               | 0.90        | 0.889                | 0.848 (0.812, 0.881) | 0.2 (0.1, 0.8)                                                                       | 11.1 (8.8, 13.7)                                                                            | 464 (133, 1722)                                                  |
|                            |       | 10                          | 0.3                   | 9               | 0.95        | 0.944                | 0.810 (0.764, 0.853) | 0.2 (0.1, 0.7)                                                                       | 5.6 (3.6, 7.9)                                                                              | 486 (138, 1828)                                                  |
|                            |       | 10                          | 0.3                   | 11              | 0.98        | 0.979                | 0.773 (0.711, 0.831) | 0.2 (0.1, 0.7)                                                                       | 2.1 (0.7, 4.1)                                                                              | 509 (145, 1922)                                                  |
|                            | Men   | 10                          | 1.8                   | 13              | 0.90        | 0.901                | 0.829 (0.784, 0.870) | 1.5 (1.0, 2.5)                                                                       | 9.7 (7.8, 11.9)                                                                             | 66 (41, 101)                                                     |
|                            |       | 10                          | 1.8                   | 16              | 0.95        | 0.949                | 0.810 (0.753, 0.866) | 1.5 (1.0, 2.4)                                                                       | 5 (3.1, 7.0)                                                                                | 67 (42, 102)                                                     |
|                            |       | 10                          | 1.8                   | 19              | 0.98        | 0.981                | 0.792 (0.719, 0.861) | 1.4 (0.9, 2.3)                                                                       | 1.9 (0.5, 3.6)                                                                              | 69 (43, 106)                                                     |
| Iraq                       | Women | 10                          | 0.1                   | 7               | 0.90        | 0.889                | 0.848 (0.812, 0.881) | 0.1 (<0.1, 0.5)                                                                      | 11.1 (8.8, 13.7)                                                                            | 1474 (185, 12987)                                                |
|                            |       | 10                          | 0.1                   | 9               | 0.95        | 0.944                | 0.810 (0.764, 0.853) | 0.1 (<0.1, 0.5)                                                                      | 5.6 (3.6, 7.9)                                                                              | 1544 (195, 13619)                                                |
|                            |       | 10                          | 0.1                   | 11              | 0.98        | 0.979                | 0.773 (0.711, 0.831) | 0.1 (<0.1, 0.5)                                                                      | 2.1 (0.7, 4.1)                                                                              | 1618 (206, 14325)                                                |
| Men                        | 10    | 0.7                         | 13                    | 0.90            | 0.901       | 0.829 (0.784, 0.870) | 0.5 (0.2, 1.1)       | 9.9 (7.8, 12.0)                                                                      | 184 (92, 401)                                                                               |                                                                  |

| Country | Sex   | Standard drink size (grams) | Prevalence (%) of AUD | AUDIT cut-point | Specificity | Specificity (actual) | Sensitivity (95% UI) | People who have an AUD and a positive AUDIT score [per 100 people screened] (95% UI) | People who do not have an AUD and a positive AUDIT score [per 100 people screened] (95% UI) | Number of people needed to screen to treat one AUD case (95% UI) |
|---------|-------|-----------------------------|-----------------------|-----------------|-------------|----------------------|----------------------|--------------------------------------------------------------------------------------|---------------------------------------------------------------------------------------------|------------------------------------------------------------------|
| Ireland | Women | 10                          | 0.7                   | 16              | 0.95        | 0.949                | 0.810 (0.753, 0.866) | 0.5 (0.2, 1.1)                                                                       | 5 (3.1, 7.1)                                                                                | 188 (94, 416)                                                    |
|         |       | 10                          | 0.7                   | 19              | 0.98        | 0.981                | 0.792 (0.719, 0.861) | 0.5 (0.2, 1.0)                                                                       | 1.9 (0.5, 3.7)                                                                              | 192 (96, 429)                                                    |
|         |       | 10                          | 0.1                   | 7               | 0.90        | 0.889                | 0.848 (0.812, 0.881) | 0.1 (<0.1, 0.6)                                                                      | 11.1 (8.8, 13.7)                                                                            | 958 (175, 5298)                                                  |
|         |       | 10                          | 0.1                   | 9               | 0.95        | 0.944                | 0.810 (0.764, 0.853) | 0.1 (<0.1, 0.5)                                                                      | 5.6 (3.6, 7.9)                                                                              | 1004 (184, 5617)                                                 |
|         |       | 10                          | 0.1                   | 11              | 0.98        | 0.979                | 0.773 (0.711, 0.831) | 0.1 (<0.1, 0.5)                                                                      | 2.1 (0.7, 4.1)                                                                              | 1052 (190, 5921)                                                 |
|         | Men   | 10                          | 13.0                  | 13              | 0.90        | 0.901                | 0.829 (0.784, 0.870) | 10.8 (9.2, 12.5)                                                                     | 8.6 (6.9, 10.6)                                                                             | 9 (8, 11)                                                        |
|         |       | 10                          | 13.0                  | 16              | 0.95        | 0.949                | 0.810 (0.753, 0.866) | 10.5 (8.9, 12.3)                                                                     | 4.4 (2.7, 6.2)                                                                              | 10 (8, 11)                                                       |
|         |       | 10                          | 13.0                  | 19              | 0.98        | 0.981                | 0.792 (0.719, 0.861) | 10.3 (8.7, 12.1)                                                                     | 1.7 (0.5, 3.2)                                                                              | 10 (8, 12)                                                       |
|         |       | 10                          | 4.1                   | 7               | 0.90        | 0.889                | 0.848 (0.812, 0.881) | 3.4 (2.5, 4.7)                                                                       | 10.7 (8.5, 13.2)                                                                            | 29 (21, 40)                                                      |
|         |       | 10                          | 4.1                   | 9               | 0.95        | 0.944                | 0.810 (0.764, 0.853) | 3.3 (2.4, 4.5)                                                                       | 5.4 (3.5, 7.6)                                                                              | 30 (22, 42)                                                      |
| Israel  | Men   | 10                          | 4.1                   | 11              | 0.98        | 0.979                | 0.773 (0.711, 0.831) | 3.1 (2.3, 4.3)                                                                       | 2 (0.7, 3.9)                                                                                | 32 (23, 44)                                                      |
|         |       | 10                          | 9.8                   | 13              | 0.90        | 0.901                | 0.829 (0.784, 0.870) | 8.1 (6.6, 9.7)                                                                       | 9 (7.1, 10.9)                                                                               | 12 (10, 15)                                                      |
|         |       | 10                          | 9.8                   | 16              | 0.95        | 0.949                | 0.810 (0.753, 0.866) | 7.9 (6.4, 9.5)                                                                       | 4.6 (2.9, 6.4)                                                                              | 13 (11, 16)                                                      |
|         |       | 10                          | 9.8                   | 19              | 0.98        | 0.981                | 0.792 (0.719, 0.861) | 7.7 (6.2, 9.3)                                                                       | 1.7 (0.5, 3.3)                                                                              | 13 (11, 16)                                                      |
|         |       | 10                          | 2.1                   | 7               | 0.90        | 0.889                | 0.848 (0.812, 0.881) | 1.8 (1.2, 2.7)                                                                       | 10.9 (8.6, 13.4)                                                                            | 55 (37, 84)                                                      |
|         | Women | 10                          | 2.1                   | 9               | 0.95        | 0.944                | 0.810 (0.764, 0.853) | 1.7 (1.1, 2.6)                                                                       | 5.5 (3.6, 7.8)                                                                              | 58 (39, 88)                                                      |
|         |       | 10                          | 2.1                   | 11              | 0.98        | 0.979                | 0.773 (0.711, 0.831) | 1.6 (1.1, 2.5)                                                                       | 2.1 (0.7, 4.0)                                                                              | 61 (40, 92)                                                      |
|         |       | 12                          | 1.7                   | 12              | 0.90        | 0.9                  | 0.802 (0.763, 0.838) | 1.3 (0.8, 2.1)                                                                       | 9.8 (8.1, 11.7)                                                                             | 75 (47, 123)                                                     |
|         |       | 12                          | 1.7                   | 15              | 0.95        | 0.95                 | 0.781 (0.728, 0.833) | 1.3 (0.8, 2.1)                                                                       | 4.9 (3.2, 6.8)                                                                              | 77 (49, 126)                                                     |
|         |       | 12                          | 1.7                   | 18              | 0.98        | 0.982                | 0.761 (0.691, 0.830) | 1.3 (0.8, 2.0)                                                                       | 1.7 (0.5, 3.5)                                                                              | 79 (50, 130)                                                     |
| Italy   | Women | 12                          | 1.0                   | 7               | 0.90        | 0.892                | 0.800 (0.769, 0.829) | 0.8 (0.4, 1.5)                                                                       | 10.7 (9.0, 12.5)                                                                            | 125 (67, 227)                                                    |
|         |       | 12                          | 1.0                   | 9               | 0.95        | 0.946                | 0.758 (0.717, 0.797) | 0.8 (0.4, 1.4)                                                                       | 5.3 (3.8, 7.1)                                                                              | 132 (71, 238)                                                    |

| Country    | Sex   | Standard drink size (grams) | Prevalence (% of AUD) | AUDIT cut-point | Specificity | Specificity (actual) | Sensitivity (95% UI) | People who have an AUD and a positive AUDIT score [per 100 people screened] (95% UI) | People who do not have an AUD and a positive AUDIT score [per 100 people screened] (95% UI) | Number of people needed to screen to treat one AUD case (95% UI) |
|------------|-------|-----------------------------|-----------------------|-----------------|-------------|----------------------|----------------------|--------------------------------------------------------------------------------------|---------------------------------------------------------------------------------------------|------------------------------------------------------------------|
| Jamaica    | Men   | 12                          | 1.0                   | 11              | 0.98        | 0.98                 | 0.718 (0.660, 0.773) | 0.7 (0.4, 1.4)                                                                       | 2 (0.8, 3.5)                                                                                | 139 (74, 250)                                                    |
|            |       | 10                          | 8.2                   | 13              | 0.90        | 0.901                | 0.829 (0.784, 0.870) | 6.8 (5.5, 8.5)                                                                       | 9.1 (7.2, 11.2)                                                                             | 15 (12, 18)                                                      |
|            |       | 10                          | 8.2                   | 16              | 0.95        | 0.949                | 0.810 (0.753, 0.866) | 6.6 (5.4, 8.4)                                                                       | 4.7 (2.9, 6.6)                                                                              | 15 (12, 19)                                                      |
|            | Women | 10                          | 8.2                   | 19              | 0.98        | 0.981                | 0.792 (0.719, 0.861) | 6.5 (5.2, 8.2)                                                                       | 1.8 (0.5, 3.4)                                                                              | 15 (12, 19)                                                      |
|            |       | 10                          | 2.3                   | 7               | 0.90        | 0.889                | 0.848 (0.812, 0.881) | 2 (1.3, 2.9)                                                                         | 10.9 (8.6, 13.4)                                                                            | 50 (35, 75)                                                      |
|            |       | 10                          | 2.3                   | 9               | 0.95        | 0.944                | 0.810 (0.764, 0.853) | 1.9 (1.3, 2.8)                                                                       | 5.5 (3.6, 7.8)                                                                              | 53 (36, 78)                                                      |
| Japan      | Men   | 10                          | 2.3                   | 11              | 0.98        | 0.979                | 0.773 (0.711, 0.831) | 1.8 (1.2, 2.6)                                                                       | 2.1 (0.7, 4.0)                                                                              | 55 (38, 82)                                                      |
|            |       | 10                          | 5.7                   | 13              | 0.90        | 0.901                | 0.829 (0.784, 0.870) | 4.7 (3.6, 6.1)                                                                       | 9.4 (7.4, 11.4)                                                                             | 21 (16, 28)                                                      |
|            |       | 10                          | 5.7                   | 16              | 0.95        | 0.949                | 0.810 (0.753, 0.866) | 4.6 (3.5, 6.0)                                                                       | 4.8 (3.0, 6.7)                                                                              | 22 (17, 28)                                                      |
|            | Women | 10                          | 5.7                   | 19              | 0.98        | 0.981                | 0.792 (0.719, 0.861) | 4.5 (3.4, 5.8)                                                                       | 1.8 (0.5, 3.5)                                                                              | 22 (17, 29)                                                      |
|            |       | 10                          | 1.4                   | 7               | 0.90        | 0.889                | 0.848 (0.812, 0.881) | 1.1 (0.7, 2.0)                                                                       | 11 (8.7, 13.6)                                                                              | 87 (51, 150)                                                     |
|            |       | 10                          | 1.4                   | 9               | 0.95        | 0.944                | 0.810 (0.764, 0.853) | 1.1 (0.6, 1.8)                                                                       | 5.5 (3.6, 7.8)                                                                              | 91 (54, 157)                                                     |
| Jordan     | Men   | 10                          | 1.4                   | 11              | 0.98        | 0.979                | 0.773 (0.711, 0.831) | 1 (0.6, 1.8)                                                                         | 2.1 (0.7, 4.0)                                                                              | 96 (56, 164)                                                     |
|            |       | 10                          | 0.7                   | 13              | 0.90        | 0.901                | 0.829 (0.784, 0.870) | 0.6 (0.3, 1.3)                                                                       | 9.9 (7.9, 12.0)                                                                             | 162 (78, 329)                                                    |
|            |       | 10                          | 0.7                   | 16              | 0.95        | 0.949                | 0.810 (0.753, 0.866) | 0.6 (0.3, 1.3)                                                                       | 5 (3.1, 7.1)                                                                                | 166 (80, 339)                                                    |
|            | Women | 10                          | 0.7                   | 19              | 0.98        | 0.981                | 0.792 (0.719, 0.861) | 0.6 (0.3, 1.2)                                                                       | 1.9 (0.5, 3.7)                                                                              | 169 (82, 348)                                                    |
|            |       | 10                          | 0.1                   | 7               | 0.90        | 0.889                | 0.848 (0.812, 0.881) | 0.1 (<0.1, 0.6)                                                                      | 11.1 (8.8, 13.7)                                                                            | 878 (165, 5072)                                                  |
|            |       | 10                          | 0.1                   | 9               | 0.95        | 0.944                | 0.810 (0.764, 0.853) | 0.1 (<0.1, 0.6)                                                                      | 5.6 (3.6, 7.9)                                                                              | 920 (173, 5313)                                                  |
| Kazakhstan | Men   | 10                          | 0.1                   | 11              | 0.98        | 0.979                | 0.773 (0.711, 0.831) | 0.1 (<0.1, 0.6)                                                                      | 2.1 (0.7, 4.1)                                                                              | 963 (180, 5570)                                                  |
|            |       | 10                          | 10.3                  | 13              | 0.90        | 0.901                | 0.829 (0.784, 0.870) | 8.5 (7.0, 10.2)                                                                      | 8.9 (7.1, 10.9)                                                                             | 12 (10, 14)                                                      |
|            |       | 10                          | 10.3                  | 16              | 0.95        | 0.949                | 0.810 (0.753, 0.866) | 8.3 (6.8, 10.0)                                                                      | 4.6 (2.9, 6.4)                                                                              | 12 (10, 15)                                                      |
|            |       | 10                          | 10.3                  | 19              | 0.98        | 0.981                | 0.792 (0.719, 0.861) | 8.1 (6.6, 9.8)                                                                       | 1.7 (0.5, 3.3)                                                                              | 12 (10, 15)                                                      |

| Country    | Sex      | Standard drink size (grams) | Prevalence (%) of AUD | AUDIT cut-point | Specificity | Specificity (actual) | Sensitivity (95% UI) | People who have an AUD and a positive AUDIT score [per 100 people screened] (95% UI) | People who do not have an AUD and a positive AUDIT score [per 100 people screened] (95% UI) | Number of people needed to screen to treat one AUD case (95% UI) |               |
|------------|----------|-----------------------------|-----------------------|-----------------|-------------|----------------------|----------------------|--------------------------------------------------------------------------------------|---------------------------------------------------------------------------------------------|------------------------------------------------------------------|---------------|
| Kenya      | Women    | 10                          | 2.2                   | 7               | 0.90        | 0.889                | 0.848 (0.812, 0.881) | 1.8 (1.2, 2.8)                                                                       | 10.9 (8.6, 13.4)                                                                            | 54 (36, 82)                                                      |               |
|            |          | 10                          | 2.2                   | 9               | 0.95        | 0.944                | 0.810 (0.764, 0.853) | 1.8 (1.2, 2.6)                                                                       | 5.5 (3.5, 7.7)                                                                              | 57 (38, 86)                                                      |               |
|            |          | 10                          | 2.2                   | 11              | 0.98        | 0.979                | 0.773 (0.711, 0.831) | 1.7 (1.1, 2.5)                                                                       | 2.1 (0.7, 4.0)                                                                              | 60 (40, 91)                                                      |               |
|            | Men      | 10                          | 7.1                   | 13              | 0.90        | 0.901                | 0.829 (0.784, 0.870) | 5.9 (4.7, 7.5)                                                                       | 9.2 (7.3, 11.2)                                                                             | 17 (13, 21)                                                      |               |
|            |          | 10                          | 7.1                   | 16              | 0.95        | 0.949                | 0.810 (0.753, 0.866) | 5.8 (4.6, 7.3)                                                                       | 4.7 (3.0, 6.6)                                                                              | 17 (14, 22)                                                      |               |
|            |          | 10                          | 7.1                   | 19              | 0.98        | 0.981                | 0.792 (0.719, 0.861) | 5.6 (4.4, 7.2)                                                                       | 1.8 (0.5, 3.4)                                                                              | 18 (14, 23)                                                      |               |
|            | Kiribati | Women                       | 10                    | 0.9             | 7           | 0.90                 | 0.889                | 0.848 (0.812, 0.881)                                                                 | 0.8 (0.4, 1.5)                                                                              | 11 (8.7, 13.6)                                                   | 126 (66, 231) |
|            |          |                             | 10                    | 0.9             | 9           | 0.95                 | 0.944                | 0.810 (0.764, 0.853)                                                                 | 0.8 (0.4, 1.5)                                                                              | 5.6 (3.6, 7.8)                                                   | 132 (69, 242) |
|            |          |                             | 10                    | 0.9             | 11          | 0.98                 | 0.979                | 0.773 (0.711, 0.831)                                                                 | 0.7 (0.4, 1.4)                                                                              | 2.1 (0.7, 4.0)                                                   | 138 (72, 254) |
| Men        |          | 10                          | 8.9                   | 13              | 0.90        | 0.901                | 0.829 (0.784, 0.870) | 7.4 (6.0, 9.0)                                                                       | 9 (7.2, 11.0)                                                                               | 13 (11, 17)                                                      |               |
|            |          | 10                          | 8.9                   | 16              | 0.95        | 0.949                | 0.810 (0.753, 0.866) | 7.2 (5.8, 8.8)                                                                       | 4.6 (2.9, 6.5)                                                                              | 14 (11, 17)                                                      |               |
|            |          | 10                          | 8.9                   | 19              | 0.98        | 0.981                | 0.792 (0.719, 0.861) | 7.1 (5.6, 8.7)                                                                       | 1.7 (0.5, 3.4)                                                                              | 14 (12, 18)                                                      |               |
| Kuwait     | Women    | 10                          | 1.8                   | 7               | 0.90        | 0.889                | 0.848 (0.812, 0.881) | 1.5 (0.9, 2.4)                                                                       | 10.9 (8.7, 13.5)                                                                            | 67 (42, 107)                                                     |               |
|            |          | 10                          | 1.8                   | 9               | 0.95        | 0.944                | 0.810 (0.764, 0.853) | 1.4 (0.9, 2.3)                                                                       | 5.5 (3.6, 7.8)                                                                              | 70 (44, 113)                                                     |               |
|            |          | 10                          | 1.8                   | 11              | 0.98        | 0.979                | 0.773 (0.711, 0.831) | 1.4 (0.8, 2.2)                                                                       | 2.1 (0.7, 4.0)                                                                              | 74 (46, 119)                                                     |               |
|            | Men      | 10                          | 0.6                   | 13              | 0.90        | 0.901                | 0.829 (0.784, 0.870) | 0.5 (0.2, 1.1)                                                                       | 9.9 (7.9, 12.0)                                                                             | 206 (88, 443)                                                    |               |
|            |          | 10                          | 0.6                   | 16              | 0.95        | 0.949                | 0.810 (0.753, 0.866) | 0.5 (0.2, 1.1)                                                                       | 5 (3.1, 7.1)                                                                                | 211 (89, 459)                                                    |               |
|            |          | 10                          | 0.6                   | 19              | 0.98        | 0.981                | 0.792 (0.719, 0.861) | 0.5 (0.2, 1.1)                                                                       | 1.9 (0.5, 3.6)                                                                              | 215 (92, 470)                                                    |               |
|            | Women    | 10                          | 0.1                   | 7               | 0.90        | 0.889                | 0.848 (0.812, 0.881) | 0.1 (<0.1, 0.6)                                                                      | 11.1 (8.8, 13.7)                                                                            | 1055 (167, 6795)                                                 |               |
|            |          | 10                          | 0.1                   | 9               | 0.95        | 0.944                | 0.810 (0.764, 0.853) | 0.1 (<0.1, 0.6)                                                                      | 5.6 (3.6, 7.9)                                                                              | 1105 (174, 7224)                                                 |               |
|            |          | 10                          | 0.1                   | 11              | 0.98        | 0.979                | 0.773 (0.711, 0.831) | 0.1 (<0.1, 0.6)                                                                      | 2.1 (0.7, 4.1)                                                                              | 1158 (181, 7488)                                                 |               |
| Kyrgyzstan | Men      | 10                          | 9.9                   | 13              | 0.90        | 0.901                | 0.829 (0.784, 0.870) | 8.2 (6.8, 10.0)                                                                      | 8.9 (7.1, 10.9)                                                                             | 12 (10, 15)                                                      |               |

| Country                          | Sex   | Standard drink size (grams) | Prevalence (%) of AUD | AUDIT cut-point | Specificity | Specificity (actual) | Sensitivity (95% UI) | People who have an AUD and a positive AUDIT score [per 100 people screened] (95% UI) | People who do not have an AUD and a positive AUDIT score [per 100 people screened] (95% UI) | Number of people needed to screen to treat one AUD case (95% UI) |
|----------------------------------|-------|-----------------------------|-----------------------|-----------------|-------------|----------------------|----------------------|--------------------------------------------------------------------------------------|---------------------------------------------------------------------------------------------|------------------------------------------------------------------|
| Lao People's Democratic Republic | Women | 10                          | 9.9                   | 16              | 0.95        | 0.949                | 0.810 (0.753, 0.866) | 8 (6.6, 9.7)                                                                         | 4.6 (2.9, 6.4)                                                                              | 12 (10, 15)                                                      |
|                                  |       | 10                          | 9.9                   | 19              | 0.98        | 0.981                | 0.792 (0.719, 0.861) | 7.9 (6.4, 9.6)                                                                       | 1.7 (0.5, 3.3)                                                                              | 13 (10, 16)                                                      |
|                                  |       | 10                          | 2.1                   | 7               | 0.90        | 0.889                | 0.848 (0.812, 0.881) | 1.8 (1.2, 2.8)                                                                       | 10.9 (8.6, 13.5)                                                                            | 56 (36, 86)                                                      |
|                                  |       | 10                          | 2.1                   | 9               | 0.95        | 0.944                | 0.810 (0.764, 0.853) | 1.7 (1.1, 2.6)                                                                       | 5.5 (3.6, 7.8)                                                                              | 58 (38, 89)                                                      |
|                                  |       | 10                          | 2.1                   | 11              | 0.98        | 0.979                | 0.773 (0.711, 0.831) | 1.6 (1.1, 2.5)                                                                       | 2.1 (0.7, 4.0)                                                                              | 61 (39, 93)                                                      |
|                                  | Men   | 10                          | 8.7                   | 13              | 0.90        | 0.901                | 0.829 (0.784, 0.870) | 7.2 (5.7, 8.8)                                                                       | 9.1 (7.2, 11.0)                                                                             | 14 (11, 17)                                                      |
|                                  |       | 10                          | 8.7                   | 16              | 0.95        | 0.949                | 0.810 (0.753, 0.866) | 7 (5.6, 8.6)                                                                         | 4.6 (2.9, 6.5)                                                                              | 14 (12, 18)                                                      |
|                                  |       | 10                          | 8.7                   | 19              | 0.98        | 0.981                | 0.792 (0.719, 0.861) | 6.9 (5.4, 8.5)                                                                       | 1.8 (0.5, 3.4)                                                                              | 15 (12, 19)                                                      |
|                                  |       | 10                          | 1.8                   | 7               | 0.90        | 0.889                | 0.848 (0.812, 0.881) | 1.5 (1.0, 2.4)                                                                       | 10.9 (8.7, 13.5)                                                                            | 67 (42, 105)                                                     |
|                                  |       | 10                          | 1.8                   | 9               | 0.95        | 0.944                | 0.810 (0.764, 0.853) | 1.4 (0.9, 2.3)                                                                       | 5.5 (3.5, 7.8)                                                                              | 70 (44, 111)                                                     |
| Latvia                           | Men   | 10                          | 1.8                   | 11              | 0.98        | 0.979                | 0.773 (0.711, 0.831) | 1.4 (0.8, 2.2)                                                                       | 2.1 (0.7, 4.0)                                                                              | 73 (46, 118)                                                     |
|                                  |       | 12                          | 28.8                  | 12              | 0.90        | 0.9                  | 0.802 (0.763, 0.838) | 23.1 (20.7, 25.4)                                                                    | 7.1 (5.8, 8.6)                                                                              | 4 (4, 5)                                                         |
|                                  |       | 12                          | 28.8                  | 15              | 0.95        | 0.95                 | 0.781 (0.728, 0.833) | 22.5 (19.9, 25.0)                                                                    | 3.5 (2.3, 5.0)                                                                              | 4 (4, 5)                                                         |
|                                  | Women | 12                          | 28.8                  | 18              | 0.98        | 0.982                | 0.761 (0.691, 0.830) | 21.9 (19.1, 24.7)                                                                    | 1.3 (0.4, 2.5)                                                                              | 5 (4, 5)                                                         |
|                                  |       | 12                          | 4.6                   | 7               | 0.90        | 0.892                | 0.800 (0.769, 0.829) | 3.7 (2.8, 4.9)                                                                       | 10.3 (8.7, 12.1)                                                                            | 27 (20, 35)                                                      |
|                                  |       | 12                          | 4.6                   | 9               | 0.95        | 0.946                | 0.758 (0.717, 0.797) | 3.5 (2.7, 4.7)                                                                       | 5.1 (3.6, 6.8)                                                                              | 28 (21, 38)                                                      |
| Lebanon                          | Men   | 12                          | 4.6                   | 11              | 0.98        | 0.98                 | 0.718 (0.660, 0.773) | 3.3 (2.5, 4.4)                                                                       | 1.9 (0.7, 3.4)                                                                              | 30 (23, 39)                                                      |
|                                  |       | 10                          | 15.8                  | 13              | 0.90        | 0.901                | 0.829 (0.784, 0.870) | 13.1 (11.2, 15.2)                                                                    | 8.4 (6.6, 10.2)                                                                             | 8 (7, 9)                                                         |
|                                  |       | 10                          | 15.8                  | 16              | 0.95        | 0.949                | 0.810 (0.753, 0.866) | 12.8 (10.9, 14.9)                                                                    | 4.3 (2.7, 6.0)                                                                              | 8 (7, 9)                                                         |
|                                  | Women | 10                          | 15.8                  | 19              | 0.98        | 0.981                | 0.792 (0.719, 0.861) | 12.5 (10.5, 14.7)                                                                    | 1.6 (0.5, 3.1)                                                                              | 8 (7, 10)                                                        |
|                                  |       | 10                          | 1.6                   | 7               | 0.90        | 0.889                | 0.848 (0.812, 0.881) | 1.3 (0.8, 2.2)                                                                       | 10.9 (8.7, 13.5)                                                                            | 76 (46, 125)                                                     |



| Country   | Sex   | Standard drink size (grams) | Prevalence (%) of AUD | AUDIT cut-point | Specificity | Specificity (actual) | Sensitivity (95% UI) | People who have an AUD and a positive AUDIT score [per 100 people screened] (95% UI) | People who do not have an AUD and a positive AUDIT score [per 100 people screened] (95% UI) | Number of people needed to screen to treat one AUD case (95% UI) |
|-----------|-------|-----------------------------|-----------------------|-----------------|-------------|----------------------|----------------------|--------------------------------------------------------------------------------------|---------------------------------------------------------------------------------------------|------------------------------------------------------------------|
| Lesotho   | Men   | 10                          | 1.6                   | 9               | 0.95        | 0.944                | 0.810 (0.764, 0.853) | 1.3 (0.8, 2.1)                                                                       | 5.5 (3.6, 7.8)                                                                              | 79 (48, 132)                                                     |
|           |       | 10                          | 1.6                   | 11              | 0.98        | 0.979                | 0.773 (0.711, 0.831) | 1.2 (0.7, 2.0)                                                                       | 2.1 (0.7, 4.0)                                                                              | 83 (50, 139)                                                     |
|           |       | 10                          | 9.3                   | 13              | 0.90        | 0.901                | 0.829 (0.784, 0.870) | 7.7 (6.3, 9.3)                                                                       | 9 (7.2, 11.0)                                                                               | 13 (11, 16)                                                      |
|           | Women | 10                          | 9.3                   | 16              | 0.95        | 0.949                | 0.810 (0.753, 0.866) | 7.5 (6.1, 9.1)                                                                       | 4.6 (2.9, 6.5)                                                                              | 13 (11, 16)                                                      |
|           |       | 10                          | 9.3                   | 19              | 0.98        | 0.981                | 0.792 (0.719, 0.861) | 7.3 (5.9, 8.9)                                                                       | 1.7 (0.5, 3.3)                                                                              | 14 (11, 17)                                                      |
|           |       | 10                          | 1.3                   | 7               | 0.90        | 0.889                | 0.848 (0.812, 0.881) | 1.1 (0.6, 1.9)                                                                       | 11 (8.7, 13.5)                                                                              | 89 (52, 154)                                                     |
| Liberia   | Men   | 10                          | 1.3                   | 9               | 0.95        | 0.944                | 0.810 (0.764, 0.853) | 1.1 (0.6, 1.8)                                                                       | 5.5 (3.6, 7.8)                                                                              | 94 (54, 162)                                                     |
|           |       | 10                          | 1.3                   | 11              | 0.98        | 0.979                | 0.773 (0.711, 0.831) | 1 (0.6, 1.8)                                                                         | 2.1 (0.7, 4.0)                                                                              | 98 (56, 171)                                                     |
|           |       | 10                          | 9.2                   | 13              | 0.90        | 0.901                | 0.829 (0.784, 0.870) | 7.6 (6.2, 9.3)                                                                       | 9 (7.2, 11.0)                                                                               | 13 (11, 16)                                                      |
|           | Women | 10                          | 9.2                   | 16              | 0.95        | 0.949                | 0.810 (0.753, 0.866) | 7.4 (6.0, 9.1)                                                                       | 4.6 (2.9, 6.5)                                                                              | 13 (11, 17)                                                      |
|           |       | 10                          | 9.2                   | 19              | 0.98        | 0.981                | 0.792 (0.719, 0.861) | 7.3 (5.8, 8.9)                                                                       | 1.7 (0.5, 3.4)                                                                              | 14 (11, 17)                                                      |
|           |       | 10                          | 1.3                   | 7               | 0.90        | 0.889                | 0.848 (0.812, 0.881) | 1.1 (0.6, 1.9)                                                                       | 11 (8.7, 13.5)                                                                              | 90 (53, 155)                                                     |
| Libya     | Men   | 10                          | 1.3                   | 9               | 0.95        | 0.944                | 0.810 (0.764, 0.853) | 1.1 (0.6, 1.8)                                                                       | 5.5 (3.6, 7.8)                                                                              | 95 (56, 164)                                                     |
|           |       | 10                          | 1.3                   | 11              | 0.98        | 0.979                | 0.773 (0.711, 0.831) | 1 (0.6, 1.7)                                                                         | 2.1 (0.7, 4.0)                                                                              | 99 (59, 170)                                                     |
|           |       | 10                          | 0.5                   | 13              | 0.90        | 0.901                | 0.829 (0.784, 0.870) | 0.4 (0.2, 1.0)                                                                       | 9.9 (7.8, 12.0)                                                                             | 233 (101, 549)                                                   |
|           | Women | 10                          | 0.5                   | 16              | 0.95        | 0.949                | 0.810 (0.753, 0.866) | 0.4 (0.2, 1.0)                                                                       | 5 (3.1, 7.1)                                                                                | 239 (102, 560)                                                   |
|           |       | 10                          | 0.5                   | 19              | 0.98        | 0.981                | 0.792 (0.719, 0.861) | 0.4 (0.2, 1.0)                                                                       | 1.9 (0.5, 3.7)                                                                              | 244 (105, 575)                                                   |
|           |       | 10                          | 0.1                   | 7               | 0.90        | 0.889                | 0.848 (0.812, 0.881) | 0.1 (<0.1, 0.7)                                                                      | 11.1 (8.8, 13.7)                                                                            | 1142 (144, 7914)                                                 |
| Lithuania | Men   | 10                          | 0.1                   | 9               | 0.95        | 0.944                | 0.810 (0.764, 0.853) | 0.1 (<0.1, 0.7)                                                                      | 5.6 (3.6, 7.9)                                                                              | 1196 (153, 8213)                                                 |
|           |       | 10                          | 0.1                   | 11              | 0.98        | 0.979                | 0.773 (0.711, 0.831) | 0.1 (<0.1, 0.6)                                                                      | 2.1 (0.7, 4.1)                                                                              | 1253 (162, 8692)                                                 |
|           | Men   | 10                          | 19.9                  | 13              | 0.90        | 0.901                | 0.829 (0.784, 0.870) | 16.5 (14.2, 18.9)                                                                    | 8 (6.3, 9.7)                                                                                | 6 (5, 7)                                                         |
|           |       | 10                          | 19.9                  | 16              | 0.95        | 0.949                | 0.810 (0.753, 0.866) | 16.1 (13.8, 18.5)                                                                    | 4.1 (2.5, 5.7)                                                                              | 6 (5, 7)                                                         |

| Country    | Sex   | Standard drink size (grams) | Prevalence (%) of AUD | AUDIT cut-point | Specificity | Specificity (actual) | Sensitivity (95% UI) | People who have an AUD and a positive AUDIT score [per 100 people screened] (95% UI) | People who do not have an AUD and a positive AUDIT score [per 100 people screened] (95% UI) | Number of people needed to screen to treat one AUD case (95% UI) |
|------------|-------|-----------------------------|-----------------------|-----------------|-------------|----------------------|----------------------|--------------------------------------------------------------------------------------|---------------------------------------------------------------------------------------------|------------------------------------------------------------------|
| Luxembourg | Women | 10                          | 19.9                  | 19              | 0.98        | 0.981                | 0.792 (0.719, 0.861) | 15.8 (13.3, 18.2)                                                                    | 1.5 (0.4, 3.0)                                                                              | 6 (5, 8)                                                         |
|            |       | 10                          | 3.6                   | 7               | 0.90        | 0.889                | 0.848 (0.812, 0.881) | 3.1 (2.2, 4.1)                                                                       | 10.7 (8.5, 13.2)                                                                            | 33 (24, 45)                                                      |
|            |       | 10                          | 3.6                   | 9               | 0.95        | 0.944                | 0.810 (0.764, 0.853) | 2.9 (2.1, 4.0)                                                                       | 5.4 (3.5, 7.6)                                                                              | 34 (25, 47)                                                      |
|            |       | 10                          | 3.6                   | 11              | 0.98        | 0.979                | 0.773 (0.711, 0.831) | 2.8 (2.0, 3.8)                                                                       | 2.1 (0.7, 3.9)                                                                              | 36 (26, 50)                                                      |
|            | Men   | 12.8                        | 10.5                  | 12              | 0.90        | 0.908                | 0.788 (0.743, 0.829) | 8.3 (6.8, 10.0)                                                                      | 8.3 (6.5, 10.2)                                                                             | 12 (10, 15)                                                      |
|            |       | 12.8                        | 10.5                  | 15              | 0.95        | 0.956                | 0.766 (0.707, 0.822) | 8.1 (6.6, 9.7)                                                                       | 3.9 (2.4, 5.7)                                                                              | 12 (10, 15)                                                      |
|            |       | 12.8                        | 10.5                  | 17              | 0.98        | 0.978                | 0.752 (0.682, 0.817) | 7.9 (6.4, 9.6)                                                                       | 2 (0.7, 3.7)                                                                                | 13 (10, 16)                                                      |
|            |       | 12.8                        | 2.7                   | 7               | 0.90        | 0.893                | 0.780 (0.741, 0.812) | 2.1 (1.5, 3.1)                                                                       | 10.4 (8.7, 12.4)                                                                            | 47 (33, 68)                                                      |
| Madagascar | Men   | 12.8                        | 2.7                   | 9               | 0.95        | 0.947                | 0.736 (0.690, 0.781) | 2 (1.4, 2.9)                                                                         | 5.2 (3.5, 6.9)                                                                              | 50 (34, 72)                                                      |
|            |       | 12.8                        | 2.7                   | 11              | 0.98        | 0.981                | 0.696 (0.632, 0.755) | 1.9 (1.3, 2.7)                                                                       | 1.9 (0.7, 3.5)                                                                              | 53 (36, 77)                                                      |
|            |       | 10                          | 4.7                   | 13              | 0.90        | 0.901                | 0.829 (0.784, 0.870) | 3.9 (2.9, 5.1)                                                                       | 9.5 (7.5, 11.5)                                                                             | 26 (20, 35)                                                      |
|            |       | 10                          | 4.7                   | 16              | 0.95        | 0.949                | 0.810 (0.753, 0.866) | 3.8 (2.8, 5.0)                                                                       | 4.8 (3.0, 6.8)                                                                              | 26 (20, 36)                                                      |
|            | Women | 10                          | 4.7                   | 19              | 0.98        | 0.981                | 0.792 (0.719, 0.861) | 3.7 (2.7, 4.9)                                                                       | 1.8 (0.5, 3.5)                                                                              | 27 (20, 36)                                                      |
|            |       | 10                          | 0.5                   | 7               | 0.90        | 0.889                | 0.848 (0.812, 0.881) | 0.4 (0.2, 0.9)                                                                       | 11.1 (8.8, 13.7)                                                                            | 237 (107, 574)                                                   |
|            |       | 10                          | 0.5                   | 9               | 0.95        | 0.944                | 0.810 (0.764, 0.853) | 0.4 (0.2, 0.9)                                                                       | 5.6 (3.6, 7.9)                                                                              | 248 (113, 594)                                                   |
|            |       | 10                          | 0.5                   | 11              | 0.98        | 0.979                | 0.773 (0.711, 0.831) | 0.4 (0.2, 0.8)                                                                       | 2.1 (0.7, 4.0)                                                                              | 260 (120, 624)                                                   |
| Malawi     | Men   | 10                          | 6.3                   | 13              | 0.90        | 0.901                | 0.829 (0.784, 0.870) | 5.2 (4.0, 6.7)                                                                       | 9.3 (7.4, 11.4)                                                                             | 19 (15, 25)                                                      |
|            |       | 10                          | 6.3                   | 16              | 0.95        | 0.949                | 0.810 (0.753, 0.866) | 5.1 (3.9, 6.5)                                                                       | 4.8 (3.0, 6.7)                                                                              | 20 (15, 26)                                                      |
|            |       | 10                          | 6.3                   | 19              | 0.98        | 0.981                | 0.792 (0.719, 0.861) | 5 (3.8, 6.4)                                                                         | 1.8 (0.5, 3.5)                                                                              | 20 (16, 26)                                                      |
|            | Women | 10                          | 0.8                   | 7               | 0.90        | 0.889                | 0.848 (0.812, 0.881) | 0.6 (0.3, 1.3)                                                                       | 11 (8.8, 13.7)                                                                              | 157 (79, 310)                                                    |
|            |       | 10                          | 0.8                   | 9               | 0.95        | 0.944                | 0.810 (0.764, 0.853) | 0.6 (0.3, 1.2)                                                                       | 5.6 (3.6, 7.9)                                                                              | 165 (83, 325)                                                    |
|            |       | 10                          | 0.7                   | 11              | 0.98        | 0.979                | 0.773 (0.711, 0.831) | 0.6 (0.3, 1.2)                                                                       | 2.1 (0.7, 4.0)                                                                              | 173 (86, 340)                                                    |

| Country  | Sex   | Standard drink size (grams) | Prevalence (%) of AUD | AUDIT cut-point | Specificity | Specificity (actual) | Sensitivity (95% UI) | People who have an AUD and a positive AUDIT score [per 100 people screened] (95% UI) | People who do not have an AUD and a positive AUDIT score [per 100 people screened] (95% UI) | Number of people needed to screen to treat one AUD case (95% UI) |
|----------|-------|-----------------------------|-----------------------|-----------------|-------------|----------------------|----------------------|--------------------------------------------------------------------------------------|---------------------------------------------------------------------------------------------|------------------------------------------------------------------|
| Malaysia | Men   | 10                          | 5.0                   | 13              | 0.90        | 0.901                | 0.829 (0.784, 0.870) | 4.2 (3.1, 5.7)                                                                       | 9.4 (7.5, 11.5)                                                                             | 24 (18, 32)                                                      |
|          |       | 10                          | 5.0                   | 16              | 0.95        | 0.949                | 0.810 (0.753, 0.866) | 4.1 (3.0, 5.6)                                                                       | 4.8 (3.0, 6.8)                                                                              | 25 (18, 33)                                                      |
|          |       | 10                          | 5.0                   | 19              | 0.98        | 0.981                | 0.792 (0.719, 0.861) | 4 (2.9, 5.5)                                                                         | 1.8 (0.5, 3.5)                                                                              | 25 (18, 34)                                                      |
|          | Women | 10                          | 1.0                   | 7               | 0.90        | 0.889                | 0.848 (0.812, 0.881) | 0.8 (0.4, 1.5)                                                                       | 11 (8.7, 13.6)                                                                              | 120 (67, 223)                                                    |
|          |       | 10                          | 1.0                   | 9               | 0.95        | 0.944                | 0.810 (0.764, 0.853) | 0.8 (0.4, 1.4)                                                                       | 5.5 (3.6, 7.8)                                                                              | 125 (70, 232)                                                    |
|          |       | 10                          | 1.0                   | 11              | 0.98        | 0.979                | 0.773 (0.711, 0.831) | 0.8 (0.4, 1.4)                                                                       | 2.1 (0.7, 4.0)                                                                              | 131 (73, 244)                                                    |
| Maldives | Men   | 10                          | 3.9                   | 13              | 0.90        | 0.901                | 0.829 (0.784, 0.870) | 3.3 (2.3, 4.4)                                                                       | 9.5 (7.6, 11.6)                                                                             | 31 (23, 43)                                                      |
|          |       | 10                          | 3.9                   | 16              | 0.95        | 0.949                | 0.810 (0.753, 0.866) | 3.2 (2.3, 4.3)                                                                       | 4.9 (3.0, 6.8)                                                                              | 31 (23, 44)                                                      |
|          |       | 10                          | 3.9                   | 19              | 0.98        | 0.981                | 0.792 (0.719, 0.861) | 3.1 (2.2, 4.2)                                                                       | 1.8 (0.5, 3.5)                                                                              | 32 (24, 45)                                                      |
|          | Women | 10                          | 0.8                   | 7               | 0.90        | 0.889                | 0.848 (0.812, 0.881) | 0.7 (0.3, 1.4)                                                                       | 11 (8.7, 13.6)                                                                              | 149 (73, 298)                                                    |
|          |       | 10                          | 0.8                   | 9               | 0.95        | 0.944                | 0.810 (0.764, 0.853) | 0.6 (0.3, 1.3)                                                                       | 5.6 (3.6, 7.8)                                                                              | 156 (75, 313)                                                    |
|          |       | 10                          | 0.8                   | 11              | 0.98        | 0.979                | 0.773 (0.711, 0.831) | 0.6 (0.3, 1.3)                                                                       | 2.1 (0.7, 4.0)                                                                              | 164 (79, 330)                                                    |
| Mali     | Men   | 10                          | 1.5                   | 13              | 0.90        | 0.901                | 0.829 (0.784, 0.870) | 1.2 (0.7, 2.0)                                                                       | 9.8 (7.8, 11.9)                                                                             | 82 (50, 134)                                                     |
|          |       | 10                          | 1.5                   | 16              | 0.95        | 0.949                | 0.810 (0.753, 0.866) | 1.2 (0.7, 1.9)                                                                       | 5 (3.1, 7.0)                                                                                | 84 (51, 137)                                                     |
|          |       | 10                          | 1.5                   | 19              | 0.98        | 0.981                | 0.792 (0.719, 0.861) | 1.2 (0.7, 1.9)                                                                       | 1.9 (0.5, 3.6)                                                                              | 86 (53, 142)                                                     |
|          | Women | 10                          | 0.0                   | 7               | 0.90        | 0.889                | 0.848 (0.812, 0.881) | <0.1 (<0.1, 0.9)                                                                     | 11.1 (8.8, 13.7)                                                                            | 2887 (114, 84904)                                                |
|          |       | 10                          | 0.0                   | 9               | 0.95        | 0.944                | 0.810 (0.764, 0.853) | <0.1 (<0.1, 0.8)                                                                     | 5.6 (3.6, 7.9)                                                                              | 3024 (120, 89545)                                                |
|          |       | 10                          | 0.0                   | 11              | 0.98        | 0.979                | 0.773 (0.711, 0.831) | <0.1 (<0.1, 0.8)                                                                     | 2.1 (0.7, 4.1)                                                                              | 3168 (123, 92224)                                                |
| Malta    | Men   | 9                           | 5.6                   | 13              | 0.90        | 0.891                | 0.846 (0.795, 0.892) | 4.7 (3.7, 6.1)                                                                       | 10.3 (8.0, 12.8)                                                                            | 21 (16, 27)                                                      |
|          |       | 9                           | 5.6                   | 17              | 0.95        | 0.955                | 0.821 (0.756, 0.882) | 4.6 (3.5, 5.9)                                                                       | 4.3 (2.4, 6.5)                                                                              | 22 (17, 29)                                                      |
|          |       | 9                           | 5.6                   | 20              | 0.98        | 0.984                | 0.804 (0.726, 0.877) | 4.5 (3.4, 5.8)                                                                       | 1.5 (0.3, 3.3)                                                                              | 22 (17, 30)                                                      |
|          | Women | 9                           | 1.6                   | 7               | 0.90        | 0.887                | 0.870 (0.823, 0.912) | 1.4 (0.8, 2.2)                                                                       | 11.1 (8.2, 14.4)                                                                            | 73 (45, 118)                                                     |

| Country                          | Sex   | Standard drink size (grams) | Prevalence (%) of AUD | AUDIT cut-point | Specificity | Specificity (actual) | Sensitivity (95% UI) | People who have an AUD and a positive AUDIT score [per 100 people screened] (95% UI) | People who do not have an AUD and a positive AUDIT score [per 100 people screened] (95% UI) | Number of people needed to screen to treat one AUD case (95% UI) |
|----------------------------------|-------|-----------------------------|-----------------------|-----------------|-------------|----------------------|----------------------|--------------------------------------------------------------------------------------|---------------------------------------------------------------------------------------------|------------------------------------------------------------------|
| Mauritania                       | Men   | 9                           | 1.6                   | 9               | 0.95        | 0.943                | 0.834 (0.776, 0.885) | 1.3 (0.8, 2.2)                                                                       | 5.6 (3.4, 8.4)                                                                              | 76 (46, 124)                                                     |
|                                  |       | 9                           | 1.6                   | 11              | 0.98        | 0.978                | 0.798 (0.727, 0.863) | 1.3 (0.8, 2.1)                                                                       | 2.2 (0.6, 4.5)                                                                              | 79 (49, 130)                                                     |
|                                  |       | 10                          | 0.7                   | 13              | 0.90        | 0.901                | 0.829 (0.784, 0.870) | 0.6 (0.3, 1.1)                                                                       | 9.9 (7.9, 12.0)                                                                             | 180 (89, 384)                                                    |
|                                  | Women | 10                          | 0.7                   | 16              | 0.95        | 0.949                | 0.810 (0.753, 0.866) | 0.5 (0.3, 1.1)                                                                       | 5 (3.1, 7.1)                                                                                | 184 (92, 397)                                                    |
|                                  |       | 10                          | 0.7                   | 19              | 0.98        | 0.981                | 0.792 (0.719, 0.861) | 0.5 (0.2, 1.1)                                                                       | 1.9 (0.5, 3.7)                                                                              | 189 (94, 405)                                                    |
|                                  |       | 10                          | 0.1                   | 7               | 0.90        | 0.889                | 0.848 (0.812, 0.881) | 0.1 (<0.1, 0.6)                                                                      | 11.1 (8.8, 13.7)                                                                            | 949 (154, 5359)                                                  |
| Mauritius                        | Men   | 10                          | 0.1                   | 9               | 0.95        | 0.944                | 0.810 (0.764, 0.853) | 0.1 (<0.1, 0.6)                                                                      | 5.6 (3.6, 7.9)                                                                              | 994 (162, 5723)                                                  |
|                                  |       | 10                          | 0.1                   | 11              | 0.98        | 0.979                | 0.773 (0.711, 0.831) | 0.1 (<0.1, 0.6)                                                                      | 2.1 (0.7, 4.1)                                                                              | 1042 (171, 5888)                                                 |
|                                  |       | 10                          | 9.8                   | 13              | 0.90        | 0.901                | 0.829 (0.784, 0.870) | 8.2 (6.7, 9.9)                                                                       | 9 (7.1, 10.9)                                                                               | 12 (10, 15)                                                      |
|                                  | Women | 10                          | 9.8                   | 16              | 0.95        | 0.949                | 0.810 (0.753, 0.866) | 8 (6.5, 9.6)                                                                         | 4.6 (2.9, 6.4)                                                                              | 13 (10, 15)                                                      |
|                                  |       | 10                          | 9.8                   | 19              | 0.98        | 0.981                | 0.792 (0.719, 0.861) | 7.8 (6.3, 9.4)                                                                       | 1.7 (0.5, 3.3)                                                                              | 13 (11, 16)                                                      |
|                                  |       | 10                          | 1.4                   | 7               | 0.90        | 0.889                | 0.848 (0.812, 0.881) | 1.2 (0.7, 2.0)                                                                       | 11 (8.6, 13.6)                                                                              | 84 (50, 139)                                                     |
| Mexico                           | Men   | 10                          | 1.4                   | 9               | 0.95        | 0.944                | 0.810 (0.764, 0.853) | 1.1 (0.7, 1.9)                                                                       | 5.5 (3.6, 7.8)                                                                              | 88 (52, 145)                                                     |
|                                  |       | 10                          | 1.4                   | 11              | 0.98        | 0.979                | 0.773 (0.711, 0.831) | 1.1 (0.7, 1.8)                                                                       | 2.1 (0.7, 4.0)                                                                              | 93 (54, 153)                                                     |
|                                  |       | 14                          | 4.3                   | 11              | 0.90        | 0.899                | 0.773 (0.717, 0.823) | 3.3 (2.5, 4.5)                                                                       | 9.7 (7.4, 12.0)                                                                             | 30 (22, 40)                                                      |
|                                  | Women | 14                          | 4.3                   | 14              | 0.95        | 0.951                | 0.750 (0.683, 0.814) | 3.2 (2.4, 4.4)                                                                       | 4.7 (2.7, 7.0)                                                                              | 31 (23, 42)                                                      |
|                                  |       | 14                          | 4.3                   | 17              | 0.98        | 0.983                | 0.729 (0.646, 0.806) | 3.1 (2.3, 4.3)                                                                       | 1.6 (0.3, 3.4)                                                                              | 32 (23, 43)                                                      |
|                                  |       | 14                          | 0.4                   | 7               | 0.90        | 0.895                | 0.748 (0.691, 0.797) | 0.3 (0.1, 0.8)                                                                       | 10.5 (8.0, 13.2)                                                                            | 334 (126, 847)                                                   |
| Micronesia (Federated States of) | Men   | 14                          | 0.4                   | 9               | 0.95        | 0.948                | 0.703 (0.640, 0.758) | 0.3 (0.1, 0.8)                                                                       | 5.2 (3.2, 7.5)                                                                              | 356 (133, 906)                                                   |
|                                  |       | 14                          | 0.4                   | 11              | 0.98        | 0.981                | 0.661 (0.584, 0.730) | 0.3 (0.1, 0.7)                                                                       | 1.8 (0.6, 3.7)                                                                              | 378 (140, 963)                                                   |
|                                  |       | 10                          | 8.6                   | 13              | 0.90        | 0.901                | 0.829 (0.784, 0.870) | 7.2 (5.7, 8.8)                                                                       | 9.1 (7.2, 11.1)                                                                             | 14 (11, 17)                                                      |

| Country    | Sex   | Standard drink size (grams) | Prevalence (%) of AUD | AUDIT cut-point | Specificity | Specificity (actual) | Sensitivity (95% UI) | People who have an AUD and a positive AUDIT score [per 100 people screened] (95% UI) | People who do not have an AUD and a positive AUDIT score [per 100 people screened] (95% UI) | Number of people needed to screen to treat one AUD case (95% UI) |             |
|------------|-------|-----------------------------|-----------------------|-----------------|-------------|----------------------|----------------------|--------------------------------------------------------------------------------------|---------------------------------------------------------------------------------------------|------------------------------------------------------------------|-------------|
| Mongolia   | Women | 10                          | 8.6                   | 16              | 0.95        | 0.949                | 0.810 (0.753, 0.866) | 7 (5.6, 8.5)                                                                         | 4.6 (2.9, 6.5)                                                                              | 14 (12, 18)                                                      |             |
|            |       | 10                          | 8.6                   | 19              | 0.98        | 0.981                | 0.792 (0.719, 0.861) | 6.8 (5.4, 8.4)                                                                       | 1.8 (0.5, 3.4)                                                                              | 15 (12, 18)                                                      |             |
|            |       | 10                          | 1.8                   | 7               | 0.90        | 0.889                | 0.848 (0.812, 0.881) | 1.5 (0.9, 2.3)                                                                       | 10.9 (8.7, 13.5)                                                                            | 67 (43, 108)                                                     |             |
|            |       | 10                          | 1.8                   | 9               | 0.95        | 0.944                | 0.810 (0.764, 0.853) | 1.4 (0.9, 2.2)                                                                       | 5.5 (3.6, 7.8)                                                                              | 70 (44, 114)                                                     |             |
|            |       | 10                          | 1.8                   | 11              | 0.98        | 0.979                | 0.773 (0.711, 0.831) | 1.4 (0.8, 2.1)                                                                       | 2.1 (0.7, 4.0)                                                                              | 73 (47, 120)                                                     |             |
|            | Men   | 10                          | 13.3                  | 13              | 0.90        | 0.901                | 0.829 (0.784, 0.870) | 11 (9.3, 13.0)                                                                       | 8.6 (6.8, 10.5)                                                                             | 9 (8, 11)                                                        |             |
|            |       | 10                          | 13.3                  | 16              | 0.95        | 0.949                | 0.810 (0.753, 0.866) | 10.8 (9.0, 12.8)                                                                     | 4.4 (2.7, 6.1)                                                                              | 9 (8, 11)                                                        |             |
|            |       | 10                          | 13.3                  | 19              | 0.98        | 0.981                | 0.792 (0.719, 0.861) | 10.5 (8.7, 12.6)                                                                     | 1.7 (0.5, 3.2)                                                                              | 9 (8, 11)                                                        |             |
|            |       | Women                       | 10                    | 2.5             | 7           | 0.90                 | 0.889                | 0.848 (0.812, 0.881)                                                                 | 2.2 (1.5, 3.1)                                                                              | 10.8 (8.6, 13.4)                                                 | 46 (32, 67) |
|            |       |                             | 10                    | 2.5             | 9           | 0.95                 | 0.944                | 0.810 (0.764, 0.853)                                                                 | 2.1 (1.4, 3.0)                                                                              | 5.5 (3.5, 7.7)                                                   | 49 (33, 71) |
| Montenegro | Men   | 10                          | 2.5                   | 11              | 0.98        | 0.979                | 0.773 (0.711, 0.831) | 2 (1.3, 2.8)                                                                         | 2.1 (0.7, 4.0)                                                                              | 51 (35, 75)                                                      |             |
|            |       | 10                          | 9.9                   | 13              | 0.90        | 0.901                | 0.829 (0.784, 0.870) | 8.2 (6.7, 9.9)                                                                       | 8.9 (7.1, 10.9)                                                                             | 12 (10, 15)                                                      |             |
|            |       | 10                          | 9.9                   | 16              | 0.95        | 0.949                | 0.810 (0.753, 0.866) | 8 (6.5, 9.7)                                                                         | 4.6 (2.8, 6.5)                                                                              | 12 (10, 15)                                                      |             |
|            |       | 10                          | 9.9                   | 19              | 0.98        | 0.981                | 0.792 (0.719, 0.861) | 7.9 (6.3, 9.6)                                                                       | 1.7 (0.5, 3.3)                                                                              | 13 (10, 16)                                                      |             |
|            |       | Women                       | 10                    | 2.2             | 7           | 0.90                 | 0.889                | 0.848 (0.812, 0.881)                                                                 | 1.8 (1.2, 2.8)                                                                              | 10.9 (8.6, 13.5)                                                 | 55 (36, 86) |
|            | 10    |                             | 2.2                   | 9               | 0.95        | 0.944                | 0.810 (0.764, 0.853) | 1.7 (1.1, 2.7)                                                                       | 5.5 (3.5, 7.8)                                                                              | 57 (38, 90)                                                      |             |
|            | Men   | 10                          | 2.2                   | 11              | 0.98        | 0.979                | 0.773 (0.711, 0.831) | 1.7 (1.1, 2.5)                                                                       | 2.1 (0.7, 4.0)                                                                              | 60 (40, 94)                                                      |             |
|            |       | 10                          | 0.8                   | 13              | 0.90        | 0.901                | 0.829 (0.784, 0.870) | 0.6 (0.3, 1.3)                                                                       | 9.9 (7.8, 12.0)                                                                             | 156 (75, 315)                                                    |             |
|            |       | 10                          | 0.8                   | 16              | 0.95        | 0.949                | 0.810 (0.753, 0.866) | 0.6 (0.3, 1.3)                                                                       | 5 (3.1, 7.1)                                                                                | 160 (77, 327)                                                    |             |
|            |       | 10                          | 0.8                   | 19              | 0.98        | 0.981                | 0.792 (0.719, 0.861) | 0.6 (0.3, 1.3)                                                                       | 1.9 (0.5, 3.7)                                                                              | 164 (79, 332)                                                    |             |
| Women      |       | 10                          | 0.1                   | 7               | 0.90        | 0.889                | 0.848 (0.812, 0.881) | 0.1 (<0.1, 0.6)                                                                      | 11.1 (8.8, 13.7)                                                                            | 858 (172, 5287)                                                  |             |
|            | 10    | 0.1                         | 9                     | 0.95            | 0.944       | 0.810 (0.764, 0.853) | 0.1 (<0.1, 0.6)      | 5.6 (3.6, 7.9)                                                                       | 899 (180, 5559)                                                                             |                                                                  |             |

| Country    | Sex   | Standard drink size (grams) | Prevalence (%) of AUD | AUDIT cut-point | Specificity | Specificity (actual) | Sensitivity (95% UI) | People who have an AUD and a positive AUDIT score [per 100 people screened] (95% UI) | People who do not have an AUD and a positive AUDIT score [per 100 people screened] (95% UI) | Number of people needed to screen to treat one AUD case (95% UI) |
|------------|-------|-----------------------------|-----------------------|-----------------|-------------|----------------------|----------------------|--------------------------------------------------------------------------------------|---------------------------------------------------------------------------------------------|------------------------------------------------------------------|
| Mozambique | Men   | 10                          | 0.1                   | 11              | 0.98        | 0.979                | 0.773 (0.711, 0.831) | 0.1 (<0.1, 0.5)                                                                      | 2.1 (0.7, 4.1)                                                                              | 942 (187, 5838)                                                  |
|            |       | 10                          | 5.9                   | 13              | 0.90        | 0.901                | 0.829 (0.784, 0.870) | 4.9 (3.9, 6.3)                                                                       | 9.3 (7.4, 11.5)                                                                             | 20 (16, 26)                                                      |
|            |       | 10                          | 5.9                   | 16              | 0.95        | 0.949                | 0.810 (0.753, 0.866) | 4.8 (3.7, 6.1)                                                                       | 4.8 (3.0, 6.7)                                                                              | 21 (16, 27)                                                      |
|            | Women | 10                          | 5.9                   | 19              | 0.98        | 0.981                | 0.792 (0.719, 0.861) | 4.7 (3.6, 6.0)                                                                       | 1.8 (0.5, 3.5)                                                                              | 21 (17, 28)                                                      |
|            |       | 10                          | 0.7                   | 7               | 0.90        | 0.889                | 0.848 (0.812, 0.881) | 0.6 (0.3, 1.2)                                                                       | 11 (8.8, 13.6)                                                                              | 172 (85, 370)                                                    |
|            |       | 10                          | 0.7                   | 9               | 0.95        | 0.944                | 0.810 (0.764, 0.853) | 0.6 (0.3, 1.1)                                                                       | 5.6 (3.6, 7.8)                                                                              | 180 (89, 386)                                                    |
| Myanmar    | Men   | 10                          | 0.7                   | 11              | 0.98        | 0.979                | 0.773 (0.711, 0.831) | 0.5 (0.2, 1.1)                                                                       | 2.1 (0.7, 4.0)                                                                              | 188 (94, 405)                                                    |
|            |       | 10                          | 3.2                   | 13              | 0.90        | 0.901                | 0.829 (0.784, 0.870) | 2.7 (1.8, 3.7)                                                                       | 9.6 (7.6, 11.7)                                                                             | 37 (27, 55)                                                      |
|            |       | 10                          | 3.2                   | 16              | 0.95        | 0.949                | 0.810 (0.753, 0.866) | 2.6 (1.8, 3.7)                                                                       | 4.9 (3.0, 6.9)                                                                              | 38 (27, 56)                                                      |
|            | Women | 10                          | 3.2                   | 19              | 0.98        | 0.981                | 0.792 (0.719, 0.861) | 2.6 (1.7, 3.6)                                                                       | 1.9 (0.5, 3.6)                                                                              | 39 (28, 57)                                                      |
|            |       | 10                          | 0.6                   | 7               | 0.90        | 0.889                | 0.848 (0.812, 0.881) | 0.5 (0.2, 1.2)                                                                       | 11.1 (8.7, 13.6)                                                                            | 195 (84, 429)                                                    |
|            |       | 10                          | 0.6                   | 9               | 0.95        | 0.944                | 0.810 (0.764, 0.853) | 0.5 (0.2, 1.1)                                                                       | 5.6 (3.6, 7.8)                                                                              | 204 (89, 450)                                                    |
| Nauru      | Men   | 10                          | 0.6                   | 11              | 0.98        | 0.979                | 0.773 (0.711, 0.831) | 0.5 (0.2, 1.1)                                                                       | 2.1 (0.7, 4.0)                                                                              | 214 (92, 471)                                                    |
|            |       | 10                          | 8.9                   | 13              | 0.90        | 0.901                | 0.829 (0.784, 0.870) | 7.4 (6.0, 9.0)                                                                       | 9 (7.2, 11.0)                                                                               | 13 (11, 17)                                                      |
|            |       | 10                          | 8.9                   | 16              | 0.95        | 0.949                | 0.810 (0.753, 0.866) | 7.2 (5.9, 8.9)                                                                       | 4.6 (2.9, 6.5)                                                                              | 14 (11, 17)                                                      |
|            | Women | 10                          | 8.9                   | 19              | 0.98        | 0.981                | 0.792 (0.719, 0.861) | 7.1 (5.7, 8.7)                                                                       | 1.7 (0.5, 3.3)                                                                              | 14 (12, 18)                                                      |
|            |       | 10                          | 1.8                   | 7               | 0.90        | 0.889                | 0.848 (0.812, 0.881) | 1.5 (0.9, 2.3)                                                                       | 10.9 (8.6, 13.5)                                                                            | 67 (43, 108)                                                     |
|            |       | 10                          | 1.8                   | 9               | 0.95        | 0.944                | 0.810 (0.764, 0.853) | 1.4 (0.9, 2.2)                                                                       | 5.5 (3.6, 7.8)                                                                              | 70 (45, 112)                                                     |
| Nepal      | Men   | 10                          | 1.8                   | 11              | 0.98        | 0.979                | 0.773 (0.711, 0.831) | 1.4 (0.8, 2.1)                                                                       | 2.1 (0.7, 4.0)                                                                              | 74 (47, 118)                                                     |
|            |       | 10                          | 3.1                   | 13              | 0.90        | 0.901                | 0.829 (0.784, 0.870) | 2.5 (1.8, 3.6)                                                                       | 9.6 (7.7, 11.7)                                                                             | 39 (28, 57)                                                      |
|            |       | 10                          | 3.1                   | 16              | 0.95        | 0.949                | 0.810 (0.753, 0.866) | 2.5 (1.7, 3.5)                                                                       | 4.9 (3.1, 6.9)                                                                              | 40 (28, 58)                                                      |
|            | Women | 10                          | 3.1                   | 19              | 0.98        | 0.981                | 0.792 (0.719, 0.861) | 2.4 (1.7, 3.5)                                                                       | 1.9 (0.5, 3.6)                                                                              | 41 (29, 59)                                                      |

| Country     | Sex         | Standard drink size (grams) | Prevalence (%) of AUD | AUDIT cut-point | Specificity | Specificity (actual) | Sensitivity (95% UI) | People who have an AUD and a positive AUDIT score [per 100 people screened] (95% UI) | People who do not have an AUD and a positive AUDIT score [per 100 people screened] (95% UI) | Number of people needed to screen to treat one AUD case (95% UI) |               |
|-------------|-------------|-----------------------------|-----------------------|-----------------|-------------|----------------------|----------------------|--------------------------------------------------------------------------------------|---------------------------------------------------------------------------------------------|------------------------------------------------------------------|---------------|
| Netherlands | Women       | 10                          | 0.6                   | 7               | 0.90        | 0.889                | 0.848 (0.812, 0.881) | 0.5 (0.2, 1.1)                                                                       | 11.1 (8.7, 13.7)                                                                            | 197 (89, 437)                                                    |               |
|             |             | 10                          | 0.6                   | 9               | 0.95        | 0.944                | 0.810 (0.764, 0.853) | 0.5 (0.2, 1.1)                                                                       | 5.6 (3.6, 7.9)                                                                              | 206 (93, 452)                                                    |               |
|             |             | 10                          | 0.6                   | 11              | 0.98        | 0.979                | 0.773 (0.711, 0.831) | 0.5 (0.2, 1.0)                                                                       | 2.1 (0.7, 4.0)                                                                              | 216 (97, 480)                                                    |               |
|             | Men         | 10                          | 2.0                   | 13              | 0.90        | 0.901                | 0.829 (0.784, 0.870) | 1.7 (1.1, 2.5)                                                                       | 9.7 (7.7, 11.9)                                                                             | 60 (40, 92)                                                      |               |
|             |             | 10                          | 2.0                   | 16              | 0.95        | 0.949                | 0.810 (0.753, 0.866) | 1.6 (1.1, 2.5)                                                                       | 5 (3.1, 7.0)                                                                                | 61 (41, 94)                                                      |               |
|             |             | 10                          | 2.0                   | 19              | 0.98        | 0.981                | 0.792 (0.719, 0.861) | 1.6 (1.0, 2.4)                                                                       | 1.9 (0.5, 3.6)                                                                              | 63 (41, 96)                                                      |               |
|             | New Zealand | Women                       | 10                    | 0.9             | 7           | 0.90                 | 0.889                | 0.848 (0.812, 0.881)                                                                 | 0.8 (0.4, 1.5)                                                                              | 11 (8.7, 13.6)                                                   | 131 (67, 258) |
|             |             |                             | 10                    | 0.9             | 9           | 0.95                 | 0.944                | 0.810 (0.764, 0.853)                                                                 | 0.7 (0.4, 1.4)                                                                              | 5.6 (3.6, 7.9)                                                   | 137 (70, 271) |
|             |             |                             | 10                    | 0.9             | 11          | 0.98                 | 0.979                | 0.773 (0.711, 0.831)                                                                 | 0.7 (0.4, 1.4)                                                                              | 2.1 (0.7, 4.0)                                                   | 144 (74, 284) |
| Men         |             | 10                          | 5.6                   | 13              | 0.90        | 0.901                | 0.829 (0.784, 0.870) | 4.6 (3.6, 5.9)                                                                       | 9.4 (7.4, 11.4)                                                                             | 22 (17, 28)                                                      |               |
|             |             | 10                          | 5.6                   | 16              | 0.95        | 0.949                | 0.810 (0.753, 0.866) | 4.5 (3.5, 5.8)                                                                       | 4.8 (3.0, 6.7)                                                                              | 22 (17, 29)                                                      |               |
|             |             | 10                          | 5.6                   | 19              | 0.98        | 0.981                | 0.792 (0.719, 0.861) | 4.4 (3.4, 5.7)                                                                       | 1.8 (0.5, 3.5)                                                                              | 23 (17, 30)                                                      |               |
| Nicaragua   | Women       | 10                          | 2.5                   | 7               | 0.90        | 0.889                | 0.848 (0.812, 0.881) | 2.1 (1.4, 3.1)                                                                       | 10.8 (8.6, 13.4)                                                                            | 47 (32, 70)                                                      |               |
|             |             | 10                          | 2.5                   | 9               | 0.95        | 0.944                | 0.810 (0.764, 0.853) | 2 (1.4, 3.0)                                                                         | 5.5 (3.5, 7.7)                                                                              | 50 (34, 74)                                                      |               |
|             |             | 10                          | 2.5                   | 11              | 0.98        | 0.979                | 0.773 (0.711, 0.831) | 1.9 (1.3, 2.9)                                                                       | 2.1 (0.7, 4.0)                                                                              | 52 (35, 77)                                                      |               |
|             | Men         | 10                          | 9.7                   | 13              | 0.90        | 0.901                | 0.829 (0.784, 0.870) | 8.1 (6.6, 9.8)                                                                       | 9 (7.1, 11.0)                                                                               | 12 (10, 15)                                                      |               |
|             |             | 10                          | 9.7                   | 16              | 0.95        | 0.949                | 0.810 (0.753, 0.866) | 7.9 (6.5, 9.6)                                                                       | 4.6 (2.8, 6.4)                                                                              | 13 (10, 15)                                                      |               |
|             |             | 10                          | 9.7                   | 19              | 0.98        | 0.981                | 0.792 (0.719, 0.861) | 7.7 (6.3, 9.4)                                                                       | 1.7 (0.5, 3.3)                                                                              | 13 (11, 16)                                                      |               |
|             | Women       | 10                          | 3.7                   | 7               | 0.90        | 0.889                | 0.848 (0.812, 0.881) | 3.1 (2.3, 4.3)                                                                       | 10.7 (8.5, 13.2)                                                                            | 32 (23, 44)                                                      |               |
|             |             | 10                          | 3.7                   | 9               | 0.95        | 0.944                | 0.810 (0.764, 0.853) | 3 (2.1, 4.1)                                                                         | 5.4 (3.5, 7.7)                                                                              | 33 (25, 47)                                                      |               |
|             |             | 10                          | 3.7                   | 11              | 0.98        | 0.979                | 0.773 (0.711, 0.831) | 2.9 (2.0, 3.9)                                                                       | 2.1 (0.7, 3.9)                                                                              | 35 (26, 49)                                                      |               |
| Niger       | Men         | 10                          | 1.4                   | 13              | 0.90        | 0.901                | 0.829 (0.784, 0.870) | 1.2 (0.7, 2.0)                                                                       | 9.8 (7.8, 11.9)                                                                             | 83 (50, 146)                                                     |               |

| Country | Sex   | Standard drink size (grams) | Prevalence (%) of AUD | AUDIT cut-point | Specificity | Specificity (actual) | Sensitivity (95% UI) | People who have an AUD and a positive AUDIT score [per 100 people screened] (95% UI) | People who do not have an AUD and a positive AUDIT score [per 100 people screened] (95% UI) | Number of people needed to screen to treat one AUD case (95% UI) |
|---------|-------|-----------------------------|-----------------------|-----------------|-------------|----------------------|----------------------|--------------------------------------------------------------------------------------|---------------------------------------------------------------------------------------------|------------------------------------------------------------------|
| Nigeria | Women | 10                          | 1.4                   | 16              | 0.95        | 0.949                | 0.810 (0.753, 0.866) | 1.2 (0.7, 2.0)                                                                       | 5 (3.1, 7.0)                                                                                | 85 (51, 151)                                                     |
|         |       | 10                          | 1.4                   | 19              | 0.98        | 0.981                | 0.792 (0.719, 0.861) | 1.1 (0.6, 1.9)                                                                       | 1.9 (0.5, 3.6)                                                                              | 87 (53, 155)                                                     |
|         |       | 10                          | 0.0                   | 7               | 0.90        | 0.889                | 0.848 (0.812, 0.881) | <0.1 (<0.1, 0.8)                                                                     | 11.1 (8.8, 13.7)                                                                            | 3264 (119, 95020)                                                |
|         |       | 10                          | 0.0                   | 9               | 0.95        | 0.944                | 0.810 (0.764, 0.853) | <0.1 (<0.1, 0.8)                                                                     | 5.6 (3.6, 7.9)                                                                              | 3419 (125, 98772)                                                |
|         |       | 10                          | 0.0                   | 11              | 0.98        | 0.979                | 0.773 (0.711, 0.831) | <0.1 (<0.1, 0.8)                                                                     | 2.1 (0.7, 4.1)                                                                              | 3582 (130, 102258)                                               |
|         | Men   | 10                          | 1.1                   | 13              | 0.90        | 0.901                | 0.829 (0.784, 0.870) | 0.9 (0.5, 1.7)                                                                       | 9.8 (7.8, 12.0)                                                                             | 113 (59, 197)                                                    |
|         |       | 10                          | 1.1                   | 16              | 0.95        | 0.949                | 0.810 (0.753, 0.866) | 0.9 (0.5, 1.6)                                                                       | 5 (3.1, 7.1)                                                                                | 116 (61, 201)                                                    |
|         |       | 10                          | 1.1                   | 19              | 0.98        | 0.981                | 0.792 (0.719, 0.861) | 0.8 (0.5, 1.6)                                                                       | 1.9 (0.5, 3.6)                                                                              | 118 (62, 206)                                                    |
|         |       | 10                          | 0.1                   | 7               | 0.90        | 0.889                | 0.848 (0.812, 0.881) | 0.1 (<0.1, 0.6)                                                                      | 11.1 (8.8, 13.7)                                                                            | 979 (173, 6068)                                                  |
|         |       | 10                          | 0.1                   | 9               | 0.95        | 0.944                | 0.810 (0.764, 0.853) | 0.1 (<0.1, 0.5)                                                                      | 5.6 (3.6, 7.9)                                                                              | 1025 (182, 6222)                                                 |
| Niue    | Men   | 10                          | 0.1                   | 11              | 0.98        | 0.979                | 0.773 (0.711, 0.831) | 0.1 (<0.1, 0.5)                                                                      | 2.1 (0.7, 4.1)                                                                              | 1074 (192, 6370)                                                 |
|         |       | 10                          | 8.9                   | 13              | 0.90        | 0.901                | 0.829 (0.784, 0.870) | 7.4 (6.0, 9.0)                                                                       | 9 (7.2, 11.0)                                                                               | 14 (11, 17)                                                      |
|         |       | 10                          | 8.9                   | 16              | 0.95        | 0.949                | 0.810 (0.753, 0.866) | 7.2 (5.8, 8.9)                                                                       | 4.6 (2.9, 6.5)                                                                              | 14 (11, 17)                                                      |
|         | Women | 10                          | 8.9                   | 19              | 0.98        | 0.981                | 0.792 (0.719, 0.861) | 7 (5.6, 8.7)                                                                         | 1.7 (0.5, 3.4)                                                                              | 14 (12, 18)                                                      |
|         |       | 10                          | 1.8                   | 7               | 0.90        | 0.889                | 0.848 (0.812, 0.881) | 1.5 (1.0, 2.4)                                                                       | 10.9 (8.7, 13.5)                                                                            | 67 (43, 105)                                                     |
|         |       | 10                          | 1.8                   | 9               | 0.95        | 0.944                | 0.810 (0.764, 0.853) | 1.4 (0.9, 2.2)                                                                       | 5.5 (3.6, 7.8)                                                                              | 70 (45, 110)                                                     |
|         |       | 10                          | 1.8                   | 11              | 0.98        | 0.979                | 0.773 (0.711, 0.831) | 1.4 (0.9, 2.1)                                                                       | 2.1 (0.7, 4.0)                                                                              | 73 (47, 116)                                                     |
| Norway  | Men   | 13.5                        | 10.6                  | 11              | 0.90        | 0.894                | 0.783 (0.736, 0.826) | 8.3 (6.8, 10.0)                                                                      | 9.5 (7.5, 11.6)                                                                             | 12 (10, 15)                                                      |
|         |       | 13.5                        | 10.6                  | 14              | 0.95        | 0.947                | 0.760 (0.699, 0.817) | 8.1 (6.6, 9.8)                                                                       | 4.7 (2.9, 6.7)                                                                              | 12 (10, 15)                                                      |
|         |       | 13.5                        | 10.6                  | 17              | 0.98        | 0.981                | 0.739 (0.661, 0.811) | 7.8 (6.3, 9.6)                                                                       | 1.7 (0.5, 3.4)                                                                              | 13 (10, 16)                                                      |
|         | Women | 13.5                        | 3.8                   | 7               | 0.90        | 0.894                | 0.761 (0.714, 0.804) | 2.9 (2.1, 3.9)                                                                       | 10.2 (8.1, 12.5)                                                                            | 35 (26, 48)                                                      |
|         |       | 13.5                        | 3.8                   | 9               | 0.95        | 0.948                | 0.717 (0.661, 0.767) | 2.7 (2.0, 3.7)                                                                       | 5 (3.3, 7.0)                                                                                | 37 (27, 50)                                                      |



| Country  | Sex   | Standard drink size (grams) | Prevalence (%) of AUD | AUDIT cut-point | Specificity | Specificity (actual) | Sensitivity (95% UI) | People who have an AUD and a positive AUDIT score [per 100 people screened] (95% UI) | People who do not have an AUD and a positive AUDIT score [per 100 people screened] (95% UI) | Number of people needed to screen to treat one AUD case (95% UI) |
|----------|-------|-----------------------------|-----------------------|-----------------|-------------|----------------------|----------------------|--------------------------------------------------------------------------------------|---------------------------------------------------------------------------------------------|------------------------------------------------------------------|
| Oman     | Men   | 13.5                        | 3.8                   | 11              | 0.98        | 0.981                | 0.676 (0.606, 0.741) | 2.6 (1.9, 3.5)                                                                       | 1.8 (0.6, 3.5)                                                                              | 39 (29, 54)                                                      |
|          |       | 10                          | 0.6                   | 13              | 0.90        | 0.901                | 0.829 (0.784, 0.870) | 0.5 (0.2, 1.1)                                                                       | 9.9 (7.8, 12.0)                                                                             | 207 (91, 474)                                                    |
|          |       | 10                          | 0.6                   | 16              | 0.95        | 0.949                | 0.810 (0.753, 0.866) | 0.5 (0.2, 1.1)                                                                       | 5 (3.1, 7.1)                                                                                | 212 (92, 481)                                                    |
|          | Women | 10                          | 0.6                   | 19              | 0.98        | 0.981                | 0.792 (0.719, 0.861) | 0.5 (0.2, 1.1)                                                                       | 1.9 (0.5, 3.7)                                                                              | 217 (95, 491)                                                    |
|          |       | 10                          | 0.1                   | 7               | 0.90        | 0.889                | 0.848 (0.812, 0.881) | 0.1 (<0.1, 0.6)                                                                      | 11.1 (8.8, 13.7)                                                                            | 965 (161, 5909)                                                  |
|          |       | 10                          | 0.1                   | 9               | 0.95        | 0.944                | 0.810 (0.764, 0.853) | 0.1 (<0.1, 0.6)                                                                      | 5.6 (3.6, 7.9)                                                                              | 1011 (169, 6201)                                                 |
| Pakistan | Men   | 10                          | 0.1                   | 11              | 0.98        | 0.979                | 0.773 (0.711, 0.831) | 0.1 (<0.1, 0.6)                                                                      | 2.1 (0.7, 4.1)                                                                              | 1060 (177, 6504)                                                 |
|          |       | 10                          | 0.6                   | 13              | 0.90        | 0.901                | 0.829 (0.784, 0.870) | 0.5 (0.2, 1.1)                                                                       | 9.9 (7.9, 12.0)                                                                             | 195 (90, 436)                                                    |
|          |       | 10                          | 0.6                   | 16              | 0.95        | 0.949                | 0.810 (0.753, 0.866) | 0.5 (0.2, 1.1)                                                                       | 5 (3.1, 7.1)                                                                                | 200 (92, 447)                                                    |
|          | Women | 10                          | 0.6                   | 19              | 0.98        | 0.981                | 0.792 (0.719, 0.861) | 0.5 (0.2, 1.1)                                                                       | 1.9 (0.5, 3.7)                                                                              | 204 (94, 452)                                                    |
|          |       | 10                          | 0.1                   | 7               | 0.90        | 0.889                | 0.848 (0.812, 0.881) | 0.1 (<0.1, 0.7)                                                                      | 11.1 (8.8, 13.7)                                                                            | 1003 (148, 6022)                                                 |
|          |       | 10                          | 0.1                   | 9               | 0.95        | 0.944                | 0.810 (0.764, 0.853) | 0.1 (<0.1, 0.6)                                                                      | 5.6 (3.6, 7.9)                                                                              | 1050 (157, 6286)                                                 |
| Palau    | Men   | 10                          | 0.1                   | 11              | 0.98        | 0.979                | 0.773 (0.711, 0.831) | 0.1 (<0.1, 0.6)                                                                      | 2.1 (0.7, 4.1)                                                                              | 1100 (165, 6556)                                                 |
|          |       | 10                          | 8.9                   | 13              | 0.90        | 0.901                | 0.829 (0.784, 0.870) | 7.4 (6.1, 9.2)                                                                       | 9 (7.2, 11.0)                                                                               | 13 (11, 16)                                                      |
|          |       | 10                          | 8.9                   | 16              | 0.95        | 0.949                | 0.810 (0.753, 0.866) | 7.2 (5.9, 9.0)                                                                       | 4.6 (2.9, 6.5)                                                                              | 14 (11, 17)                                                      |
|          | Women | 10                          | 8.9                   | 19              | 0.98        | 0.981                | 0.792 (0.719, 0.861) | 7.1 (5.7, 8.8)                                                                       | 1.7 (0.5, 3.3)                                                                              | 14 (11, 17)                                                      |
|          |       | 10                          | 1.8                   | 7               | 0.90        | 0.889                | 0.848 (0.812, 0.881) | 1.5 (0.9, 2.4)                                                                       | 10.9 (8.7, 13.5)                                                                            | 67 (42, 106)                                                     |
|          |       | 10                          | 1.8                   | 9               | 0.95        | 0.944                | 0.810 (0.764, 0.853) | 1.4 (0.9, 2.3)                                                                       | 5.5 (3.6, 7.8)                                                                              | 70 (44, 113)                                                     |
| Panama   | Men   | 10                          | 1.8                   | 11              | 0.98        | 0.979                | 0.773 (0.711, 0.831) | 1.4 (0.9, 2.2)                                                                       | 2.1 (0.7, 4.0)                                                                              | 74 (46, 117)                                                     |
|          |       | 10                          | 9.9                   | 13              | 0.90        | 0.901                | 0.829 (0.784, 0.870) | 8.2 (6.8, 10.1)                                                                      | 8.9 (7.1, 10.8)                                                                             | 12 (10, 15)                                                      |
|          |       | 10                          | 9.9                   | 16              | 0.95        | 0.949                | 0.810 (0.753, 0.866) | 8.1 (6.6, 9.9)                                                                       | 4.6 (2.9, 6.4)                                                                              | 12 (10, 15)                                                      |
|          |       | 10                          | 9.9                   | 19              | 0.98        | 0.981                | 0.792 (0.719, 0.861) | 7.9 (6.4, 9.7)                                                                       | 1.7 (0.5, 3.3)                                                                              | 13 (10, 16)                                                      |

| Country          | Sex      | Standard drink size (grams) | Prevalence (%) of AUD | AUDIT cut-point | Specificity | Specificity (actual) | Sensitivity (95% UI) | People who have an AUD and a positive AUDIT score [per 100 people screened] (95% UI) | People who do not have an AUD and a positive AUDIT score [per 100 people screened] (95% UI) | Number of people needed to screen to treat one AUD case (95% UI) |              |
|------------------|----------|-----------------------------|-----------------------|-----------------|-------------|----------------------|----------------------|--------------------------------------------------------------------------------------|---------------------------------------------------------------------------------------------|------------------------------------------------------------------|--------------|
| Papua New Guinea | Women    | 10                          | 3.7                   | 7               | 0.90        | 0.889                | 0.848 (0.812, 0.881) | 3.2 (2.3, 4.4)                                                                       | 10.7 (8.5, 13.3)                                                                            | 32 (23, 44)                                                      |              |
|                  |          | 10                          | 3.7                   | 9               | 0.95        | 0.944                | 0.810 (0.764, 0.853) | 3 (2.2, 4.2)                                                                         | 5.4 (3.5, 7.7)                                                                              | 33 (24, 46)                                                      |              |
|                  |          | 10                          | 3.7                   | 11              | 0.98        | 0.979                | 0.773 (0.711, 0.831) | 2.9 (2.1, 4.0)                                                                       | 2.1 (0.7, 3.9)                                                                              | 35 (25, 48)                                                      |              |
|                  | Men      | 10                          | 8.8                   | 13              | 0.90        | 0.901                | 0.829 (0.784, 0.870) | 7.3 (5.8, 9.0)                                                                       | 9.1 (7.2, 11.0)                                                                             | 14 (11, 17)                                                      |              |
|                  |          | 10                          | 8.8                   | 16              | 0.95        | 0.949                | 0.810 (0.753, 0.866) | 7.1 (5.7, 8.8)                                                                       | 4.6 (2.9, 6.5)                                                                              | 14 (11, 18)                                                      |              |
|                  |          | 10                          | 8.8                   | 19              | 0.98        | 0.981                | 0.792 (0.719, 0.861) | 7 (5.5, 8.7)                                                                         | 1.8 (0.5, 3.4)                                                                              | 14 (12, 18)                                                      |              |
|                  | Paraguay | Women                       | 10                    | 1.8             | 7           | 0.90                 | 0.889                | 0.848 (0.812, 0.881)                                                                 | 1.5 (0.9, 2.3)                                                                              | 10.9 (8.7, 13.4)                                                 | 67 (43, 106) |
|                  |          |                             | 10                    | 1.8             | 9           | 0.95                 | 0.944                | 0.810 (0.764, 0.853)                                                                 | 1.4 (0.9, 2.2)                                                                              | 5.5 (3.6, 7.8)                                                   | 70 (45, 111) |
|                  |          |                             | 10                    | 1.8             | 11          | 0.98                 | 0.979                | 0.773 (0.711, 0.831)                                                                 | 1.4 (0.9, 2.2)                                                                              | 2.1 (0.7, 4.0)                                                   | 74 (46, 116) |
| Men              |          | 10                          | 10.2                  | 13              | 0.90        | 0.901                | 0.829 (0.784, 0.870) | 8.4 (6.9, 10.1)                                                                      | 8.9 (7.1, 10.9)                                                                             | 12 (10, 14)                                                      |              |
|                  |          | 10                          | 10.2                  | 16              | 0.95        | 0.949                | 0.810 (0.753, 0.866) | 8.2 (6.7, 9.9)                                                                       | 4.6 (2.8, 6.4)                                                                              | 12 (10, 15)                                                      |              |
|                  |          | 10                          | 10.2                  | 19              | 0.98        | 0.981                | 0.792 (0.719, 0.861) | 8.1 (6.5, 9.8)                                                                       | 1.7 (0.5, 3.3)                                                                              | 12 (10, 15)                                                      |              |
| Peru             | Women    | 10                          | 3.7                   | 7               | 0.90        | 0.889                | 0.848 (0.812, 0.881) | 3.2 (2.3, 4.3)                                                                       | 10.7 (8.5, 13.2)                                                                            | 31 (23, 44)                                                      |              |
|                  |          | 10                          | 3.7                   | 9               | 0.95        | 0.944                | 0.810 (0.764, 0.853) | 3 (2.2, 4.1)                                                                         | 5.4 (3.5, 7.6)                                                                              | 33 (24, 46)                                                      |              |
|                  |          | 10                          | 3.7                   | 11              | 0.98        | 0.979                | 0.773 (0.711, 0.831) | 2.9 (2.1, 4.0)                                                                       | 2.1 (0.7, 3.9)                                                                              | 35 (25, 48)                                                      |              |
|                  | Men      | 10                          | 14.0                  | 13              | 0.90        | 0.901                | 0.829 (0.784, 0.870) | 11.6 (9.8, 13.7)                                                                     | 8.5 (6.8, 10.4)                                                                             | 9 (7, 10)                                                        |              |
|                  |          | 10                          | 14.0                  | 16              | 0.95        | 0.949                | 0.810 (0.753, 0.866) | 11.4 (9.6, 13.4)                                                                     | 4.4 (2.7, 6.2)                                                                              | 9 (7, 10)                                                        |              |
|                  |          | 10                          | 14.0                  | 19              | 0.98        | 0.981                | 0.792 (0.719, 0.861) | 11.1 (9.3, 13.3)                                                                     | 1.7 (0.5, 3.2)                                                                              | 9 (8, 11)                                                        |              |
|                  | Women    | 10                          | 3.8                   | 7               | 0.90        | 0.889                | 0.848 (0.812, 0.881) | 3.3 (2.4, 4.4)                                                                       | 10.7 (8.5, 13.2)                                                                            | 31 (23, 42)                                                      |              |
|                  |          | 10                          | 3.8                   | 9               | 0.95        | 0.944                | 0.810 (0.764, 0.853) | 3.1 (2.2, 4.2)                                                                       | 5.4 (3.5, 7.6)                                                                              | 32 (24, 45)                                                      |              |
|                  |          | 10                          | 3.8                   | 11              | 0.98        | 0.979                | 0.773 (0.711, 0.831) | 3 (2.1, 4.0)                                                                         | 2 (0.7, 3.9)                                                                                | 34 (25, 47)                                                      |              |
| Philippines      | Men      | 14                          | 8.8                   | 11              | 0.90        | 0.899                | 0.773 (0.717, 0.823) | 6.8 (5.6, 8.4)                                                                       | 9.2 (7.0, 11.6)                                                                             | 15 (12, 18)                                                      |              |

| Country  | Sex   | Standard drink size (grams) | Prevalence (%) of AUD | AUDIT cut-point | Specificity | Specificity (actual) | Sensitivity (95% UI) | People who have an AUD and a positive AUDIT score [per 100 people screened] (95% UI) | People who do not have an AUD and a positive AUDIT score [per 100 people screened] (95% UI) | Number of people needed to screen to treat one AUD case (95% UI) |             |
|----------|-------|-----------------------------|-----------------------|-----------------|-------------|----------------------|----------------------|--------------------------------------------------------------------------------------|---------------------------------------------------------------------------------------------|------------------------------------------------------------------|-------------|
| Poland   | Women | 14                          | 8.8                   | 14              | 0.95        | 0.951                | 0.750 (0.683, 0.814) | 6.6 (5.3, 8.2)                                                                       | 4.5 (2.6, 6.6)                                                                              | 15 (12, 19)                                                      |             |
|          |       | 14                          | 8.8                   | 17              | 0.98        | 0.983                | 0.729 (0.646, 0.806) | 6.4 (5.1, 8.1)                                                                       | 1.5 (0.3, 3.3)                                                                              | 16 (12, 19)                                                      |             |
|          |       | 14                          | 1.8                   | 7               | 0.90        | 0.895                | 0.748 (0.691, 0.797) | 1.3 (0.8, 2.1)                                                                       | 10.4 (7.9, 13.0)                                                                            | 76 (49, 123)                                                     |             |
|          |       | 14                          | 1.8                   | 9               | 0.95        | 0.948                | 0.703 (0.640, 0.758) | 1.2 (0.8, 1.9)                                                                       | 5.1 (3.1, 7.4)                                                                              | 81 (52, 131)                                                     |             |
|          |       | 14                          | 1.8                   | 11              | 0.98        | 0.981                | 0.661 (0.584, 0.730) | 1.2 (0.7, 1.8)                                                                       | 1.8 (0.6, 3.6)                                                                              | 86 (55, 140)                                                     |             |
|          | Men   | 10                          | 22.7                  | 13              | 0.90        | 0.901                | 0.829 (0.784, 0.870) | 18.8 (16.4, 21.2)                                                                    | 7.7 (6.1, 9.4)                                                                              | 5 (5, 6)                                                         |             |
|          |       | 10                          | 22.7                  | 16              | 0.95        | 0.949                | 0.810 (0.753, 0.866) | 18.4 (15.8, 20.8)                                                                    | 3.9 (2.5, 5.5)                                                                              | 5 (5, 6)                                                         |             |
|          |       | 10                          | 22.7                  | 19              | 0.98        | 0.981                | 0.792 (0.719, 0.861) | 18 (15.2, 20.5)                                                                      | 1.5 (0.4, 2.9)                                                                              | 6 (5, 7)                                                         |             |
|          |       | Women                       | 10                    | 3.7             | 7           | 0.90                 | 0.889                | 0.848 (0.812, 0.881)                                                                 | 3.1 (2.3, 4.3)                                                                              | 10.7 (8.5, 13.2)                                                 | 32 (23, 44) |
|          |       |                             | 10                    | 3.7             | 9           | 0.95                 | 0.944                | 0.810 (0.764, 0.853)                                                                 | 3 (2.2, 4.1)                                                                                | 5.4 (3.5, 7.6)                                                   | 33 (24, 46) |
| Portugal | Men   | 10                          | 3.7                   | 11              | 0.98        | 0.979                | 0.773 (0.711, 0.831) | 2.9 (2.1, 4.0)                                                                       | 2.1 (0.7, 3.9)                                                                              | 35 (25, 48)                                                      |             |
|          |       | 11                          | 11.0                  | 12              | 0.90        | 0.89                 | 0.819 (0.781, 0.854) | 9 (7.5, 10.7)                                                                        | 9.8 (8.1, 11.5)                                                                             | 11 (9, 13)                                                       |             |
|          |       | 11                          | 11.0                  | 16              | 0.95        | 0.956                | 0.792 (0.736, 0.847) | 8.7 (7.2, 10.3)                                                                      | 3.9 (2.4, 5.6)                                                                              | 12 (10, 14)                                                      |             |
|          |       | 11                          | 11.0                  | 18              | 0.98        | 0.977                | 0.780 (0.715, 0.844) | 8.6 (7.0, 10.2)                                                                      | 2 (0.8, 3.6)                                                                                | 12 (10, 14)                                                      |             |
|          |       | Women                       | 11                    | 3.2             | 7           | 0.90                 | 0.89                 | 0.825 (0.795, 0.852)                                                                 | 2.6 (1.8, 3.7)                                                                              | 10.6 (8.9, 12.6)                                                 | 38 (27, 55) |
|          | 11    |                             | 3.2                   | 9               | 0.95        | 0.945                | 0.784 (0.742, 0.824) | 2.5 (1.7, 3.5)                                                                       | 5.3 (3.7, 7.2)                                                                              | 40 (28, 58)                                                      |             |
|          | Men   | 11                          | 3.2                   | 11              | 0.98        | 0.979                | 0.746 (0.687, 0.803) | 2.4 (1.6, 3.4)                                                                       | 2 (0.8, 3.6)                                                                                | 42 (30, 61)                                                      |             |
|          |       | 10                          | 0.4                   | 13              | 0.90        | 0.901                | 0.829 (0.784, 0.870) | 0.3 (0.1, 0.8)                                                                       | 9.9 (7.9, 12.0)                                                                             | 312 (120, 883)                                                   |             |
|          |       | 10                          | 0.4                   | 16              | 0.95        | 0.949                | 0.810 (0.753, 0.866) | 0.3 (0.1, 0.8)                                                                       | 5.1 (3.1, 7.1)                                                                              | 320 (122, 921)                                                   |             |
|          |       | 10                          | 0.4                   | 19              | 0.98        | 0.981                | 0.792 (0.719, 0.861) | 0.3 (0.1, 0.8)                                                                       | 1.9 (0.5, 3.7)                                                                              | 327 (123, 936)                                                   |             |
| Women    |       | 10                          | 0.1                   | 7               | 0.90        | 0.889                | 0.848 (0.812, 0.881) | 0.1 (<0.1, 0.7)                                                                      | 11.1 (8.8, 13.7)                                                                            | 1712 (148, 16948)                                                |             |
| Qatar    | 10    | 0.1                         | 9                     | 0.95            | 0.944       | 0.810 (0.764, 0.853) | 0.1 (<0.1, 0.6)      | 5.6 (3.6, 7.9)                                                                       | 1794 (158, 17914)                                                                           |                                                                  |             |

| Country               | Sex   | Standard drink size (grams) | Prevalence (%) of AUD | AUDIT cut-point | Specificity | Specificity (actual) | Sensitivity (95% UI) | People who have an AUD and a positive AUDIT score [per 100 people screened] (95% UI) | People who do not have an AUD and a positive AUDIT score [per 100 people screened] (95% UI) | Number of people needed to screen to treat one AUD case (95% UI) |
|-----------------------|-------|-----------------------------|-----------------------|-----------------|-------------|----------------------|----------------------|--------------------------------------------------------------------------------------|---------------------------------------------------------------------------------------------|------------------------------------------------------------------|
| Korea (Republic of)   | Men   | 10                          | 0.1                   | 11              | 0.98        | 0.979                | 0.773 (0.711, 0.831) | 0.1 (<0.1, 0.6)                                                                      | 2.1 (0.7, 4.1)                                                                              | 1879 (167, 18953)                                                |
|                       |       | 10                          | 21.2                  | 13              | 0.90        | 0.901                | 0.829 (0.784, 0.870) | 17.6 (15.6, 19.8)                                                                    | 7.8 (6.2, 9.5)                                                                              | 6 (5, 6)                                                         |
|                       |       | 10                          | 21.2                  | 16              | 0.95        | 0.949                | 0.810 (0.753, 0.866) | 17.2 (15.1, 19.6)                                                                    | 4 (2.5, 5.6)                                                                                | 6 (5, 7)                                                         |
|                       | Women | 10                          | 21.2                  | 19              | 0.98        | 0.981                | 0.792 (0.719, 0.861) | 16.8 (14.5, 19.3)                                                                    | 1.5 (0.4, 2.9)                                                                              | 6 (5, 7)                                                         |
|                       |       | 10                          | 6.8                   | 7               | 0.90        | 0.889                | 0.848 (0.812, 0.881) | 5.8 (4.6, 7.2)                                                                       | 10.4 (8.2, 12.9)                                                                            | 17 (14, 22)                                                      |
|                       |       | 10                          | 6.8                   | 9               | 0.95        | 0.944                | 0.810 (0.764, 0.853) | 5.5 (4.3, 6.9)                                                                       | 5.2 (3.4, 7.4)                                                                              | 18 (14, 23)                                                      |
| Moldova (Republic of) | Men   | 10                          | 6.8                   | 11              | 0.98        | 0.979                | 0.773 (0.711, 0.831) | 5.3 (4.1, 6.7)                                                                       | 2 (0.7, 3.8)                                                                                | 19 (15, 24)                                                      |
|                       |       | 10                          | 10.3                  | 13              | 0.90        | 0.901                | 0.829 (0.784, 0.870) | 8.5 (7.1, 10.3)                                                                      | 8.9 (7.0, 10.8)                                                                             | 12 (10, 14)                                                      |
|                       |       | 10                          | 10.3                  | 16              | 0.95        | 0.949                | 0.810 (0.753, 0.866) | 8.3 (6.9, 10.2)                                                                      | 4.6 (2.8, 6.4)                                                                              | 12 (10, 14)                                                      |
|                       | Women | 10                          | 10.3                  | 19              | 0.98        | 0.981                | 0.792 (0.719, 0.861) | 8.1 (6.7, 10.0)                                                                      | 1.7 (0.5, 3.3)                                                                              | 12 (10, 15)                                                      |
|                       |       | 10                          | 2.2                   | 7               | 0.90        | 0.889                | 0.848 (0.812, 0.881) | 1.8 (1.2, 2.8)                                                                       | 10.9 (8.6, 13.4)                                                                            | 54 (35, 82)                                                      |
|                       |       | 10                          | 2.2                   | 9               | 0.95        | 0.944                | 0.810 (0.764, 0.853) | 1.8 (1.2, 2.7)                                                                       | 5.5 (3.5, 7.8)                                                                              | 57 (37, 86)                                                      |
| Romania               | Men   | 10                          | 2.2                   | 11              | 0.98        | 0.979                | 0.773 (0.711, 0.831) | 1.7 (1.1, 2.6)                                                                       | 2.1 (0.7, 4.0)                                                                              | 60 (39, 91)                                                      |
|                       |       | 12                          | 4.5                   | 12              | 0.90        | 0.9                  | 0.802 (0.763, 0.838) | 3.6 (2.7, 4.7)                                                                       | 9.5 (7.8, 11.4)                                                                             | 28 (21, 37)                                                      |
|                       |       | 12                          | 4.5                   | 15              | 0.95        | 0.95                 | 0.781 (0.728, 0.833) | 3.5 (2.6, 4.6)                                                                       | 4.7 (3.2, 6.6)                                                                              | 29 (22, 38)                                                      |
|                       | Women | 12                          | 4.5                   | 18              | 0.98        | 0.982                | 0.761 (0.691, 0.830) | 3.4 (2.6, 4.5)                                                                       | 1.7 (0.5, 3.4)                                                                              | 29 (22, 39)                                                      |
|                       |       | 12                          | 1.4                   | 7               | 0.90        | 0.892                | 0.800 (0.769, 0.829) | 1.1 (0.6, 1.8)                                                                       | 10.7 (9.0, 12.5)                                                                            | 92 (55, 160)                                                     |
|                       |       | 12                          | 1.4                   | 9               | 0.95        | 0.946                | 0.758 (0.717, 0.797) | 1 (0.6, 1.7)                                                                         | 5.3 (3.8, 7.1)                                                                              | 98 (58, 172)                                                     |
| Russian Federation    | Men   | 12                          | 1.4                   | 11              | 0.98        | 0.98                 | 0.718 (0.660, 0.773) | 1 (0.5, 1.6)                                                                         | 2 (0.8, 3.5)                                                                                | 103 (61, 182)                                                    |
|                       |       | 10                          | 36.9                  | 13              | 0.90        | 0.901                | 0.829 (0.784, 0.870) | 30.6 (27.7, 33.7)                                                                    | 6.3 (5.0, 7.7)                                                                              | 3 (3, 4)                                                         |
|                       |       | 10                          | 36.9                  | 16              | 0.95        | 0.949                | 0.810 (0.753, 0.866) | 29.9 (26.7, 33.2)                                                                    | 3.2 (2.0, 4.5)                                                                              | 3 (3, 4)                                                         |

| Country               | Sex   | Standard drink size (grams) | Prevalence (%) of AUD | AUDIT cut-point | Specificity | Specificity (actual) | Sensitivity (95% UI) | People who have an AUD and a positive AUDIT score [per 100 people screened] (95% UI) | People who do not have an AUD and a positive AUDIT score [per 100 people screened] (95% UI) | Number of people needed to screen to treat one AUD case (95% UI) |
|-----------------------|-------|-----------------------------|-----------------------|-----------------|-------------|----------------------|----------------------|--------------------------------------------------------------------------------------|---------------------------------------------------------------------------------------------|------------------------------------------------------------------|
| Rwanda                | Women | 10                          | 36.9                  | 19              | 0.98        | 0.981                | 0.792 (0.719, 0.861) | 29.2 (25.7, 32.9)                                                                    | 1.2 (0.3, 2.4)                                                                              | 3 (3, 4)                                                         |
|                       |       | 10                          | 7.4                   | 7               | 0.90        | 0.889                | 0.848 (0.812, 0.881) | 6.3 (5.0, 7.7)                                                                       | 10.3 (8.2, 12.7)                                                                            | 16 (13, 20)                                                      |
|                       |       | 10                          | 7.4                   | 9               | 0.95        | 0.944                | 0.810 (0.764, 0.853) | 6 (4.7, 7.4)                                                                         | 5.2 (3.4, 7.3)                                                                              | 17 (14, 21)                                                      |
|                       |       | 10                          | 7.4                   | 11              | 0.98        | 0.979                | 0.773 (0.711, 0.831) | 5.7 (4.5, 7.1)                                                                       | 2 (0.7, 3.8)                                                                                | 17 (14, 22)                                                      |
|                       |       | 10                          | 12.2                  | 13              | 0.90        | 0.901                | 0.829 (0.784, 0.870) | 10.2 (8.5, 12.2)                                                                     | 8.7 (6.9, 10.6)                                                                             | 10 (8, 12)                                                       |
|                       | Men   | 10                          | 12.2                  | 16              | 0.95        | 0.949                | 0.810 (0.753, 0.866) | 9.9 (8.3, 11.9)                                                                      | 4.5 (2.8, 6.2)                                                                              | 10 (8, 12)                                                       |
|                       |       | 10                          | 12.2                  | 19              | 0.98        | 0.981                | 0.792 (0.719, 0.861) | 9.7 (8.1, 11.8)                                                                      | 1.7 (0.5, 3.3)                                                                              | 10 (9, 12)                                                       |
|                       |       | 10                          | 2.5                   | 7               | 0.90        | 0.889                | 0.848 (0.812, 0.881) | 2.1 (1.4, 3.0)                                                                       | 10.8 (8.6, 13.4)                                                                            | 48 (33, 71)                                                      |
|                       |       | 10                          | 2.5                   | 9               | 0.95        | 0.944                | 0.810 (0.764, 0.853) | 2 (1.3, 2.9)                                                                         | 5.5 (3.5, 7.7)                                                                              | 50 (34, 75)                                                      |
|                       |       | 10                          | 2.5                   | 11              | 0.98        | 0.979                | 0.773 (0.711, 0.831) | 1.9 (1.3, 2.8)                                                                       | 2.1 (0.7, 4.0)                                                                              | 53 (35, 78)                                                      |
| Saint Kitts and Nevis | Men   | 10                          | 9.7                   | 13              | 0.90        | 0.901                | 0.829 (0.784, 0.870) | 8 (6.5, 9.6)                                                                         | 9 (7.1, 10.9)                                                                               | 12 (10, 15)                                                      |
|                       |       | 10                          | 9.7                   | 16              | 0.95        | 0.949                | 0.810 (0.753, 0.866) | 7.9 (6.3, 9.5)                                                                       | 4.6 (2.9, 6.4)                                                                              | 13 (11, 16)                                                      |
|                       |       | 10                          | 9.7                   | 19              | 0.98        | 0.981                | 0.792 (0.719, 0.861) | 7.7 (6.1, 9.4)                                                                       | 1.7 (0.5, 3.3)                                                                              | 13 (11, 16)                                                      |
|                       |       | 10                          | 3.6                   | 7               | 0.90        | 0.889                | 0.848 (0.812, 0.881) | 3.1 (2.3, 4.2)                                                                       | 10.7 (8.4, 13.3)                                                                            | 32 (24, 44)                                                      |
|                       |       | 10                          | 3.6                   | 9               | 0.95        | 0.944                | 0.810 (0.764, 0.853) | 3 (2.1, 4.0)                                                                         | 5.4 (3.5, 7.7)                                                                              | 34 (25, 47)                                                      |
|                       | Women | 10                          | 3.6                   | 11              | 0.98        | 0.979                | 0.773 (0.711, 0.831) | 2.8 (2.0, 3.8)                                                                       | 2.1 (0.7, 3.9)                                                                              | 35 (26, 50)                                                      |
|                       |       | 10                          | 9.5                   | 13              | 0.90        | 0.901                | 0.829 (0.784, 0.870) | 7.9 (6.5, 9.6)                                                                       | 9 (7.1, 10.9)                                                                               | 13 (10, 15)                                                      |
|                       |       | 10                          | 9.5                   | 16              | 0.95        | 0.949                | 0.810 (0.753, 0.866) | 7.7 (6.4, 9.4)                                                                       | 4.6 (2.9, 6.4)                                                                              | 13 (11, 16)                                                      |
|                       |       | 10                          | 9.5                   | 19              | 0.98        | 0.981                | 0.792 (0.719, 0.861) | 7.5 (6.2, 9.2)                                                                       | 1.7 (0.5, 3.3)                                                                              | 13 (11, 16)                                                      |
|                       |       | 10                          | 3.6                   | 7               | 0.90        | 0.889                | 0.848 (0.812, 0.881) | 3.1 (2.3, 4.3)                                                                       | 10.7 (8.5, 13.2)                                                                            | 33 (23, 44)                                                      |
| Saint Lucia           | Men   | 10                          | 3.6                   | 9               | 0.95        | 0.944                | 0.810 (0.764, 0.853) | 2.9 (2.1, 4.1)                                                                       | 5.4 (3.5, 7.6)                                                                              | 34 (24, 47)                                                      |
|                       |       | 10                          | 3.6                   | 11              | 0.98        | 0.979                | 0.773 (0.711, 0.831) | 2.8 (2.0, 3.9)                                                                       | 2.1 (0.7, 3.9)                                                                              | 36 (26, 49)                                                      |

| Country                          | Sex   | Standard drink size (grams) | Prevalence (%) of AUD | AUDIT cut-point | Specificity | Specificity (actual) | Sensitivity (95% UI) |                | People who have an AUD and a positive AUDIT score [per 100 people screened] (95% UI) | People who do not have an AUD and a positive AUDIT score [per 100 people screened] (95% UI) | Number of people needed to screen to treat one AUD case (95% UI) |             |     |            |
|----------------------------------|-------|-----------------------------|-----------------------|-----------------|-------------|----------------------|----------------------|----------------|--------------------------------------------------------------------------------------|---------------------------------------------------------------------------------------------|------------------------------------------------------------------|-------------|-----|------------|
| Saint Vincent and the Grenadines | Men   | 10                          | 10.0                  | 13              | 0.90        | 0.901                | 0.829                | (0.784, 0.870) | 8.3                                                                                  | (6.8, 10.0)                                                                                 | 8.9                                                              | (7.1, 11.0) | 12  | (10, 15)   |
|                                  |       | 10                          | 10.0                  | 16              | 0.95        | 0.949                | 0.810                | (0.753, 0.866) | 8.1                                                                                  | (6.6, 9.8)                                                                                  | 4.6                                                              | (2.9, 6.4)  | 12  | (10, 15)   |
|                                  |       | 10                          | 10.0                  | 19              | 0.98        | 0.981                | 0.792                | (0.719, 0.861) | 7.9                                                                                  | (6.4, 9.6)                                                                                  | 1.7                                                              | (0.5, 3.3)  | 13  | (10, 16)   |
|                                  | Women | 10                          | 3.7                   | 7               | 0.90        | 0.889                | 0.848                | (0.812, 0.881) | 3.1                                                                                  | (2.2, 4.3)                                                                                  | 10.7                                                             | (8.5, 13.3) | 32  | (23, 45)   |
|                                  |       | 10                          | 3.7                   | 9               | 0.95        | 0.944                | 0.810                | (0.764, 0.853) | 3                                                                                    | (2.1, 4.1)                                                                                  | 5.4                                                              | (3.5, 7.6)  | 33  | (24, 47)   |
|                                  |       | 10                          | 3.7                   | 11              | 0.98        | 0.979                | 0.773                | (0.711, 0.831) | 2.9                                                                                  | (2.0, 4.0)                                                                                  | 2.1                                                              | (0.7, 3.9)  | 35  | (25, 49)   |
| Samoa                            | Men   | 10                          | 8.8                   | 13              | 0.90        | 0.901                | 0.829                | (0.784, 0.870) | 7.3                                                                                  | (6.0, 8.8)                                                                                  | 9.1                                                              | (7.2, 11.0) | 14  | (11, 17)   |
|                                  |       | 10                          | 8.8                   | 16              | 0.95        | 0.949                | 0.810                | (0.753, 0.866) | 7.2                                                                                  | (5.8, 8.7)                                                                                  | 4.6                                                              | (2.9, 6.5)  | 14  | (12, 17)   |
|                                  |       | 10                          | 8.8                   | 19              | 0.98        | 0.981                | 0.792                | (0.719, 0.861) | 7                                                                                    | (5.7, 8.6)                                                                                  | 1.8                                                              | (0.5, 3.4)  | 14  | (12, 18)   |
|                                  | Women | 10                          | 1.8                   | 7               | 0.90        | 0.889                | 0.848                | (0.812, 0.881) | 1.5                                                                                  | (0.9, 2.4)                                                                                  | 10.9                                                             | (8.6, 13.6) | 67  | (42, 108)  |
|                                  |       | 10                          | 1.8                   | 9               | 0.95        | 0.944                | 0.810                | (0.764, 0.853) | 1.4                                                                                  | (0.9, 2.3)                                                                                  | 5.5                                                              | (3.6, 7.8)  | 70  | (44, 113)  |
|                                  |       | 10                          | 1.8                   | 11              | 0.98        | 0.979                | 0.773                | (0.711, 0.831) | 1.4                                                                                  | (0.8, 2.2)                                                                                  | 2.1                                                              | (0.7, 4.0)  | 73  | (46, 119)  |
| Sao Tome and Principe            | Men   | 10                          | 10.9                  | 13              | 0.90        | 0.901                | 0.829                | (0.784, 0.870) | 9                                                                                    | (7.4, 10.8)                                                                                 | 8.8                                                              | (7.1, 10.8) | 11  | (9, 13)    |
|                                  |       | 10                          | 10.9                  | 16              | 0.95        | 0.949                | 0.810                | (0.753, 0.866) | 8.8                                                                                  | (7.2, 10.7)                                                                                 | 4.5                                                              | (2.8, 6.4)  | 11  | (9, 14)    |
|                                  |       | 10                          | 10.9                  | 19              | 0.98        | 0.981                | 0.792                | (0.719, 0.861) | 8.6                                                                                  | (7.0, 10.6)                                                                                 | 1.7                                                              | (0.5, 3.3)  | 12  | (9, 14)    |
|                                  | Women | 10                          | 1.9                   | 7               | 0.90        | 0.889                | 0.848                | (0.812, 0.881) | 1.6                                                                                  | (1.1, 2.6)                                                                                  | 10.9                                                             | (8.6, 13.5) | 61  | (39, 95)   |
|                                  |       | 10                          | 1.9                   | 9               | 0.95        | 0.944                | 0.810                | (0.764, 0.853) | 1.6                                                                                  | (1.0, 2.5)                                                                                  | 5.5                                                              | (3.6, 7.8)  | 64  | (41, 100)  |
|                                  |       | 10                          | 1.9                   | 11              | 0.98        | 0.979                | 0.773                | (0.711, 0.831) | 1.5                                                                                  | (1.0, 2.4)                                                                                  | 2.1                                                              | (0.7, 4.0)  | 67  | (42, 105)  |
| Saudi Arabia                     | Men   | 10                          | 0.5                   | 13              | 0.90        | 0.901                | 0.829                | (0.784, 0.870) | 0.4                                                                                  | (0.2, 0.9)                                                                                  | 9.9                                                              | (7.9, 12.1) | 257 | (109, 664) |
|                                  |       | 10                          | 0.5                   | 16              | 0.95        | 0.949                | 0.810                | (0.753, 0.866) | 0.4                                                                                  | (0.1, 0.9)                                                                                  | 5                                                                | (3.1, 7.1)  | 264 | (111, 684) |
|                                  |       | 10                          | 0.5                   | 19              | 0.98        | 0.981                | 0.792                | (0.719, 0.861) | 0.4                                                                                  | (0.1, 0.9)                                                                                  | 1.9                                                              | (0.5, 3.7)  | 270 | (113, 697) |

| Country      | Sex    | Standard drink size (grams) | Prevalence (%) of AUD | AUDIT cut-point | Specificity | Specificity (actual) | Sensitivity (95% UI) | People who have an AUD and a positive AUDIT score [per 100 people screened] (95% UI) | People who do not have an AUD and a positive AUDIT score [per 100 people screened] (95% UI) | Number of people needed to screen to treat one AUD case (95% UI) |                   |
|--------------|--------|-----------------------------|-----------------------|-----------------|-------------|----------------------|----------------------|--------------------------------------------------------------------------------------|---------------------------------------------------------------------------------------------|------------------------------------------------------------------|-------------------|
| Senegal      | Women  | 10                          | 0.1                   | 7               | 0.90        | 0.889                | 0.848 (0.812, 0.881) | 0.1 (<0.1, 0.6)                                                                      | 11.1 (8.8, 13.7)                                                                            | 1236 (165, 8901)                                                 |                   |
|              |        | 10                          | 0.1                   | 9               | 0.95        | 0.944                | 0.810 (0.764, 0.853) | 0.1 (<0.1, 0.6)                                                                      | 5.6 (3.6, 7.9)                                                                              | 1295 (174, 9070)                                                 |                   |
|              |        | 10                          | 0.1                   | 11              | 0.98        | 0.979                | 0.773 (0.711, 0.831) | 0.1 (<0.1, 0.5)                                                                      | 2.1 (0.7, 4.1)                                                                              | 1356 (182, 9566)                                                 |                   |
|              | Men    | 10                          | 1.4                   | 13              | 0.90        | 0.901                | 0.829 (0.784, 0.870) | 1.2 (0.7, 2.0)                                                                       | 9.8 (7.8, 11.9)                                                                             | 84 (50, 139)                                                     |                   |
|              |        | 10                          | 1.4                   | 16              | 0.95        | 0.949                | 0.810 (0.753, 0.866) | 1.2 (0.7, 2.0)                                                                       | 5 (3.1, 7.0)                                                                                | 86 (51, 143)                                                     |                   |
|              |        | 10                          | 1.4                   | 19              | 0.98        | 0.981                | 0.792 (0.719, 0.861) | 1.1 (0.7, 1.9)                                                                       | 1.9 (0.5, 3.6)                                                                              | 88 (52, 148)                                                     |                   |
|              | Serbia | Women                       | 10                    | 0.0             | 7           | 0.90                 | 0.889                | 0.848 (0.812, 0.881)                                                                 | <0.1 (<0.1, 0.7)                                                                            | 11.1 (8.8, 13.7)                                                 | 3210 (152, 90904) |
|              |        |                             | 10                    | 0.0             | 9           | 0.95                 | 0.944                | 0.810 (0.764, 0.853)                                                                 | <0.1 (<0.1, 0.6)                                                                            | 5.6 (3.6, 7.9)                                                   | 3363 (159, 94438) |
|              |        |                             | 10                    | 0.0             | 11          | 0.98                 | 0.979                | 0.773 (0.711, 0.831)                                                                 | <0.1 (<0.1, 0.6)                                                                            | 2.1 (0.7, 4.1)                                                   | 3523 (169, 98080) |
| Men          |        | 10                          | 9.9                   | 13              | 0.90        | 0.901                | 0.829 (0.784, 0.870) | 8.2 (6.7, 10.0)                                                                      | 8.9 (7.1, 10.9)                                                                             | 12 (10, 15)                                                      |                   |
|              |        | 10                          | 9.9                   | 16              | 0.95        | 0.949                | 0.810 (0.753, 0.866) | 8.1 (6.5, 9.8)                                                                       | 4.6 (2.9, 6.4)                                                                              | 12 (10, 15)                                                      |                   |
|              |        | 10                          | 9.9                   | 19              | 0.98        | 0.981                | 0.792 (0.719, 0.861) | 7.9 (6.3, 9.6)                                                                       | 1.7 (0.5, 3.3)                                                                              | 13 (10, 16)                                                      |                   |
| Women        |        | 10                          | 2.1                   | 7               | 0.90        | 0.889                | 0.848 (0.812, 0.881) | 1.8 (1.2, 2.8)                                                                       | 10.9 (8.6, 13.4)                                                                            | 55 (36, 83)                                                      |                   |
|              |        | 10                          | 2.1                   | 9               | 0.95        | 0.944                | 0.810 (0.764, 0.853) | 1.7 (1.1, 2.6)                                                                       | 5.5 (3.6, 7.7)                                                                              | 58 (38, 87)                                                      |                   |
|              |        | 10                          | 2.1                   | 11              | 0.98        | 0.979                | 0.773 (0.711, 0.831) | 1.7 (1.1, 2.5)                                                                       | 2.1 (0.7, 4.0)                                                                              | 60 (40, 92)                                                      |                   |
| Seychelles   | Men    | 10                          | 12.2                  | 13              | 0.90        | 0.901                | 0.829 (0.784, 0.870) | 10.1 (8.4, 12.0)                                                                     | 8.7 (6.9, 10.6)                                                                             | 10 (8, 12)                                                       |                   |
|              |        | 10                          | 12.2                  | 16              | 0.95        | 0.949                | 0.810 (0.753, 0.866) | 9.9 (8.2, 11.7)                                                                      | 4.5 (2.8, 6.2)                                                                              | 10 (9, 12)                                                       |                   |
|              |        | 10                          | 12.2                  | 19              | 0.98        | 0.981                | 0.792 (0.719, 0.861) | 9.6 (8.0, 11.5)                                                                      | 1.7 (0.5, 3.2)                                                                              | 10 (9, 13)                                                       |                   |
|              | Women  | 10                          | 2.3                   | 7               | 0.90        | 0.889                | 0.848 (0.812, 0.881) | 2 (1.3, 2.9)                                                                         | 10.9 (8.6, 13.4)                                                                            | 51 (35, 76)                                                      |                   |
|              |        | 10                          | 2.3                   | 9               | 0.95        | 0.944                | 0.810 (0.764, 0.853) | 1.9 (1.2, 2.8)                                                                       | 5.5 (3.5, 7.7)                                                                              | 53 (36, 80)                                                      |                   |
|              |        | 10                          | 2.3                   | 11              | 0.98        | 0.979                | 0.773 (0.711, 0.831) | 1.8 (1.2, 2.6)                                                                       | 2.1 (0.7, 4.0)                                                                              | 56 (38, 84)                                                      |                   |
| Sierra Leone | Men    | 10                          | 6.3                   | 13              | 0.90        | 0.901                | 0.829 (0.784, 0.870) | 5.2 (4.0, 6.6)                                                                       | 9.3 (7.4, 11.3)                                                                             | 19 (15, 25)                                                      |                   |

| Country   | Sex   | Standard drink size (grams) | Prevalence (%) of AUD | AUDIT cut-point | Specificity | Specificity (actual) | Sensitivity (95% UI) | People who have an AUD and a positive AUDIT score [per 100 people screened] (95% UI) | People who do not have an AUD and a positive AUDIT score [per 100 people screened] (95% UI) | Number of people needed to screen to treat one AUD case (95% UI) |                |
|-----------|-------|-----------------------------|-----------------------|-----------------|-------------|----------------------|----------------------|--------------------------------------------------------------------------------------|---------------------------------------------------------------------------------------------|------------------------------------------------------------------|----------------|
| Singapore | Women | 10                          | 6.3                   | 16              | 0.95        | 0.949                | 0.810 (0.753, 0.866) | 5.1 (3.9, 6.5)                                                                       | 4.8 (3.0, 6.7)                                                                              | 20 (16, 25)                                                      |                |
|           |       | 10                          | 6.3                   | 19              | 0.98        | 0.981                | 0.792 (0.719, 0.861) | 5 (3.8, 6.3)                                                                         | 1.8 (0.5, 3.5)                                                                              | 20 (16, 26)                                                      |                |
|           |       | 10                          | 0.7                   | 7               | 0.90        | 0.889                | 0.848 (0.812, 0.881) | 0.6 (0.3, 1.2)                                                                       | 11 (8.8, 13.6)                                                                              | 174 (87, 356)                                                    |                |
|           |       | 10                          | 0.7                   | 9               | 0.95        | 0.944                | 0.810 (0.764, 0.853) | 0.5 (0.3, 1.1)                                                                       | 5.6 (3.6, 7.9)                                                                              | 182 (90, 375)                                                    |                |
|           |       | 10                          | 0.7                   | 11              | 0.98        | 0.979                | 0.773 (0.711, 0.831) | 0.5 (0.3, 1.1)                                                                       | 2.1 (0.7, 4.0)                                                                              | 191 (94, 391)                                                    |                |
|           | Men   | 10                          | 1.7                   | 13              | 0.90        | 0.901                | 0.829 (0.784, 0.870) | 1.4 (0.9, 2.3)                                                                       | 9.8 (7.8, 11.9)                                                                             | 71 (44, 116)                                                     |                |
|           |       | 10                          | 1.7                   | 16              | 0.95        | 0.949                | 0.810 (0.753, 0.866) | 1.4 (0.8, 2.2)                                                                       | 5 (3.1, 7.0)                                                                                | 73 (45, 120)                                                     |                |
|           |       | 10                          | 1.7                   | 19              | 0.98        | 0.981                | 0.792 (0.719, 0.861) | 1.3 (0.8, 2.2)                                                                       | 1.9 (0.5, 3.6)                                                                              | 75 (45, 125)                                                     |                |
|           |       | Women                       | 10                    | 0.5             | 7           | 0.90                 | 0.889                | 0.848 (0.812, 0.881)                                                                 | 0.4 (0.2, 1.0)                                                                              | 11.1 (8.8, 13.7)                                                 | 224 (98, 524)  |
|           |       |                             | 10                    | 0.5             | 9           | 0.95                 | 0.944                | 0.810 (0.764, 0.853)                                                                 | 0.4 (0.2, 1.0)                                                                              | 5.6 (3.6, 7.9)                                                   | 235 (102, 545) |
| Slovakia  | Men   | 10                          | 0.5                   | 11              | 0.98        | 0.979                | 0.773 (0.711, 0.831) | 0.4 (0.2, 0.9)                                                                       | 2.1 (0.7, 4.0)                                                                              | 246 (107, 569)                                                   |                |
|           |       | 10                          | 22.8                  | 13              | 0.90        | 0.901                | 0.829 (0.784, 0.870) | 18.9 (16.6, 21.5)                                                                    | 7.7 (6.0, 9.3)                                                                              | 5 (5, 6)                                                         |                |
|           |       | 10                          | 22.8                  | 16              | 0.95        | 0.949                | 0.810 (0.753, 0.866) | 18.5 (16.0, 21.2)                                                                    | 3.9 (2.4, 5.5)                                                                              | 5 (5, 6)                                                         |                |
|           |       | 10                          | 22.8                  | 19              | 0.98        | 0.981                | 0.792 (0.719, 0.861) | 18.1 (15.5, 21.0)                                                                    | 1.5 (0.4, 2.8)                                                                              | 6 (5, 6)                                                         |                |
|           |       | Women                       | 10                    | 2.5             | 7           | 0.90                 | 0.889                | 0.848 (0.812, 0.881)                                                                 | 2.1 (1.4, 3.1)                                                                              | 10.8 (8.6, 13.4)                                                 | 48 (32, 70)    |
|           | 10    |                             | 2.5                   | 9               | 0.95        | 0.944                | 0.810 (0.764, 0.853) | 2 (1.4, 3.0)                                                                         | 5.5 (3.6, 7.7)                                                                              | 50 (34, 74)                                                      |                |
|           | Men   | 10                          | 2.5                   | 11              | 0.98        | 0.979                | 0.773 (0.711, 0.831) | 1.9 (1.3, 2.8)                                                                       | 2.1 (0.7, 4.0)                                                                              | 52 (35, 76)                                                      |                |
|           |       | 10                          | 23.5                  | 13              | 0.90        | 0.901                | 0.829 (0.784, 0.870) | 19.5 (17.1, 22.0)                                                                    | 7.6 (6.0, 9.3)                                                                              | 5 (5, 6)                                                         |                |
|           |       | 10                          | 23.5                  | 16              | 0.95        | 0.949                | 0.810 (0.753, 0.866) | 19 (16.6, 21.6)                                                                      | 3.9 (2.4, 5.5)                                                                              | 5 (5, 6)                                                         |                |
|           |       | 10                          | 23.5                  | 19              | 0.98        | 0.981                | 0.792 (0.719, 0.861) | 18.6 (16.0, 21.3)                                                                    | 1.5 (0.4, 2.8)                                                                              | 5 (5, 6)                                                         |                |
| Women     |       | 10                          | 4.5                   | 7               | 0.90        | 0.889                | 0.848 (0.812, 0.881) | 3.8 (2.8, 5.0)                                                                       | 10.6 (8.5, 13.1)                                                                            | 26 (20, 35)                                                      |                |
|           | 10    | 4.5                         | 9                     | 0.95            | 0.944       | 0.810 (0.764, 0.853) | 3.6 (2.7, 4.8)       | 5.4 (3.5, 7.6)                                                                       | 27 (21, 37)                                                                                 |                                                                  |                |



| Country         | Sex   | Standard drink size (grams) | Prevalence (%) of AUD | AUDIT cut-point | Specificity | Specificity (actual) | Sensitivity (95% UI) | People who have an AUD and a positive AUDIT score [per 100 people screened] (95% UI) | People who do not have an AUD and a positive AUDIT score [per 100 people screened] (95% UI) | Number of people needed to screen to treat one AUD case (95% UI) |
|-----------------|-------|-----------------------------|-----------------------|-----------------|-------------|----------------------|----------------------|--------------------------------------------------------------------------------------|---------------------------------------------------------------------------------------------|------------------------------------------------------------------|
| Solomon Islands | Men   | 10                          | 4.5                   | 11              | 0.98        | 0.979                | 0.773 (0.711, 0.831) | 3.5 (2.5, 4.6)                                                                       | 2 (0.7, 3.9)                                                                                | 29 (22, 39)                                                      |
|                 |       | 10                          | 8.7                   | 13              | 0.90        | 0.901                | 0.829 (0.784, 0.870) | 7.3 (5.8, 8.9)                                                                       | 9.1 (7.2, 11.1)                                                                             | 14 (11, 17)                                                      |
|                 |       | 10                          | 8.7                   | 16              | 0.95        | 0.949                | 0.810 (0.753, 0.866) | 7.1 (5.6, 8.7)                                                                       | 4.6 (2.9, 6.5)                                                                              | 14 (11, 18)                                                      |
|                 | Women | 10                          | 8.7                   | 19              | 0.98        | 0.981                | 0.792 (0.719, 0.861) | 6.9 (5.5, 8.6)                                                                       | 1.8 (0.5, 3.4)                                                                              | 14 (12, 18)                                                      |
|                 |       | 10                          | 1.7                   | 7               | 0.90        | 0.889                | 0.848 (0.812, 0.881) | 1.5 (0.9, 2.3)                                                                       | 10.9 (8.7, 13.5)                                                                            | 67 (43, 111)                                                     |
|                 |       | 10                          | 1.7                   | 9               | 0.95        | 0.944                | 0.810 (0.764, 0.853) | 1.4 (0.9, 2.2)                                                                       | 5.5 (3.6, 7.8)                                                                              | 71 (45, 115)                                                     |
| Somalia         | Men   | 10                          | 1.7                   | 11              | 0.98        | 0.979                | 0.773 (0.711, 0.831) | 1.4 (0.8, 2.1)                                                                       | 2.1 (0.7, 4.0)                                                                              | 74 (47, 121)                                                     |
|                 |       | 10                          | 0.6                   | 13              | 0.90        | 0.901                | 0.829 (0.784, 0.870) | 0.5 (0.3, 1.1)                                                                       | 9.9 (7.9, 12.0)                                                                             | 188 (91, 392)                                                    |
|                 |       | 10                          | 0.6                   | 16              | 0.95        | 0.949                | 0.810 (0.753, 0.866) | 0.5 (0.2, 1.1)                                                                       | 5 (3.1, 7.1)                                                                                | 192 (93, 404)                                                    |
|                 | Women | 10                          | 0.6                   | 19              | 0.98        | 0.981                | 0.792 (0.719, 0.861) | 0.5 (0.2, 1.1)                                                                       | 1.9 (0.5, 3.7)                                                                              | 197 (95, 412)                                                    |
|                 |       | 10                          | 0.1                   | 7               | 0.90        | 0.889                | 0.848 (0.812, 0.881) | 0.1 (<0.1, 0.6)                                                                      | 11.1 (8.8, 13.7)                                                                            | 974 (179, 6150)                                                  |
|                 |       | 10                          | 0.1                   | 9               | 0.95        | 0.944                | 0.810 (0.764, 0.853) | 0.1 (<0.1, 0.5)                                                                      | 5.6 (3.6, 7.9)                                                                              | 1020 (186, 6438)                                                 |
| South Africa    | Men   | 10                          | 0.1                   | 11              | 0.98        | 0.979                | 0.773 (0.711, 0.831) | 0.1 (<0.1, 0.5)                                                                      | 2.1 (0.7, 4.1)                                                                              | 1069 (194, 6699)                                                 |
|                 |       | 11.5                        | 12.4                  | 12              | 0.90        | 0.895                | 0.811 (0.774, 0.845) | 10 (8.5, 11.8)                                                                       | 9.2 (7.6, 10.8)                                                                             | 10 (8, 12)                                                       |
|                 |       | 11.5                        | 12.4                  | 15              | 0.95        | 0.947                | 0.790 (0.739, 0.841) | 9.8 (8.2, 11.6)                                                                      | 4.7 (3.2, 6.4)                                                                              | 10 (9, 12)                                                       |
|                 | Women | 11.5                        | 12.4                  | 18              | 0.98        | 0.98                 | 0.770 (0.703, 0.839) | 9.5 (7.9, 11.4)                                                                      | 1.8 (0.6, 3.3)                                                                              | 10 (9, 13)                                                       |
|                 |       | 11.5                        | 1.8                   | 7               | 0.90        | 0.891                | 0.812 (0.784, 0.840) | 1.5 (0.9, 2.3)                                                                       | 10.7 (9.0, 12.5)                                                                            | 68 (43, 106)                                                     |
|                 |       | 11.5                        | 1.8                   | 9               | 0.95        | 0.946                | 0.771 (0.730, 0.809) | 1.4 (0.9, 2.2)                                                                       | 5.3 (3.8, 7.1)                                                                              | 71 (45, 113)                                                     |
| Spain           | Men   | 11.5                        | 1.8                   | 11              | 0.98        | 0.98                 | 0.732 (0.675, 0.788) | 1.3 (0.8, 2.1)                                                                       | 2 (0.8, 3.5)                                                                                | 75 (47, 120)                                                     |
|                 |       | 10                          | 2.7                   | 13              | 0.90        | 0.901                | 0.829 (0.784, 0.870) | 2.2 (1.5, 3.3)                                                                       | 9.7 (7.7, 11.8)                                                                             | 45 (31, 66)                                                      |
|                 |       | 10                          | 2.7                   | 16              | 0.95        | 0.949                | 0.810 (0.753, 0.866) | 2.2 (1.5, 3.2)                                                                       | 4.9 (3.1, 6.9)                                                                              | 46 (31, 68)                                                      |
|                 |       | 10                          | 2.7                   | 19              | 0.98        | 0.981                | 0.792 (0.719, 0.861) | 2.1 (1.4, 3.2)                                                                       | 1.9 (0.5, 3.6)                                                                              | 47 (32, 70)                                                      |

| Country   | Sex   | Standard drink size (grams) | Prevalence (%) of AUD | AUDIT cut-point | Specificity | Specificity (actual) | Sensitivity (95% UI) | People who have an AUD and a positive AUDIT score [per 100 people screened] (95% UI) | People who do not have an AUD and a positive AUDIT score [per 100 people screened] (95% UI) | Number of people needed to screen to treat one AUD case (95% UI) |               |
|-----------|-------|-----------------------------|-----------------------|-----------------|-------------|----------------------|----------------------|--------------------------------------------------------------------------------------|---------------------------------------------------------------------------------------------|------------------------------------------------------------------|---------------|
| Sri Lanka | Women | 10                          | 0.5                   | 7               | 0.90        | 0.889                | 0.848 (0.812, 0.881) | 0.4 (0.1, 1.0)                                                                       | 11.1 (8.7, 13.7)                                                                            | 262 (104, 672)                                                   |               |
|           |       | 10                          | 0.5                   | 9               | 0.95        | 0.944                | 0.810 (0.764, 0.853) | 0.4 (0.1, 0.9)                                                                       | 5.6 (3.6, 7.9)                                                                              | 274 (109, 698)                                                   |               |
|           |       | 10                          | 0.5                   | 11              | 0.98        | 0.979                | 0.773 (0.711, 0.831) | 0.3 (0.1, 0.9)                                                                       | 2.1 (0.7, 4.0)                                                                              | 287 (114, 736)                                                   |               |
|           | Men   | 10                          | 5.9                   | 13              | 0.90        | 0.901                | 0.829 (0.784, 0.870) | 4.9 (3.8, 6.2)                                                                       | 9.3 (7.4, 11.4)                                                                             | 21 (16, 27)                                                      |               |
|           |       | 10                          | 5.9                   | 16              | 0.95        | 0.949                | 0.810 (0.753, 0.866) | 4.8 (3.7, 6.1)                                                                       | 4.8 (3.0, 6.7)                                                                              | 21 (16, 27)                                                      |               |
|           |       | 10                          | 5.9                   | 19              | 0.98        | 0.981                | 0.792 (0.719, 0.861) | 4.7 (3.6, 6.0)                                                                       | 1.8 (0.5, 3.5)                                                                              | 22 (17, 28)                                                      |               |
|           | Sudan | Women                       | 10                    | 0.7             | 7           | 0.90                 | 0.889                | 0.848 (0.812, 0.881)                                                                 | 0.6 (0.3, 1.2)                                                                              | 11 (8.7, 13.7)                                                   | 173 (83, 367) |
|           |       |                             | 10                    | 0.7             | 9           | 0.95                 | 0.944                | 0.810 (0.764, 0.853)                                                                 | 0.6 (0.3, 1.1)                                                                              | 5.6 (3.6, 7.9)                                                   | 181 (87, 390) |
|           |       |                             | 10                    | 0.7             | 11          | 0.98                 | 0.979                | 0.773 (0.711, 0.831)                                                                 | 0.5 (0.2, 1.1)                                                                              | 2.1 (0.7, 4.0)                                                   | 190 (91, 409) |
| Men       |       | 10                          | 2.3                   | 13              | 0.90        | 0.901                | 0.829 (0.784, 0.870) | 1.9 (1.3, 2.9)                                                                       | 9.7 (7.7, 11.8)                                                                             | 52 (35, 79)                                                      |               |
|           |       | 10                          | 2.3                   | 16              | 0.95        | 0.949                | 0.810 (0.753, 0.866) | 1.9 (1.2, 2.8)                                                                       | 5 (3.1, 6.9)                                                                                | 53 (36, 81)                                                      |               |
|           |       | 10                          | 2.3                   | 19              | 0.98        | 0.981                | 0.792 (0.719, 0.861) | 1.8 (1.2, 2.7)                                                                       | 1.9 (0.5, 3.6)                                                                              | 54 (37, 84)                                                      |               |
| Suriname  | Women | 10                          | 0.3                   | 7               | 0.90        | 0.889                | 0.848 (0.812, 0.881) | 0.3 (0.1, 0.9)                                                                       | 11.1 (8.8, 13.7)                                                                            | 345 (111, 991)                                                   |               |
|           |       | 10                          | 0.3                   | 9               | 0.95        | 0.944                | 0.810 (0.764, 0.853) | 0.3 (0.1, 0.9)                                                                       | 5.6 (3.6, 7.9)                                                                              | 361 (117, 1037)                                                  |               |
|           |       | 10                          | 0.3                   | 11              | 0.98        | 0.979                | 0.773 (0.711, 0.831) | 0.3 (0.1, 0.8)                                                                       | 2.1 (0.7, 4.1)                                                                              | 379 (122, 1086)                                                  |               |
|           | Men   | 10                          | 10.0                  | 13              | 0.90        | 0.901                | 0.829 (0.784, 0.870) | 8.3 (7.0, 10.1)                                                                      | 8.9 (7.1, 10.9)                                                                             | 12 (10, 14)                                                      |               |
|           |       | 10                          | 10.0                  | 16              | 0.95        | 0.949                | 0.810 (0.753, 0.866) | 8.1 (6.8, 9.9)                                                                       | 4.6 (2.9, 6.4)                                                                              | 12 (10, 15)                                                      |               |
|           |       | 10                          | 10.0                  | 19              | 0.98        | 0.981                | 0.792 (0.719, 0.861) | 8 (6.6, 9.7)                                                                         | 1.7 (0.5, 3.3)                                                                              | 13 (10, 15)                                                      |               |
|           | Women | 10                          | 3.7                   | 7               | 0.90        | 0.889                | 0.848 (0.812, 0.881) | 3.2 (2.3, 4.3)                                                                       | 10.7 (8.5, 13.2)                                                                            | 32 (23, 44)                                                      |               |
|           |       | 10                          | 3.7                   | 9               | 0.95        | 0.944                | 0.810 (0.764, 0.853) | 3 (2.1, 4.1)                                                                         | 5.4 (3.5, 7.6)                                                                              | 33 (24, 47)                                                      |               |
|           |       | 10                          | 3.7                   | 11              | 0.98        | 0.979                | 0.773 (0.711, 0.831) | 2.9 (2.0, 4.0)                                                                       | 2.1 (0.7, 3.9)                                                                              | 35 (25, 49)                                                      |               |
| Swaziland | Men   | 10                          | 12.0                  | 13              | 0.90        | 0.901                | 0.829 (0.784, 0.870) | 10 (8.3, 11.9)                                                                       | 8.7 (6.9, 10.7)                                                                             | 10 (8, 12)                                                       |               |

| Country     | Sex   | Standard drink size (grams) | Prevalence (%) of AUD | AUDIT cut-point | Specificity | Specificity (actual) | Sensitivity (95% UI) | People who have an AUD and a positive AUDIT score [per 100 people screened] (95% UI) | People who do not have an AUD and a positive AUDIT score [per 100 people screened] (95% UI) | Number of people needed to screen to treat one AUD case (95% UI) |             |
|-------------|-------|-----------------------------|-----------------------|-----------------|-------------|----------------------|----------------------|--------------------------------------------------------------------------------------|---------------------------------------------------------------------------------------------|------------------------------------------------------------------|-------------|
| Sweden      | Women | 10                          | 12.0                  | 16              | 0.95        | 0.949                | 0.810 (0.753, 0.866) | 9.7 (8.0, 11.6)                                                                      | 4.5 (2.8, 6.3)                                                                              | 10 (9, 12)                                                       |             |
|             |       | 10                          | 12.0                  | 19              | 0.98        | 0.981                | 0.792 (0.719, 0.861) | 9.5 (7.7, 11.5)                                                                      | 1.7 (0.5, 3.2)                                                                              | 10 (9, 13)                                                       |             |
|             |       | 10                          | 2.4                   | 7               | 0.90        | 0.889                | 0.848 (0.812, 0.881) | 2 (1.3, 2.9)                                                                         | 10.9 (8.6, 13.4)                                                                            | 50 (34, 75)                                                      |             |
|             |       | 10                          | 2.4                   | 9               | 0.95        | 0.944                | 0.810 (0.764, 0.853) | 1.9 (1.3, 2.8)                                                                       | 5.5 (3.6, 7.7)                                                                              | 52 (36, 78)                                                      |             |
|             |       | 10                          | 2.4                   | 11              | 0.98        | 0.979                | 0.773 (0.711, 0.831) | 1.8 (1.2, 2.7)                                                                       | 2.1 (0.7, 4.0)                                                                              | 54 (37, 82)                                                      |             |
|             | Men   | 10                          | 14.7                  | 13              | 0.90        | 0.901                | 0.829 (0.784, 0.870) | 12.2 (10.3, 14.4)                                                                    | 8.5 (6.7, 10.3)                                                                             | 8 (7, 10)                                                        |             |
|             |       | 10                          | 14.7                  | 16              | 0.95        | 0.949                | 0.810 (0.753, 0.866) | 11.9 (10.0, 14.2)                                                                    | 4.3 (2.7, 6.1)                                                                              | 8 (7, 10)                                                        |             |
|             |       | 10                          | 14.7                  | 19              | 0.98        | 0.981                | 0.792 (0.719, 0.861) | 11.6 (9.6, 14.0)                                                                     | 1.6 (0.5, 3.2)                                                                              | 9 (7, 10)                                                        |             |
|             |       | Women                       | 10                    | 7.3             | 7           | 0.90                 | 0.889                | 0.848 (0.812, 0.881)                                                                 | 6.2 (5.0, 7.7)                                                                              | 10.3 (8.2, 12.8)                                                 | 16 (13, 20) |
|             |       |                             | 10                    | 7.3             | 9           | 0.95                 | 0.944                | 0.810 (0.764, 0.853)                                                                 | 5.9 (4.8, 7.4)                                                                              | 5.2 (3.4, 7.4)                                                   | 17 (14, 21) |
| Switzerland | Men   | 10                          | 7.3                   | 11              | 0.98        | 0.979                | 0.773 (0.711, 0.831) | 5.6 (4.5, 7.1)                                                                       | 2 (0.7, 3.8)                                                                                | 18 (14, 22)                                                      |             |
|             |       | 11                          | 16.1                  | 12              | 0.90        | 0.89                 | 0.819 (0.781, 0.854) | 13.2 (11.2, 15.3)                                                                    | 9.2 (7.6, 10.8)                                                                             | 8 (7, 9)                                                         |             |
|             |       | 11                          | 16.1                  | 16              | 0.95        | 0.956                | 0.792 (0.736, 0.847) | 12.8 (10.8, 14.9)                                                                    | 3.7 (2.2, 5.2)                                                                              | 8 (7, 9)                                                         |             |
|             |       | 11                          | 16.1                  | 18              | 0.98        | 0.977                | 0.780 (0.715, 0.844) | 12.6 (10.5, 14.8)                                                                    | 1.9 (0.7, 3.4)                                                                              | 8 (7, 9)                                                         |             |
|             |       | Women                       | 11                    | 3.2             | 7           | 0.90                 | 0.89                 | 0.825 (0.795, 0.852)                                                                 | 2.6 (1.9, 3.6)                                                                              | 10.6 (8.8, 12.6)                                                 | 38 (28, 53) |
|             | 11    |                             | 3.2                   | 9               | 0.95        | 0.945                | 0.784 (0.742, 0.824) | 2.5 (1.8, 3.5)                                                                       | 5.3 (3.7, 7.2)                                                                              | 40 (29, 56)                                                      |             |
|             | Men   | 11                          | 3.2                   | 11              | 0.98        | 0.979                | 0.746 (0.687, 0.803) | 2.4 (1.7, 3.3)                                                                       | 2 (0.8, 3.6)                                                                                | 42 (30, 59)                                                      |             |
|             |       | 10                          | 1.0                   | 13              | 0.90        | 0.901                | 0.829 (0.784, 0.870) | 0.9 (0.5, 1.6)                                                                       | 9.8 (7.8, 12.0)                                                                             | 116 (64, 207)                                                    |             |
|             |       | 10                          | 1.0                   | 16              | 0.95        | 0.949                | 0.810 (0.753, 0.866) | 0.8 (0.5, 1.5)                                                                       | 5 (3.1, 7.1)                                                                                | 118 (66, 209)                                                    |             |
|             |       | 10                          | 1.0                   | 19              | 0.98        | 0.981                | 0.792 (0.719, 0.861) | 0.8 (0.5, 1.5)                                                                       | 1.9 (0.5, 3.6)                                                                              | 121 (67, 213)                                                    |             |
| Women       |       | 10                          | 0.1                   | 7               | 0.90        | 0.889                | 0.848 (0.812, 0.881) | 0.1 (<0.1, 0.5)                                                                      | 11.1 (8.8, 13.7)                                                                            | 1096 (184, 6086)                                                 |             |
|             | 10    | 0.1                         | 9                     | 0.95            | 0.944       | 0.810 (0.764, 0.853) | 0.1 (<0.1, 0.5)      | 5.6 (3.6, 7.9)                                                                       | 1148 (189, 6487)                                                                            |                                                                  |             |

| Country                                     | Sex   | Standard drink size (grams) | Prevalence (%) of AUD | AUDIT cut-point | Specificity | Specificity (actual) | Sensitivity (95% UI) | People who have an AUD and a positive AUDIT score [per 100 people screened] (95% UI) | People who do not have an AUD and a positive AUDIT score [per 100 people screened] (95% UI) | Number of people needed to screen to treat one AUD case (95% UI) |
|---------------------------------------------|-------|-----------------------------|-----------------------|-----------------|-------------|----------------------|----------------------|--------------------------------------------------------------------------------------|---------------------------------------------------------------------------------------------|------------------------------------------------------------------|
| Tajikistan                                  | Men   | 10                          | 0.1                   | 11              | 0.98        | 0.979                | 0.773 (0.711, 0.831) | 0.1 (<0.1, 0.5)                                                                      | 2.1 (0.7, 4.1)                                                                              | 1203 (200, 6796)                                                 |
|                                             |       | 10                          | 1.6                   | 13              | 0.90        | 0.901                | 0.829 (0.784, 0.870) | 1.3 (0.8, 2.1)                                                                       | 9.8 (7.8, 11.9)                                                                             | 76 (48, 119)                                                     |
|                                             |       | 10                          | 1.6                   | 16              | 0.95        | 0.949                | 0.810 (0.753, 0.866) | 1.3 (0.8, 2.0)                                                                       | 5 (3.1, 7.0)                                                                                | 77 (49, 123)                                                     |
|                                             | Women | 10                          | 1.6                   | 19              | 0.98        | 0.981                | 0.792 (0.719, 0.861) | 1.3 (0.8, 2.0)                                                                       | 1.9 (0.5, 3.6)                                                                              | 79 (50, 126)                                                     |
|                                             |       | 10                          | 0.3                   | 7               | 0.90        | 0.889                | 0.848 (0.812, 0.881) | 0.3 (0.1, 0.7)                                                                       | 11.1 (8.8, 13.7)                                                                            | 389 (141, 1105)                                                  |
|                                             |       | 10                          | 0.3                   | 9               | 0.95        | 0.944                | 0.810 (0.764, 0.853) | 0.2 (0.1, 0.7)                                                                       | 5.6 (3.6, 7.9)                                                                              | 408 (147, 1174)                                                  |
| Thailand                                    | Men   | 10                          | 0.3                   | 11              | 0.98        | 0.979                | 0.773 (0.711, 0.831) | 0.2 (0.1, 0.7)                                                                       | 2.1 (0.7, 4.1)                                                                              | 427 (153, 1250)                                                  |
|                                             |       | 10                          | 10.0                  | 13              | 0.90        | 0.901                | 0.829 (0.784, 0.870) | 8.3 (6.9, 10.2)                                                                      | 8.9 (7.1, 10.9)                                                                             | 12 (10, 15)                                                      |
|                                             |       | 10                          | 10.0                  | 16              | 0.95        | 0.949                | 0.810 (0.753, 0.866) | 8.1 (6.7, 10.0)                                                                      | 4.6 (2.8, 6.4)                                                                              | 12 (10, 15)                                                      |
|                                             | Women | 10                          | 10.0                  | 19              | 0.98        | 0.981                | 0.792 (0.719, 0.861) | 7.9 (6.5, 9.9)                                                                       | 1.7 (0.5, 3.3)                                                                              | 13 (10, 15)                                                      |
|                                             |       | 10                          | 0.9                   | 7               | 0.90        | 0.889                | 0.848 (0.812, 0.881) | 0.8 (0.4, 1.5)                                                                       | 11 (8.7, 13.6)                                                                              | 125 (66, 235)                                                    |
|                                             |       | 10                          | 0.9                   | 9               | 0.95        | 0.944                | 0.810 (0.764, 0.853) | 0.8 (0.4, 1.4)                                                                       | 5.6 (3.6, 7.8)                                                                              | 131 (69, 247)                                                    |
| Macedonia (the former Yugoslav Republic of) | Men   | 10                          | 0.9                   | 11              | 0.98        | 0.979                | 0.773 (0.711, 0.831) | 0.7 (0.4, 1.4)                                                                       | 2.1 (0.7, 4.0)                                                                              | 138 (73, 258)                                                    |
|                                             |       | 10                          | 9.9                   | 13              | 0.90        | 0.901                | 0.829 (0.784, 0.870) | 8.2 (6.8, 10.0)                                                                      | 8.9 (7.1, 11.0)                                                                             | 12 (10, 15)                                                      |
|                                             |       | 10                          | 9.9                   | 16              | 0.95        | 0.949                | 0.810 (0.753, 0.866) | 8 (6.6, 9.8)                                                                         | 4.6 (2.9, 6.4)                                                                              | 12 (10, 15)                                                      |
|                                             | Women | 10                          | 9.9                   | 19              | 0.98        | 0.981                | 0.792 (0.719, 0.861) | 7.8 (6.4, 9.6)                                                                       | 1.7 (0.5, 3.3)                                                                              | 13 (10, 16)                                                      |
|                                             |       | 10                          | 2.1                   | 7               | 0.90        | 0.889                | 0.848 (0.812, 0.881) | 1.8 (1.2, 2.7)                                                                       | 10.9 (8.7, 13.5)                                                                            | 55 (37, 86)                                                      |
|                                             |       | 10                          | 2.1                   | 9               | 0.95        | 0.944                | 0.810 (0.764, 0.853) | 1.7 (1.1, 2.6)                                                                       | 5.5 (3.6, 7.7)                                                                              | 58 (39, 91)                                                      |
| Timor-Leste                                 | Men   | 10                          | 2.1                   | 11              | 0.98        | 0.979                | 0.773 (0.711, 0.831) | 1.7 (1.0, 2.5)                                                                       | 2.1 (0.7, 4.0)                                                                              | 60 (41, 95)                                                      |
|                                             |       | 10                          | 3.0                   | 13              | 0.90        | 0.901                | 0.829 (0.784, 0.870) | 2.5 (1.7, 3.5)                                                                       | 9.6 (7.6, 11.8)                                                                             | 41 (29, 60)                                                      |
|                                             |       | 10                          | 3.0                   | 16              | 0.95        | 0.949                | 0.810 (0.753, 0.866) | 2.4 (1.6, 3.4)                                                                       | 4.9 (3.1, 6.9)                                                                              | 42 (29, 61)                                                      |

| Country             | Sex   | Standard drink size (grams) | Prevalence (%) of AUD | AUDIT cut-point | Specificity | Specificity (actual) | Sensitivity (95% UI) | People who have an AUD and a positive AUDIT score [per 100 people screened] (95% UI) | People who do not have an AUD and a positive AUDIT score [per 100 people screened] (95% UI) | Number of people needed to screen to treat one AUD case (95% UI) |
|---------------------|-------|-----------------------------|-----------------------|-----------------|-------------|----------------------|----------------------|--------------------------------------------------------------------------------------|---------------------------------------------------------------------------------------------|------------------------------------------------------------------|
| Togo                | Women | 10                          | 3.0                   | 19              | 0.98        | 0.981                | 0.792 (0.719, 0.861) | 2.3 (1.6, 3.3)                                                                       | 1.9 (0.5, 3.6)                                                                              | 43 (30, 63)                                                      |
|                     |       | 10                          | 0.6                   | 7               | 0.90        | 0.889                | 0.848 (0.812, 0.881) | 0.5 (0.2, 1.1)                                                                       | 11.1 (8.8, 13.6)                                                                            | 211 (90, 495)                                                    |
|                     |       | 10                          | 0.6                   | 9               | 0.95        | 0.944                | 0.810 (0.764, 0.853) | 0.5 (0.2, 1.1)                                                                       | 5.6 (3.6, 7.9)                                                                              | 221 (95, 518)                                                    |
|                     |       | 10                          | 0.6                   | 11              | 0.98        | 0.979                | 0.773 (0.711, 0.831) | 0.4 (0.2, 1.0)                                                                       | 2.1 (0.7, 4.0)                                                                              | 232 (99, 547)                                                    |
|                     |       | 10                          | 15.1                  | 13              | 0.90        | 0.901                | 0.829 (0.784, 0.870) | 12.5 (10.7, 14.6)                                                                    | 8.4 (6.7, 10.3)                                                                             | 8 (7, 9)                                                         |
|                     | Men   | 10                          | 15.1                  | 16              | 0.95        | 0.949                | 0.810 (0.753, 0.866) | 12.3 (10.3, 14.4)                                                                    | 4.3 (2.7, 6.1)                                                                              | 8 (7, 10)                                                        |
|                     |       | 10                          | 15.1                  | 19              | 0.98        | 0.981                | 0.792 (0.719, 0.861) | 12 (10.0, 14.1)                                                                      | 1.6 (0.5, 3.1)                                                                              | 8 (7, 10)                                                        |
|                     |       | 10                          | 4.0                   | 7               | 0.90        | 0.889                | 0.848 (0.812, 0.881) | 3.4 (2.5, 4.7)                                                                       | 10.7 (8.4, 13.2)                                                                            | 29 (21, 39)                                                      |
|                     |       | 10                          | 4.0                   | 9               | 0.95        | 0.944                | 0.810 (0.764, 0.853) | 3.3 (2.4, 4.5)                                                                       | 5.4 (3.5, 7.6)                                                                              | 31 (22, 41)                                                      |
|                     |       | 10                          | 4.0                   | 11              | 0.98        | 0.979                | 0.773 (0.711, 0.831) | 3.1 (2.3, 4.3)                                                                       | 2 (0.7, 3.9)                                                                                | 32 (23, 43)                                                      |
| Tonga               | Men   | 10                          | 8.8                   | 13              | 0.90        | 0.901                | 0.829 (0.784, 0.870) | 7.3 (6.0, 9.0)                                                                       | 9.1 (7.1, 11.0)                                                                             | 14 (11, 17)                                                      |
|                     |       | 10                          | 8.8                   | 16              | 0.95        | 0.949                | 0.810 (0.753, 0.866) | 7.1 (5.9, 8.7)                                                                       | 4.6 (2.9, 6.5)                                                                              | 14 (11, 17)                                                      |
|                     |       | 10                          | 8.8                   | 19              | 0.98        | 0.981                | 0.792 (0.719, 0.861) | 6.9 (5.7, 8.6)                                                                       | 1.8 (0.5, 3.4)                                                                              | 14 (12, 18)                                                      |
|                     |       | 10                          | 1.8                   | 7               | 0.90        | 0.889                | 0.848 (0.812, 0.881) | 1.5 (0.9, 2.4)                                                                       | 10.9 (8.7, 13.5)                                                                            | 67 (41, 105)                                                     |
|                     |       | 10                          | 1.8                   | 9               | 0.95        | 0.944                | 0.810 (0.764, 0.853) | 1.4 (0.9, 2.3)                                                                       | 5.5 (3.6, 7.8)                                                                              | 70 (43, 110)                                                     |
|                     | Women | 10                          | 1.8                   | 11              | 0.98        | 0.979                | 0.773 (0.711, 0.831) | 1.4 (0.9, 2.2)                                                                       | 2.1 (0.7, 4.0)                                                                              | 73 (45, 117)                                                     |
|                     |       | 10                          | 9.9                   | 13              | 0.90        | 0.901                | 0.829 (0.784, 0.870) | 8.2 (6.7, 10.0)                                                                      | 8.9 (7.1, 10.9)                                                                             | 12 (10, 15)                                                      |
|                     |       | 10                          | 9.9                   | 16              | 0.95        | 0.949                | 0.810 (0.753, 0.866) | 8 (6.5, 9.7)                                                                         | 4.6 (2.8, 6.4)                                                                              | 12 (10, 15)                                                      |
|                     |       | 10                          | 9.9                   | 19              | 0.98        | 0.981                | 0.792 (0.719, 0.861) | 7.9 (6.3, 9.6)                                                                       | 1.7 (0.5, 3.3)                                                                              | 13 (10, 16)                                                      |
|                     |       | 10                          | 3.7                   | 7               | 0.90        | 0.889                | 0.848 (0.812, 0.881) | 3.1 (2.3, 4.2)                                                                       | 10.7 (8.5, 13.2)                                                                            | 32 (24, 43)                                                      |
| Trinidad and Tobago | Men   | 10                          | 3.7                   | 9               | 0.95        | 0.944                | 0.810 (0.764, 0.853) | 3 (2.2, 4.0)                                                                         | 5.4 (3.5, 7.6)                                                                              | 33 (25, 45)                                                      |
|                     |       | 10                          | 3.7                   | 11              | 0.98        | 0.979                | 0.773 (0.711, 0.831) | 2.9 (2.1, 3.9)                                                                       | 2.1 (0.7, 3.9)                                                                              | 35 (26, 48)                                                      |

| Country      | Sex   | Standard drink size (grams) | Prevalence (%) of AUD | AUDIT cut-point | Specificity | Specificity (actual) | Sensitivity (95% UI) | People who have an AUD and a positive AUDIT score [per 100 people screened] (95% UI) | People who do not have an AUD and a positive AUDIT score [per 100 people screened] (95% UI) | Number of people needed to screen to treat one AUD case (95% UI) |
|--------------|-------|-----------------------------|-----------------------|-----------------|-------------|----------------------|----------------------|--------------------------------------------------------------------------------------|---------------------------------------------------------------------------------------------|------------------------------------------------------------------|
| Tunisia      | Men   | 10                          | 1.1                   | 13              | 0.90        | 0.901                | 0.829 (0.784, 0.870) | 0.9 (0.5, 1.6)                                                                       | 9.8 (7.8, 12.0)                                                                             | 109 (61, 191)                                                    |
|              |       | 10                          | 1.1                   | 16              | 0.95        | 0.949                | 0.810 (0.753, 0.866) | 0.9 (0.5, 1.6)                                                                       | 5 (3.1, 7.0)                                                                                | 111 (62, 198)                                                    |
|              |       | 10                          | 1.1                   | 19              | 0.98        | 0.981                | 0.792 (0.719, 0.861) | 0.9 (0.5, 1.6)                                                                       | 1.9 (0.5, 3.6)                                                                              | 114 (63, 202)                                                    |
|              | Women | 10                          | 0.2                   | 7               | 0.90        | 0.889                | 0.848 (0.812, 0.881) | 0.2 (<0.1, 0.7)                                                                      | 11.1 (8.8, 13.7)                                                                            | 650 (153, 2748)                                                  |
|              |       | 10                          | 0.2                   | 9               | 0.95        | 0.944                | 0.810 (0.764, 0.853) | 0.1 (<0.1, 0.6)                                                                      | 5.6 (3.6, 7.9)                                                                              | 680 (159, 2864)                                                  |
|              |       | 10                          | 0.2                   | 11              | 0.98        | 0.979                | 0.773 (0.711, 0.831) | 0.1 (<0.1, 0.6)                                                                      | 2.1 (0.7, 4.1)                                                                              | 713 (169, 3004)                                                  |
| Turkey       | Men   | 10                          | 8.1                   | 13              | 0.90        | 0.901                | 0.829 (0.784, 0.870) | 6.7 (5.4, 8.4)                                                                       | 9.1 (7.2, 11.1)                                                                             | 15 (12, 19)                                                      |
|              |       | 10                          | 8.1                   | 16              | 0.95        | 0.949                | 0.810 (0.753, 0.866) | 6.6 (5.2, 8.2)                                                                       | 4.7 (2.9, 6.5)                                                                              | 15 (12, 19)                                                      |
|              |       | 10                          | 8.1                   | 19              | 0.98        | 0.981                | 0.792 (0.719, 0.861) | 6.4 (5.1, 8.0)                                                                       | 1.8 (0.5, 3.4)                                                                              | 16 (12, 20)                                                      |
|              | Women | 10                          | 1.7                   | 7               | 0.90        | 0.889                | 0.848 (0.812, 0.881) | 1.4 (0.9, 2.3)                                                                       | 10.9 (8.6, 13.5)                                                                            | 69 (44, 113)                                                     |
|              |       | 10                          | 1.7                   | 9               | 0.95        | 0.944                | 0.810 (0.764, 0.853) | 1.4 (0.8, 2.2)                                                                       | 5.5 (3.6, 7.8)                                                                              | 73 (46, 118)                                                     |
|              |       | 10                          | 1.7                   | 11              | 0.98        | 0.979                | 0.773 (0.711, 0.831) | 1.3 (0.8, 2.1)                                                                       | 2.1 (0.7, 4.0)                                                                              | 76 (48, 126)                                                     |
| Turkmenistan | Men   | 10                          | 9.9                   | 13              | 0.90        | 0.901                | 0.829 (0.784, 0.870) | 8.2 (6.8, 10.0)                                                                      | 8.9 (7.1, 10.9)                                                                             | 12 (10, 15)                                                      |
|              |       | 10                          | 9.9                   | 16              | 0.95        | 0.949                | 0.810 (0.753, 0.866) | 8.1 (6.6, 9.8)                                                                       | 4.6 (2.9, 6.4)                                                                              | 12 (10, 15)                                                      |
|              |       | 10                          | 9.9                   | 19              | 0.98        | 0.981                | 0.792 (0.719, 0.861) | 7.9 (6.4, 9.7)                                                                       | 1.7 (0.5, 3.3)                                                                              | 13 (10, 16)                                                      |
|              | Women | 10                          | 2.1                   | 7               | 0.90        | 0.889                | 0.848 (0.812, 0.881) | 1.8 (1.2, 2.8)                                                                       | 10.9 (8.6, 13.4)                                                                            | 56 (36, 84)                                                      |
|              |       | 10                          | 2.1                   | 9               | 0.95        | 0.944                | 0.810 (0.764, 0.853) | 1.7 (1.1, 2.6)                                                                       | 5.5 (3.6, 7.7)                                                                              | 58 (38, 89)                                                      |
|              |       | 10                          | 2.1                   | 11              | 0.98        | 0.979                | 0.773 (0.711, 0.831) | 1.6 (1.1, 2.5)                                                                       | 2.1 (0.7, 4.0)                                                                              | 61 (40, 93)                                                      |
| Tuvalu       | Men   | 10                          | 8.9                   | 13              | 0.90        | 0.901                | 0.829 (0.784, 0.870) | 7.4 (6.0, 9.0)                                                                       | 9 (7.2, 11.0)                                                                               | 14 (11, 17)                                                      |
|              |       | 10                          | 8.9                   | 16              | 0.95        | 0.949                | 0.810 (0.753, 0.866) | 7.2 (5.9, 8.8)                                                                       | 4.6 (2.9, 6.5)                                                                              | 14 (11, 17)                                                      |
|              |       | 10                          | 8.9                   | 19              | 0.98        | 0.981                | 0.792 (0.719, 0.861) | 7 (5.7, 8.6)                                                                         | 1.7 (0.5, 3.4)                                                                              | 14 (12, 18)                                                      |
|              | Women | 10                          | 1.8                   | 7               | 0.90        | 0.889                | 0.848 (0.812, 0.881) | 1.5 (0.9, 2.3)                                                                       | 10.9 (8.6, 13.5)                                                                            | 67 (43, 107)                                                     |

| Country                         | Sex   | Standard drink size (grams) | Prevalence (%) of AUD | AUDIT cut-point | Specificity | Specificity (actual) | Sensitivity (95% UI) | People who have an AUD and a positive AUDIT score [per 100 people screened] (95% UI) | People who do not have an AUD and a positive AUDIT score [per 100 people screened] (95% UI) | Number of people needed to screen to treat one AUD case (95% UI) |
|---------------------------------|-------|-----------------------------|-----------------------|-----------------|-------------|----------------------|----------------------|--------------------------------------------------------------------------------------|---------------------------------------------------------------------------------------------|------------------------------------------------------------------|
| Uganda                          | Men   | 10                          | 1.8                   | 9               | 0.95        | 0.944                | 0.810 (0.764, 0.853) | 1.4 (0.9, 2.2)                                                                       | 5.5 (3.6, 7.8)                                                                              | 70 (44, 113)                                                     |
|                                 |       | 10                          | 1.8                   | 11              | 0.98        | 0.979                | 0.773 (0.711, 0.831) | 1.4 (0.8, 2.2)                                                                       | 2.1 (0.7, 4.0)                                                                              | 73 (46, 119)                                                     |
|                                 |       | 10                          | 12.4                  | 13              | 0.90        | 0.901                | 0.829 (0.784, 0.870) | 10.3 (8.7, 12.1)                                                                     | 8.7 (6.9, 10.6)                                                                             | 10 (8, 11)                                                       |
|                                 | Women | 10                          | 12.4                  | 16              | 0.95        | 0.949                | 0.810 (0.753, 0.866) | 10.1 (8.5, 11.8)                                                                     | 4.4 (2.8, 6.2)                                                                              | 10 (8, 12)                                                       |
|                                 |       | 10                          | 12.4                  | 19              | 0.98        | 0.981                | 0.792 (0.719, 0.861) | 9.8 (8.3, 11.7)                                                                      | 1.7 (0.5, 3.2)                                                                              | 10 (9, 12)                                                       |
|                                 |       | 10                          | 1.9                   | 7               | 0.90        | 0.889                | 0.848 (0.812, 0.881) | 1.6 (1.0, 2.5)                                                                       | 10.9 (8.6, 13.5)                                                                            | 64 (40, 100)                                                     |
| Ukraine                         | Men   | 10                          | 1.9                   | 9               | 0.95        | 0.944                | 0.810 (0.764, 0.853) | 1.5 (0.9, 2.4)                                                                       | 5.5 (3.6, 7.8)                                                                              | 67 (42, 106)                                                     |
|                                 |       | 10                          | 1.9                   | 11              | 0.98        | 0.979                | 0.773 (0.711, 0.831) | 1.4 (0.9, 2.3)                                                                       | 2.1 (0.7, 4.0)                                                                              | 70 (44, 112)                                                     |
|                                 |       | 10                          | 11.5                  | 13              | 0.90        | 0.901                | 0.829 (0.784, 0.870) | 9.5 (7.9, 11.3)                                                                      | 8.8 (7.0, 10.7)                                                                             | 11 (9, 13)                                                       |
|                                 | Women | 10                          | 11.5                  | 16              | 0.95        | 0.949                | 0.810 (0.753, 0.866) | 9.3 (7.7, 11.2)                                                                      | 4.5 (2.8, 6.3)                                                                              | 11 (9, 13)                                                       |
|                                 |       | 10                          | 11.5                  | 19              | 0.98        | 0.981                | 0.792 (0.719, 0.861) | 9.1 (7.4, 11.0)                                                                      | 1.7 (0.5, 3.3)                                                                              | 11 (9, 13)                                                       |
|                                 |       | 10                          | 1.4                   | 7               | 0.90        | 0.889                | 0.848 (0.812, 0.881) | 1.2 (0.7, 2.0)                                                                       | 11 (8.7, 13.5)                                                                              | 85 (51, 149)                                                     |
| United Arab Emirates            | Men   | 10                          | 1.4                   | 9               | 0.95        | 0.944                | 0.810 (0.764, 0.853) | 1.1 (0.6, 1.9)                                                                       | 5.5 (3.6, 7.8)                                                                              | 89 (54, 158)                                                     |
|                                 |       | 10                          | 1.4                   | 11              | 0.98        | 0.979                | 0.773 (0.711, 0.831) | 1.1 (0.6, 1.8)                                                                       | 2.1 (0.7, 4.0)                                                                              | 93 (56, 165)                                                     |
|                                 |       | 10                          | 0.8                   | 13              | 0.90        | 0.901                | 0.829 (0.784, 0.870) | 0.7 (0.4, 1.2)                                                                       | 9.8 (7.8, 12.0)                                                                             | 147 (82, 282)                                                    |
|                                 | Women | 10                          | 0.8                   | 16              | 0.95        | 0.949                | 0.810 (0.753, 0.866) | 0.7 (0.3, 1.2)                                                                       | 5 (3.1, 7.1)                                                                                | 151 (84, 294)                                                    |
|                                 |       | 10                          | 0.8                   | 19              | 0.98        | 0.981                | 0.792 (0.719, 0.861) | 0.6 (0.3, 1.2)                                                                       | 1.9 (0.5, 3.6)                                                                              | 154 (85, 307)                                                    |
|                                 |       | 10                          | 0.2                   | 7               | 0.90        | 0.889                | 0.848 (0.812, 0.881) | 0.1 (<0.1, 0.6)                                                                      | 11.1 (8.8, 13.7)                                                                            | 780 (155, 4264)                                                  |
| United Kingdom of Great Britain | Men   | 10                          | 0.2                   | 9               | 0.95        | 0.944                | 0.810 (0.764, 0.853) | 0.1 (<0.1, 0.6)                                                                      | 5.6 (3.6, 7.9)                                                                              | 817 (163, 4528)                                                  |
|                                 |       | 10                          | 0.2                   | 11              | 0.98        | 0.979                | 0.773 (0.711, 0.831) | 0.1 (<0.1, 0.6)                                                                      | 2.1 (0.7, 4.1)                                                                              | 856 (168, 4746)                                                  |
|                                 |       | 8                           | 13.0                  | 14              | 0.90        | 0.901                | 0.855 (0.797, 0.910) | 11.1 (9.2, 13.0)                                                                     | 8.7 (6.2, 11.4)                                                                             | 9 (8, 11)                                                        |

| Country                      | Sex   | Standard drink size (grams) | Prevalence (%) of AUD | AUDIT cut-point | Specificity | Specificity (actual) | Sensitivity (95% UI) | People who have an AUD and a positive AUDIT score [per 100 people screened] (95% UI) | People who do not have an AUD and a positive AUDIT score [per 100 people screened] (95% UI) | Number of people needed to screen to treat one AUD case (95% UI) |  |  |
|------------------------------|-------|-----------------------------|-----------------------|-----------------|-------------|----------------------|----------------------|--------------------------------------------------------------------------------------|---------------------------------------------------------------------------------------------|------------------------------------------------------------------|--|--|
| and Northern Ireland         |       |                             |                       |                 |             |                      |                      |                                                                                      |                                                                                             |                                                                  |  |  |
|                              |       | 8                           | 13.0                  | 17              | 0.95        | 0.948                | 0.838 (0.767, 0.903) | 10.9 (9.0, 12.8)                                                                     | 4.5 (2.5, 7.0)                                                                              | 9 (8, 11)                                                        |  |  |
|                              |       | 8                           | 13.0                  | 20              | 0.98        | 0.979                | 0.821 (0.739, 0.897) | 10.6 (8.7, 12.7)                                                                     | 1.8 (0.4, 3.8)                                                                              | 9 (8, 12)                                                        |  |  |
|                              | Women | 8                           | 4.7                   | 7               | 0.90        | 0.886                | 0.891 (0.834, 0.939) | 4.2 (3.1, 5.5)                                                                       | 10.9 (7.4, 15.1)                                                                            | 24 (18, 32)                                                      |  |  |
|                              |       | 8                           | 4.7                   | 9               | 0.95        | 0.942                | 0.857 (0.788, 0.917) | 4 (3.0, 5.3)                                                                         | 5.6 (2.9, 9.0)                                                                              | 25 (19, 34)                                                      |  |  |
|                              |       | 8                           | 4.7                   | 11              | 0.98        | 0.977                | 0.823 (0.741, 0.895) | 3.8 (2.8, 5.1)                                                                       | 2.2 (0.5, 4.9)                                                                              | 26 (20, 35)                                                      |  |  |
| Tanzania, United Republic of | Men   | 10                          | 11.5                  | 13              | 0.90        | 0.901                | 0.829 (0.784, 0.870) | 9.5 (8.0, 11.2)                                                                      | 8.8 (7.0, 10.8)                                                                             | 10 (9, 13)                                                       |  |  |
|                              |       | 10                          | 11.5                  | 16              | 0.95        | 0.949                | 0.810 (0.753, 0.866) | 9.3 (7.8, 11.0)                                                                      | 4.5 (2.8, 6.3)                                                                              | 11 (9, 13)                                                       |  |  |
|                              |       | 10                          | 11.5                  | 19              | 0.98        | 0.981                | 0.792 (0.719, 0.861) | 9.1 (7.5, 10.8)                                                                      | 1.7 (0.5, 3.3)                                                                              | 11 (9, 13)                                                       |  |  |
|                              | Women | 10                          | 2.2                   | 7               | 0.90        | 0.889                | 0.848 (0.812, 0.881) | 1.9 (1.3, 2.9)                                                                       | 10.9 (8.6, 13.4)                                                                            | 53 (35, 78)                                                      |  |  |
|                              |       | 10                          | 2.2                   | 9               | 0.95        | 0.944                | 0.810 (0.764, 0.853) | 1.8 (1.2, 2.8)                                                                       | 5.5 (3.6, 7.8)                                                                              | 55 (36, 82)                                                      |  |  |
|                              |       | 10                          | 2.2                   | 11              | 0.98        | 0.979                | 0.773 (0.711, 0.831) | 1.7 (1.2, 2.7)                                                                       | 2.1 (0.7, 4.0)                                                                              | 58 (38, 86)                                                      |  |  |
| United States of America     | Men   | 14                          | 17.6                  | 11              | 0.90        | 0.899                | 0.773 (0.717, 0.823) | 13.6 (11.6, 15.7)                                                                    | 8.3 (6.4, 10.4)                                                                             | 7 (6, 9)                                                         |  |  |
|                              |       | 14                          | 17.6                  | 14              | 0.95        | 0.951                | 0.750 (0.683, 0.814) | 13.2 (11.2, 15.3)                                                                    | 4 (2.4, 6.0)                                                                                | 8 (7, 9)                                                         |  |  |
|                              |       | 14                          | 17.6                  | 17              | 0.98        | 0.983                | 0.729 (0.646, 0.806) | 12.8 (10.7, 15.1)                                                                    | 1.4 (0.3, 3.0)                                                                              | 8 (7, 9)                                                         |  |  |
|                              | Women | 14                          | 10.4                  | 7               | 0.90        | 0.895                | 0.748 (0.691, 0.797) | 7.8 (6.4, 9.4)                                                                       | 9.4 (7.2, 12.0)                                                                             | 13 (11, 16)                                                      |  |  |
|                              |       | 14                          | 10.4                  | 9               | 0.95        | 0.948                | 0.703 (0.640, 0.758) | 7.3 (5.9, 9.0)                                                                       | 4.6 (2.9, 6.7)                                                                              | 14 (11, 17)                                                      |  |  |
|                              |       | 14                          | 10.4                  | 11              | 0.98        | 0.981                | 0.661 (0.584, 0.730) | 6.9 (5.5, 8.4)                                                                       | 1.7 (0.5, 3.3)                                                                              | 15 (12, 18)                                                      |  |  |
| Uruguay                      | Men   | 10                          | 9.6                   | 13              | 0.90        | 0.901                | 0.829 (0.784, 0.870) | 8 (6.6, 9.5)                                                                         | 9 (7.1, 11.0)                                                                               | 13 (10, 15)                                                      |  |  |
|                              |       | 10                          | 9.6                   | 16              | 0.95        | 0.949                | 0.810 (0.753, 0.866) | 7.8 (6.5, 9.3)                                                                       | 4.6 (2.8, 6.4)                                                                              | 13 (11, 16)                                                      |  |  |



| Country                            | Sex   | Standard drink size (grams) | Prevalence (%) of AUD | AUDIT cut-point | Specificity | Specificity (actual) | Sensitivity (95% UI) | People who have an AUD and a positive AUDIT score [per 100 people screened] (95% UI) | People who do not have an AUD and a positive AUDIT score [per 100 people screened] (95% UI) | Number of people needed to screen to treat one AUD case (95% UI) |
|------------------------------------|-------|-----------------------------|-----------------------|-----------------|-------------|----------------------|----------------------|--------------------------------------------------------------------------------------|---------------------------------------------------------------------------------------------|------------------------------------------------------------------|
| Uzbekistan                         | Women | 10                          | 9.6                   | 19              | 0.98        | 0.981                | 0.792 (0.719, 0.861) | 7.6 (6.2, 9.2)                                                                       | 1.7 (0.5, 3.3)                                                                              | 13 (11, 16)                                                      |
|                                    |       | 10                          | 3.4                   | 7               | 0.90        | 0.889                | 0.848 (0.812, 0.881) | 2.9 (2.1, 4.0)                                                                       | 10.7 (8.5, 13.3)                                                                            | 34 (25, 48)                                                      |
|                                    |       | 10                          | 3.4                   | 9               | 0.95        | 0.944                | 0.810 (0.764, 0.853) | 2.8 (2.0, 3.8)                                                                       | 5.4 (3.5, 7.6)                                                                              | 36 (26, 51)                                                      |
|                                    |       | 10                          | 3.4                   | 11              | 0.98        | 0.979                | 0.773 (0.711, 0.831) | 2.7 (1.9, 3.6)                                                                       | 2.1 (0.7, 3.9)                                                                              | 38 (28, 53)                                                      |
|                                    |       | 10                          | 9.9                   | 13              | 0.90        | 0.901                | 0.829 (0.784, 0.870) | 8.2 (6.7, 10.0)                                                                      | 8.9 (7.1, 10.9)                                                                             | 12 (10, 15)                                                      |
|                                    | Men   | 10                          | 9.9                   | 16              | 0.95        | 0.949                | 0.810 (0.753, 0.866) | 8 (6.5, 9.8)                                                                         | 4.6 (2.8, 6.4)                                                                              | 12 (10, 15)                                                      |
|                                    |       | 10                          | 9.9                   | 19              | 0.98        | 0.981                | 0.792 (0.719, 0.861) | 7.9 (6.3, 9.7)                                                                       | 1.7 (0.5, 3.3)                                                                              | 13 (10, 16)                                                      |
|                                    |       | 10                          | 2.1                   | 7               | 0.90        | 0.889                | 0.848 (0.812, 0.881) | 1.8 (1.2, 2.7)                                                                       | 10.9 (8.6, 13.4)                                                                            | 56 (37, 86)                                                      |
|                                    |       | 10                          | 2.1                   | 9               | 0.95        | 0.944                | 0.810 (0.764, 0.853) | 1.7 (1.1, 2.6)                                                                       | 5.5 (3.6, 7.8)                                                                              | 58 (39, 91)                                                      |
|                                    |       | 10                          | 2.1                   | 11              | 0.98        | 0.979                | 0.773 (0.711, 0.831) | 1.6 (1.0, 2.5)                                                                       | 2.1 (0.7, 4.0)                                                                              | 61 (41, 96)                                                      |
| Vanuatu                            | Men   | 10                          | 8.8                   | 13              | 0.90        | 0.901                | 0.829 (0.784, 0.870) | 7.3 (5.9, 8.9)                                                                       | 9.1 (7.2, 11.1)                                                                             | 14 (11, 17)                                                      |
|                                    |       | 10                          | 8.8                   | 16              | 0.95        | 0.949                | 0.810 (0.753, 0.866) | 7.1 (5.7, 8.7)                                                                       | 4.6 (2.9, 6.5)                                                                              | 14 (11, 17)                                                      |
|                                    |       | 10                          | 8.8                   | 19              | 0.98        | 0.981                | 0.792 (0.719, 0.861) | 6.9 (5.6, 8.6)                                                                       | 1.8 (0.5, 3.4)                                                                              | 14 (12, 18)                                                      |
|                                    | Women | 10                          | 1.8                   | 7               | 0.90        | 0.889                | 0.848 (0.812, 0.881) | 1.5 (1.0, 2.5)                                                                       | 10.9 (8.6, 13.5)                                                                            | 67 (40, 105)                                                     |
|                                    |       | 10                          | 1.8                   | 9               | 0.95        | 0.944                | 0.810 (0.764, 0.853) | 1.4 (0.9, 2.4)                                                                       | 5.5 (3.6, 7.8)                                                                              | 70 (42, 110)                                                     |
|                                    |       | 10                          | 1.8                   | 11              | 0.98        | 0.979                | 0.773 (0.711, 0.831) | 1.4 (0.9, 2.3)                                                                       | 2.1 (0.7, 4.0)                                                                              | 74 (44, 116)                                                     |
| Venezuela (Bolivarian Republic of) | Men   | 10                          | 10.0                  | 13              | 0.90        | 0.901                | 0.829 (0.784, 0.870) | 8.3 (6.8, 10.2)                                                                      | 8.9 (7.1, 10.9)                                                                             | 12 (10, 15)                                                      |
|                                    |       | 10                          | 10.0                  | 16              | 0.95        | 0.949                | 0.810 (0.753, 0.866) | 8.1 (6.6, 10.0)                                                                      | 4.6 (2.9, 6.4)                                                                              | 12 (10, 15)                                                      |
|                                    |       | 10                          | 10.0                  | 19              | 0.98        | 0.981                | 0.792 (0.719, 0.861) | 8 (6.3, 9.8)                                                                         | 1.7 (0.5, 3.3)                                                                              | 13 (10, 16)                                                      |
|                                    | Women | 10                          | 3.8                   | 7               | 0.90        | 0.889                | 0.848 (0.812, 0.881) | 3.2 (2.3, 4.4)                                                                       | 10.7 (8.5, 13.2)                                                                            | 31 (23, 43)                                                      |
|                                    |       | 10                          | 3.8                   | 9               | 0.95        | 0.944                | 0.810 (0.764, 0.853) | 3 (2.2, 4.2)                                                                         | 5.4 (3.5, 7.7)                                                                              | 33 (24, 46)                                                      |

| Country  | Sex   | Standard drink size (grams) | Prevalence (%) of AUD | AUDIT cut-point | Specificity | Specificity (actual) | Sensitivity (95% UI) | People who have an AUD and a positive AUDIT score [per 100 people screened] (95% UI) | People who do not have an AUD and a positive AUDIT score [per 100 people screened] (95% UI) | Number of people needed to screen to treat one AUD case (95% UI) |             |      |             |
|----------|-------|-----------------------------|-----------------------|-----------------|-------------|----------------------|----------------------|--------------------------------------------------------------------------------------|---------------------------------------------------------------------------------------------|------------------------------------------------------------------|-------------|------|-------------|
| Viet Nam | Men   | 10                          | 3.8                   | 11              | 0.98        | 0.979                | 0.773 (0.711, 0.831) | 2.9                                                                                  | (2.1, 4.0)                                                                                  | 2.1                                                              | (0.7, 3.9)  | 34   | (25, 48)    |
|          |       | 10                          | 9.8                   | 13              | 0.90        | 0.901                | 0.829 (0.784, 0.870) | 8.1                                                                                  | (6.6, 9.8)                                                                                  | 9                                                                | (7.2, 10.9) | 12   | (10, 15)    |
|          |       | 10                          | 9.8                   | 16              | 0.95        | 0.949                | 0.810 (0.753, 0.866) | 7.9                                                                                  | (6.4, 9.6)                                                                                  | 4.6                                                              | (2.9, 6.4)  | 13   | (10, 16)    |
|          | Women | 10                          | 9.8                   | 19              | 0.98        | 0.981                | 0.792 (0.719, 0.861) | 7.7                                                                                  | (6.3, 9.4)                                                                                  | 1.7                                                              | (0.5, 3.3)  | 13   | (11, 16)    |
|          |       | 10                          | 1.2                   | 7               | 0.90        | 0.889                | 0.848 (0.812, 0.881) | 1                                                                                    | (0.6, 1.7)                                                                                  | 11                                                               | (8.7, 13.6) | 99   | (58, 171)   |
|          |       | 10                          | 1.2                   | 9               | 0.95        | 0.944                | 0.810 (0.764, 0.853) | 1                                                                                    | (0.6, 1.6)                                                                                  | 5.5                                                              | (3.6, 7.8)  | 104  | (61, 180)   |
| Yemen    | Men   | 10                          | 1.2                   | 11              | 0.98        | 0.979                | 0.773 (0.711, 0.831) | 0.9                                                                                  | (0.5, 1.6)                                                                                  | 2.1                                                              | (0.7, 4.0)  | 109  | (64, 190)   |
|          |       | 10                          | 0.6                   | 13              | 0.90        | 0.901                | 0.829 (0.784, 0.870) | 0.5                                                                                  | (0.2, 1.1)                                                                                  | 9.9                                                              | (7.9, 12.0) | 198  | (91, 429)   |
|          |       | 10                          | 0.6                   | 16              | 0.95        | 0.949                | 0.810 (0.753, 0.866) | 0.5                                                                                  | (0.2, 1.1)                                                                                  | 5                                                                | (3.1, 7.1)  | 202  | (93, 443)   |
|          | Women | 10                          | 0.6                   | 19              | 0.98        | 0.981                | 0.792 (0.719, 0.861) | 0.5                                                                                  | (0.2, 1.0)                                                                                  | 1.9                                                              | (0.5, 3.6)  | 207  | (95, 460)   |
|          |       | 10                          | 0.1                   | 7               | 0.90        | 0.889                | 0.848 (0.812, 0.881) | 0.1                                                                                  | (<0.1, 0.6)                                                                                 | 11.1                                                             | (8.8, 13.7) | 999  | (175, 6284) |
|          |       | 10                          | 0.1                   | 9               | 0.95        | 0.944                | 0.810 (0.764, 0.853) | 0.1                                                                                  | (<0.1, 0.6)                                                                                 | 5.6                                                              | (3.6, 7.9)  | 1047 | (181, 6563) |
| Zambia   | Men   | 10                          | 0.1                   | 11              | 0.98        | 0.979                | 0.773 (0.711, 0.831) | 0.1                                                                                  | (<0.1, 0.5)                                                                                 | 2.1                                                              | (0.7, 4.1)  | 1097 | (191, 6832) |
|          |       | 10                          | 9.8                   | 13              | 0.90        | 0.901                | 0.829 (0.784, 0.870) | 8.2                                                                                  | (6.7, 9.9)                                                                                  | 9                                                                | (7.1, 10.9) | 12   | (10, 15)    |
|          |       | 10                          | 9.8                   | 16              | 0.95        | 0.949                | 0.810 (0.753, 0.866) | 8                                                                                    | (6.5, 9.7)                                                                                  | 4.6                                                              | (2.9, 6.4)  | 13   | (10, 15)    |
|          | Women | 10                          | 9.8                   | 19              | 0.98        | 0.981                | 0.792 (0.719, 0.861) | 7.8                                                                                  | (6.2, 9.5)                                                                                  | 1.7                                                              | (0.5, 3.3)  | 13   | (10, 16)    |
|          |       | 10                          | 1.2                   | 7               | 0.90        | 0.889                | 0.848 (0.812, 0.881) | 1                                                                                    | (0.6, 1.7)                                                                                  | 11                                                               | (8.7, 13.5) | 100  | (58, 177)   |
|          |       | 10                          | 1.2                   | 9               | 0.95        | 0.944                | 0.810 (0.764, 0.853) | 1                                                                                    | (0.5, 1.6)                                                                                  | 5.5                                                              | (3.6, 7.8)  | 104  | (61, 186)   |
| Zimbabwe | Men   | 10                          | 1.2                   | 11              | 0.98        | 0.979                | 0.773 (0.711, 0.831) | 0.9                                                                                  | (0.5, 1.6)                                                                                  | 2.1                                                              | (0.7, 4.0)  | 109  | (64, 199)   |
|          |       | 10                          | 11.1                  | 13              | 0.90        | 0.901                | 0.829 (0.784, 0.870) | 9.2                                                                                  | (7.6, 11.0)                                                                                 | 8.8                                                              | (7.0, 10.7) | 11   | (9, 13)     |
|          |       | 10                          | 11.1                  | 16              | 0.95        | 0.949                | 0.810 (0.753, 0.866) | 9                                                                                    | (7.4, 10.8)                                                                                 | 4.5                                                              | (2.8, 6.3)  | 11   | (9, 13)     |
|          |       | 10                          | 11.1                  | 19              | 0.98        | 0.981                | 0.792 (0.719, 0.861) | 8.8                                                                                  | (7.2, 10.6)                                                                                 | 1.7                                                              | (0.5, 3.3)  | 11   | (9, 14)     |

| Country | Sex   | Standard drink size (grams) | Prevalence (%) of AUD | AUDIT cut-point | Specificity | Specificity (actual) | Sensitivity (95% UI) | People who have an AUD and a positive AUDIT score [per 100 people screened] (95% UI) | People who do not have an AUD and a positive AUDIT score [per 100 people screened] (95% UI) | Number of people needed to screen to treat one AUD case (95% UI) |
|---------|-------|-----------------------------|-----------------------|-----------------|-------------|----------------------|----------------------|--------------------------------------------------------------------------------------|---------------------------------------------------------------------------------------------|------------------------------------------------------------------|
|         | Women | 10                          | 2.0                   | 7               | 0.90        | 0.889                | 0.848 (0.812, 0.881) | 1.7 (1.1, 2.6)                                                                       | 10.9 (8.6, 13.5)                                                                            | 59 (39, 91)                                                      |
|         |       | 10                          | 2.0                   | 9               | 0.95        | 0.944                | 0.810 (0.764, 0.853) | 1.6 (1.0, 2.5)                                                                       | 5.5 (3.6, 7.8)                                                                              | 62 (40, 96)                                                      |
|         |       | 10                          | 2.0                   | 11              | 0.98        | 0.979                | 0.773 (0.711, 0.831) | 1.5 (1.0, 2.4)                                                                       | 2.1 (0.7, 4.0)                                                                              | 65 (42, 101)                                                     |

AUD: alcohol use disorders; AUDIT: Alcohol Use Disorders Identification Test; UI: Uncertainty Interval

**eTable 6. Screening statistics for alcohol dependence using an AUDIT cut-point which provides specificities of 0.90, 0.95, and 0.98 by country and sex**

| Country     | Sex   | Standard drink size (grams) | Prevalence (%) of AD | AUDIT cut-off score | Specificity | Specificity (actual) | Sensitivity (95% UI) | People who have AD and a positive AUDIT score [per 100 people screened] (95% UI) | People who do not have AD and a positive AUDIT score [per 100 people screened] (95% UI) | Number of people needed to screen to treat one AD case (95% UI) |
|-------------|-------|-----------------------------|----------------------|---------------------|-------------|----------------------|----------------------|----------------------------------------------------------------------------------|-----------------------------------------------------------------------------------------|-----------------------------------------------------------------|
| Afghanistan | Men   | 10                          | 0.3                  | 14                  | 0.90        | 0.902                | 0.747 (0.690, 0.795) | 0.2 (0.1, 0.7)                                                                   | 9.8 (7.0, 13.1)                                                                         | 406 (145, 1141)                                                 |
|             |       | 10                          | 0.3                  | 18                  | 0.95        | 0.954                | 0.647 (0.564, 0.722) | 0.2 (0.1, 0.6)                                                                   | 4.6 (2.1, 7.9)                                                                          | 468 (164, 1324)                                                 |
|             |       | 10                          | 0.3                  | 21                  | 0.98        | 0.979                | 0.576 (0.473, 0.671) | 0.2 (0.1, 0.5)                                                                   | 2.1 (0.2, 5.3)                                                                          | 526 (186, 1496)                                                 |
|             | Women | 10                          | 0.1                  | 10                  | 0.90        | 0.908                | 0.901 (0.859, 0.938) | 0.1 (<0.1, 0.7)                                                                  | 9.2 (6.3, 12.0)                                                                         | 1388 (142, 12570)                                               |
|             |       | 10                          | 0.1                  | 12                  | 0.95        | 0.947                | 0.864 (0.809, 0.915) | 0.1 (<0.1, 0.7)                                                                  | 5.3 (2.8, 8.0)                                                                          | 1446 (148, 13029)                                               |
|             |       | 10                          | 0.1                  | 15                  | 0.98        | 0.984                | 0.803 (0.721, 0.879) | 0.1 (<0.1, 0.6)                                                                  | 1.6 (0.1, 3.9)                                                                          | 1557 (157, 14185)                                               |
| Albania     | Men   | 10                          | 5.5                  | 14                  | 0.90        | 0.902                | 0.747 (0.690, 0.795) | 4.1 (3.0, 5.3)                                                                   | 9.3 (6.6, 12.5)                                                                         | 25 (19, 33)                                                     |
|             |       | 10                          | 5.5                  | 18                  | 0.95        | 0.954                | 0.647 (0.564, 0.722) | 3.5 (2.6, 4.7)                                                                   | 4.4 (2.0, 7.6)                                                                          | 28 (21, 38)                                                     |
|             |       | 10                          | 5.5                  | 21                  | 0.98        | 0.979                | 0.576 (0.473, 0.671) | 3.1 (2.2, 4.3)                                                                   | 2 (0.2, 5.0)                                                                            | 32 (23, 45)                                                     |
|             | Women | 10                          | 1.4                  | 10                  | 0.90        | 0.908                | 0.901 (0.859, 0.938) | 1.2 (0.7, 2.1)                                                                   | 9.1 (6.2, 11.8)                                                                         | 82 (47, 138)                                                    |
|             |       | 10                          | 1.4                  | 12                  | 0.95        | 0.947                | 0.864 (0.809, 0.915) | 1.2 (0.7, 2.0)                                                                   | 5.2 (2.7, 7.9)                                                                          | 86 (49, 144)                                                    |
|             |       | 10                          | 1.4                  | 15                  | 0.98        | 0.984                | 0.803 (0.721, 0.879) | 1.1 (0.6, 1.9)                                                                   | 1.6 (0.1, 3.8)                                                                          | 92 (52, 155)                                                    |
| Algeria     | Men   | 10                          | 1.4                  | 14                  | 0.90        | 0.902                | 0.747 (0.690, 0.795) | 1.1 (0.6, 1.8)                                                                   | 9.7 (6.9, 13.0)                                                                         | 95 (55, 163)                                                    |
|             |       | 10                          | 1.4                  | 18                  | 0.95        | 0.954                | 0.647 (0.564, 0.722) | 0.9 (0.5, 1.5)                                                                   | 4.6 (2.0, 7.9)                                                                          | 110 (65, 189)                                                   |
|             |       | 10                          | 1.4                  | 21                  | 0.98        | 0.979                | 0.576 (0.473, 0.671) | 0.8 (0.5, 1.4)                                                                   | 2.1 (0.2, 5.2)                                                                          | 123 (72, 218)                                                   |
|             | Women | 10                          | 0.0                  | 10                  | 0.90        | 0.908                | 0.901 (0.859, 0.938) | <0.1 (<0.1, 1.0)                                                                 | 9.2 (6.3, 12.0)                                                                         | 3701 (98, 106231)                                               |

| Country             | Sex   | Standard drink size (grams) | Prevalence (%) of AD | AUDIT cut-off score | Specificity | Specificity (actual) | Sensitivity (95% UI) | People who have AD and a positive AUDIT score [per 100 people screened] (95% UI) | People who do not have AD and a positive AUDIT score [per 100 people screened] (95% UI) | Number of people needed to screen to treat one AD case (95% UI) |
|---------------------|-------|-----------------------------|----------------------|---------------------|-------------|----------------------|----------------------|----------------------------------------------------------------------------------|-----------------------------------------------------------------------------------------|-----------------------------------------------------------------|
| Andorra             | Men   | 10                          | 0.0                  | 12                  | 0.95        | 0.947                | 0.864 (0.809, 0.915) | <0.1 (<0.1, 1.0)                                                                 | 5.3 (2.8, 8.0)                                                                          | 3857 (103, 110950)                                              |
|                     |       | 10                          | 0.0                  | 15                  | 0.98        | 0.984                | 0.803 (0.721, 0.879) | <0.1 (<0.1, 0.9)                                                                 | 1.6 (0.1, 3.9)                                                                          | 4152 (110, 120547)                                              |
|                     |       | 10                          | 5.6                  | 14                  | 0.90        | 0.902                | 0.747 (0.690, 0.795) | 4.1 (3.1, 5.4)                                                                   | 9.3 (6.6, 12.4)                                                                         | 24 (19, 32)                                                     |
|                     |       | 10                          | 5.6                  | 18                  | 0.95        | 0.954                | 0.647 (0.564, 0.722) | 3.6 (2.7, 4.8)                                                                   | 4.4 (1.9, 7.5)                                                                          | 28 (21, 37)                                                     |
|                     | Women | 10                          | 5.6                  | 21                  | 0.98        | 0.979                | 0.576 (0.473, 0.671) | 3.2 (2.3, 4.3)                                                                   | 2 (0.2, 5.0)                                                                            | 31 (23, 44)                                                     |
|                     |       | 10                          | 1.4                  | 10                  | 0.90        | 0.908                | 0.901 (0.859, 0.938) | 1.2 (0.7, 2.1)                                                                   | 9.1 (6.2, 11.8)                                                                         | 82 (47, 135)                                                    |
|                     |       | 10                          | 1.4                  | 12                  | 0.95        | 0.947                | 0.864 (0.809, 0.915) | 1.2 (0.7, 2.1)                                                                   | 5.2 (2.7, 7.9)                                                                          | 85 (49, 142)                                                    |
|                     |       | 10                          | 1.4                  | 15                  | 0.98        | 0.984                | 0.803 (0.721, 0.879) | 1.1 (0.6, 1.9)                                                                   | 1.6 (0.1, 3.8)                                                                          | 92 (53, 156)                                                    |
| Angola              | Men   | 10                          | 3.6                  | 14                  | 0.90        | 0.902                | 0.747 (0.690, 0.795) | 2.7 (2.0, 3.7)                                                                   | 9.5 (6.7, 12.7)                                                                         | 37 (27, 51)                                                     |
|                     |       | 10                          | 3.6                  | 18                  | 0.95        | 0.954                | 0.647 (0.564, 0.722) | 2.3 (1.7, 3.2)                                                                   | 4.5 (2.0, 7.7)                                                                          | 43 (31, 59)                                                     |
|                     |       | 10                          | 3.6                  | 21                  | 0.98        | 0.979                | 0.576 (0.473, 0.671) | 2.1 (1.5, 2.9)                                                                   | 2 (0.2, 5.1)                                                                            | 48 (34, 69)                                                     |
|                     |       | 10                          | 0.7                  | 10                  | 0.90        | 0.908                | 0.901 (0.859, 0.938) | 0.6 (0.3, 1.2)                                                                   | 9.2 (6.3, 11.9)                                                                         | 169 (81, 362)                                                   |
|                     | Women | 10                          | 0.7                  | 12                  | 0.95        | 0.947                | 0.864 (0.809, 0.915) | 0.6 (0.3, 1.2)                                                                   | 5.3 (2.7, 7.9)                                                                          | 176 (84, 378)                                                   |
|                     |       | 10                          | 0.7                  | 15                  | 0.98        | 0.984                | 0.803 (0.721, 0.879) | 0.5 (0.2, 1.1)                                                                   | 1.6 (0.1, 3.8)                                                                          | 189 (90, 409)                                                   |
|                     |       | 10                          | 3.8                  | 14                  | 0.90        | 0.902                | 0.747 (0.690, 0.795) | 2.9 (2.1, 3.9)                                                                   | 9.5 (6.7, 12.6)                                                                         | 35 (25, 49)                                                     |
|                     |       | 10                          | 3.8                  | 18                  | 0.95        | 0.954                | 0.647 (0.564, 0.722) | 2.5 (1.7, 3.4)                                                                   | 4.4 (2.0, 7.6)                                                                          | 40 (29, 57)                                                     |
| Antigua and Barbuda | Men   |                             |                      |                     |             |                      |                      |                                                                                  |                                                                                         |                                                                 |

| Country   | Sex   | Standard drink size (grams) | Prevalence (%) of AD | AUDIT cut-off score | Specificity | Specificity (actual) | Sensitivity (95% UI) | People who have AD and a positive AUDIT score [per 100 people screened] (95% UI) | People who do not have AD and a positive AUDIT score [per 100 people screened] (95% UI) | Number of people needed to screen to treat one AD case (95% UI) |
|-----------|-------|-----------------------------|----------------------|---------------------|-------------|----------------------|----------------------|----------------------------------------------------------------------------------|-----------------------------------------------------------------------------------------|-----------------------------------------------------------------|
| Argentina | Women | 10                          | 3.8                  | 21                  | 0.98        | 0.979                | 0.576 (0.473, 0.671) | 2.2 (1.5, 3.1)                                                                   | 2 (0.2, 5.1)                                                                            | 45 (32, 66)                                                     |
|           |       | 10                          | 1.8                  | 10                  | 0.90        | 0.908                | 0.901 (0.859, 0.938) | 1.6 (1.0, 2.5)                                                                   | 9.1 (6.2, 11.8)                                                                         | 62 (40, 98)                                                     |
|           |       | 10                          | 1.8                  | 12                  | 0.95        | 0.947                | 0.864 (0.809, 0.915) | 1.5 (1.0, 2.4)                                                                   | 5.2 (2.7, 7.9)                                                                          | 65 (41, 102)                                                    |
|           |       | 10                          | 1.8                  | 15                  | 0.98        | 0.984                | 0.803 (0.721, 0.879) | 1.4 (0.9, 2.3)                                                                   | 1.6 (0.1, 3.8)                                                                          | 70 (44, 111)                                                    |
|           |       | 10                          | 4.8                  | 14                  | 0.90        | 0.902                | 0.747 (0.690, 0.795) | 3.6 (2.7, 4.7)                                                                   | 9.4 (6.7, 12.6)                                                                         | 28 (21, 37)                                                     |
|           | Men   | 10                          | 4.8                  | 18                  | 0.95        | 0.954                | 0.647 (0.564, 0.722) | 3.1 (2.3, 4.1)                                                                   | 4.4 (2.0, 7.6)                                                                          | 32 (24, 44)                                                     |
|           |       | 10                          | 4.8                  | 21                  | 0.98        | 0.979                | 0.576 (0.473, 0.671) | 2.8 (2.0, 3.7)                                                                   | 2 (0.2, 5.1)                                                                            | 36 (27, 50)                                                     |
|           |       | 10                          | 1.2                  | 10                  | 0.90        | 0.908                | 0.901 (0.859, 0.938) | 1.1 (0.6, 1.9)                                                                   | 9.1 (6.2, 11.9)                                                                         | 92 (54, 162)                                                    |
|           |       | 10                          | 1.2                  | 12                  | 0.95        | 0.947                | 0.864 (0.809, 0.915) | 1 (0.6, 1.8)                                                                     | 5.2 (2.7, 7.9)                                                                          | 96 (56, 168)                                                    |
|           |       | 10                          | 1.2                  | 15                  | 0.98        | 0.984                | 0.803 (0.721, 0.879) | 1 (0.5, 1.7)                                                                     | 1.6 (0.1, 3.8)                                                                          | 103 (60, 183)                                                   |
| Armenia   | Men   | 10                          | 5.5                  | 14                  | 0.90        | 0.902                | 0.747 (0.690, 0.795) | 4.1 (3.1, 5.2)                                                                   | 9.3 (6.7, 12.4)                                                                         | 25 (19, 32)                                                     |
|           |       | 10                          | 5.5                  | 18                  | 0.95        | 0.954                | 0.647 (0.564, 0.722) | 3.5 (2.6, 4.6)                                                                   | 4.4 (1.9, 7.6)                                                                          | 28 (22, 39)                                                     |
|           |       | 10                          | 5.5                  | 21                  | 0.98        | 0.979                | 0.576 (0.473, 0.671) | 3.1 (2.2, 4.2)                                                                   | 2 (0.2, 5.0)                                                                            | 32 (24, 45)                                                     |
|           | Women | 10                          | 1.4                  | 10                  | 0.90        | 0.908                | 0.901 (0.859, 0.938) | 1.2 (0.7, 2.2)                                                                   | 9.1 (6.2, 11.9)                                                                         | 82 (45, 142)                                                    |
|           |       | 10                          | 1.4                  | 12                  | 0.95        | 0.947                | 0.864 (0.809, 0.915) | 1.2 (0.7, 2.1)                                                                   | 5.2 (2.7, 7.9)                                                                          | 85 (47, 147)                                                    |
|           |       | 10                          | 1.4                  | 15                  | 0.98        | 0.984                | 0.803 (0.721, 0.879) | 1.1 (0.6, 2.0)                                                                   | 1.6 (0.1, 3.8)                                                                          | 92 (51, 157)                                                    |

| Country    | Sex   | Standard drink size (grams) | Prevalence (%) of AD | AUDIT cut-off score | Specificity | Specificity (actual) | Sensitivity (95% UI) | People who have AD and a positive AUDIT score [per 100 people screened] (95% UI) | People who do not have AD and a positive AUDIT score [per 100 people screened] (95% UI) | Number of people needed to screen to treat one AD case (95% UI) |
|------------|-------|-----------------------------|----------------------|---------------------|-------------|----------------------|----------------------|----------------------------------------------------------------------------------|-----------------------------------------------------------------------------------------|-----------------------------------------------------------------|
| Australia  | Men   | 10                          | 2.2                  | 14                  | 0.90        | 0.902                | 0.747 (0.690, 0.795) | 1.7 (1.1, 2.5)                                                                   | 9.6 (6.8, 12.9)                                                                         | 60 (40, 90)                                                     |
|            |       | 10                          | 2.2                  | 18                  | 0.95        | 0.954                | 0.647 (0.564, 0.722) | 1.4 (0.9, 2.2)                                                                   | 4.5 (2.0, 7.8)                                                                          | 70 (45, 106)                                                    |
|            |       | 10                          | 2.2                  | 21                  | 0.98        | 0.979                | 0.576 (0.473, 0.671) | 1.3 (0.8, 2.0)                                                                   | 2.1 (0.2, 5.2)                                                                          | 78 (50, 120)                                                    |
|            | Women | 10                          | 0.8                  | 10                  | 0.90        | 0.908                | 0.901 (0.859, 0.938) | 0.7 (0.3, 1.4)                                                                   | 9.2 (6.3, 11.9)                                                                         | 142 (73, 288)                                                   |
|            |       | 10                          | 0.8                  | 12                  | 0.95        | 0.947                | 0.864 (0.809, 0.915) | 0.7 (0.3, 1.3)                                                                   | 5.3 (2.7, 8.0)                                                                          | 148 (76, 300)                                                   |
|            |       | 10                          | 0.8                  | 15                  | 0.98        | 0.984                | 0.803 (0.721, 0.879) | 0.6 (0.3, 1.2)                                                                   | 1.6 (0.1, 3.9)                                                                          | 160 (82, 324)                                                   |
| Austria    | Men   | 20                          | 8.8                  | 14                  | 0.90        | 0.896                | 0.731 (0.531, 0.880) | 6.4 (4.5, 8.2)                                                                   | 9.5 (2.6, 19.9)                                                                         | 16 (12, 22)                                                     |
|            |       | 20                          | 8.8                  | 18                  | 0.95        | 0.95                 | 0.631 (0.419, 0.802) | 5.5 (3.6, 7.4)                                                                   | 4.6 (0.2, 13.1)                                                                         | 18 (13, 28)                                                     |
|            |       | 20                          | 8.8                  | 22                  | 0.98        | 0.982                | 0.535 (0.319, 0.732) | 4.7 (2.7, 6.6)                                                                   | 1.6 (<0.1, 8.1)                                                                         | 21 (15, 37)                                                     |
|            | Women | 20                          | 3.0                  | 3                   | 0.90        | 0.915                | 0.333 (0.091, 0.607) | 1 (0.3, 2.0)                                                                     | 8.2 (0.8, 24.7)                                                                         | 100 (51, 367)                                                   |
|            |       | 20                          | 3.0                  | 4                   | 0.95        | 0.949                | 0.308 (0.079, 0.581) | 0.9 (0.2, 1.9)                                                                   | 4.9 (<0.1, 18.6)                                                                        | 108 (54, 425)                                                   |
|            |       | 20                          | 3.0                  | 5                   | 0.98        | 0.972                | 0.284 (0.066, 0.549) | 0.9 (0.2, 1.8)                                                                   | 2.7 (<0.1, 14.1)                                                                        | 118 (57, 479)                                                   |
| Azerbaijan | Men   | 10                          | 5.5                  | 14                  | 0.90        | 0.902                | 0.747 (0.690, 0.795) | 4.1 (3.1, 5.3)                                                                   | 9.3 (6.7, 12.4)                                                                         | 25 (19, 32)                                                     |
|            |       | 10                          | 5.5                  | 18                  | 0.95        | 0.954                | 0.647 (0.564, 0.722) | 3.5 (2.6, 4.7)                                                                   | 4.4 (1.9, 7.6)                                                                          | 28 (21, 38)                                                     |
|            |       | 10                          | 5.5                  | 21                  | 0.98        | 0.979                | 0.576 (0.473, 0.671) | 3.1 (2.3, 4.2)                                                                   | 2 (0.2, 5.0)                                                                            | 32 (24, 43)                                                     |
|            | Women | 10                          | 1.4                  | 10                  | 0.90        | 0.908                | 0.901 (0.859, 0.938) | 1.2 (0.7, 2.1)                                                                   | 9.1 (6.2, 11.8)                                                                         | 82 (48, 134)                                                    |

| Country    | Sex   | Standard drink size (grams) | Prevalence (%) of AD | AUDIT cut-off score | Specificity | Specificity (actual) | Sensitivity (95% UI) | People who have AD and a positive AUDIT score [per 100 people screened] (95% UI) | People who do not have AD and a positive AUDIT score [per 100 people screened] (95% UI) | Number of people needed to screen to treat one AD case (95% UI) |
|------------|-------|-----------------------------|----------------------|---------------------|-------------|----------------------|----------------------|----------------------------------------------------------------------------------|-----------------------------------------------------------------------------------------|-----------------------------------------------------------------|
| Bahamas    | Men   | 10                          | 1.4                  | 12                  | 0.95        | 0.947                | 0.864 (0.809, 0.915) | 1.2 (0.7, 2.0)                                                                   | 5.2 (2.7, 7.9)                                                                          | 85 (50, 140)                                                    |
|            |       | 10                          | 1.4                  | 15                  | 0.98        | 0.984                | 0.803 (0.721, 0.879) | 1.1 (0.7, 1.9)                                                                   | 1.6 (0.1, 3.8)                                                                          | 92 (54, 153)                                                    |
|            |       | 10                          | 3.9                  | 14                  | 0.90        | 0.902                | 0.747 (0.690, 0.795) | 2.9 (2.1, 4.0)                                                                   | 9.4 (6.7, 12.7)                                                                         | 35 (25, 47)                                                     |
|            |       | 10                          | 3.9                  | 18                  | 0.95        | 0.954                | 0.647 (0.564, 0.722) | 2.5 (1.8, 3.5)                                                                   | 4.4 (2.0, 7.7)                                                                          | 40 (29, 56)                                                     |
|            | Women | 10                          | 3.9                  | 21                  | 0.98        | 0.979                | 0.576 (0.473, 0.671) | 2.2 (1.5, 3.1)                                                                   | 2 (0.2, 5.1)                                                                            | 45 (32, 65)                                                     |
|            |       | 10                          | 1.8                  | 10                  | 0.90        | 0.908                | 0.901 (0.859, 0.938) | 1.6 (1.0, 2.6)                                                                   | 9.1 (6.2, 11.8)                                                                         | 62 (39, 97)                                                     |
|            |       | 10                          | 1.8                  | 12                  | 0.95        | 0.947                | 0.864 (0.809, 0.915) | 1.6 (1.0, 2.5)                                                                   | 5.2 (2.7, 7.9)                                                                          | 64 (41, 101)                                                    |
|            |       | 10                          | 1.8                  | 15                  | 0.98        | 0.984                | 0.803 (0.721, 0.879) | 1.4 (0.9, 2.3)                                                                   | 1.6 (0.1, 3.8)                                                                          | 69 (44, 108)                                                    |
| Bahrain    | Men   | 10                          | 0.4                  | 14                  | 0.90        | 0.902                | 0.747 (0.690, 0.795) | 0.3 (0.1, 0.7)                                                                   | 9.8 (7.0, 13.1)                                                                         | 383 (140, 1083)                                                 |
|            |       | 10                          | 0.4                  | 18                  | 0.95        | 0.954                | 0.647 (0.564, 0.722) | 0.2 (0.1, 0.6)                                                                   | 4.6 (2.0, 8.0)                                                                          | 441 (159, 1252)                                                 |
|            |       | 10                          | 0.4                  | 21                  | 0.98        | 0.979                | 0.576 (0.473, 0.671) | 0.2 (0.1, 0.6)                                                                   | 2.1 (0.2, 5.3)                                                                          | 496 (177, 1414)                                                 |
|            | Women | 10                          | 0.1                  | 10                  | 0.90        | 0.908                | 0.901 (0.859, 0.938) | 0.1 (<0.1, 0.7)                                                                  | 9.2 (6.3, 12.0)                                                                         | 1388 (136, 15238)                                               |
|            |       | 10                          | 0.1                  | 12                  | 0.95        | 0.947                | 0.864 (0.809, 0.915) | 0.1 (<0.1, 0.7)                                                                  | 5.3 (2.8, 8.0)                                                                          | 1446 (138, 16089)                                               |
|            |       | 10                          | 0.1                  | 15                  | 0.98        | 0.984                | 0.803 (0.721, 0.879) | 0.1 (<0.1, 0.7)                                                                  | 1.6 (0.1, 3.9)                                                                          | 1557 (146, 17270)                                               |
| Bangladesh | Men   | 10                          | 1.2                  | 14                  | 0.90        | 0.902                | 0.747 (0.690, 0.795) | 0.9 (0.5, 1.5)                                                                   | 9.7 (7.0, 13.0)                                                                         | 114 (68, 208)                                                   |
|            |       | 10                          | 1.2                  | 18                  | 0.95        | 0.954                | 0.647 (0.564, 0.722) | 0.8 (0.4, 1.3)                                                                   | 4.6 (2.0, 7.9)                                                                          | 132 (77, 246)                                                   |



| Country  | Sex   | Standard drink size (grams) | Prevalence (%) of AD | AUDIT cut-off score | Specificity | Specificity (actual) | Sensitivity (95% UI) | People who have AD and a positive AUDIT score [per 100 people screened] (95% UI) | People who do not have AD and a positive AUDIT score [per 100 people screened] (95% UI) | Number of people needed to screen to treat one AD case (95% UI) |
|----------|-------|-----------------------------|----------------------|---------------------|-------------|----------------------|----------------------|----------------------------------------------------------------------------------|-----------------------------------------------------------------------------------------|-----------------------------------------------------------------|
| Barbados | Women | 10                          | 1.2                  | 21                  | 0.98        | 0.979                | 0.576 (0.473, 0.671) | 0.7 (0.3, 1.2)                                                                   | 2.1 (0.2, 5.2)                                                                          | 148 (86, 287)                                                   |
|          |       | 10                          | 0.2                  | 10                  | 0.90        | 0.908                | 0.901 (0.859, 0.938) | 0.2 (0.1, 0.8)                                                                   | 9.2 (6.3, 12.0)                                                                         | 492 (131, 1920)                                                 |
|          |       | 10                          | 0.2                  | 12                  | 0.95        | 0.947                | 0.864 (0.809, 0.915) | 0.2 (<0.1, 0.7)                                                                  | 5.3 (2.8, 8.0)                                                                          | 513 (136, 1987)                                                 |
|          |       | 10                          | 0.2                  | 15                  | 0.98        | 0.984                | 0.803 (0.721, 0.879) | 0.2 (<0.1, 0.7)                                                                  | 1.6 (0.1, 3.9)                                                                          | 552 (145, 2157)                                                 |
|          |       | 10                          | 3.8                  | 14                  | 0.90        | 0.902                | 0.747 (0.690, 0.795) | 2.8 (2.0, 3.9)                                                                   | 9.5 (6.8, 12.6)                                                                         | 35 (26, 49)                                                     |
|          | Men   | 10                          | 3.8                  | 18                  | 0.95        | 0.954                | 0.647 (0.564, 0.722) | 2.5 (1.7, 3.5)                                                                   | 4.5 (2.0, 7.7)                                                                          | 41 (29, 57)                                                     |
|          |       | 10                          | 3.8                  | 21                  | 0.98        | 0.979                | 0.576 (0.473, 0.671) | 2.2 (1.5, 3.1)                                                                   | 2 (0.2, 5.1)                                                                            | 46 (32, 66)                                                     |
|          |       | 10                          | 1.7                  | 10                  | 0.90        | 0.908                | 0.901 (0.859, 0.938) | 1.6 (1.0, 2.5)                                                                   | 9.1 (6.2, 11.8)                                                                         | 64 (41, 100)                                                    |
|          |       | 10                          | 1.7                  | 12                  | 0.95        | 0.947                | 0.864 (0.809, 0.915) | 1.5 (1.0, 2.4)                                                                   | 5.2 (2.7, 7.9)                                                                          | 66 (42, 105)                                                    |
|          |       | 10                          | 1.7                  | 15                  | 0.98        | 0.984                | 0.803 (0.721, 0.879) | 1.4 (0.9, 2.2)                                                                   | 1.6 (0.1, 3.8)                                                                          | 72 (46, 116)                                                    |
| Belarus  | Men   | 10                          | 19.6                 | 14                  | 0.90        | 0.902                | 0.747 (0.690, 0.795) | 14.7 (12.7, 16.8)                                                                | 7.9 (5.7, 10.6)                                                                         | 7 (6, 8)                                                        |
|          |       | 10                          | 19.6                 | 18                  | 0.95        | 0.954                | 0.647 (0.564, 0.722) | 12.7 (10.7, 15.0)                                                                | 3.7 (1.6, 6.5)                                                                          | 8 (7, 9)                                                        |
|          |       | 10                          | 19.6                 | 21                  | 0.98        | 0.979                | 0.576 (0.473, 0.671) | 11.3 (9.0, 13.8)                                                                 | 1.7 (0.2, 4.2)                                                                          | 9 (7, 11)                                                       |
|          | Women | 10                          | 3.8                  | 10                  | 0.90        | 0.908                | 0.901 (0.859, 0.938) | 3.4 (2.5, 4.7)                                                                   | 8.9 (6.0, 11.6)                                                                         | 29 (21, 39)                                                     |
|          |       | 10                          | 3.8                  | 12                  | 0.95        | 0.947                | 0.864 (0.809, 0.915) | 3.3 (2.4, 4.5)                                                                   | 5.1 (2.6, 7.7)                                                                          | 31 (22, 41)                                                     |
|          |       | 10                          | 3.8                  | 15                  | 0.98        | 0.984                | 0.803 (0.721, 0.879) | 3 (2.2, 4.3)                                                                     | 1.5 (0.1, 3.7)                                                                          | 33 (23, 45)                                                     |

| Country | Sex   | Standard drink size (grams) | Prevalence (%) of AD | AUDIT cut-off score | Specificity | Specificity (actual) | Sensitivity (95% UI) | People who have AD and a positive AUDIT score [per 100 people screened] (95% UI) | People who do not have AD and a positive AUDIT score [per 100 people screened] (95% UI) | Number of people needed to screen to treat one AD case (95% UI) |
|---------|-------|-----------------------------|----------------------|---------------------|-------------|----------------------|----------------------|----------------------------------------------------------------------------------|-----------------------------------------------------------------------------------------|-----------------------------------------------------------------|
| Belgium | Men   | 10                          | 6.3                  | 14                  | 0.90        | 0.902                | 0.747 (0.690, 0.795) | 4.7 (3.6, 6.1)                                                                   | 9.2 (6.5, 12.3)                                                                         | 21 (17, 28)                                                     |
|         |       | 10                          | 6.3                  | 18                  | 0.95        | 0.954                | 0.647 (0.564, 0.722) | 4.1 (3.1, 5.3)                                                                   | 4.3 (1.9, 7.5)                                                                          | 25 (19, 32)                                                     |
|         |       | 10                          | 6.3                  | 21                  | 0.98        | 0.979                | 0.576 (0.473, 0.671) | 3.6 (2.6, 4.9)                                                                   | 2 (0.2, 4.9)                                                                            | 28 (20, 38)                                                     |
|         | Women | 10                          | 2.3                  | 10                  | 0.90        | 0.908                | 0.901 (0.859, 0.938) | 2.1 (1.4, 3.0)                                                                   | 9 (6.2, 11.7)                                                                           | 48 (33, 70)                                                     |
|         |       | 10                          | 2.3                  | 12                  | 0.95        | 0.947                | 0.864 (0.809, 0.915) | 2 (1.3, 2.9)                                                                     | 5.2 (2.7, 7.8)                                                                          | 50 (34, 74)                                                     |
|         |       | 10                          | 2.3                  | 15                  | 0.98        | 0.984                | 0.803 (0.721, 0.879) | 1.8 (1.2, 2.7)                                                                   | 1.5 (0.1, 3.8)                                                                          | 54 (37, 81)                                                     |
| Belize  | Men   | 10                          | 5.2                  | 14                  | 0.90        | 0.902                | 0.747 (0.690, 0.795) | 3.9 (2.9, 5.1)                                                                   | 9.3 (6.7, 12.5)                                                                         | 26 (20, 34)                                                     |
|         |       | 10                          | 5.2                  | 18                  | 0.95        | 0.954                | 0.647 (0.564, 0.722) | 3.3 (2.4, 4.5)                                                                   | 4.4 (1.9, 7.5)                                                                          | 30 (22, 41)                                                     |
|         |       | 10                          | 5.2                  | 21                  | 0.98        | 0.979                | 0.576 (0.473, 0.671) | 3 (2.1, 4.1)                                                                     | 2 (0.2, 5.0)                                                                            | 34 (24, 48)                                                     |
|         | Women | 10                          | 1.0                  | 10                  | 0.90        | 0.908                | 0.901 (0.859, 0.938) | 0.9 (0.5, 1.7)                                                                   | 9.2 (6.2, 11.9)                                                                         | 112 (60, 206)                                                   |
|         |       | 10                          | 1.0                  | 12                  | 0.95        | 0.947                | 0.864 (0.809, 0.915) | 0.9 (0.5, 1.6)                                                                   | 5.3 (2.7, 7.9)                                                                          | 117 (63, 216)                                                   |
|         |       | 10                          | 1.0                  | 15                  | 0.98        | 0.984                | 0.803 (0.721, 0.879) | 0.8 (0.4, 1.5)                                                                   | 1.6 (0.1, 3.8)                                                                          | 126 (67, 234)                                                   |
| Benin   | Men   | 10                          | 3.7                  | 14                  | 0.90        | 0.902                | 0.747 (0.690, 0.795) | 2.7 (2.0, 3.8)                                                                   | 9.5 (6.8, 12.7)                                                                         | 36 (26, 51)                                                     |
|         |       | 10                          | 3.7                  | 18                  | 0.95        | 0.954                | 0.647 (0.564, 0.722) | 2.4 (1.7, 3.3)                                                                   | 4.5 (2.0, 7.7)                                                                          | 42 (30, 60)                                                     |
|         |       | 10                          | 3.7                  | 21                  | 0.98        | 0.979                | 0.576 (0.473, 0.671) | 2.1 (1.4, 3.0)                                                                   | 2 (0.2, 5.1)                                                                            | 47 (34, 71)                                                     |
|         | Women | 10                          | 0.8                  | 10                  | 0.90        | 0.908                | 0.901 (0.859, 0.938) | 0.8 (0.4, 1.5)                                                                   | 9.2 (6.3, 11.9)                                                                         | 133 (68, 273)                                                   |

| Country                          | Sex   | Standard drink size (grams) | Prevalence (%) of AD | AUDIT cut-off score | Specificity | Specificity (actual) | Sensitivity (95% UI) | People who have AD and a positive AUDIT score [per 100 people screened] (95% UI) | People who do not have AD and a positive AUDIT score [per 100 people screened] (95% UI) | Number of people needed to screen to treat one AD case (95% UI) |
|----------------------------------|-------|-----------------------------|----------------------|---------------------|-------------|----------------------|----------------------|----------------------------------------------------------------------------------|-----------------------------------------------------------------------------------------|-----------------------------------------------------------------|
| Bhutan                           | Men   | 10                          | 0.8                  | 12                  | 0.95        | 0.947                | 0.864 (0.809, 0.915) | 0.7 (0.4, 1.4)                                                                   | 5.3 (2.7, 7.9)                                                                          | 138 (71, 286)                                                   |
|                                  |       | 10                          | 0.8                  | 15                  | 0.98        | 0.984                | 0.803 (0.721, 0.879) | 0.7 (0.3, 1.3)                                                                   | 1.6 (0.1, 3.8)                                                                          | 149 (76, 299)                                                   |
|                                  |       | 10                          | 1.3                  | 14                  | 0.90        | 0.902                | 0.747 (0.690, 0.795) | 1 (0.6, 1.6)                                                                     | 9.7 (7.0, 13.0)                                                                         | 105 (64, 178)                                                   |
|                                  |       | 10                          | 1.3                  | 18                  | 0.95        | 0.954                | 0.647 (0.564, 0.722) | 0.8 (0.5, 1.4)                                                                   | 4.6 (2.0, 7.9)                                                                          | 121 (73, 211)                                                   |
|                                  | Women | 10                          | 1.3                  | 21                  | 0.98        | 0.979                | 0.576 (0.473, 0.671) | 0.7 (0.4, 1.2)                                                                   | 2.1 (0.2, 5.2)                                                                          | 136 (81, 243)                                                   |
|                                  |       | 10                          | 0.2                  | 10                  | 0.90        | 0.908                | 0.901 (0.859, 0.938) | 0.2 (0.1, 0.8)                                                                   | 9.2 (6.3, 12.0)                                                                         | 465 (126, 1792)                                                 |
|                                  |       | 10                          | 0.2                  | 12                  | 0.95        | 0.947                | 0.864 (0.809, 0.915) | 0.2 (0.1, 0.8)                                                                   | 5.3 (2.8, 8.0)                                                                          | 484 (131, 1897)                                                 |
|                                  |       | 10                          | 0.2                  | 15                  | 0.98        | 0.984                | 0.803 (0.721, 0.879) | 0.2 (<0.1, 0.7)                                                                  | 1.6 (0.1, 3.9)                                                                          | 521 (142, 2038)                                                 |
| Bolivia (Plurinational State of) | Men   | 10                          | 3.9                  | 14                  | 0.90        | 0.902                | 0.747 (0.690, 0.795) | 2.9 (2.1, 4.0)                                                                   | 9.4 (6.7, 12.7)                                                                         | 34 (25, 48)                                                     |
|                                  |       | 10                          | 3.9                  | 18                  | 0.95        | 0.954                | 0.647 (0.564, 0.722) | 2.5 (1.8, 3.5)                                                                   | 4.4 (2.0, 7.7)                                                                          | 40 (29, 55)                                                     |
|                                  |       | 10                          | 3.9                  | 21                  | 0.98        | 0.979                | 0.576 (0.473, 0.671) | 2.3 (1.6, 3.2)                                                                   | 2 (0.2, 5.1)                                                                            | 44 (32, 63)                                                     |
|                                  | Women | 10                          | 1.8                  | 10                  | 0.90        | 0.908                | 0.901 (0.859, 0.938) | 1.6 (1.0, 2.6)                                                                   | 9.1 (6.2, 11.8)                                                                         | 61 (38, 96)                                                     |
|                                  |       | 10                          | 1.8                  | 12                  | 0.95        | 0.947                | 0.864 (0.809, 0.915) | 1.6 (1.0, 2.5)                                                                   | 5.2 (2.7, 7.8)                                                                          | 64 (40, 100)                                                    |
|                                  |       | 10                          | 1.8                  | 15                  | 0.98        | 0.984                | 0.803 (0.721, 0.879) | 1.5 (0.9, 2.3)                                                                   | 1.6 (0.1, 3.8)                                                                          | 68 (43, 108)                                                    |
| Bosnia and Herzegovina           | Men   | 10                          | 5.5                  | 14                  | 0.90        | 0.902                | 0.747 (0.690, 0.795) | 4.1 (3.2, 5.4)                                                                   | 9.3 (6.6, 12.3)                                                                         | 24 (19, 31)                                                     |
|                                  |       | 10                          | 5.5                  | 18                  | 0.95        | 0.954                | 0.647 (0.564, 0.722) | 3.6 (2.7, 4.7)                                                                   | 4.4 (1.9, 7.5)                                                                          | 28 (21, 37)                                                     |

| Country  | Sex   | Standard drink size (grams) | Prevalence (%) of AD | AUDIT cut-off score | Specificity | Specificity (actual) | Sensitivity (95% UI) | People who have AD and a positive AUDIT score [per 100 people screened] (95% UI) | People who do not have AD and a positive AUDIT score [per 100 people screened] (95% UI) | Number of people needed to screen to treat one AD case (95% UI) |               |
|----------|-------|-----------------------------|----------------------|---------------------|-------------|----------------------|----------------------|----------------------------------------------------------------------------------|-----------------------------------------------------------------------------------------|-----------------------------------------------------------------|---------------|
| Botswana | Women | 10                          | 5.5                  | 21                  | 0.98        | 0.979                | 0.576 (0.473, 0.671) | 3.2 (2.3, 4.3)                                                                   | 2 (0.2, 5.0)                                                                            | 31 (23, 43)                                                     |               |
|          |       | 10                          | 1.4                  | 10                  | 0.90        | 0.908                | 0.901 (0.859, 0.938) | 1.2 (0.7, 2.1)                                                                   | 9.1 (6.2, 11.9)                                                                         | 82 (49, 142)                                                    |               |
|          |       | 10                          | 1.4                  | 12                  | 0.95        | 0.947                | 0.864 (0.809, 0.915) | 1.2 (0.7, 2.0)                                                                   | 5.2 (2.7, 7.9)                                                                          | 85 (50, 148)                                                    |               |
|          |       | 10                          | 1.4                  | 15                  | 0.98        | 0.984                | 0.803 (0.721, 0.879) | 1.1 (0.6, 1.9)                                                                   | 1.6 (0.1, 3.8)                                                                          | 92 (54, 159)                                                    |               |
|          |       | 10                          | 4.2                  | 14                  | 0.90        | 0.902                | 0.747 (0.690, 0.795) | 3.2 (2.3, 4.2)                                                                   | 9.4 (6.8, 12.6)                                                                         | 32 (24, 43)                                                     |               |
|          | Men   | 10                          | 4.2                  | 18                  | 0.95        | 0.954                | 0.647 (0.564, 0.722) | 2.7 (2.0, 3.7)                                                                   | 4.4 (2.0, 7.7)                                                                          | 36 (27, 50)                                                     |               |
|          |       | 10                          | 4.2                  | 21                  | 0.98        | 0.979                | 0.576 (0.473, 0.671) | 2.4 (1.7, 3.4)                                                                   | 2 (0.2, 5.1)                                                                            | 41 (30, 59)                                                     |               |
|          |       | Women                       | 10                   | 0.7                 | 10          | 0.90                 | 0.908                | 0.901 (0.859, 0.938)                                                             | 0.7 (0.3, 1.4)                                                                          | 9.2 (6.3, 11.9)                                                 | 150 (73, 319) |
|          |       |                             | 10                   | 0.7                 | 12          | 0.95                 | 0.947                | 0.864 (0.809, 0.915)                                                             | 0.6 (0.3, 1.3)                                                                          | 5.3 (2.7, 8.0)                                                  | 156 (76, 334) |
|          |       |                             | 10                   | 0.7                 | 15          | 0.98                 | 0.984                | 0.803 (0.721, 0.879)                                                             | 0.6 (0.3, 1.2)                                                                          | 1.6 (0.1, 3.8)                                                  | 168 (80, 363) |
| Brazil   | Men   | 10                          | 2.3                  | 14                  | 0.90        | 0.902                | 0.747 (0.690, 0.795) | 1.7 (1.2, 2.5)                                                                   | 9.6 (6.9, 12.8)                                                                         | 58 (39, 87)                                                     |               |
|          |       | 10                          | 2.3                  | 18                  | 0.95        | 0.954                | 0.647 (0.564, 0.722) | 1.5 (1.0, 2.2)                                                                   | 4.5 (2.0, 7.8)                                                                          | 67 (45, 100)                                                    |               |
|          |       | 10                          | 2.3                  | 21                  | 0.98        | 0.979                | 0.576 (0.473, 0.671) | 1.3 (0.9, 2.0)                                                                   | 2.1 (0.2, 5.2)                                                                          | 75 (51, 114)                                                    |               |
|          | Women | 10                          | 0.5                  | 10                  | 0.90        | 0.908                | 0.901 (0.859, 0.938) | 0.4 (0.2, 1.1)                                                                   | 9.2 (6.3, 12.0)                                                                         | 222 (94, 562)                                                   |               |
|          |       | 10                          | 0.5                  | 12                  | 0.95        | 0.947                | 0.864 (0.809, 0.915) | 0.4 (0.2, 1.0)                                                                   | 5.3 (2.8, 8.0)                                                                          | 231 (96, 587)                                                   |               |
|          |       | 10                          | 0.5                  | 15                  | 0.98        | 0.984                | 0.803 (0.721, 0.879) | 0.4 (0.2, 1.0)                                                                   | 1.6 (0.1, 3.8)                                                                          | 249 (104, 637)                                                  |               |

| Country           | Sex   | Standard drink size (grams) | Prevalence (%) of AD | AUDIT cut-off score | Specificity | Specificity (actual) | Sensitivity (95% UI) | People who have AD and a positive AUDIT score [per 100 people screened] (95% UI) | People who do not have AD and a positive AUDIT score [per 100 people screened] (95% UI) | Number of people needed to screen to treat one AD case (95% UI) |
|-------------------|-------|-----------------------------|----------------------|---------------------|-------------|----------------------|----------------------|----------------------------------------------------------------------------------|-----------------------------------------------------------------------------------------|-----------------------------------------------------------------|
| Brunei Darussalam | Men   | 10                          | 1.4                  | 14                  | 0.90        | 0.902                | 0.747 (0.690, 0.795) | 1 (0.6, 1.8)                                                                     | 9.7 (6.9, 12.9)                                                                         | 99 (56, 168)                                                    |
|                   |       | 10                          | 1.4                  | 18                  | 0.95        | 0.954                | 0.647 (0.564, 0.722) | 0.9 (0.5, 1.5)                                                                   | 4.6 (2.0, 7.9)                                                                          | 114 (65, 197)                                                   |
|                   |       | 10                          | 1.4                  | 21                  | 0.98        | 0.979                | 0.576 (0.473, 0.671) | 0.8 (0.4, 1.4)                                                                   | 2.1 (0.2, 5.2)                                                                          | 128 (73, 227)                                                   |
|                   | Women | 10                          | 0.3                  | 10                  | 0.90        | 0.908                | 0.901 (0.859, 0.938) | 0.2 (0.1, 0.8)                                                                   | 9.2 (6.3, 12.0)                                                                         | 434 (121, 1574)                                                 |
|                   |       | 10                          | 0.3                  | 12                  | 0.95        | 0.947                | 0.864 (0.809, 0.915) | 0.2 (0.1, 0.8)                                                                   | 5.3 (2.8, 8.0)                                                                          | 452 (124, 1675)                                                 |
|                   |       | 10                          | 0.3                  | 15                  | 0.98        | 0.984                | 0.803 (0.721, 0.879) | 0.2 (0.1, 0.8)                                                                   | 1.6 (0.1, 3.9)                                                                          | 487 (133, 1835)                                                 |
| Bulgaria          | Men   | 13                          | 4.3                  | 14                  | 0.90        | 0.9                  | 0.742 (0.684, 0.791) | 3.2 (2.4, 4.3)                                                                   | 9.6 (7.1, 12.7)                                                                         | 31 (23, 42)                                                     |
|                   |       | 13                          | 4.3                  | 18                  | 0.95        | 0.953                | 0.642 (0.560, 0.712) | 2.8 (2.0, 3.8)                                                                   | 4.5 (2.2, 7.7)                                                                          | 36 (27, 50)                                                     |
|                   |       | 13                          | 4.3                  | 21                  | 0.98        | 0.978                | 0.571 (0.472, 0.660) | 2.5 (1.7, 3.4)                                                                   | 2.1 (0.4, 5.1)                                                                          | 41 (30, 57)                                                     |
|                   | Women | 13                          | 0.4                  | 7                   | 0.90        | 0.897                | 0.778 (0.710, 0.840) | 0.3 (0.1, 0.8)                                                                   | 10.3 (7.4, 13.8)                                                                        | 322 (127, 831)                                                  |
|                   |       | 13                          | 0.4                  | 9                   | 0.95        | 0.945                | 0.731 (0.667, 0.790) | 0.3 (0.1, 0.7)                                                                   | 5.5 (3.5, 8.1)                                                                          | 342 (134, 879)                                                  |
|                   |       | 13                          | 0.4                  | 11                  | 0.98        | 0.976                | 0.682 (0.614, 0.746) | 0.3 (0.1, 0.7)                                                                   | 2.4 (1.0, 4.4)                                                                          | 367 (148, 932)                                                  |
| Burkina Faso      | Men   | 10                          | 1.4                  | 14                  | 0.90        | 0.902                | 0.747 (0.690, 0.795) | 1 (0.6, 1.8)                                                                     | 9.7 (6.9, 13.0)                                                                         | 97 (56, 161)                                                    |
|                   |       | 10                          | 1.4                  | 18                  | 0.95        | 0.954                | 0.647 (0.564, 0.722) | 0.9 (0.5, 1.6)                                                                   | 4.6 (2.0, 7.9)                                                                          | 112 (64, 189)                                                   |
|                   |       | 10                          | 1.4                  | 21                  | 0.98        | 0.979                | 0.576 (0.473, 0.671) | 0.8 (0.5, 1.4)                                                                   | 2.1 (0.2, 5.2)                                                                          | 126 (71, 214)                                                   |
|                   | Women | 10                          | 0.0                  | 10                  | 0.90        | 0.908                | 0.901 (0.859, 0.938) | <0.1 (<0.1, 1.0)                                                                 | 9.2 (6.3, 12.0)                                                                         | 3701 (101, 118096)                                              |

| Country  | Sex   | Standard drink size (grams) | Prevalence (%) of AD | AUDIT cut-off score | Specificity | Specificity (actual) | Sensitivity (95% UI) | People who have AD and a positive AUDIT score [per 100 people screened] (95% UI) | People who do not have AD and a positive AUDIT score [per 100 people screened] (95% UI) | Number of people needed to screen to treat one AD case (95% UI) |
|----------|-------|-----------------------------|----------------------|---------------------|-------------|----------------------|----------------------|----------------------------------------------------------------------------------|-----------------------------------------------------------------------------------------|-----------------------------------------------------------------|
| Burundi  | Men   | 10                          | 0.0                  | 12                  | 0.95        | 0.947                | 0.864 (0.809, 0.915) | <0.1 (<0.1, 1.0)                                                                 | 5.3 (2.8, 8.0)                                                                          | 3857 (105, 123155)                                              |
|          |       | 10                          | 0.0                  | 15                  | 0.98        | 0.984                | 0.803 (0.721, 0.879) | <0.1 (<0.1, 0.9)                                                                 | 1.6 (0.1, 3.9)                                                                          | 4152 (111, 130779)                                              |
|          |       | 10                          | 3.9                  | 14                  | 0.90        | 0.902                | 0.747 (0.690, 0.795) | 2.9 (2.1, 3.9)                                                                   | 9.4 (6.7, 12.6)                                                                         | 34 (25, 47)                                                     |
|          |       | 10                          | 3.9                  | 18                  | 0.95        | 0.954                | 0.647 (0.564, 0.722) | 2.5 (1.8, 3.4)                                                                   | 4.4 (2.0, 7.7)                                                                          | 39 (29, 55)                                                     |
|          | Women | 10                          | 3.9                  | 21                  | 0.98        | 0.979                | 0.576 (0.473, 0.671) | 2.3 (1.6, 3.1)                                                                   | 2 (0.2, 5.1)                                                                            | 44 (32, 64)                                                     |
|          |       | 10                          | 0.9                  | 10                  | 0.90        | 0.908                | 0.901 (0.859, 0.938) | 0.8 (0.4, 1.5)                                                                   | 9.2 (6.2, 11.9)                                                                         | 124 (65, 240)                                                   |
|          |       | 10                          | 0.9                  | 12                  | 0.95        | 0.947                | 0.864 (0.809, 0.915) | 0.8 (0.4, 1.5)                                                                   | 5.3 (2.7, 7.9)                                                                          | 129 (68, 249)                                                   |
|          |       | 10                          | 0.9                  | 15                  | 0.98        | 0.984                | 0.803 (0.721, 0.879) | 0.7 (0.4, 1.4)                                                                   | 1.6 (0.1, 3.8)                                                                          | 139 (74, 272)                                                   |
| Cambodia | Men   | 10                          | 5.0                  | 14                  | 0.90        | 0.902                | 0.747 (0.690, 0.795) | 3.8 (2.8, 5.1)                                                                   | 9.3 (6.6, 12.5)                                                                         | 27 (20, 36)                                                     |
|          |       | 10                          | 5.0                  | 18                  | 0.95        | 0.954                | 0.647 (0.564, 0.722) | 3.3 (2.4, 4.4)                                                                   | 4.4 (2.0, 7.5)                                                                          | 31 (22, 42)                                                     |
|          |       | 10                          | 5.0                  | 21                  | 0.98        | 0.979                | 0.576 (0.473, 0.671) | 2.9 (2.1, 4.0)                                                                   | 2 (0.2, 5.0)                                                                            | 35 (25, 49)                                                     |
|          |       | 10                          | 0.7                  | 10                  | 0.90        | 0.908                | 0.901 (0.859, 0.938) | 0.6 (0.3, 1.2)                                                                   | 9.2 (6.3, 12.0)                                                                         | 168 (80, 352)                                                   |
|          | Women | 10                          | 0.7                  | 12                  | 0.95        | 0.947                | 0.864 (0.809, 0.915) | 0.6 (0.3, 1.2)                                                                   | 5.3 (2.7, 7.9)                                                                          | 175 (84, 367)                                                   |
|          |       | 10                          | 0.7                  | 15                  | 0.98        | 0.984                | 0.803 (0.721, 0.879) | 0.5 (0.2, 1.1)                                                                   | 1.6 (0.1, 3.8)                                                                          | 189 (90, 401)                                                   |
|          |       | 10                          | 4.0                  | 14                  | 0.90        | 0.902                | 0.747 (0.690, 0.795) | 3 (2.1, 4.1)                                                                     | 9.4 (6.7, 12.7)                                                                         | 33 (25, 47)                                                     |
|          |       | 10                          | 4.0                  | 18                  | 0.95        | 0.954                | 0.647 (0.564, 0.722) | 2.6 (1.9, 3.5)                                                                   | 4.4 (2.0, 7.7)                                                                          | 39 (28, 54)                                                     |
| Cameroon | Men   | 10                          | 4.0                  | 14                  | 0.90        | 0.902                | 0.747 (0.690, 0.795) | 3 (2.1, 4.1)                                                                     | 9.4 (6.7, 12.7)                                                                         | 33 (25, 47)                                                     |
|          |       | 10                          | 4.0                  | 18                  | 0.95        | 0.954                | 0.647 (0.564, 0.722) | 2.6 (1.9, 3.5)                                                                   | 4.4 (2.0, 7.7)                                                                          | 39 (28, 54)                                                     |

| Country | Sex   | Standard drink size (grams) | Prevalence (%) of AD | AUDIT cut-off score | Specificity | Specificity (actual) | Sensitivity (95% UI) | People who have AD and a positive AUDIT score [per 100 people screened] (95% UI) | People who do not have AD and a positive AUDIT score [per 100 people screened] (95% UI) | Number of people needed to screen to treat one AD case (95% UI) |                 |             |
|---------|-------|-----------------------------|----------------------|---------------------|-------------|----------------------|----------------------|----------------------------------------------------------------------------------|-----------------------------------------------------------------------------------------|-----------------------------------------------------------------|-----------------|-------------|
| Canada  | Women | 10                          | 4.0                  | 21                  | 0.98        | 0.979                | 0.576 (0.473, 0.671) | 2.3 (1.6, 3.2)                                                                   | 2 (0.2, 5.1)                                                                            | 43 (32, 62)                                                     |                 |             |
|         |       | 10                          | 0.9                  | 10                  | 0.90        | 0.908                | 0.901 (0.859, 0.938) | 0.8 (0.4, 1.6)                                                                   | 9.2 (6.2, 12.0)                                                                         | 120 (61, 231)                                                   |                 |             |
|         |       | 10                          | 0.9                  | 12                  | 0.95        | 0.947                | 0.864 (0.809, 0.915) | 0.8 (0.4, 1.5)                                                                   | 5.3 (2.7, 7.9)                                                                          | 125 (65, 242)                                                   |                 |             |
|         |       | 10                          | 0.9                  | 15                  | 0.98        | 0.984                | 0.803 (0.721, 0.879) | 0.7 (0.4, 1.4)                                                                   | 1.6 (0.1, 3.8)                                                                          | 135 (70, 265)                                                   |                 |             |
|         |       | 13.6                        | 6.0                  | 14                  | 0.90        | 0.9                  | 0.741 (0.676, 0.796) | 4.4 (3.3, 5.7)                                                                   | 9.4 (6.7, 13.0)                                                                         | 23 (18, 30)                                                     |                 |             |
|         |       | 13.6                        | 6.0                  | 18                  | 0.95        | 0.952                | 0.641 (0.552, 0.717) | 3.8 (2.8, 5.0)                                                                   | 4.5 (2.1, 8.0)                                                                          | 26 (20, 35)                                                     |                 |             |
|         | Men   | 13.6                        | 6.0                  | 21                  | 0.98        | 0.978                | 0.57 (0.463, 0.664)  | 3.4 (2.5, 4.5)                                                                   | 2.1 (0.3, 5.3)                                                                          | 29 (22, 40)                                                     |                 |             |
|         |       | 13.6                        | 2.3                  | 7                   | 0.90        | 0.91                 | 0.735 (0.651, 0.814) | 1.7 (1.1, 2.5)                                                                   | 8.8 (5.7, 12.8)                                                                         | 60 (40, 93)                                                     |                 |             |
|         |       | 13.6                        | 2.3                  | 9                   | 0.95        | 0.955                | 0.686 (0.604, 0.760) | 1.5 (1.0, 2.4)                                                                   | 4.4 (2.3, 7.4)                                                                          | 65 (43, 99)                                                     |                 |             |
|         |       | 13.6                        | 2.3                  | 11                  | 0.98        | 0.983                | 0.635 (0.552, 0.713) | 1.4 (0.9, 2.2)                                                                   | 1.7 (0.4, 3.8)                                                                          | 70 (45, 108)                                                    |                 |             |
|         |       | Cabo Verde                  | Men                  | 10                  | 3.7         | 14                   | 0.90                 | 0.902                                                                            | 0.747 (0.690, 0.795)                                                                    | 2.7 (2.0, 3.8)                                                  | 9.5 (6.8, 12.7) | 37 (26, 51) |
|         |       |                             |                      | 10                  | 3.7         | 18                   | 0.95                 | 0.954                                                                            | 0.647 (0.564, 0.722)                                                                    | 2.4 (1.7, 3.3)                                                  | 4.5 (2.0, 7.7)  | 42 (30, 60) |
| 10      | 3.7   |                             |                      | 21                  | 0.98        | 0.979                | 0.576 (0.473, 0.671) | 2.1 (1.5, 2.9)                                                                   | 2 (0.2, 5.1)                                                                            | 48 (34, 68)                                                     |                 |             |
| Women   | 10    |                             | 0.8                  | 10                  | 0.90        | 0.908                | 0.901 (0.859, 0.938) | 0.7 (0.4, 1.5)                                                                   | 9.2 (6.3, 12.0)                                                                         | 138 (69, 268)                                                   |                 |             |
|         | 10    |                             | 0.8                  | 12                  | 0.95        | 0.947                | 0.864 (0.809, 0.915) | 0.7 (0.4, 1.4)                                                                   | 5.3 (2.7, 8.0)                                                                          | 144 (73, 280)                                                   |                 |             |
|         | 10    |                             | 0.8                  | 15                  | 0.98        | 0.984                | 0.803 (0.721, 0.879) | 0.6 (0.3, 1.3)                                                                   | 1.6 (0.1, 3.8)                                                                          | 155 (80, 305)                                                   |                 |             |

| Country                  | Sex   | Standard drink size (grams) | Prevalence (%) of AD | AUDIT cut-off score | Specificity | Specificity (actual) | Sensitivity (95% UI) | People who have AD and a positive AUDIT score [per 100 people screened] (95% UI) | People who do not have AD and a positive AUDIT score [per 100 people screened] (95% UI) | Number of people needed to screen to treat one AD case (95% UI) |
|--------------------------|-------|-----------------------------|----------------------|---------------------|-------------|----------------------|----------------------|----------------------------------------------------------------------------------|-----------------------------------------------------------------------------------------|-----------------------------------------------------------------|
| Central African Republic | Men   | 10                          | 2.3                  | 14                  | 0.90        | 0.902                | 0.747 (0.690, 0.795) | 1.7 (1.1, 2.6)                                                                   | 9.6 (6.8, 12.8)                                                                         | 58 (39, 88)                                                     |
|                          |       | 10                          | 2.3                  | 18                  | 0.95        | 0.954                | 0.647 (0.564, 0.722) | 1.5 (1.0, 2.2)                                                                   | 4.5 (2.0, 7.8)                                                                          | 67 (45, 102)                                                    |
|                          |       | 10                          | 2.3                  | 21                  | 0.98        | 0.979                | 0.576 (0.473, 0.671) | 1.3 (0.8, 2.0)                                                                   | 2.1 (0.2, 5.1)                                                                          | 75 (49, 119)                                                    |
|                          | Women | 10                          | 0.3                  | 10                  | 0.90        | 0.908                | 0.901 (0.859, 0.938) | 0.3 (0.1, 0.9)                                                                   | 9.2 (6.3, 12.0)                                                                         | 322 (107, 1001)                                                 |
|                          |       | 10                          | 0.3                  | 12                  | 0.95        | 0.947                | 0.864 (0.809, 0.915) | 0.3 (0.1, 0.9)                                                                   | 5.3 (2.8, 8.0)                                                                          | 336 (109, 1041)                                                 |
|                          |       | 10                          | 0.3                  | 15                  | 0.98        | 0.984                | 0.803 (0.721, 0.879) | 0.3 (0.1, 0.8)                                                                   | 1.6 (0.1, 3.9)                                                                          | 362 (120, 1129)                                                 |
| Chad                     | Men   | 10                          | 1.4                  | 14                  | 0.90        | 0.902                | 0.747 (0.690, 0.795) | 1 (0.6, 1.7)                                                                     | 9.7 (6.9, 13.0)                                                                         | 97 (60, 170)                                                    |
|                          |       | 10                          | 1.4                  | 18                  | 0.95        | 0.954                | 0.647 (0.564, 0.722) | 0.9 (0.5, 1.5)                                                                   | 4.6 (2.0, 7.9)                                                                          | 112 (69, 198)                                                   |
|                          |       | 10                          | 1.4                  | 21                  | 0.98        | 0.979                | 0.576 (0.473, 0.671) | 0.8 (0.4, 1.3)                                                                   | 2.1 (0.2, 5.2)                                                                          | 126 (76, 227)                                                   |
|                          | Women | 10                          | 0.0                  | 10                  | 0.90        | 0.908                | 0.901 (0.859, 0.938) | <0.1 (<0.1, 0.9)                                                                 | 9.2 (6.3, 12.0)                                                                         | 3701 (113, 104501)                                              |
|                          |       | 10                          | 0.0                  | 12                  | 0.95        | 0.947                | 0.864 (0.809, 0.915) | <0.1 (<0.1, 0.8)                                                                 | 5.3 (2.8, 8.0)                                                                          | 3857 (118, 109307)                                              |
|                          |       | 10                          | 0.0                  | 15                  | 0.98        | 0.984                | 0.803 (0.721, 0.879) | <0.1 (<0.1, 0.8)                                                                 | 1.6 (0.1, 3.9)                                                                          | 4152 (129, 121602)                                              |
| Chile                    | Men   | 14                          | 4.3                  | 14                  | 0.90        | 0.899                | 0.741 (0.668, 0.800) | 3.2 (2.3, 4.2)                                                                   | 9.6 (6.6, 13.4)                                                                         | 32 (24, 43)                                                     |
|                          |       | 14                          | 4.3                  | 18                  | 0.95        | 0.952                | 0.641 (0.549, 0.722) | 2.7 (1.9, 3.7)                                                                   | 4.6 (2.1, 8.2)                                                                          | 36 (27, 51)                                                     |
|                          |       | 14                          | 4.3                  | 21                  | 0.98        | 0.978                | 0.569 (0.460, 0.667) | 2.4 (1.7, 3.3)                                                                   | 2.1 (0.3, 5.4)                                                                          | 41 (30, 60)                                                     |
|                          | Women | 14                          | 0.8                  | 6                   | 0.90        | 0.889                | 0.73 (0.630, 0.821)  | 0.6 (0.3, 1.2)                                                                   | 11 (6.9, 16.3)                                                                          | 179 (83, 360)                                                   |



| Country  | Sex   | Standard drink size (grams) | Prevalence (%) of AD | AUDIT cut-off score | Specificity | Specificity (actual) | Sensitivity (95% UI) | People who have AD and a positive AUDIT score [per 100 people screened] (95% UI) | People who do not have AD and a positive AUDIT score [per 100 people screened] (95% UI) | Number of people needed to screen to treat one AD case (95% UI) |
|----------|-------|-----------------------------|----------------------|---------------------|-------------|----------------------|----------------------|----------------------------------------------------------------------------------|-----------------------------------------------------------------------------------------|-----------------------------------------------------------------|
| China    | Men   | 14                          | 0.8                  | 8                   | 0.95        | 0.942                | 0.681 (0.587, 0.767) | 0.5 (0.3, 1.1)                                                                   | 5.8 (3.1, 9.5)                                                                          | 192 (88, 388)                                                   |
|          |       | 14                          | 0.8                  | 10                  | 0.98        | 0.975                | 0.63 (0.535, 0.714)  | 0.5 (0.2, 1.1)                                                                   | 2.4 (0.7, 5.2)                                                                          | 207 (95, 423)                                                   |
|          |       | 10                          | 4.4                  | 14                  | 0.90        | 0.902                | 0.747 (0.690, 0.795) | 3.3 (2.4, 4.5)                                                                   | 9.4 (6.7, 12.5)                                                                         | 30 (22, 42)                                                     |
|          |       | 10                          | 4.4                  | 18                  | 0.95        | 0.954                | 0.647 (0.564, 0.722) | 2.8 (2.1, 3.9)                                                                   | 4.4 (2.0, 7.6)                                                                          | 35 (26, 49)                                                     |
|          | Women | 10                          | 4.4                  | 21                  | 0.98        | 0.979                | 0.576 (0.473, 0.671) | 2.5 (1.8, 3.5)                                                                   | 2 (0.2, 5.0)                                                                            | 39 (28, 56)                                                     |
|          |       | 10                          | 0.1                  | 10                  | 0.90        | 0.908                | 0.901 (0.859, 0.938) | 0.1 (<0.1, 0.6)                                                                  | 9.2 (6.3, 12.0)                                                                         | 1110 (158, 8086)                                                |
|          |       | 10                          | 0.1                  | 12                  | 0.95        | 0.947                | 0.864 (0.809, 0.915) | 0.1 (<0.1, 0.6)                                                                  | 5.3 (2.8, 8.0)                                                                          | 1157 (162, 8267)                                                |
|          |       | 10                          | 0.1                  | 15                  | 0.98        | 0.984                | 0.803 (0.721, 0.879) | 0.1 (<0.1, 0.6)                                                                  | 1.6 (0.1, 3.9)                                                                          | 1246 (171, 8704)                                                |
| Colombia | Men   | 10                          | 4.5                  | 14                  | 0.90        | 0.902                | 0.747 (0.690, 0.795) | 3.3 (2.5, 4.5)                                                                   | 9.4 (6.7, 12.6)                                                                         | 30 (22, 40)                                                     |
|          |       | 10                          | 4.5                  | 18                  | 0.95        | 0.954                | 0.647 (0.564, 0.722) | 2.9 (2.2, 4.0)                                                                   | 4.4 (2.0, 7.6)                                                                          | 34 (25, 46)                                                     |
|          |       | 10                          | 4.5                  | 21                  | 0.98        | 0.979                | 0.576 (0.473, 0.671) | 2.6 (1.8, 3.6)                                                                   | 2 (0.2, 5.0)                                                                            | 39 (28, 54)                                                     |
|          | Women | 10                          | 1.9                  | 10                  | 0.90        | 0.908                | 0.901 (0.859, 0.938) | 1.7 (1.1, 2.8)                                                                   | 9.1 (6.2, 11.8)                                                                         | 58 (36, 91)                                                     |
|          |       | 10                          | 1.9                  | 12                  | 0.95        | 0.947                | 0.864 (0.809, 0.915) | 1.6 (1.1, 2.6)                                                                   | 5.2 (2.7, 7.9)                                                                          | 61 (38, 95)                                                     |
|          |       | 10                          | 1.9                  | 15                  | 0.98        | 0.984                | 0.803 (0.721, 0.879) | 1.5 (1.0, 2.5)                                                                   | 1.6 (0.1, 3.8)                                                                          | 66 (41, 102)                                                    |
| Comoros  | Men   | 10                          | 1.4                  | 14                  | 0.90        | 0.902                | 0.747 (0.690, 0.795) | 1 (0.6, 1.8)                                                                     | 9.7 (6.9, 12.9)                                                                         | 96 (57, 160)                                                    |
|          |       | 10                          | 1.4                  | 18                  | 0.95        | 0.954                | 0.647 (0.564, 0.722) | 0.9 (0.5, 1.5)                                                                   | 4.6 (2.0, 7.9)                                                                          | 110 (66, 186)                                                   |

| Country      | Sex   | Standard drink size (grams) | Prevalence (%) of AD | AUDIT cut-off score | Specificity | Specificity (actual) | Sensitivity (95% UI) | People who have AD and a positive AUDIT score [per 100 people screened] (95% UI) | People who do not have AD and a positive AUDIT score [per 100 people screened] (95% UI) | Number of people needed to screen to treat one AD case (95% UI) |
|--------------|-------|-----------------------------|----------------------|---------------------|-------------|----------------------|----------------------|----------------------------------------------------------------------------------|-----------------------------------------------------------------------------------------|-----------------------------------------------------------------|
| Congo        | Women | 10                          | 1.4                  | 21                  | 0.98        | 0.979                | 0.576 (0.473, 0.671) | 0.8 (0.5, 1.4)                                                                   | 2.1 (0.2, 5.2)                                                                          | 124 (74, 220)                                                   |
|              |       | 10                          | 0.0                  | 10                  | 0.90        | 0.908                | 0.901 (0.859, 0.938) | <0.1 (<0.1, 0.7)                                                                 | 9.2 (6.3, 12.0)                                                                         | 3701 (143, 142781)                                              |
|              |       | 10                          | 0.0                  | 12                  | 0.95        | 0.947                | 0.864 (0.809, 0.915) | <0.1 (<0.1, 0.7)                                                                 | 5.3 (2.8, 8.0)                                                                          | 3857 (147, 148424)                                              |
|              |       | 10                          | 0.0                  | 15                  | 0.98        | 0.984                | 0.803 (0.721, 0.879) | <0.1 (<0.1, 0.7)                                                                 | 1.6 (0.1, 3.9)                                                                          | 4152 (152, 156921)                                              |
|              | Men   | 10                          | 1.3                  | 14                  | 0.90        | 0.902                | 0.747 (0.690, 0.795) | 1 (0.6, 1.8)                                                                     | 9.7 (6.9, 12.9)                                                                         | 103 (57, 177)                                                   |
|              |       | 10                          | 1.3                  | 18                  | 0.95        | 0.954                | 0.647 (0.564, 0.722) | 0.8 (0.5, 1.5)                                                                   | 4.6 (2.0, 7.9)                                                                          | 119 (65, 208)                                                   |
|              |       | 10                          | 1.3                  | 21                  | 0.98        | 0.979                | 0.576 (0.473, 0.671) | 0.7 (0.4, 1.4)                                                                   | 2.1 (0.2, 5.2)                                                                          | 134 (72, 240)                                                   |
|              |       | 10                          | 0.2                  | 10                  | 0.90        | 0.908                | 0.901 (0.859, 0.938) | 0.2 (<0.1, 0.6)                                                                  | 9.2 (6.3, 12.0)                                                                         | 604 (160, 2561)                                                 |
| Cook Islands | Women | 10                          | 0.2                  | 12                  | 0.95        | 0.947                | 0.864 (0.809, 0.915) | 0.2 (<0.1, 0.6)                                                                  | 5.3 (2.8, 8.0)                                                                          | 629 (166, 2665)                                                 |
|              |       | 10                          | 0.2                  | 15                  | 0.98        | 0.984                | 0.803 (0.721, 0.879) | 0.1 (<0.1, 0.6)                                                                  | 1.6 (0.1, 3.9)                                                                          | 677 (176, 2894)                                                 |
|              |       | 10                          | 5.2                  | 14                  | 0.90        | 0.902                | 0.747 (0.690, 0.795) | 3.9 (3.0, 5.0)                                                                   | 9.3 (6.6, 12.4)                                                                         | 26 (20, 34)                                                     |
|              |       | 10                          | 5.2                  | 18                  | 0.95        | 0.954                | 0.647 (0.564, 0.722) | 3.4 (2.5, 4.4)                                                                   | 4.4 (2.0, 7.6)                                                                          | 29 (23, 40)                                                     |
|              | Men   | 10                          | 5.2                  | 21                  | 0.98        | 0.979                | 0.576 (0.473, 0.671) | 3 (2.2, 4.0)                                                                     | 2 (0.2, 5.0)                                                                            | 33 (25, 46)                                                     |
|              |       | 10                          | 0.7                  | 10                  | 0.90        | 0.908                | 0.901 (0.859, 0.938) | 0.6 (0.3, 1.3)                                                                   | 9.2 (6.3, 12.0)                                                                         | 168 (79, 351)                                                   |
|              |       | 10                          | 0.7                  | 12                  | 0.95        | 0.947                | 0.864 (0.809, 0.915) | 0.6 (0.3, 1.2)                                                                   | 5.3 (2.7, 8.0)                                                                          | 175 (82, 361)                                                   |
|              |       | 10                          | 0.7                  | 15                  | 0.98        | 0.984                | 0.803 (0.721, 0.879) | 0.5 (0.3, 1.1)                                                                   | 1.6 (0.1, 3.8)                                                                          | 189 (90, 389)                                                   |

| Country    | Sex   | Standard drink size (grams) | Prevalence (%) of AD | AUDIT cut-off score | Specificity | Specificity (actual) | Sensitivity (95% UI) | People who have AD and a positive AUDIT score [per 100 people screened] (95% UI) | People who do not have AD and a positive AUDIT score [per 100 people screened] (95% UI) | Number of people needed to screen to treat one AD case (95% UI) |
|------------|-------|-----------------------------|----------------------|---------------------|-------------|----------------------|----------------------|----------------------------------------------------------------------------------|-----------------------------------------------------------------------------------------|-----------------------------------------------------------------|
| Costa Rica | Men   | 10                          | 4.4                  | 14                  | 0.90        | 0.902                | 0.747 (0.690, 0.795) | 3.3 (2.5, 4.3)                                                                   | 9.4 (6.7, 12.6)                                                                         | 30 (23, 40)                                                     |
|            |       | 10                          | 4.4                  | 18                  | 0.95        | 0.954                | 0.647 (0.564, 0.722) | 2.9 (2.1, 3.8)                                                                   | 4.4 (2.0, 7.6)                                                                          | 35 (26, 47)                                                     |
|            |       | 10                          | 4.4                  | 21                  | 0.98        | 0.979                | 0.576 (0.473, 0.671) | 2.6 (1.8, 3.5)                                                                   | 2 (0.2, 5.0)                                                                            | 39 (29, 55)                                                     |
|            | Women | 10                          | 1.5                  | 10                  | 0.90        | 0.908                | 0.901 (0.859, 0.938) | 1.3 (0.8, 2.3)                                                                   | 9.1 (6.2, 11.9)                                                                         | 75 (43, 125)                                                    |
|            |       | 10                          | 1.5                  | 12                  | 0.95        | 0.947                | 0.864 (0.809, 0.915) | 1.3 (0.7, 2.2)                                                                   | 5.2 (2.7, 7.9)                                                                          | 78 (45, 134)                                                    |
|            |       | 10                          | 1.5                  | 15                  | 0.98        | 0.984                | 0.803 (0.721, 0.879) | 1.2 (0.7, 2.1)                                                                   | 1.6 (0.1, 3.8)                                                                          | 84 (49, 144)                                                    |
| Croatia    | Men   | 10                          | 5.6                  | 14                  | 0.90        | 0.902                | 0.747 (0.690, 0.795) | 4.2 (3.2, 5.4)                                                                   | 9.3 (6.6, 12.4)                                                                         | 24 (18, 31)                                                     |
|            |       | 10                          | 5.6                  | 18                  | 0.95        | 0.954                | 0.647 (0.564, 0.722) | 3.6 (2.7, 4.7)                                                                   | 4.4 (1.9, 7.5)                                                                          | 28 (21, 37)                                                     |
|            |       | 10                          | 5.6                  | 21                  | 0.98        | 0.979                | 0.576 (0.473, 0.671) | 3.2 (2.4, 4.3)                                                                   | 2 (0.2, 5.0)                                                                            | 31 (23, 42)                                                     |
|            | Women | 10                          | 1.4                  | 10                  | 0.90        | 0.908                | 0.901 (0.859, 0.938) | 1.2 (0.7, 2.0)                                                                   | 9.1 (6.2, 11.8)                                                                         | 82 (49, 137)                                                    |
|            |       | 10                          | 1.4                  | 12                  | 0.95        | 0.947                | 0.864 (0.809, 0.915) | 1.2 (0.7, 2.0)                                                                   | 5.2 (2.7, 7.9)                                                                          | 86 (51, 142)                                                    |
|            |       | 10                          | 1.4                  | 15                  | 0.98        | 0.984                | 0.803 (0.721, 0.879) | 1.1 (0.7, 1.8)                                                                   | 1.6 (0.1, 3.8)                                                                          | 92 (55, 153)                                                    |
| Cuba       | Men   | 10                          | 3.8                  | 14                  | 0.90        | 0.902                | 0.747 (0.690, 0.795) | 2.8 (2.0, 3.8)                                                                   | 9.5 (6.8, 12.7)                                                                         | 36 (26, 50)                                                     |
|            |       | 10                          | 3.8                  | 18                  | 0.95        | 0.954                | 0.647 (0.564, 0.722) | 2.4 (1.7, 3.3)                                                                   | 4.5 (2.0, 7.7)                                                                          | 41 (30, 59)                                                     |
|            |       | 10                          | 3.8                  | 21                  | 0.98        | 0.979                | 0.576 (0.473, 0.671) | 2.2 (1.5, 3.0)                                                                   | 2 (0.2, 5.1)                                                                            | 46 (33, 67)                                                     |
|            | Women | 10                          | 1.7                  | 10                  | 0.90        | 0.908                | 0.901 (0.859, 0.938) | 1.6 (1.0, 2.5)                                                                   | 9.1 (6.2, 11.8)                                                                         | 64 (40, 99)                                                     |

| Country        | Sex   | Standard drink size (grams) | Prevalence (%) of AD | AUDIT cut-off score | Specificity | Specificity (actual) | Sensitivity (95% UI) | People who have AD and a positive AUDIT score [per 100 people screened] (95% UI) | People who do not have AD and a positive AUDIT score [per 100 people screened] (95% UI) | Number of people needed to screen to treat one AD case (95% UI) |
|----------------|-------|-----------------------------|----------------------|---------------------|-------------|----------------------|----------------------|----------------------------------------------------------------------------------|-----------------------------------------------------------------------------------------|-----------------------------------------------------------------|
| Cyprus         | Men   | 10                          | 1.7                  | 12                  | 0.95        | 0.947                | 0.864 (0.809, 0.915) | 1.5 (1.0, 2.4)                                                                   | 5.2 (2.7, 7.9)                                                                          | 66 (42, 104)                                                    |
|                |       | 10                          | 1.7                  | 15                  | 0.98        | 0.984                | 0.803 (0.721, 0.879) | 1.4 (0.9, 2.2)                                                                   | 1.6 (0.1, 3.8)                                                                          | 72 (45, 112)                                                    |
|                |       | 10                          | 4.7                  | 14                  | 0.90        | 0.902                | 0.747 (0.690, 0.795) | 3.5 (2.6, 4.8)                                                                   | 9.4 (6.7, 12.5)                                                                         | 28 (21, 38)                                                     |
|                |       | 10                          | 4.7                  | 18                  | 0.95        | 0.954                | 0.647 (0.564, 0.722) | 3 (2.2, 4.2)                                                                     | 4.4 (2.0, 7.6)                                                                          | 33 (24, 45)                                                     |
|                | Women | 10                          | 4.7                  | 21                  | 0.98        | 0.979                | 0.576 (0.473, 0.671) | 2.7 (1.9, 3.8)                                                                   | 2 (0.2, 5.0)                                                                            | 37 (26, 52)                                                     |
|                |       | 10                          | 1.4                  | 10                  | 0.90        | 0.908                | 0.901 (0.859, 0.938) | 1.3 (0.8, 2.1)                                                                   | 9.1 (6.2, 11.8)                                                                         | 79 (49, 133)                                                    |
|                |       | 10                          | 1.4                  | 12                  | 0.95        | 0.947                | 0.864 (0.809, 0.915) | 1.2 (0.7, 2.0)                                                                   | 5.2 (2.7, 7.9)                                                                          | 83 (51, 140)                                                    |
|                |       | 10                          | 1.4                  | 15                  | 0.98        | 0.984                | 0.803 (0.721, 0.879) | 1.1 (0.7, 1.9)                                                                   | 1.6 (0.1, 3.8)                                                                          | 89 (53, 153)                                                    |
| Czech Republic | Men   | 16                          | 5.0                  | 14                  | 0.90        | 0.898                | 0.738 (0.624, 0.824) | 3.7 (2.6, 4.9)                                                                   | 9.7 (5.1, 15.4)                                                                         | 27 (20, 38)                                                     |
|                |       | 16                          | 5.0                  | 18                  | 0.95        | 0.951                | 0.637 (0.510, 0.742) | 3.2 (2.2, 4.3)                                                                   | 4.6 (1.5, 9.5)                                                                          | 31 (23, 45)                                                     |
|                |       | 16                          | 5.0                  | 21                  | 0.98        | 0.977                | 0.566 (0.423, 0.690) | 2.8 (1.9, 3.9)                                                                   | 2.2 (0.1, 6.3)                                                                          | 35 (25, 53)                                                     |
|                | Women | 16                          | 0.8                  | 5                   | 0.90        | 0.902                | 0.601 (0.431, 0.756) | 0.5 (0.2, 1.0)                                                                   | 9.7 (4.0, 18.6)                                                                         | 208 (98, 437)                                                   |
|                |       | 16                          | 0.8                  | 7                   | 0.95        | 0.955                | 0.549 (0.391, 0.698) | 0.4 (0.2, 0.9)                                                                   | 4.5 (1.0, 10.7)                                                                         | 228 (108, 475)                                                  |
|                |       | 16                          | 0.8                  | 9                   | 0.98        | 0.985                | 0.495 (0.347, 0.641) | 0.4 (0.2, 0.8)                                                                   | 1.5 (<0.1, 5.8)                                                                         | 252 (118, 532)                                                  |
| Cote d'Ivoire  | Men   | 10                          | 5.3                  | 14                  | 0.90        | 0.902                | 0.747 (0.690, 0.795) | 4 (3.0, 5.2)                                                                     | 9.3 (6.6, 12.4)                                                                         | 25 (19, 34)                                                     |
|                |       | 10                          | 5.3                  | 18                  | 0.95        | 0.954                | 0.647 (0.564, 0.722) | 3.4 (2.5, 4.6)                                                                   | 4.4 (1.9, 7.6)                                                                          | 29 (22, 39)                                                     |

| Country                                    | Sex   | Standard drink size (grams) | Prevalence (%) of AD | AUDIT cut-off score | Specificity | Specificity (actual) | Sensitivity (95% UI) | People who have AD and a positive AUDIT score [per 100 people screened] (95% UI) | People who do not have AD and a positive AUDIT score [per 100 people screened] (95% UI) | Number of people needed to screen to treat one AD case (95% UI) |
|--------------------------------------------|-------|-----------------------------|----------------------|---------------------|-------------|----------------------|----------------------|----------------------------------------------------------------------------------|-----------------------------------------------------------------------------------------|-----------------------------------------------------------------|
| Korea<br>(Democratic People's Republic of) | Women | 10                          | 5.3                  | 21                  | 0.98        | 0.979                | 0.576 (0.473, 0.671) | 3 (2.2, 4.2)                                                                     | 2 (0.2, 5.0)                                                                            | 33 (24, 46)                                                     |
|                                            |       | 10                          | 1.6                  | 10                  | 0.90        | 0.908                | 0.901 (0.859, 0.938) | 1.5 (0.9, 2.4)                                                                   | 9.1 (6.2, 11.8)                                                                         | 68 (42, 107)                                                    |
|                                            |       | 10                          | 1.6                  | 12                  | 0.95        | 0.947                | 0.864 (0.809, 0.915) | 1.4 (0.9, 2.3)                                                                   | 5.2 (2.7, 7.8)                                                                          | 71 (44, 112)                                                    |
|                                            |       | 10                          | 1.6                  | 15                  | 0.98        | 0.984                | 0.803 (0.721, 0.879) | 1.3 (0.8, 2.1)                                                                   | 1.6 (0.1, 3.8)                                                                          | 76 (47, 122)                                                    |
|                                            | Men   | 10                          | 2.4                  | 14                  | 0.90        | 0.902                | 0.747 (0.690, 0.795) | 1.8 (1.2, 2.7)                                                                   | 9.6 (6.8, 12.8)                                                                         | 55 (38, 83)                                                     |
|                                            |       | 10                          | 2.4                  | 18                  | 0.95        | 0.954                | 0.647 (0.564, 0.722) | 1.6 (1.0, 2.3)                                                                   | 4.5 (2.0, 7.8)                                                                          | 64 (43, 98)                                                     |
|                                            |       | 10                          | 2.4                  | 21                  | 0.98        | 0.979                | 0.576 (0.473, 0.671) | 1.4 (0.9, 2.1)                                                                   | 2.1 (0.2, 5.2)                                                                          | 72 (48, 113)                                                    |
|                                            |       | 10                          | 0.4                  | 10                  | 0.90        | 0.908                | 0.901 (0.859, 0.938) | 0.4 (0.1, 1.0)                                                                   | 9.2 (6.3, 12.0)                                                                         | 277 (100, 756)                                                  |
|                                            |       | 10                          | 0.4                  | 12                  | 0.95        | 0.947                | 0.864 (0.809, 0.915) | 0.3 (0.1, 1.0)                                                                   | 5.3 (2.8, 8.0)                                                                          | 288 (103, 786)                                                  |
|                                            |       | 10                          | 0.4                  | 15                  | 0.98        | 0.984                | 0.803 (0.721, 0.879) | 0.3 (0.1, 0.9)                                                                   | 1.6 (0.1, 3.8)                                                                          | 310 (110, 860)                                                  |
| Congo<br>(Democratic Republic of the)      | Men   | 10                          | 3.1                  | 14                  | 0.90        | 0.902                | 0.747 (0.690, 0.795) | 2.3 (1.6, 3.3)                                                                   | 9.5 (6.8, 12.7)                                                                         | 43 (31, 63)                                                     |
|                                            |       | 10                          | 3.1                  | 18                  | 0.95        | 0.954                | 0.647 (0.564, 0.722) | 2 (1.3, 2.9)                                                                     | 4.5 (2.0, 7.7)                                                                          | 50 (35, 75)                                                     |
|                                            |       | 10                          | 3.1                  | 21                  | 0.98        | 0.979                | 0.576 (0.473, 0.671) | 1.8 (1.2, 2.6)                                                                   | 2.1 (0.2, 5.2)                                                                          | 56 (39, 85)                                                     |
|                                            | Women | 10                          | 0.4                  | 10                  | 0.90        | 0.908                | 0.901 (0.859, 0.938) | 0.4 (0.1, 1.0)                                                                   | 9.2 (6.3, 12.0)                                                                         | 268 (100, 709)                                                  |

| Country  | Sex   | Standard drink size (grams) | Prevalence (%) of AD | AUDIT cut-off score | Specificity | Specificity (actual) | Sensitivity (95% UI) | People who have AD and a positive AUDIT score [per 100 people screened] (95% UI) | People who do not have AD and a positive AUDIT score [per 100 people screened] (95% UI) | Number of people needed to screen to treat one AD case (95% UI) |
|----------|-------|-----------------------------|----------------------|---------------------|-------------|----------------------|----------------------|----------------------------------------------------------------------------------|-----------------------------------------------------------------------------------------|-----------------------------------------------------------------|
| Denmark  | Men   | 10                          | 0.4                  | 12                  | 0.95        | 0.947                | 0.864 (0.809, 0.915) | 0.4 (0.1, 1.0)                                                                   | 5.3 (2.8, 8.0)                                                                          | 279 (105, 736)                                                  |
|          |       | 10                          | 0.4                  | 15                  | 0.98        | 0.984                | 0.803 (0.721, 0.879) | 0.3 (0.1, 0.9)                                                                   | 1.6 (0.1, 3.9)                                                                          | 301 (111, 792)                                                  |
|          |       | 12                          | 5.6                  | 14                  | 0.90        | 0.901                | 0.744 (0.695, 0.786) | 4.2 (3.2, 5.4)                                                                   | 9.4 (7.1, 12.0)                                                                         | 24 (19, 32)                                                     |
|          |       | 12                          | 5.6                  | 18                  | 0.95        | 0.953                | 0.644 (0.570, 0.707) | 3.6 (2.7, 4.7)                                                                   | 4.4 (2.3, 7.3)                                                                          | 28 (21, 37)                                                     |
|          | Women | 12                          | 5.6                  | 21                  | 0.98        | 0.978                | 0.572 (0.480, 0.655) | 3.2 (2.3, 4.3)                                                                   | 2.1 (0.4, 4.8)                                                                          | 31 (23, 43)                                                     |
|          |       | 12                          | 2.2                  | 8                   | 0.90        | 0.902                | 0.822 (0.781, 0.861) | 1.8 (1.2, 2.8)                                                                   | 9.6 (7.5, 11.9)                                                                         | 55 (36, 82)                                                     |
|          |       | 12                          | 2.2                  | 10                  | 0.95        | 0.946                | 0.779 (0.735, 0.819) | 1.7 (1.2, 2.6)                                                                   | 5.3 (3.6, 7.2)                                                                          | 58 (38, 87)                                                     |
|          |       | 12                          | 2.2                  | 12                  | 0.98        | 0.976                | 0.732 (0.677, 0.785) | 1.6 (1.1, 2.5)                                                                   | 2.4 (1.0, 4.0)                                                                          | 62 (40, 93)                                                     |
| Djibouti | Men   | 10                          | 0.3                  | 14                  | 0.90        | 0.902                | 0.747 (0.690, 0.795) | 0.2 (0.1, 0.8)                                                                   | 9.8 (7.0, 13.1)                                                                         | 406 (131, 1271)                                                 |
|          |       | 10                          | 0.3                  | 18                  | 0.95        | 0.954                | 0.647 (0.564, 0.722) | 0.2 (0.1, 0.7)                                                                   | 4.6 (2.0, 8.0)                                                                          | 468 (149, 1472)                                                 |
|          |       | 10                          | 0.3                  | 21                  | 0.98        | 0.979                | 0.576 (0.473, 0.671) | 0.2 (0.1, 0.6)                                                                   | 2.1 (0.2, 5.3)                                                                          | 526 (168, 1636)                                                 |
|          | Women | 10                          | 0.1                  | 10                  | 0.90        | 0.908                | 0.901 (0.859, 0.938) | 0.1 (<0.1, 0.8)                                                                  | 9.2 (6.3, 12.0)                                                                         | 1388 (133, 12957)                                               |
|          |       | 10                          | 0.1                  | 12                  | 0.95        | 0.947                | 0.864 (0.809, 0.915) | 0.1 (<0.1, 0.7)                                                                  | 5.3 (2.8, 8.0)                                                                          | 1446 (138, 13476)                                               |
|          |       | 10                          | 0.1                  | 15                  | 0.98        | 0.984                | 0.803 (0.721, 0.879) | 0.1 (<0.1, 0.7)                                                                  | 1.6 (0.1, 3.9)                                                                          | 1557 (148, 14474)                                               |
| Dominica | Men   | 10                          | 3.8                  | 14                  | 0.90        | 0.902                | 0.747 (0.690, 0.795) | 2.9 (2.1, 4.0)                                                                   | 9.5 (6.7, 12.6)                                                                         | 35 (25, 49)                                                     |
|          |       | 10                          | 3.8                  | 18                  | 0.95        | 0.954                | 0.647 (0.564, 0.722) | 2.5 (1.7, 3.5)                                                                   | 4.4 (2.0, 7.7)                                                                          | 40 (29, 58)                                                     |

| Country            | Sex   | Standard drink size (grams) | Prevalence (%) of AD | AUDIT cut-off score | Specificity | Specificity (actual) | Sensitivity (95% UI) | People who have AD and a positive AUDIT score [per 100 people screened] (95% UI) | People who do not have AD and a positive AUDIT score [per 100 people screened] (95% UI) | Number of people needed to screen to treat one AD case (95% UI) |
|--------------------|-------|-----------------------------|----------------------|---------------------|-------------|----------------------|----------------------|----------------------------------------------------------------------------------|-----------------------------------------------------------------------------------------|-----------------------------------------------------------------|
| Dominican Republic | Women | 10                          | 3.8                  | 21                  | 0.98        | 0.979                | 0.576 (0.473, 0.671) | 2.2 (1.5, 3.1)                                                                   | 2 (0.2, 5.1)                                                                            | 45 (32, 66)                                                     |
|                    |       | 10                          | 1.8                  | 10                  | 0.90        | 0.908                | 0.901 (0.859, 0.938) | 1.6 (1.0, 2.5)                                                                   | 9.1 (6.2, 11.8)                                                                         | 62 (40, 98)                                                     |
|                    |       | 10                          | 1.8                  | 12                  | 0.95        | 0.947                | 0.864 (0.809, 0.915) | 1.5 (1.0, 2.4)                                                                   | 5.2 (2.7, 7.9)                                                                          | 65 (42, 102)                                                    |
|                    |       | 10                          | 1.8                  | 15                  | 0.98        | 0.984                | 0.803 (0.721, 0.879) | 1.4 (0.9, 2.2)                                                                   | 1.6 (0.1, 3.8)                                                                          | 70 (45, 112)                                                    |
|                    |       | 10                          | 3.9                  | 14                  | 0.90        | 0.902                | 0.747 (0.690, 0.795) | 2.9 (2.1, 3.9)                                                                   | 9.4 (6.7, 12.6)                                                                         | 35 (25, 47)                                                     |
|                    | Men   | 10                          | 3.9                  | 18                  | 0.95        | 0.954                | 0.647 (0.564, 0.722) | 2.5 (1.8, 3.5)                                                                   | 4.4 (2.0, 7.7)                                                                          | 40 (29, 55)                                                     |
|                    |       | 10                          | 3.9                  | 21                  | 0.98        | 0.979                | 0.576 (0.473, 0.671) | 2.2 (1.6, 3.1)                                                                   | 2 (0.2, 5.1)                                                                            | 45 (32, 64)                                                     |
|                    |       | 10                          | 1.8                  | 10                  | 0.90        | 0.908                | 0.901 (0.859, 0.938) | 1.6 (1.1, 2.5)                                                                   | 9.1 (6.2, 11.8)                                                                         | 61 (40, 94)                                                     |
|                    |       | 10                          | 1.8                  | 12                  | 0.95        | 0.947                | 0.864 (0.809, 0.915) | 1.6 (1.0, 2.4)                                                                   | 5.2 (2.7, 7.9)                                                                          | 64 (42, 99)                                                     |
|                    |       | 10                          | 1.8                  | 15                  | 0.98        | 0.984                | 0.803 (0.721, 0.879) | 1.5 (0.9, 2.2)                                                                   | 1.6 (0.1, 3.8)                                                                          | 68 (45, 108)                                                    |
| Ecuador            | Men   | 10                          | 3.9                  | 14                  | 0.90        | 0.902                | 0.747 (0.690, 0.795) | 2.9 (2.1, 4.0)                                                                   | 9.4 (6.8, 12.6)                                                                         | 35 (25, 48)                                                     |
|                    |       | 10                          | 3.9                  | 18                  | 0.95        | 0.954                | 0.647 (0.564, 0.722) | 2.5 (1.8, 3.5)                                                                   | 4.4 (2.0, 7.7)                                                                          | 40 (28, 57)                                                     |
|                    |       | 10                          | 3.9                  | 21                  | 0.98        | 0.979                | 0.576 (0.473, 0.671) | 2.2 (1.5, 3.1)                                                                   | 2 (0.2, 5.1)                                                                            | 45 (32, 66)                                                     |
|                    | Women | 10                          | 1.8                  | 10                  | 0.90        | 0.908                | 0.901 (0.859, 0.938) | 1.6 (1.0, 2.5)                                                                   | 9.1 (6.2, 11.8)                                                                         | 61 (40, 98)                                                     |
|                    |       | 10                          | 1.8                  | 12                  | 0.95        | 0.947                | 0.864 (0.809, 0.915) | 1.6 (1.0, 2.4)                                                                   | 5.2 (2.7, 7.9)                                                                          | 64 (42, 105)                                                    |
|                    |       | 10                          | 1.8                  | 15                  | 0.98        | 0.984                | 0.803 (0.721, 0.879) | 1.5 (0.9, 2.3)                                                                   | 1.6 (0.1, 3.8)                                                                          | 69 (44, 113)                                                    |

| Country           | Sex   | Standard drink size (grams) | Prevalence (%) of AD | AUDIT cut-off score | Specificity | Specificity (actual) | Sensitivity (95% UI) | People who have AD and a positive AUDIT score [per 100 people screened] (95% UI) | People who do not have AD and a positive AUDIT score [per 100 people screened] (95% UI) | Number of people needed to screen to treat one AD case (95% UI) |
|-------------------|-------|-----------------------------|----------------------|---------------------|-------------|----------------------|----------------------|----------------------------------------------------------------------------------|-----------------------------------------------------------------------------------------|-----------------------------------------------------------------|
| Egypt             | Men   | 10                          | 1.2                  | 14                  | 0.90        | 0.902                | 0.747 (0.690, 0.795) | 0.9 (0.5, 1.6)                                                                   | 9.7 (7.0, 13.0)                                                                         | 110 (62, 187)                                                   |
|                   |       | 10                          | 1.2                  | 18                  | 0.95        | 0.954                | 0.647 (0.564, 0.722) | 0.8 (0.5, 1.4)                                                                   | 4.6 (2.0, 7.9)                                                                          | 127 (71, 220)                                                   |
|                   |       | 10                          | 1.2                  | 21                  | 0.98        | 0.979                | 0.576 (0.473, 0.671) | 0.7 (0.4, 1.3)                                                                   | 2.1 (0.2, 5.2)                                                                          | 143 (78, 251)                                                   |
|                   | Women | 10                          | 0.1                  | 10                  | 0.90        | 0.908                | 0.901 (0.859, 0.938) | <0.1 (<0.1, 0.7)                                                                 | 9.2 (6.3, 12.0)                                                                         | 2190 (136, 28178)                                               |
|                   |       | 10                          | 0.1                  | 12                  | 0.95        | 0.947                | 0.864 (0.809, 0.915) | <0.1 (<0.1, 0.7)                                                                 | 5.3 (2.8, 8.0)                                                                          | 2282 (141, 29503)                                               |
|                   |       | 10                          | 0.1                  | 15                  | 0.98        | 0.984                | 0.803 (0.721, 0.879) | <0.1 (<0.1, 0.7)                                                                 | 1.6 (0.1, 3.9)                                                                          | 2457 (151, 31578)                                               |
| El Salvador       | Men   | 10                          | 3.9                  | 14                  | 0.90        | 0.902                | 0.747 (0.690, 0.795) | 2.9 (2.1, 4.0)                                                                   | 9.4 (6.7, 12.7)                                                                         | 35 (25, 48)                                                     |
|                   |       | 10                          | 3.9                  | 18                  | 0.95        | 0.954                | 0.647 (0.564, 0.722) | 2.5 (1.8, 3.5)                                                                   | 4.4 (2.0, 7.7)                                                                          | 40 (29, 57)                                                     |
|                   |       | 10                          | 3.9                  | 21                  | 0.98        | 0.979                | 0.576 (0.473, 0.671) | 2.2 (1.5, 3.2)                                                                   | 2 (0.2, 5.1)                                                                            | 45 (31, 65)                                                     |
|                   | Women | 10                          | 1.8                  | 10                  | 0.90        | 0.908                | 0.901 (0.859, 0.938) | 1.6 (1.0, 2.6)                                                                   | 9.1 (6.2, 11.8)                                                                         | 62 (38, 97)                                                     |
|                   |       | 10                          | 1.8                  | 12                  | 0.95        | 0.947                | 0.864 (0.809, 0.915) | 1.6 (1.0, 2.5)                                                                   | 5.2 (2.7, 7.9)                                                                          | 64 (40, 100)                                                    |
|                   |       | 10                          | 1.8                  | 15                  | 0.98        | 0.984                | 0.803 (0.721, 0.879) | 1.4 (0.9, 2.3)                                                                   | 1.6 (0.1, 3.8)                                                                          | 69 (43, 110)                                                    |
| Equatorial Guinea | Men   | 10                          | 3.8                  | 14                  | 0.90        | 0.902                | 0.747 (0.690, 0.795) | 2.8 (2.0, 3.7)                                                                   | 9.5 (6.8, 12.6)                                                                         | 35 (27, 49)                                                     |
|                   |       | 10                          | 3.8                  | 18                  | 0.95        | 0.954                | 0.647 (0.564, 0.722) | 2.5 (1.7, 3.2)                                                                   | 4.5 (2.0, 7.7)                                                                          | 41 (31, 57)                                                     |
|                   |       | 10                          | 3.8                  | 21                  | 0.98        | 0.979                | 0.576 (0.473, 0.671) | 2.2 (1.5, 2.9)                                                                   | 2 (0.2, 5.1)                                                                            | 46 (34, 66)                                                     |
|                   | Women | 10                          | 0.8                  | 10                  | 0.90        | 0.908                | 0.901 (0.859, 0.938) | 0.7 (0.4, 1.4)                                                                   | 9.2 (6.3, 11.9)                                                                         | 141 (70, 270)                                                   |



| Country  | Sex   | Standard drink size (grams) | Prevalence (%) of AD | AUDIT cut-off score | Specificity | Specificity (actual) | Sensitivity (95% UI) | People who have AD and a positive AUDIT score [per 100 people screened] (95% UI) | People who do not have AD and a positive AUDIT score [per 100 people screened] (95% UI) | Number of people needed to screen to treat one AD case (95% UI) |
|----------|-------|-----------------------------|----------------------|---------------------|-------------|----------------------|----------------------|----------------------------------------------------------------------------------|-----------------------------------------------------------------------------------------|-----------------------------------------------------------------|
| Eritrea  | Men   | 10                          | 0.8                  | 12                  | 0.95        | 0.947                | 0.864 (0.809, 0.915) | 0.7 (0.4, 1.4)                                                                   | 5.3 (2.7, 8.0)                                                                          | 147 (73, 282)                                                   |
|          |       | 10                          | 0.8                  | 15                  | 0.98        | 0.984                | 0.803 (0.721, 0.879) | 0.6 (0.3, 1.3)                                                                   | 1.6 (0.1, 3.8)                                                                          | 158 (78, 305)                                                   |
|          |       | 10                          | 1.4                  | 14                  | 0.90        | 0.902                | 0.747 (0.690, 0.795) | 1 (0.6, 1.7)                                                                     | 9.7 (6.9, 13.0)                                                                         | 97 (60, 163)                                                    |
|          |       | 10                          | 1.4                  | 18                  | 0.95        | 0.954                | 0.647 (0.564, 0.722) | 0.9 (0.5, 1.5)                                                                   | 4.6 (2.0, 7.9)                                                                          | 112 (68, 191)                                                   |
|          | Women | 10                          | 1.4                  | 21                  | 0.98        | 0.979                | 0.576 (0.473, 0.671) | 0.8 (0.5, 1.3)                                                                   | 2.1 (0.2, 5.3)                                                                          | 126 (78, 216)                                                   |
|          |       | 10                          | 0.2                  | 10                  | 0.90        | 0.908                | 0.901 (0.859, 0.938) | 0.1 (<0.1, 0.7)                                                                  | 9.2 (6.3, 12.0)                                                                         | 729 (147, 3647)                                                 |
|          |       | 10                          | 0.2                  | 12                  | 0.95        | 0.947                | 0.864 (0.809, 0.915) | 0.1 (<0.1, 0.7)                                                                  | 5.3 (2.8, 8.0)                                                                          | 759 (153, 3802)                                                 |
|          |       | 10                          | 0.2                  | 15                  | 0.98        | 0.984                | 0.803 (0.721, 0.879) | 0.1 (<0.1, 0.6)                                                                  | 1.6 (0.1, 3.8)                                                                          | 817 (162, 4104)                                                 |
| Estonia  | Men   | 10                          | 9.9                  | 14                  | 0.90        | 0.902                | 0.747 (0.690, 0.795) | 7.4 (6.0, 9.0)                                                                   | 8.9 (6.3, 11.8)                                                                         | 14 (11, 17)                                                     |
|          |       | 10                          | 9.9                  | 18                  | 0.95        | 0.954                | 0.647 (0.564, 0.722) | 6.4 (5.1, 7.9)                                                                   | 4.2 (1.9, 7.2)                                                                          | 16 (13, 20)                                                     |
|          |       | 10                          | 9.9                  | 21                  | 0.98        | 0.979                | 0.576 (0.473, 0.671) | 5.7 (4.3, 7.2)                                                                   | 1.9 (0.2, 4.8)                                                                          | 18 (14, 23)                                                     |
|          | Women | 10                          | 1.7                  | 10                  | 0.90        | 0.908                | 0.901 (0.859, 0.938) | 1.5 (1.0, 2.5)                                                                   | 9.1 (6.2, 11.8)                                                                         | 65 (41, 102)                                                    |
|          |       | 10                          | 1.7                  | 12                  | 0.95        | 0.947                | 0.864 (0.809, 0.915) | 1.5 (0.9, 2.4)                                                                   | 5.2 (2.7, 7.9)                                                                          | 68 (42, 107)                                                    |
|          |       | 10                          | 1.7                  | 15                  | 0.98        | 0.984                | 0.803 (0.721, 0.879) | 1.4 (0.9, 2.2)                                                                   | 1.6 (0.1, 3.8)                                                                          | 73 (45, 116)                                                    |
| Ethiopia | Men   | 10                          | 1.5                  | 14                  | 0.90        | 0.902                | 0.747 (0.690, 0.795) | 1.1 (0.7, 1.9)                                                                   | 9.7 (6.9, 12.9)                                                                         | 89 (54, 147)                                                    |
|          |       | 10                          | 1.5                  | 18                  | 0.95        | 0.954                | 0.647 (0.564, 0.722) | 1 (0.6, 1.6)                                                                     | 4.6 (2.0, 7.9)                                                                          | 103 (62, 170)                                                   |

| Country | Sex   | Standard drink size (grams) | Prevalence (%) of AD | AUDIT cut-off score | Specificity | Specificity (actual) | Sensitivity (95% UI) | People who have AD and a positive AUDIT score [per 100 people screened] (95% UI) | People who do not have AD and a positive AUDIT score [per 100 people screened] (95% UI) | Number of people needed to screen to treat one AD case (95% UI) |
|---------|-------|-----------------------------|----------------------|---------------------|-------------|----------------------|----------------------|----------------------------------------------------------------------------------|-----------------------------------------------------------------------------------------|-----------------------------------------------------------------|
| Fiji    | Women | 10                          | 1.5                  | 21                  | 0.98        | 0.979                | 0.576 (0.473, 0.671) | 0.9 (0.5, 1.4)                                                                   | 2.1 (0.2, 5.2)                                                                          | 116 (70, 194)                                                   |
|         |       | 10                          | 0.1                  | 10                  | 0.90        | 0.908                | 0.901 (0.859, 0.938) | 0.1 (<0.1, 0.7)                                                                  | 9.2 (6.3, 12.0)                                                                         | 1851 (152, 23717)                                               |
|         |       | 10                          | 0.1                  | 12                  | 0.95        | 0.947                | 0.864 (0.809, 0.915) | 0.1 (<0.1, 0.6)                                                                  | 5.3 (2.7, 8.0)                                                                          | 1928 (156, 24389)                                               |
|         |       | 10                          | 0.1                  | 15                  | 0.98        | 0.984                | 0.803 (0.721, 0.879) | <0.1 (<0.1, 0.6)                                                                 | 1.6 (0.1, 3.9)                                                                          | 2076 (165, 27210)                                               |
|         |       | 10                          | 5.3                  | 14                  | 0.90        | 0.902                | 0.747 (0.690, 0.795) | 3.9 (3.0, 5.1)                                                                   | 9.3 (6.6, 12.4)                                                                         | 26 (19, 34)                                                     |
|         | Men   | 10                          | 5.3                  | 18                  | 0.95        | 0.954                | 0.647 (0.564, 0.722) | 3.4 (2.6, 4.5)                                                                   | 4.4 (2.0, 7.5)                                                                          | 29 (22, 39)                                                     |
|         |       | 10                          | 5.3                  | 21                  | 0.98        | 0.979                | 0.576 (0.473, 0.671) | 3 (2.2, 4.1)                                                                     | 2 (0.2, 5.0)                                                                            | 33 (25, 46)                                                     |
|         |       | 10                          | 0.7                  | 10                  | 0.90        | 0.908                | 0.901 (0.859, 0.938) | 0.6 (0.3, 1.4)                                                                   | 9.2 (6.3, 11.9)                                                                         | 166 (73, 338)                                                   |
|         |       | 10                          | 0.7                  | 12                  | 0.95        | 0.947                | 0.864 (0.809, 0.915) | 0.6 (0.3, 1.3)                                                                   | 5.3 (2.8, 8.0)                                                                          | 173 (76, 357)                                                   |
|         |       | 10                          | 0.7                  | 15                  | 0.98        | 0.984                | 0.803 (0.721, 0.879) | 0.5 (0.3, 1.2)                                                                   | 1.6 (0.1, 3.9)                                                                          | 186 (81, 395)                                                   |
| Finland | Men   | 12                          | 7.2                  | 14                  | 0.90        | 0.901                | 0.744 (0.695, 0.786) | 5.4 (4.2, 6.8)                                                                   | 9.2 (7.1, 11.8)                                                                         | 19 (15, 24)                                                     |
|         |       | 12                          | 7.2                  | 18                  | 0.95        | 0.953                | 0.644 (0.570, 0.707) | 4.6 (3.6, 5.9)                                                                   | 4.4 (2.2, 7.2)                                                                          | 22 (17, 28)                                                     |
|         |       | 12                          | 7.2                  | 21                  | 0.98        | 0.978                | 0.572 (0.480, 0.655) | 4.1 (3.1, 5.3)                                                                   | 2 (0.4, 4.7)                                                                            | 24 (19, 32)                                                     |
|         | Women | 12                          | 1.9                  | 8                   | 0.90        | 0.902                | 0.822 (0.781, 0.861) | 1.6 (1.0, 2.4)                                                                   | 9.6 (7.5, 12.0)                                                                         | 64 (42, 101)                                                    |
|         |       | 12                          | 1.9                  | 10                  | 0.95        | 0.946                | 0.779 (0.735, 0.819) | 1.5 (0.9, 2.3)                                                                   | 5.3 (3.6, 7.3)                                                                          | 68 (44, 106)                                                    |
|         |       | 12                          | 1.9                  | 12                  | 0.98        | 0.976                | 0.732 (0.677, 0.785) | 1.4 (0.9, 2.2)                                                                   | 2.4 (1.0, 4.0)                                                                          | 72 (46, 113)                                                    |

| Country | Sex   | Standard drink size (grams) | Prevalence (%) of AD | AUDIT cut-off score | Specificity | Specificity (actual) | Sensitivity (95% UI) | People who have AD and a positive AUDIT score [per 100 people screened] (95% UI) | People who do not have AD and a positive AUDIT score [per 100 people screened] (95% UI) | Number of people needed to screen to treat one AD case (95% UI) |
|---------|-------|-----------------------------|----------------------|---------------------|-------------|----------------------|----------------------|----------------------------------------------------------------------------------|-----------------------------------------------------------------------------------------|-----------------------------------------------------------------|
| France  | Men   | 10                          | 5.3                  | 14                  | 0.90        | 0.902                | 0.747 (0.690, 0.795) | 4 (3.0, 5.2)                                                                     | 9.3 (6.6, 12.4)                                                                         | 25 (19, 33)                                                     |
|         |       | 10                          | 5.3                  | 18                  | 0.95        | 0.954                | 0.647 (0.564, 0.722) | 3.4 (2.6, 4.5)                                                                   | 4.4 (1.9, 7.5)                                                                          | 29 (22, 39)                                                     |
|         |       | 10                          | 5.3                  | 21                  | 0.98        | 0.979                | 0.576 (0.473, 0.671) | 3.1 (2.2, 4.1)                                                                   | 2 (0.2, 5.0)                                                                            | 33 (24, 45)                                                     |
|         | Women | 10                          | 1.5                  | 10                  | 0.90        | 0.908                | 0.901 (0.859, 0.938) | 1.4 (0.8, 2.2)                                                                   | 9.1 (6.2, 11.9)                                                                         | 74 (46, 129)                                                    |
|         |       | 10                          | 1.5                  | 12                  | 0.95        | 0.947                | 0.864 (0.809, 0.915) | 1.3 (0.7, 2.1)                                                                   | 5.2 (2.7, 7.9)                                                                          | 77 (48, 135)                                                    |
|         |       | 10                          | 1.5                  | 15                  | 0.98        | 0.984                | 0.803 (0.721, 0.879) | 1.2 (0.7, 2.0)                                                                   | 1.6 (0.1, 3.8)                                                                          | 83 (50, 145)                                                    |
| Gabon   | Men   | 10                          | 3.9                  | 14                  | 0.90        | 0.902                | 0.747 (0.690, 0.795) | 2.9 (2.1, 3.9)                                                                   | 9.4 (6.8, 12.5)                                                                         | 34 (25, 47)                                                     |
|         |       | 10                          | 3.9                  | 18                  | 0.95        | 0.954                | 0.647 (0.564, 0.722) | 2.5 (1.8, 3.5)                                                                   | 4.4 (2.0, 7.7)                                                                          | 40 (29, 55)                                                     |
|         |       | 10                          | 3.9                  | 21                  | 0.98        | 0.979                | 0.576 (0.473, 0.671) | 2.2 (1.6, 3.1)                                                                   | 2 (0.2, 5.1)                                                                            | 45 (32, 64)                                                     |
|         | Women | 10                          | 0.8                  | 10                  | 0.90        | 0.908                | 0.901 (0.859, 0.938) | 0.8 (0.4, 1.4)                                                                   | 9.2 (6.3, 11.9)                                                                         | 131 (70, 259)                                                   |
|         |       | 10                          | 0.8                  | 12                  | 0.95        | 0.947                | 0.864 (0.809, 0.915) | 0.7 (0.4, 1.4)                                                                   | 5.3 (2.8, 8.0)                                                                          | 137 (73, 268)                                                   |
|         |       | 10                          | 0.8                  | 15                  | 0.98        | 0.984                | 0.803 (0.721, 0.879) | 0.7 (0.3, 1.3)                                                                   | 1.6 (0.1, 3.8)                                                                          | 147 (78, 293)                                                   |
| Gambia  | Men   | 10                          | 1.4                  | 14                  | 0.90        | 0.902                | 0.747 (0.690, 0.795) | 1 (0.6, 1.8)                                                                     | 9.7 (6.9, 12.9)                                                                         | 96 (57, 156)                                                    |
|         |       | 10                          | 1.4                  | 18                  | 0.95        | 0.954                | 0.647 (0.564, 0.722) | 0.9 (0.5, 1.5)                                                                   | 4.6 (2.0, 7.9)                                                                          | 111 (65, 183)                                                   |
|         |       | 10                          | 1.4                  | 21                  | 0.98        | 0.979                | 0.576 (0.473, 0.671) | 0.8 (0.5, 1.4)                                                                   | 2.1 (0.2, 5.2)                                                                          | 125 (74, 211)                                                   |
|         | Women | 10                          | 0.0                  | 10                  | 0.90        | 0.908                | 0.901 (0.859, 0.938) | <0.1 (<0.1, 0.9)                                                                 | 9.2 (6.3, 12.0)                                                                         | 3701 (108, 133189)                                              |

| Country | Sex   | Standard drink size (grams) | Prevalence (%) of AD | AUDIT cut-off score | Specificity | Specificity (actual) | Sensitivity (95% UI) | People who have AD and a positive AUDIT score [per 100 people screened] (95% UI) | People who do not have AD and a positive AUDIT score [per 100 people screened] (95% UI) | Number of people needed to screen to treat one AD case (95% UI) |
|---------|-------|-----------------------------|----------------------|---------------------|-------------|----------------------|----------------------|----------------------------------------------------------------------------------|-----------------------------------------------------------------------------------------|-----------------------------------------------------------------|
| Georgia | Men   | 10                          | 0.0                  | 12                  | 0.95        | 0.947                | 0.864 (0.809, 0.915) | <0.1 (<0.1, 0.9)                                                                 | 5.3 (2.8 , 8.0)                                                                         | 3857 (113, 139125)                                              |
|         |       | 10                          | 0.0                  | 15                  | 0.98        | 0.984                | 0.803 (0.721, 0.879) | <0.1 (<0.1, 0.8)                                                                 | 1.6 (0.1 , 3.8)                                                                         | 4152 (125, 150675)                                              |
|         |       | 10                          | 4.3                  | 14                  | 0.90        | 0.902                | 0.747 (0.690, 0.795) | 3.2 (2.4, 4.3)                                                                   | 9.4 (6.8 , 12.6)                                                                        | 31 (23, 42)                                                     |
|         |       | 10                          | 4.3                  | 18                  | 0.95        | 0.954                | 0.647 (0.564, 0.722) | 2.8 (2.0, 3.8)                                                                   | 4.4 (2.0 , 7.6)                                                                         | 36 (26, 49)                                                     |
|         | Women | 10                          | 4.3                  | 21                  | 0.98        | 0.979                | 0.576 (0.473, 0.671) | 2.5 (1.8, 3.5)                                                                   | 2 (0.2 , 5.1)                                                                           | 40 (29, 57)                                                     |
|         |       | 10                          | 0.2                  | 10                  | 0.90        | 0.908                | 0.901 (0.859, 0.938) | 0.2 (0.1, 0.7)                                                                   | 9.2 (6.3 , 12.0)                                                                        | 483 (142, 1846)                                                 |
|         |       | 10                          | 0.2                  | 12                  | 0.95        | 0.947                | 0.864 (0.809, 0.915) | 0.2 (0.1, 0.7)                                                                   | 5.3 (2.8 , 8.0)                                                                         | 503 (145, 1897)                                                 |
|         |       | 10                          | 0.2                  | 15                  | 0.98        | 0.984                | 0.803 (0.721, 0.879) | 0.2 (<0.1, 0.6)                                                                  | 1.6 (0.1 , 3.9)                                                                         | 542 (157, 2029)                                                 |
| Germany | Men   | 12                          | 5.0                  | 14                  | 0.90        | 0.901                | 0.744 (0.695, 0.786) | 3.7 (2.8, 4.8)                                                                   | 9.4 (7.2 , 12.1)                                                                        | 27 (21, 35)                                                     |
|         |       | 12                          | 5.0                  | 18                  | 0.95        | 0.953                | 0.644 (0.570, 0.707) | 3.2 (2.4, 4.3)                                                                   | 4.5 (2.3 , 7.4)                                                                         | 31 (23, 42)                                                     |
|         |       | 12                          | 5.0                  | 21                  | 0.98        | 0.978                | 0.572 (0.480, 0.655) | 2.9 (2.1, 3.9)                                                                   | 2.1 (0.4 , 4.9)                                                                         | 35 (26, 48)                                                     |
|         | Women | 12                          | 2.0                  | 8                   | 0.90        | 0.902                | 0.822 (0.781, 0.861) | 1.6 (1.0, 2.6)                                                                   | 9.6 (7.6 , 11.9)                                                                        | 61 (39, 96)                                                     |
|         |       | 12                          | 2.0                  | 10                  | 0.95        | 0.946                | 0.779 (0.735, 0.819) | 1.6 (1.0, 2.4)                                                                   | 5.3 (3.6 , 7.3)                                                                         | 64 (41, 101)                                                    |
|         |       | 12                          | 2.0                  | 12                  | 0.98        | 0.976                | 0.732 (0.677, 0.785) | 1.5 (0.9, 2.3)                                                                   | 2.4 (1.0 , 4.0)                                                                         | 68 (44, 108)                                                    |
| Ghana   | Men   | 10                          | 2.5                  | 14                  | 0.90        | 0.902                | 0.747 (0.690, 0.795) | 1.9 (1.2, 2.8)                                                                   | 9.6 (6.8 , 12.8)                                                                        | 54 (36, 83)                                                     |
|         |       | 10                          | 2.5                  | 18                  | 0.95        | 0.954                | 0.647 (0.564, 0.722) | 1.6 (1.0, 2.4)                                                                   | 4.5 (2.0 , 7.8)                                                                         | 62 (41, 97)                                                     |

| Country | Sex   | Standard drink size (grams) | Prevalence (%) of AD | AUDIT cut-off score | Specificity | Specificity (actual) | Sensitivity (95% UI) | People who have AD and a positive AUDIT score [per 100 people screened] (95% UI) | People who do not have AD and a positive AUDIT score [per 100 people screened] (95% UI) | Number of people needed to screen to treat one AD case (95% UI) |               |
|---------|-------|-----------------------------|----------------------|---------------------|-------------|----------------------|----------------------|----------------------------------------------------------------------------------|-----------------------------------------------------------------------------------------|-----------------------------------------------------------------|---------------|
| Greece  | Women | 10                          | 2.5                  | 21                  | 0.98        | 0.979                | 0.576 (0.473, 0.671) | 1.4 (0.9, 2.2)                                                                   | 2.1 (0.2, 5.2)                                                                          | 70 (45, 109)                                                    |               |
|         |       | 10                          | 0.4                  | 10                  | 0.90        | 0.908                | 0.901 (0.859, 0.938) | 0.4 (0.1, 0.9)                                                                   | 9.2 (6.3, 12.0)                                                                         | 285 (111, 740)                                                  |               |
|         |       | 10                          | 0.4                  | 12                  | 0.95        | 0.947                | 0.864 (0.809, 0.915) | 0.3 (0.1, 0.9)                                                                   | 5.3 (2.8, 8.0)                                                                          | 297 (115, 772)                                                  |               |
|         |       | 10                          | 0.4                  | 15                  | 0.98        | 0.984                | 0.803 (0.721, 0.879) | 0.3 (0.1, 0.8)                                                                   | 1.6 (0.1, 3.9)                                                                          | 320 (123, 829)                                                  |               |
|         | Men   | 13                          | 4.2                  | 14                  | 0.90        | 0.9                  | 0.742 (0.684, 0.791) | 3.1 (2.2, 4.3)                                                                   | 9.6 (7.1, 12.7)                                                                         | 32 (23, 45)                                                     |               |
|         |       | 13                          | 4.2                  | 18                  | 0.95        | 0.953                | 0.642 (0.560, 0.712) | 2.7 (1.9, 3.7)                                                                   | 4.5 (2.2, 7.8)                                                                          | 37 (27, 52)                                                     |               |
|         |       | 13                          | 4.2                  | 21                  | 0.98        | 0.978                | 0.571 (0.472, 0.660) | 2.4 (1.7, 3.3)                                                                   | 2.1 (0.4, 5.2)                                                                          | 42 (30, 61)                                                     |               |
|         |       | Women                       | 13                   | 1.3                 | 7           | 0.90                 | 0.897                | 0.778 (0.710, 0.840)                                                             | 1 (0.6, 1.7)                                                                            | 10.2 (7.3, 13.7)                                                | 99 (60, 173)  |
|         |       |                             | 13                   | 1.3                 | 9           | 0.95                 | 0.945                | 0.731 (0.667, 0.790)                                                             | 1 (0.5, 1.6)                                                                            | 5.5 (3.5, 8.1)                                                  | 105 (64, 183) |
|         |       |                             | 13                   | 1.3                 | 11          | 0.98                 | 0.976                | 0.682 (0.614, 0.746)                                                             | 0.9 (0.5, 1.5)                                                                          | 2.4 (1.0, 4.3)                                                  | 113 (68, 196) |
| Grenada | Men   | 14                          | 3.9                  | 14                  | 0.90        | 0.899                | 0.741 (0.668, 0.800) | 2.9 (2.1, 4.0)                                                                   | 9.7 (6.5, 13.5)                                                                         | 35 (25, 47)                                                     |               |
|         |       | 14                          | 3.9                  | 18                  | 0.95        | 0.952                | 0.641 (0.549, 0.722) | 2.5 (1.8, 3.4)                                                                   | 4.6 (2.1, 8.3)                                                                          | 40 (29, 55)                                                     |               |
|         |       | 14                          | 3.9                  | 21                  | 0.98        | 0.978                | 0.569 (0.460, 0.667) | 2.2 (1.6, 3.1)                                                                   | 2.1 (0.3, 5.5)                                                                          | 45 (32, 65)                                                     |               |
|         | Women | 14                          | 1.8                  | 6                   | 0.90        | 0.889                | 0.73 (0.630, 0.821)  | 1.3 (0.8, 2.1)                                                                   | 10.9 (6.8, 16.1)                                                                        | 77 (47, 122)                                                    |               |
|         |       | 14                          | 1.8                  | 8                   | 0.95        | 0.942                | 0.681 (0.587, 0.767) | 1.2 (0.8, 2.0)                                                                   | 5.7 (3.0, 9.4)                                                                          | 82 (50, 133)                                                    |               |
|         |       | 14                          | 1.8                  | 10                  | 0.98        | 0.975                | 0.63 (0.535, 0.714)  | 1.1 (0.7, 1.9)                                                                   | 2.4 (0.7, 5.1)                                                                          | 89 (54, 145)                                                    |               |

| Country       | Sex   | Standard drink size (grams) | Prevalence (%) of AD | AUDIT cut-off score | Specificity | Specificity (actual) | Sensitivity (95% UI) | People who have AD and a positive AUDIT score [per 100 people screened] (95% UI) | People who do not have AD and a positive AUDIT score [per 100 people screened] (95% UI) | Number of people needed to screen to treat one AD case (95% UI) |
|---------------|-------|-----------------------------|----------------------|---------------------|-------------|----------------------|----------------------|----------------------------------------------------------------------------------|-----------------------------------------------------------------------------------------|-----------------------------------------------------------------|
| Guatemala     | Men   | 10                          | 3.9                  | 14                  | 0.90        | 0.902                | 0.747 (0.690, 0.795) | 2.9 (2.1, 4.1)                                                                   | 9.4 (6.7, 12.6)                                                                         | 34 (25, 47)                                                     |
|               |       | 10                          | 3.9                  | 18                  | 0.95        | 0.954                | 0.647 (0.564, 0.722) | 2.5 (1.8, 3.6)                                                                   | 4.4 (2.0, 7.7)                                                                          | 40 (28, 55)                                                     |
|               |       | 10                          | 3.9                  | 21                  | 0.98        | 0.979                | 0.576 (0.473, 0.671) | 2.3 (1.6, 3.2)                                                                   | 2 (0.2, 5.1)                                                                            | 44 (31, 63)                                                     |
|               | Women | 10                          | 1.8                  | 10                  | 0.90        | 0.908                | 0.901 (0.859, 0.938) | 1.6 (1.1, 2.5)                                                                   | 9.1 (6.2, 11.8)                                                                         | 61 (39, 95)                                                     |
|               |       | 10                          | 1.8                  | 12                  | 0.95        | 0.947                | 0.864 (0.809, 0.915) | 1.6 (1.0, 2.4)                                                                   | 5.2 (2.7, 7.9)                                                                          | 63 (41, 100)                                                    |
|               |       | 10                          | 1.8                  | 15                  | 0.98        | 0.984                | 0.803 (0.721, 0.879) | 1.5 (0.9, 2.3)                                                                   | 1.6 (0.1, 3.8)                                                                          | 68 (44, 109)                                                    |
| Guinea        | Men   | 10                          | 1.4                  | 14                  | 0.90        | 0.902                | 0.747 (0.690, 0.795) | 1 (0.6, 1.7)                                                                     | 9.7 (6.9, 13.0)                                                                         | 96 (60, 163)                                                    |
|               |       | 10                          | 1.4                  | 18                  | 0.95        | 0.954                | 0.647 (0.564, 0.722) | 0.9 (0.5, 1.4)                                                                   | 4.6 (2.0, 7.9)                                                                          | 111 (69, 194)                                                   |
|               |       | 10                          | 1.4                  | 21                  | 0.98        | 0.979                | 0.576 (0.473, 0.671) | 0.8 (0.5, 1.3)                                                                   | 2.1 (0.2, 5.2)                                                                          | 125 (76, 219)                                                   |
|               | Women | 10                          | 0.0                  | 10                  | 0.90        | 0.908                | 0.901 (0.859, 0.938) | <0.1 (<0.1, 1.0)                                                                 | 9.2 (6.3, 12.0)                                                                         | 3701 (105, 141277)                                              |
|               |       | 10                          | 0.0                  | 12                  | 0.95        | 0.947                | 0.864 (0.809, 0.915) | <0.1 (<0.1, 0.9)                                                                 | 5.3 (2.8, 8.0)                                                                          | 3857 (108, 146843)                                              |
|               |       | 10                          | 0.0                  | 15                  | 0.98        | 0.984                | 0.803 (0.721, 0.879) | <0.1 (<0.1, 0.9)                                                                 | 1.6 (0.1, 3.9)                                                                          | 4152 (114, 162294)                                              |
| Guinea-Bissau | Men   | 10                          | 1.4                  | 14                  | 0.90        | 0.902                | 0.747 (0.690, 0.795) | 1 (0.6, 1.8)                                                                     | 9.7 (6.9, 12.9)                                                                         | 96 (57, 161)                                                    |
|               |       | 10                          | 1.4                  | 18                  | 0.95        | 0.954                | 0.647 (0.564, 0.722) | 0.9 (0.5, 1.5)                                                                   | 4.6 (2.0, 7.9)                                                                          | 111 (66, 189)                                                   |
|               |       | 10                          | 1.4                  | 21                  | 0.98        | 0.979                | 0.576 (0.473, 0.671) | 0.8 (0.5, 1.3)                                                                   | 2.1 (0.2, 5.2)                                                                          | 125 (74, 217)                                                   |
|               | Women | 10                          | 0.0                  | 10                  | 0.90        | 0.908                | 0.901 (0.859, 0.938) | <0.1 (<0.1, 1.2)                                                                 | 9.2 (6.3, 12.0)                                                                         | 3701 (87, 95860)                                                |

| Country  | Sex   | Standard drink size (grams) | Prevalence (%) of AD | AUDIT cut-off score | Specificity | Specificity (actual) | Sensitivity (95% UI) | People who have AD and a positive AUDIT score [per 100 people screened] (95% UI) |      | People who do not have AD and a positive AUDIT score [per 100 people screened] (95% UI) |     | Number of people needed to screen to treat one AD case (95% UI) |      |              |
|----------|-------|-----------------------------|----------------------|---------------------|-------------|----------------------|----------------------|----------------------------------------------------------------------------------|------|-----------------------------------------------------------------------------------------|-----|-----------------------------------------------------------------|------|--------------|
| Guyana   | Men   | 10                          | 0.0                  | 12                  | 0.95        | 0.947                | 0.864                | (0.809, 0.915)                                                                   | <0.1 | (<0.1, 1.1)                                                                             | 5.3 | (2.7, 8.0)                                                      | 3857 | (90, 101031) |
|          |       | 10                          | 0.0                  | 15                  | 0.98        | 0.984                | 0.803                | (0.721, 0.879)                                                                   | <0.1 | (<0.1, 1.0)                                                                             | 1.6 | (0.1, 3.9)                                                      | 4152 | (96, 111479) |
|          |       | 10                          | 3.9                  | 14                  | 0.90        | 0.902                | 0.747                | (0.690, 0.795)                                                                   | 2.9  | (2.2, 4.0)                                                                              | 9.4 | (6.7, 12.6)                                                     | 34   | (25, 46)     |
|          |       | 10                          | 3.9                  | 18                  | 0.95        | 0.954                | 0.647                | (0.564, 0.722)                                                                   | 2.6  | (1.8, 3.5)                                                                              | 4.4 | (2.0, 7.7)                                                      | 39   | (29, 54)     |
|          | Women | 10                          | 3.9                  | 21                  | 0.98        | 0.979                | 0.576                | (0.473, 0.671)                                                                   | 2.3  | (1.6, 3.2)                                                                              | 2   | (0.2, 5.1)                                                      | 44   | (31, 62)     |
|          |       | 10                          | 1.9                  | 10                  | 0.90        | 0.908                | 0.901                | (0.859, 0.938)                                                                   | 1.7  | (1.0, 2.6)                                                                              | 9.1 | (6.2, 11.8)                                                     | 60   | (38, 96)     |
|          |       | 10                          | 1.9                  | 12                  | 0.95        | 0.947                | 0.864                | (0.809, 0.915)                                                                   | 1.6  | (1.0, 2.5)                                                                              | 5.2 | (2.7, 7.8)                                                      | 63   | (40, 100)    |
|          |       | 10                          | 1.9                  | 15                  | 0.98        | 0.984                | 0.803                | (0.721, 0.879)                                                                   | 1.5  | (0.9, 2.3)                                                                              | 1.6 | (0.1, 3.8)                                                      | 67   | (43, 109)    |
| Haiti    | Men   | 10                          | 3.9                  | 14                  | 0.90        | 0.902                | 0.747                | (0.690, 0.795)                                                                   | 2.9  | (2.1, 3.9)                                                                              | 9.4 | (6.8, 12.7)                                                     | 34   | (26, 47)     |
|          |       | 10                          | 3.9                  | 18                  | 0.95        | 0.954                | 0.647                | (0.564, 0.722)                                                                   | 2.5  | (1.8, 3.5)                                                                              | 4.4 | (2.0, 7.7)                                                      | 39   | (29, 55)     |
|          |       | 10                          | 3.9                  | 21                  | 0.98        | 0.979                | 0.576                | (0.473, 0.671)                                                                   | 2.3  | (1.6, 3.2)                                                                              | 2   | (0.2, 5.1)                                                      | 44   | (32, 64)     |
|          | Women | 10                          | 1.8                  | 10                  | 0.90        | 0.908                | 0.901                | (0.859, 0.938)                                                                   | 1.6  | (1.0, 2.6)                                                                              | 9.1 | (6.2, 11.8)                                                     | 61   | (38, 96)     |
|          |       | 10                          | 1.8                  | 12                  | 0.95        | 0.947                | 0.864                | (0.809, 0.915)                                                                   | 1.6  | (1.0, 2.5)                                                                              | 5.2 | (2.7, 7.9)                                                      | 63   | (40, 100)    |
|          |       | 10                          | 1.8                  | 15                  | 0.98        | 0.984                | 0.803                | (0.721, 0.879)                                                                   | 1.5  | (0.9, 2.3)                                                                              | 1.6 | (0.1, 3.8)                                                      | 68   | (43, 109)    |
| Honduras | Men   | 10                          | 3.9                  | 14                  | 0.90        | 0.902                | 0.747                | (0.690, 0.795)                                                                   | 2.9  | (2.1, 4.0)                                                                              | 9.4 | (6.7, 12.7)                                                     | 34   | (25, 47)     |
|          |       | 10                          | 3.9                  | 18                  | 0.95        | 0.954                | 0.647                | (0.564, 0.722)                                                                   | 2.5  | (1.8, 3.5)                                                                              | 4.4 | (2.0, 7.7)                                                      | 39   | (29, 56)     |

| Country | Sex   | Standard drink size (grams) | Prevalence (%) of AD | AUDIT cut-off score | Specificity | Specificity (actual) | Sensitivity (95% UI) | People who have AD and a positive AUDIT score [per 100 people screened] (95% UI) | People who do not have AD and a positive AUDIT score [per 100 people screened] (95% UI) | Number of people needed to screen to treat one AD case (95% UI) |             |
|---------|-------|-----------------------------|----------------------|---------------------|-------------|----------------------|----------------------|----------------------------------------------------------------------------------|-----------------------------------------------------------------------------------------|-----------------------------------------------------------------|-------------|
| Hungary | Women | 10                          | 3.9                  | 21                  | 0.98        | 0.979                | 0.576 (0.473, 0.671) | 2.3 (1.6, 3.2)                                                                   | 2 (0.2, 5.1)                                                                            | 44 (31, 64)                                                     |             |
|         |       | 10                          | 1.8                  | 10                  | 0.90        | 0.908                | 0.901 (0.859, 0.938) | 1.7 (1.1, 2.6)                                                                   | 9.1 (6.2, 11.8)                                                                         | 60 (39, 93)                                                     |             |
|         |       | 10                          | 1.8                  | 12                  | 0.95        | 0.947                | 0.864 (0.809, 0.915) | 1.6 (1.0, 2.5)                                                                   | 5.2 (2.7, 7.9)                                                                          | 63 (40, 97)                                                     |             |
|         |       | 10                          | 1.8                  | 15                  | 0.98        | 0.984                | 0.803 (0.721, 0.879) | 1.5 (0.9, 2.3)                                                                   | 1.6 (0.1, 3.8)                                                                          | 68 (43, 106)                                                    |             |
|         | Men   | 12                          | 16.5                 | 14                  | 0.90        | 0.901                | 0.744 (0.695, 0.786) | 12.3 (10.5, 14.1)                                                                | 8.3 (6.3, 10.6)                                                                         | 8 (7, 9)                                                        |             |
|         |       | 12                          | 16.5                 | 18                  | 0.95        | 0.953                | 0.644 (0.570, 0.707) | 10.6 (8.9, 12.5)                                                                 | 3.9 (2.0, 6.5)                                                                          | 9 (8, 11)                                                       |             |
|         |       | 12                          | 16.5                 | 21                  | 0.98        | 0.978                | 0.572 (0.480, 0.655) | 9.4 (7.6, 11.5)                                                                  | 1.8 (0.3, 4.3)                                                                          | 11 (9, 13)                                                      |             |
|         |       | Women                       | 12                   | 3.2                 | 8           | 0.90                 | 0.902                | 0.822 (0.781, 0.861)                                                             | 2.6 (1.9, 3.7)                                                                          | 9.5 (7.5, 11.8)                                                 | 38 (27, 53) |
|         |       |                             | 12                   | 3.2                 | 10          | 0.95                 | 0.946                | 0.779 (0.735, 0.819)                                                             | 2.5 (1.8, 3.6)                                                                          | 5.2 (3.6, 7.1)                                                  | 40 (28, 56) |
|         |       | 12                          | 3.2                  | 12                  | 0.98        | 0.976                | 0.732 (0.677, 0.785) | 2.3 (1.7, 3.3)                                                                   | 2.3 (1.0, 4.0)                                                                          | 43 (30, 60)                                                     |             |
| Iceland | Men   | 8                           | 3.0                  | 14                  | 0.90        | 0.903                | 0.75 (0.662, 0.827)  | 2.2 (1.5, 3.3)                                                                   | 9.4 (5.4, 14.1)                                                                         | 44 (31, 65)                                                     |             |
|         |       | 8                           | 3.0                  | 18                  | 0.95        | 0.955                | 0.651 (0.538, 0.746) | 2 (1.3, 2.9)                                                                     | 4.4 (1.4, 8.7)                                                                          | 51 (35, 78)                                                     |             |
|         |       | 8                           | 3.0                  | 21                  | 0.98        | 0.979                | 0.579 (0.452, 0.693) | 1.7 (1.1, 2.6)                                                                   | 2 (<0.1, 5.7)                                                                           | 58 (38, 92)                                                     |             |
|         | Women | 8                           | 0.9                  | 12                  | 0.90        | 0.908                | 0.961 (0.892, 0.999) | 0.9 (0.4, 1.7)                                                                   | 9.1 (4.1, 14.4)                                                                         | 116 (60, 226)                                                   |             |
|         |       | 8                           | 0.9                  | 14                  | 0.95        | 0.945                | 0.934 (0.849, 0.991) | 0.8 (0.4, 1.6)                                                                   | 5.5 (1.5, 10.5)                                                                         | 119 (62, 233)                                                   |             |
|         |       | 8                           | 0.9                  | 17                  | 0.98        | 0.981                | 0.885 (0.770, 0.972) | 0.8 (0.4, 1.5)                                                                   | 1.9 (<0.1, 6.0)                                                                         | 126 (65, 249)                                                   |             |



| Country                    | Sex   | Standard drink size (grams) | Prevalence (%) of AD | AUDIT cut-off score | Specificity | Specificity (actual) | Sensitivity (95% UI) | People who have AD and a positive AUDIT score [per 100 people screened] (95% UI) | People who do not have AD and a positive AUDIT score [per 100 people screened] (95% UI) | Number of people needed to screen to treat one AD case (95% UI) |
|----------------------------|-------|-----------------------------|----------------------|---------------------|-------------|----------------------|----------------------|----------------------------------------------------------------------------------|-----------------------------------------------------------------------------------------|-----------------------------------------------------------------|
| India                      | Men   | 10                          | 7.0                  | 14                  | 0.90        | 0.902                | 0.747 (0.690, 0.795) | 5.2 (4.1, 6.6)                                                                   | 9.1 (6.5, 12.2)                                                                         | 19 (15, 25)                                                     |
|                            |       | 10                          | 7.0                  | 18                  | 0.95        | 0.954                | 0.647 (0.564, 0.722) | 4.5 (3.5, 5.9)                                                                   | 4.3 (1.9, 7.4)                                                                          | 22 (17, 29)                                                     |
|                            |       | 10                          | 7.0                  | 21                  | 0.98        | 0.979                | 0.576 (0.473, 0.671) | 4 (3.0, 5.3)                                                                     | 2 (0.2, 4.9)                                                                            | 25 (19, 34)                                                     |
|                            | Women | 10                          | 0.4                  | 10                  | 0.90        | 0.908                | 0.901 (0.859, 0.938) | 0.3 (0.1, 0.9)                                                                   | 9.2 (6.3, 12.0)                                                                         | 310 (112, 906)                                                  |
|                            |       | 10                          | 0.4                  | 12                  | 0.95        | 0.947                | 0.864 (0.809, 0.915) | 0.3 (0.1, 0.9)                                                                   | 5.3 (2.8, 8.0)                                                                          | 323 (117, 948)                                                  |
|                            |       | 10                          | 0.4                  | 15                  | 0.98        | 0.984                | 0.803 (0.721, 0.879) | 0.3 (0.1, 0.8)                                                                   | 1.6 (0.1, 3.8)                                                                          | 348 (126, 1034)                                                 |
| Indonesia                  | Men   | 10                          | 1.3                  | 14                  | 0.90        | 0.902                | 0.747 (0.690, 0.795) | 0.9 (0.5, 1.6)                                                                   | 9.7 (6.9, 13.0)                                                                         | 107 (63, 185)                                                   |
|                            |       | 10                          | 1.3                  | 18                  | 0.95        | 0.954                | 0.647 (0.564, 0.722) | 0.8 (0.5, 1.4)                                                                   | 4.6 (2.0, 7.9)                                                                          | 124 (72, 218)                                                   |
|                            |       | 10                          | 1.3                  | 21                  | 0.98        | 0.979                | 0.576 (0.473, 0.671) | 0.7 (0.4, 1.2)                                                                   | 2.1 (0.2, 5.2)                                                                          | 139 (81, 256)                                                   |
|                            | Women | 10                          | 0.2                  | 10                  | 0.90        | 0.908                | 0.901 (0.859, 0.938) | 0.2 (0.1, 0.8)                                                                   | 9.2 (6.3, 12.0)                                                                         | 463 (129, 1626)                                                 |
|                            |       | 10                          | 0.2                  | 12                  | 0.95        | 0.947                | 0.864 (0.809, 0.915) | 0.2 (0.1, 0.7)                                                                   | 5.3 (2.8, 8.0)                                                                          | 482 (135, 1690)                                                 |
|                            |       | 10                          | 0.2                  | 15                  | 0.98        | 0.984                | 0.803 (0.721, 0.879) | 0.2 (0.1, 0.7)                                                                   | 1.6 (0.1, 3.9)                                                                          | 519 (143, 1821)                                                 |
| Iran (Islamic Republic of) | Men   | 10                          | 1.2                  | 14                  | 0.90        | 0.902                | 0.747 (0.690, 0.795) | 0.9 (0.5, 1.5)                                                                   | 9.7 (6.9, 13.0)                                                                         | 114 (65, 199)                                                   |
|                            |       | 10                          | 1.2                  | 18                  | 0.95        | 0.954                | 0.647 (0.564, 0.722) | 0.8 (0.4, 1.4)                                                                   | 4.6 (2.0, 7.9)                                                                          | 132 (74, 232)                                                   |
|                            |       | 10                          | 1.2                  | 21                  | 0.98        | 0.979                | 0.576 (0.473, 0.671) | 0.7 (0.4, 1.2)                                                                   | 2.1 (0.2, 5.3)                                                                          | 148 (81, 264)                                                   |
|                            | Women | 10                          | 0.1                  | 10                  | 0.90        | 0.908                | 0.901 (0.859, 0.938) | 0.1 (<0.1, 0.7)                                                                  | 9.2 (6.3, 12.0)                                                                         | 1388 (150, 13654)                                               |

| Country | Sex   | Standard drink size (grams) | Prevalence (%) of AD | AUDIT cut-off score | Specificity | Specificity (actual) | Sensitivity (95% UI) | People who have AD and a positive AUDIT score [per 100 people screened] (95% UI) | People who do not have AD and a positive AUDIT score [per 100 people screened] (95% UI) | Number of people needed to screen to treat one AD case (95% UI) |
|---------|-------|-----------------------------|----------------------|---------------------|-------------|----------------------|----------------------|----------------------------------------------------------------------------------|-----------------------------------------------------------------------------------------|-----------------------------------------------------------------|
| Iraq    | Men   | 10                          | 0.1                  | 12                  | 0.95        | 0.947                | 0.864 (0.809, 0.915) | 0.1 (<0.1, 0.6)                                                                  | 5.3 (2.8, 8.0)                                                                          | 1446 (158, 14100)                                               |
|         |       | 10                          | 0.1                  | 15                  | 0.98        | 0.984                | 0.803 (0.721, 0.879) | 0.1 (<0.1, 0.6)                                                                  | 1.6 (0.1, 3.9)                                                                          | 1557 (166, 15277)                                               |
|         |       | 10                          | 0.3                  | 14                  | 0.90        | 0.902                | 0.747 (0.690, 0.795) | 0.2 (0.1, 0.7)                                                                   | 9.8 (7.0, 13.1)                                                                         | 406 (138, 1258)                                                 |
|         | Women | 10                          | 0.3                  | 18                  | 0.95        | 0.954                | 0.647 (0.564, 0.722) | 0.2 (0.1, 0.6)                                                                   | 4.6 (2.0, 8.0)                                                                          | 468 (163, 1429)                                                 |
|         |       | 10                          | 0.3                  | 21                  | 0.98        | 0.979                | 0.576 (0.473, 0.671) | 0.2 (0.1, 0.6)                                                                   | 2.1 (0.2, 5.3)                                                                          | 526 (182, 1632)                                                 |
|         |       | 10                          | 0.1                  | 10                  | 0.90        | 0.908                | 0.901 (0.859, 0.938) | 0.1 (<0.1, 0.7)                                                                  | 9.2 (6.3, 12.0)                                                                         | 1388 (139, 12989)                                               |
| Ireland | Men   | 10                          | 0.1                  | 12                  | 0.95        | 0.947                | 0.864 (0.809, 0.915) | 0.1 (<0.1, 0.7)                                                                  | 5.3 (2.8, 8.0)                                                                          | 1446 (145, 13579)                                               |
|         |       | 10                          | 0.1                  | 15                  | 0.98        | 0.984                | 0.803 (0.721, 0.879) | 0.1 (<0.1, 0.6)                                                                  | 1.6 (0.1, 3.9)                                                                          | 1557 (157, 14742)                                               |
|         |       | 10                          | 5.8                  | 14                  | 0.90        | 0.902                | 0.747 (0.690, 0.795) | 4.3 (3.3, 5.5)                                                                   | 9.3 (6.6, 12.3)                                                                         | 23 (18, 30)                                                     |
|         | Women | 10                          | 5.8                  | 18                  | 0.95        | 0.954                | 0.647 (0.564, 0.722) | 3.8 (2.7, 4.9)                                                                   | 4.4 (1.9, 7.6)                                                                          | 27 (21, 37)                                                     |
|         |       | 10                          | 5.8                  | 21                  | 0.98        | 0.979                | 0.576 (0.473, 0.671) | 3.3 (2.3, 4.4)                                                                   | 2 (0.2, 5.0)                                                                            | 30 (22, 43)                                                     |
|         |       | 10                          | 1.8                  | 10                  | 0.90        | 0.908                | 0.901 (0.859, 0.938) | 1.6 (1.0, 2.6)                                                                   | 9.1 (6.2, 11.8)                                                                         | 62 (38, 99)                                                     |
| Israel  | Men   | 10                          | 1.8                  | 12                  | 0.95        | 0.947                | 0.864 (0.809, 0.915) | 1.6 (1.0, 2.5)                                                                   | 5.2 (2.7, 7.9)                                                                          | 64 (40, 103)                                                    |
|         |       | 10                          | 1.8                  | 15                  | 0.98        | 0.984                | 0.803 (0.721, 0.879) | 1.4 (0.9, 2.3)                                                                   | 1.6 (0.1, 3.8)                                                                          | 69 (43, 112)                                                    |
|         | Men   | 10                          | 5.4                  | 14                  | 0.90        | 0.902                | 0.747 (0.690, 0.795) | 4 (3.1, 5.3)                                                                     | 9.3 (6.6, 12.4)                                                                         | 25 (19, 33)                                                     |
|         |       | 10                          | 5.4                  | 18                  | 0.95        | 0.954                | 0.647 (0.564, 0.722) | 3.5 (2.6, 4.7)                                                                   | 4.4 (2.0, 7.5)                                                                          | 29 (21, 39)                                                     |

| Country | Sex   | Standard drink size (grams) | Prevalence (%) of AD | AUDIT cut-off score | Specificity | Specificity (actual) | Sensitivity (95% UI) | People who have AD and a positive AUDIT score [per 100 people screened] (95% UI) | People who do not have AD and a positive AUDIT score [per 100 people screened] (95% UI) | Number of people needed to screen to treat one AD case (95% UI) |
|---------|-------|-----------------------------|----------------------|---------------------|-------------|----------------------|----------------------|----------------------------------------------------------------------------------|-----------------------------------------------------------------------------------------|-----------------------------------------------------------------|
| Italy   | Women | 10                          | 5.4                  | 21                  | 0.98        | 0.979                | 0.576 (0.473, 0.671) | 3.1 (2.2, 4.2)                                                                   | 2 (0.2, 5.0)                                                                            | 32 (24, 45)                                                     |
|         |       | 10                          | 1.3                  | 10                  | 0.90        | 0.908                | 0.901 (0.859, 0.938) | 1.2 (0.7, 2.1)                                                                   | 9.1 (6.2, 11.9)                                                                         | 83 (48, 141)                                                    |
|         |       | 10                          | 1.3                  | 12                  | 0.95        | 0.947                | 0.864 (0.809, 0.915) | 1.2 (0.7, 2.0)                                                                   | 5.2 (2.7, 7.9)                                                                          | 86 (50, 146)                                                    |
|         |       | 10                          | 1.3                  | 15                  | 0.98        | 0.984                | 0.803 (0.721, 0.879) | 1.1 (0.6, 1.9)                                                                   | 1.6 (0.1, 3.8)                                                                          | 93 (54, 159)                                                    |
|         |       | 12                          | 0.8                  | 14                  | 0.90        | 0.901                | 0.744 (0.695, 0.786) | 0.6 (0.3, 1.2)                                                                   | 9.9 (7.5, 12.6)                                                                         | 168 (86, 338)                                                   |
|         | Men   | 12                          | 0.8                  | 18                  | 0.95        | 0.953                | 0.644 (0.570, 0.707) | 0.5 (0.3, 1.0)                                                                   | 4.7 (2.4, 7.8)                                                                          | 194 (98, 387)                                                   |
|         |       | 12                          | 0.8                  | 21                  | 0.98        | 0.978                | 0.572 (0.480, 0.655) | 0.5 (0.2, 0.9)                                                                   | 2.2 (0.4, 5.1)                                                                          | 218 (108, 444)                                                  |
|         |       | 12                          | 0.5                  | 8                   | 0.90        | 0.902                | 0.822 (0.781, 0.861) | 0.4 (0.2, 1.0)                                                                   | 9.7 (7.7, 12.1)                                                                         | 243 (104, 608)                                                  |
|         |       | 12                          | 0.5                  | 10                  | 0.95        | 0.946                | 0.779 (0.735, 0.819) | 0.4 (0.2, 0.9)                                                                   | 5.3 (3.6, 7.3)                                                                          | 257 (109, 640)                                                  |
|         |       | 12                          | 0.5                  | 12                  | 0.98        | 0.976                | 0.732 (0.677, 0.785) | 0.4 (0.1, 0.9)                                                                   | 2.4 (1.1, 4.0)                                                                          | 273 (116, 671)                                                  |
| Jamaica | Men   | 10                          | 2.5                  | 14                  | 0.90        | 0.902                | 0.747 (0.690, 0.795) | 1.9 (1.2, 2.8)                                                                   | 9.6 (6.8, 12.8)                                                                         | 53 (36, 80)                                                     |
|         |       | 10                          | 2.5                  | 18                  | 0.95        | 0.954                | 0.647 (0.564, 0.722) | 1.6 (1.1, 2.4)                                                                   | 4.5 (2.0, 7.8)                                                                          | 61 (41, 94)                                                     |
|         |       | 10                          | 2.5                  | 21                  | 0.98        | 0.979                | 0.576 (0.473, 0.671) | 1.5 (0.9, 2.2)                                                                   | 2.1 (0.2, 5.2)                                                                          | 69 (46, 106)                                                    |
|         | Women | 10                          | 0.5                  | 10                  | 0.90        | 0.908                | 0.901 (0.859, 0.938) | 0.5 (0.2, 1.0)                                                                   | 9.2 (6.3, 12.0)                                                                         | 218 (96, 537)                                                   |
|         |       | 10                          | 0.5                  | 12                  | 0.95        | 0.947                | 0.864 (0.809, 0.915) | 0.4 (0.2, 1.0)                                                                   | 5.3 (2.8, 8.0)                                                                          | 227 (100, 558)                                                  |
|         |       | 10                          | 0.5                  | 15                  | 0.98        | 0.984                | 0.803 (0.721, 0.879) | 0.4 (0.2, 0.9)                                                                   | 1.6 (0.1, 3.8)                                                                          | 244 (107, 607)                                                  |

| Country    | Sex   | Standard drink size (grams) | Prevalence (%) of AD | AUDIT cut-off score | Specificity | Specificity (actual) | Sensitivity (95% UI) | People who have AD and a positive AUDIT score [per 100 people screened] (95% UI) | People who do not have AD and a positive AUDIT score [per 100 people screened] (95% UI) | Number of people needed to screen to treat one AD case (95% UI) |
|------------|-------|-----------------------------|----------------------|---------------------|-------------|----------------------|----------------------|----------------------------------------------------------------------------------|-----------------------------------------------------------------------------------------|-----------------------------------------------------------------|
| Japan      | Men   | 10                          | 2.1                  | 14                  | 0.90        | 0.902                | 0.747 (0.690, 0.795) | 1.6 (1.0, 2.3)                                                                   | 9.6 (6.9, 12.9)                                                                         | 64 (43, 98)                                                     |
|            |       | 10                          | 2.1                  | 18                  | 0.95        | 0.954                | 0.647 (0.564, 0.722) | 1.4 (0.9, 2.1)                                                                   | 4.5 (2.0, 7.8)                                                                          | 74 (48, 115)                                                    |
|            |       | 10                          | 2.1                  | 21                  | 0.98        | 0.979                | 0.576 (0.473, 0.671) | 1.2 (0.8, 1.9)                                                                   | 2.1 (0.2, 5.2)                                                                          | 83 (53, 131)                                                    |
|            | Women | 10                          | 0.2                  | 10                  | 0.90        | 0.908                | 0.901 (0.859, 0.938) | 0.2 (<0.1, 0.6)                                                                  | 9.2 (6.3, 12.0)                                                                         | 617 (156, 2854)                                                 |
|            |       | 10                          | 0.2                  | 12                  | 0.95        | 0.947                | 0.864 (0.809, 0.915) | 0.2 (<0.1, 0.6)                                                                  | 5.3 (2.8, 8.0)                                                                          | 643 (162, 2978)                                                 |
|            |       | 10                          | 0.2                  | 15                  | 0.98        | 0.984                | 0.803 (0.721, 0.879) | 0.1 (<0.1, 0.6)                                                                  | 1.6 (0.1, 3.9)                                                                          | 692 (178, 3214)                                                 |
| Jordan     | Men   | 10                          | 0.3                  | 14                  | 0.90        | 0.902                | 0.747 (0.690, 0.795) | 0.2 (0.1, 0.7)                                                                   | 9.8 (7.0, 13.1)                                                                         | 406 (145, 1175)                                                 |
|            |       | 10                          | 0.3                  | 18                  | 0.95        | 0.954                | 0.647 (0.564, 0.722) | 0.2 (0.1, 0.6)                                                                   | 4.6 (2.0, 8.0)                                                                          | 468 (165, 1377)                                                 |
|            |       | 10                          | 0.3                  | 21                  | 0.98        | 0.979                | 0.576 (0.473, 0.671) | 0.2 (0.1, 0.5)                                                                   | 2.1 (0.2, 5.3)                                                                          | 526 (184, 1599)                                                 |
|            | Women | 10                          | 0.1                  | 10                  | 0.90        | 0.908                | 0.901 (0.859, 0.938) | 0.1 (<0.1, 0.7)                                                                  | 9.2 (6.3, 12.0)                                                                         | 1388 (148, 11654)                                               |
|            |       | 10                          | 0.1                  | 12                  | 0.95        | 0.947                | 0.864 (0.809, 0.915) | 0.1 (<0.1, 0.6)                                                                  | 5.3 (2.8, 8.0)                                                                          | 1446 (157, 12185)                                               |
|            |       | 10                          | 0.1                  | 15                  | 0.98        | 0.984                | 0.803 (0.721, 0.879) | 0.1 (<0.1, 0.6)                                                                  | 1.6 (0.1, 3.9)                                                                          | 1557 (172, 13208)                                               |
| Kazakhstan | Men   | 10                          | 5.5                  | 14                  | 0.90        | 0.902                | 0.747 (0.690, 0.795) | 4.1 (3.2, 5.3)                                                                   | 9.3 (6.7, 12.3)                                                                         | 24 (19, 32)                                                     |
|            |       | 10                          | 5.5                  | 18                  | 0.95        | 0.954                | 0.647 (0.564, 0.722) | 3.5 (2.7, 4.7)                                                                   | 4.4 (2.0, 7.5)                                                                          | 28 (21, 38)                                                     |
|            |       | 10                          | 5.5                  | 21                  | 0.98        | 0.979                | 0.576 (0.473, 0.671) | 3.1 (2.3, 4.2)                                                                   | 2 (0.2, 5.0)                                                                            | 32 (24, 44)                                                     |
|            | Women | 10                          | 1.4                  | 10                  | 0.90        | 0.908                | 0.901 (0.859, 0.938) | 1.2 (0.7, 2.0)                                                                   | 9.1 (6.2, 11.9)                                                                         | 82 (49, 141)                                                    |

| Country  | Sex   | Standard drink size (grams) | Prevalence (%) of AD | AUDIT cut-off score | Specificity | Specificity (actual) | Sensitivity (95% UI) | People who have AD and a positive AUDIT score [per 100 people screened] (95% UI) | People who do not have AD and a positive AUDIT score [per 100 people screened] (95% UI) | Number of people needed to screen to treat one AD case (95% UI) |
|----------|-------|-----------------------------|----------------------|---------------------|-------------|----------------------|----------------------|----------------------------------------------------------------------------------|-----------------------------------------------------------------------------------------|-----------------------------------------------------------------|
| Kenya    | Men   | 10                          | 1.4                  | 12                  | 0.95        | 0.947                | 0.864 (0.809, 0.915) | 1.2 (0.7, 2.0)                                                                   | 5.2 (2.7, 7.9)                                                                          | 86 (51, 148)                                                    |
|          |       | 10                          | 1.4                  | 15                  | 0.98        | 0.984                | 0.803 (0.721, 0.879) | 1.1 (0.6, 1.8)                                                                   | 1.6 (0.1, 3.8)                                                                          | 92 (55, 161)                                                    |
|          |       | 10                          | 2.4                  | 14                  | 0.90        | 0.902                | 0.747 (0.690, 0.795) | 1.8 (1.2, 2.7)                                                                   | 9.6 (6.8, 12.8)                                                                         | 55 (38, 83)                                                     |
|          |       | 10                          | 2.4                  | 18                  | 0.95        | 0.954                | 0.647 (0.564, 0.722) | 1.6 (1.0, 2.3)                                                                   | 4.5 (2.0, 7.8)                                                                          | 64 (43, 97)                                                     |
|          | Women | 10                          | 2.4                  | 21                  | 0.98        | 0.979                | 0.576 (0.473, 0.671) | 1.4 (0.9, 2.1)                                                                   | 2.1 (0.2, 5.1)                                                                          | 72 (47, 111)                                                    |
|          |       | 10                          | 0.4                  | 10                  | 0.90        | 0.908                | 0.901 (0.859, 0.938) | 0.3 (0.1, 1.0)                                                                   | 9.2 (6.3, 12.0)                                                                         | 300 (105, 767)                                                  |
|          |       | 10                          | 0.4                  | 12                  | 0.95        | 0.947                | 0.864 (0.809, 0.915) | 0.3 (0.1, 0.9)                                                                   | 5.3 (2.7, 8.0)                                                                          | 312 (110, 797)                                                  |
|          |       | 10                          | 0.4                  | 15                  | 0.98        | 0.984                | 0.803 (0.721, 0.879) | 0.3 (0.1, 0.8)                                                                   | 1.6 (0.1, 3.9)                                                                          | 336 (120, 864)                                                  |
| Kiribati | Men   | 10                          | 5.3                  | 14                  | 0.90        | 0.902                | 0.747 (0.690, 0.795) | 4 (3.0, 5.2)                                                                     | 9.3 (6.7, 12.4)                                                                         | 25 (19, 33)                                                     |
|          |       | 10                          | 5.3                  | 18                  | 0.95        | 0.954                | 0.647 (0.564, 0.722) | 3.4 (2.5, 4.6)                                                                   | 4.4 (1.9, 7.6)                                                                          | 29 (22, 40)                                                     |
|          |       | 10                          | 5.3                  | 21                  | 0.98        | 0.979                | 0.576 (0.473, 0.671) | 3.1 (2.2, 4.2)                                                                   | 2 (0.2, 5.0)                                                                            | 33 (24, 46)                                                     |
|          | Women | 10                          | 0.7                  | 10                  | 0.90        | 0.908                | 0.901 (0.859, 0.938) | 0.6 (0.3, 1.3)                                                                   | 9.2 (6.3, 11.9)                                                                         | 168 (79, 347)                                                   |
|          |       | 10                          | 0.7                  | 12                  | 0.95        | 0.947                | 0.864 (0.809, 0.915) | 0.6 (0.3, 1.2)                                                                   | 5.3 (2.7, 8.0)                                                                          | 175 (83, 363)                                                   |
|          |       | 10                          | 0.7                  | 15                  | 0.98        | 0.984                | 0.803 (0.721, 0.879) | 0.5 (0.3, 1.1)                                                                   | 1.6 (0.1, 3.9)                                                                          | 189 (90, 395)                                                   |
| Kuwait   | Men   | 10                          | 0.3                  | 14                  | 0.90        | 0.902                | 0.747 (0.690, 0.795) | 0.3 (0.1, 0.8)                                                                   | 9.8 (7.0, 13.1)                                                                         | 394 (130, 1327)                                                 |
|          |       | 10                          | 0.3                  | 18                  | 0.95        | 0.954                | 0.647 (0.564, 0.722) | 0.2 (0.1, 0.7)                                                                   | 4.6 (2.0, 8.0)                                                                          | 454 (150, 1529)                                                 |

| Country                          | Sex   | Standard drink size (grams) | Prevalence (%) of AD | AUDIT cut-off score | Specificity | Specificity (actual) | Sensitivity (95% UI) | People who have AD and a positive AUDIT score [per 100 people screened] (95% UI) | People who do not have AD and a positive AUDIT score [per 100 people screened] (95% UI) | Number of people needed to screen to treat one AD case (95% UI) |              |
|----------------------------------|-------|-----------------------------|----------------------|---------------------|-------------|----------------------|----------------------|----------------------------------------------------------------------------------|-----------------------------------------------------------------------------------------|-----------------------------------------------------------------|--------------|
| Kyrgyzstan                       | Women | 10                          | 0.3                  | 21                  | 0.98        | 0.979                | 0.576 (0.473, 0.671) | 0.2 (0.1, 0.6)                                                                   | 2.1 (0.2, 5.3)                                                                          | 511 (165, 1723)                                                 |              |
|                                  |       | 10                          | 0.1                  | 10                  | 0.90        | 0.908                | 0.901 (0.859, 0.938) | 0.1 (<0.1, 0.6)                                                                  | 9.2 (6.3, 12.0)                                                                         | 1388 (154, 11380)                                               |              |
|                                  |       | 10                          | 0.1                  | 12                  | 0.95        | 0.947                | 0.864 (0.809, 0.915) | 0.1 (<0.1, 0.6)                                                                  | 5.3 (2.7, 8.0)                                                                          | 1446 (160, 11621)                                               |              |
|                                  |       | 10                          | 0.1                  | 15                  | 0.98        | 0.984                | 0.803 (0.721, 0.879) | 0.1 (<0.1, 0.6)                                                                  | 1.6 (0.1, 3.9)                                                                          | 1557 (167, 12631)                                               |              |
|                                  | Men   | 10                          | 5.3                  | 14                  | 0.90        | 0.902                | 0.747 (0.690, 0.795) | 4 (3.0, 5.1)                                                                     | 9.3 (6.7, 12.4)                                                                         | 25 (19, 33)                                                     |              |
|                                  |       | 10                          | 5.3                  | 18                  | 0.95        | 0.954                | 0.647 (0.564, 0.722) | 3.5 (2.6, 4.5)                                                                   | 4.4 (2.0, 7.5)                                                                          | 29 (22, 39)                                                     |              |
|                                  |       | 10                          | 5.3                  | 21                  | 0.98        | 0.979                | 0.576 (0.473, 0.671) | 3.1 (2.2, 4.1)                                                                   | 2 (0.2, 5.0)                                                                            | 33 (24, 45)                                                     |              |
|                                  |       | Women                       | 10                   | 1.3                 | 10          | 0.90                 | 0.908                | 0.901 (0.859, 0.938)                                                             | 1.2 (0.7, 2.1)                                                                          | 9.1 (6.2, 11.9)                                                 | 83 (48, 139) |
|                                  |       |                             | 10                   | 1.3                 | 12          | 0.95                 | 0.947                | 0.864 (0.809, 0.915)                                                             | 1.2 (0.7, 2.0)                                                                          | 5.2 (2.7, 7.9)                                                  | 86 (50, 145) |
|                                  |       |                             | 10                   | 1.3                 | 15          | 0.98                 | 0.984                | 0.803 (0.721, 0.879)                                                             | 1.1 (0.6, 1.9)                                                                          | 1.6 (0.1, 3.8)                                                  | 93 (53, 155) |
| Lao People's Democratic Republic | Men   | 10                          | 5.0                  | 14                  | 0.90        | 0.902                | 0.747 (0.690, 0.795) | 3.7 (2.8, 4.9)                                                                   | 9.3 (6.7, 12.4)                                                                         | 27 (20, 35)                                                     |              |
|                                  |       | 10                          | 5.0                  | 18                  | 0.95        | 0.954                | 0.647 (0.564, 0.722) | 3.2 (2.4, 4.3)                                                                   | 4.4 (1.9, 7.6)                                                                          | 31 (23, 42)                                                     |              |
|                                  |       | 10                          | 5.0                  | 21                  | 0.98        | 0.979                | 0.576 (0.473, 0.671) | 2.9 (2.0, 3.9)                                                                   | 2 (0.2, 5.0)                                                                            | 35 (25, 49)                                                     |              |
|                                  | Women | 10                          | 0.7                  | 10                  | 0.90        | 0.908                | 0.901 (0.859, 0.938) | 0.6 (0.3, 1.3)                                                                   | 9.2 (6.3, 11.9)                                                                         | 168 (80, 358)                                                   |              |
|                                  |       | 10                          | 0.7                  | 12                  | 0.95        | 0.947                | 0.864 (0.809, 0.915) | 0.6 (0.3, 1.2)                                                                   | 5.3 (2.8, 8.0)                                                                          | 175 (83, 373)                                                   |              |
|                                  |       | 10                          | 0.7                  | 15                  | 0.98        | 0.984                | 0.803 (0.721, 0.879) | 0.5 (0.2, 1.1)                                                                   | 1.6 (0.1, 3.8)                                                                          | 189 (89, 407)                                                   |              |

| Country | Sex   | Standard drink size (grams) | Prevalence (%) of AD | AUDIT cut-off score | Specificity | Specificity (actual) | Sensitivity (95% UI) | People who have AD and a positive AUDIT score [per 100 people screened] (95% UI) | People who do not have AD and a positive AUDIT score [per 100 people screened] (95% UI) | Number of people needed to screen to treat one AD case (95% UI) |
|---------|-------|-----------------------------|----------------------|---------------------|-------------|----------------------|----------------------|----------------------------------------------------------------------------------|-----------------------------------------------------------------------------------------|-----------------------------------------------------------------|
| Latvia  | Men   | 12                          | 19.4                 | 14                  | 0.90        | 0.901                | 0.744 (0.695, 0.786) | 14.4 (12.3, 16.6)                                                                | 8 (6.1, 10.3)                                                                           | 7 (6, 8)                                                        |
|         |       | 12                          | 19.4                 | 18                  | 0.95        | 0.953                | 0.644 (0.570, 0.707) | 12.5 (10.4, 14.6)                                                                | 3.8 (1.9, 6.3)                                                                          | 8 (7, 10)                                                       |
|         |       | 12                          | 19.4                 | 21                  | 0.98        | 0.978                | 0.572 (0.480, 0.655) | 11.1 (8.9, 13.4)                                                                 | 1.8 (0.3, 4.1)                                                                          | 9 (7, 11)                                                       |
|         | Women | 12                          | 3.0                  | 8                   | 0.90        | 0.902                | 0.822 (0.781, 0.861) | 2.5 (1.7, 3.6)                                                                   | 9.5 (7.5, 11.8)                                                                         | 41 (28, 58)                                                     |
|         |       | 12                          | 3.0                  | 10                  | 0.95        | 0.946                | 0.779 (0.735, 0.819) | 2.3 (1.6, 3.4)                                                                   | 5.2 (3.5, 7.2)                                                                          | 43 (30, 61)                                                     |
|         |       | 12                          | 3.0                  | 12                  | 0.98        | 0.976                | 0.732 (0.677, 0.785) | 2.2 (1.5, 3.2)                                                                   | 2.3 (1.0, 4.0)                                                                          | 46 (32, 65)                                                     |
| Lebanon | Men   | 10                          | 7.4                  | 14                  | 0.90        | 0.902                | 0.747 (0.690, 0.795) | 5.5 (4.3, 7.0)                                                                   | 9.1 (6.5, 12.2)                                                                         | 18 (14, 23)                                                     |
|         |       | 10                          | 7.4                  | 18                  | 0.95        | 0.954                | 0.647 (0.564, 0.722) | 4.8 (3.6, 6.1)                                                                   | 4.3 (1.9, 7.4)                                                                          | 21 (16, 28)                                                     |
|         |       | 10                          | 7.4                  | 21                  | 0.98        | 0.979                | 0.576 (0.473, 0.671) | 4.2 (3.1, 5.5)                                                                   | 2 (0.2, 4.8)                                                                            | 24 (18, 32)                                                     |
|         | Women | 10                          | 0.0                  | 10                  | 0.90        | 0.908                | 0.901 (0.859, 0.938) | <0.1 (<0.1, 19.3)                                                                | 9.2 (5.9, 11.9)                                                                         | 22208 (5, 62602506)                                             |
|         |       | 10                          | 0.0                  | 12                  | 0.95        | 0.947                | 0.864 (0.809, 0.915) | <0.1 (<0.1, 18.5)                                                                | 5.3 (2.5, 8.0)                                                                          | 23140 (5, 64845234)                                             |
|         |       | 10                          | 0.0                  | 15                  | 0.98        | 0.984                | 0.803 (0.721, 0.879) | <0.1 (<0.1, 17.0)                                                                | 1.6 (0.1, 3.9)                                                                          | 24912 (6, 71064274)                                             |
| Lesotho | Men   | 10                          | 3.2                  | 14                  | 0.90        | 0.902                | 0.747 (0.690, 0.795) | 2.4 (1.6, 3.3)                                                                   | 9.5 (6.7, 12.7)                                                                         | 43 (30, 61)                                                     |
|         |       | 10                          | 3.2                  | 18                  | 0.95        | 0.954                | 0.647 (0.564, 0.722) | 2 (1.4, 2.9)                                                                     | 4.5 (2.0, 7.7)                                                                          | 49 (35, 71)                                                     |
|         |       | 10                          | 3.2                  | 21                  | 0.98        | 0.979                | 0.576 (0.473, 0.671) | 1.8 (1.2, 2.6)                                                                   | 2.1 (0.2, 5.1)                                                                          | 55 (39, 82)                                                     |
|         | Women | 10                          | 0.5                  | 10                  | 0.90        | 0.908                | 0.901 (0.859, 0.938) | 0.5 (0.2, 1.0)                                                                   | 9.2 (6.3, 12.0)                                                                         | 213 (96, 502)                                                   |

| Country   | Sex   | Standard drink size (grams) | Prevalence (%) of AD | AUDIT cut-off score | Specificity | Specificity (actual) | Sensitivity (95% UI) | People who have AD and a positive AUDIT score [per 100 people screened] (95% UI) | People who do not have AD and a positive AUDIT score [per 100 people screened] (95% UI) | Number of people needed to screen to treat one AD case (95% UI) |
|-----------|-------|-----------------------------|----------------------|---------------------|-------------|----------------------|----------------------|----------------------------------------------------------------------------------|-----------------------------------------------------------------------------------------|-----------------------------------------------------------------|
| Liberia   | Men   | 10                          | 0.5                  | 12                  | 0.95        | 0.947                | 0.864 (0.809, 0.915) | 0.5 (0.2, 1.0)                                                                   | 5.3 (2.8, 8.0)                                                                          | 222 (100, 524)                                                  |
|           |       | 10                          | 0.5                  | 15                  | 0.98        | 0.984                | 0.803 (0.721, 0.879) | 0.4 (0.2, 0.9)                                                                   | 1.6 (0.1, 3.8)                                                                          | 238 (110, 562)                                                  |
|           |       | 10                          | 3.1                  | 14                  | 0.90        | 0.902                | 0.747 (0.690, 0.795) | 2.3 (1.6, 3.2)                                                                   | 9.5 (6.8, 12.7)                                                                         | 43 (31, 63)                                                     |
|           | Women | 10                          | 3.1                  | 18                  | 0.95        | 0.954                | 0.647 (0.564, 0.722) | 2 (1.4, 2.8)                                                                     | 4.5 (2.0, 7.7)                                                                          | 49 (36, 74)                                                     |
|           |       | 10                          | 3.1                  | 21                  | 0.98        | 0.979                | 0.576 (0.473, 0.671) | 1.8 (1.2, 2.5)                                                                   | 2.1 (0.2, 5.1)                                                                          | 56 (39, 86)                                                     |
|           |       | 10                          | 0.5                  | 10                  | 0.90        | 0.908                | 0.901 (0.859, 0.938) | 0.5 (0.2, 1.1)                                                                   | 9.2 (6.3, 12.0)                                                                         | 215 (89, 520)                                                   |
| Libya     | Men   | 10                          | 0.5                  | 12                  | 0.95        | 0.947                | 0.864 (0.809, 0.915) | 0.4 (0.2, 1.1)                                                                   | 5.3 (2.8, 8.0)                                                                          | 224 (93, 547)                                                   |
|           |       | 10                          | 0.5                  | 15                  | 0.98        | 0.984                | 0.803 (0.721, 0.879) | 0.4 (0.2, 1.0)                                                                   | 1.6 (0.1, 3.9)                                                                          | 242 (100, 585)                                                  |
|           |       | 10                          | 0.3                  | 14                  | 0.90        | 0.902                | 0.747 (0.690, 0.795) | 0.3 (0.1, 0.7)                                                                   | 9.8 (7.0, 13.1)                                                                         | 394 (135, 1062)                                                 |
|           | Women | 10                          | 0.3                  | 18                  | 0.95        | 0.954                | 0.647 (0.564, 0.722) | 0.2 (0.1, 0.6)                                                                   | 4.6 (2.0, 8.0)                                                                          | 454 (157, 1257)                                                 |
|           |       | 10                          | 0.3                  | 21                  | 0.98        | 0.979                | 0.576 (0.473, 0.671) | 0.2 (0.1, 0.6)                                                                   | 2.1 (0.2, 5.3)                                                                          | 511 (177, 1426)                                                 |
|           |       | 10                          | 0.1                  | 10                  | 0.90        | 0.908                | 0.901 (0.859, 0.938) | 0.1 (<0.1, 0.6)                                                                  | 9.2 (6.3, 12.0)                                                                         | 1388 (162, 12103)                                               |
| Lithuania | Men   | 10                          | 0.1                  | 12                  | 0.95        | 0.947                | 0.864 (0.809, 0.915) | 0.1 (<0.1, 0.6)                                                                  | 5.3 (2.8, 8.0)                                                                          | 1446 (166, 12517)                                               |
|           |       | 10                          | 0.1                  | 15                  | 0.98        | 0.984                | 0.803 (0.721, 0.879) | 0.1 (<0.1, 0.6)                                                                  | 1.6 (0.1, 3.9)                                                                          | 1557 (176, 13406)                                               |
|           | Men   | 10                          | 8.9                  | 14                  | 0.90        | 0.902                | 0.747 (0.690, 0.795) | 6.6 (5.3, 8.1)                                                                   | 9 (6.4, 11.9)                                                                           | 15 (12, 19)                                                     |
|           |       | 10                          | 8.9                  | 18                  | 0.95        | 0.954                | 0.647 (0.564, 0.722) | 5.8 (4.4, 7.2)                                                                   | 4.2 (1.9, 7.3)                                                                          | 17 (14, 23)                                                     |



| Country    | Sex   | Standard drink size (grams) | Prevalence (%) of AD | AUDIT cut-off score | Specificity | Specificity (actual) | Sensitivity (95% UI) | People who have AD and a positive AUDIT score [per 100 people screened] (95% UI) | People who do not have AD and a positive AUDIT score [per 100 people screened] (95% UI) | Number of people needed to screen to treat one AD case (95% UI) |
|------------|-------|-----------------------------|----------------------|---------------------|-------------|----------------------|----------------------|----------------------------------------------------------------------------------|-----------------------------------------------------------------------------------------|-----------------------------------------------------------------|
| Luxembourg | Women | 10                          | 8.9                  | 21                  | 0.98        | 0.979                | 0.576 (0.473, 0.671) | 5.1 (3.8, 6.5)                                                                   | 1.9 (0.2, 4.8)                                                                          | 20 (15, 26)                                                     |
|            |       | 10                          | 1.6                  | 10                  | 0.90        | 0.908                | 0.901 (0.859, 0.938) | 1.4 (0.9, 2.3)                                                                   | 9.1 (6.2, 11.8)                                                                         | 69 (43, 111)                                                    |
|            |       | 10                          | 1.6                  | 12                  | 0.95        | 0.947                | 0.864 (0.809, 0.915) | 1.4 (0.9, 2.2)                                                                   | 5.2 (2.7, 7.9)                                                                          | 72 (45, 116)                                                    |
|            |       | 10                          | 1.6                  | 15                  | 0.98        | 0.984                | 0.803 (0.721, 0.879) | 1.3 (0.8, 2.1)                                                                   | 1.6 (0.1, 3.8)                                                                          | 78 (48, 126)                                                    |
|            |       | 12.8                        | 4.7                  | 14                  | 0.90        | 0.9                  | 0.743 (0.687, 0.790) | 3.5 (2.6, 4.6)                                                                   | 9.5 (7.2, 12.5)                                                                         | 29 (22, 38)                                                     |
|            | Men   | 12.8                        | 4.7                  | 18                  | 0.95        | 0.953                | 0.643 (0.562, 0.711) | 3 (2.2, 4.0)                                                                     | 4.5 (2.2, 7.7)                                                                          | 33 (25, 45)                                                     |
|            |       | 12.8                        | 4.7                  | 21                  | 0.98        | 0.978                | 0.571 (0.474, 0.658) | 2.7 (1.9, 3.6)                                                                   | 2.1 (0.4, 5.0)                                                                          | 37 (28, 52)                                                     |
|            |       | 12.8                        | 1.2                  | 7                   | 0.90        | 0.892                | 0.791 (0.728, 0.849) | 0.9 (0.5, 1.7)                                                                   | 10.6 (7.9, 14.1)                                                                        | 105 (60, 188)                                                   |
|            |       | 12.8                        | 1.2                  | 9                   | 0.95        | 0.941                | 0.745 (0.688, 0.799) | 0.9 (0.5, 1.6)                                                                   | 5.8 (3.9, 8.3)                                                                          | 112 (62, 200)                                                   |
|            |       | 12.8                        | 1.2                  | 12                  | 0.98        | 0.985                | 0.672 (0.605, 0.735) | 0.8 (0.5, 1.5)                                                                   | 1.5 (0.4, 3.3)                                                                          | 124 (69, 218)                                                   |
| Madagascar | Men   | 10                          | 1.6                  | 14                  | 0.90        | 0.902                | 0.747 (0.690, 0.795) | 1.2 (0.7, 1.9)                                                                   | 9.7 (6.9, 12.9)                                                                         | 84 (52, 139)                                                    |
|            |       | 10                          | 1.6                  | 18                  | 0.95        | 0.954                | 0.647 (0.564, 0.722) | 1 (0.6, 1.7)                                                                     | 4.6 (2.0, 7.8)                                                                          | 96 (61, 166)                                                    |
|            |       | 10                          | 1.6                  | 21                  | 0.98        | 0.979                | 0.576 (0.473, 0.671) | 0.9 (0.5, 1.5)                                                                   | 2.1 (0.2, 5.2)                                                                          | 108 (66, 192)                                                   |
|            | Women | 10                          | 0.2                  | 10                  | 0.90        | 0.908                | 0.901 (0.859, 0.938) | 0.2 (<0.1, 0.8)                                                                  | 9.2 (6.3, 12.0)                                                                         | 563 (132, 2277)                                                 |
|            |       | 10                          | 0.2                  | 12                  | 0.95        | 0.947                | 0.864 (0.809, 0.915) | 0.2 (<0.1, 0.7)                                                                  | 5.3 (2.8, 8.0)                                                                          | 587 (138, 2355)                                                 |
|            |       | 10                          | 0.2                  | 15                  | 0.98        | 0.984                | 0.803 (0.721, 0.879) | 0.2 (<0.1, 0.7)                                                                  | 1.6 (0.1, 3.8)                                                                          | 632 (148, 2536)                                                 |

| Country  | Sex   | Standard drink size (grams) | Prevalence (%) of AD | AUDIT cut-off score | Specificity | Specificity (actual) | Sensitivity (95% UI) | People who have AD and a positive AUDIT score [per 100 people screened] (95% UI) | People who do not have AD and a positive AUDIT score [per 100 people screened] (95% UI) | Number of people needed to screen to treat one AD case (95% UI) |
|----------|-------|-----------------------------|----------------------|---------------------|-------------|----------------------|----------------------|----------------------------------------------------------------------------------|-----------------------------------------------------------------------------------------|-----------------------------------------------------------------|
| Malawi   | Men   | 10                          | 2.1                  | 14                  | 0.90        | 0.902                | 0.747 (0.690, 0.795) | 1.6 (1.0, 2.4)                                                                   | 9.6 (6.9, 12.9)                                                                         | 63 (41, 95)                                                     |
|          |       | 10                          | 2.1                  | 18                  | 0.95        | 0.954                | 0.647 (0.564, 0.722) | 1.4 (0.9, 2.1)                                                                   | 4.5 (2.0, 7.8)                                                                          | 73 (47, 112)                                                    |
|          |       | 10                          | 2.1                  | 21                  | 0.98        | 0.979                | 0.576 (0.473, 0.671) | 1.2 (0.8, 1.9)                                                                   | 2.1 (0.2, 5.2)                                                                          | 82 (52, 128)                                                    |
|          | Women | 10                          | 0.3                  | 10                  | 0.90        | 0.908                | 0.901 (0.859, 0.938) | 0.3 (0.1, 0.8)                                                                   | 9.2 (6.3, 12.0)                                                                         | 375 (124, 1215)                                                 |
|          |       | 10                          | 0.3                  | 12                  | 0.95        | 0.947                | 0.864 (0.809, 0.915) | 0.3 (0.1, 0.8)                                                                   | 5.3 (2.8, 8.0)                                                                          | 390 (129, 1261)                                                 |
|          |       | 10                          | 0.3                  | 15                  | 0.98        | 0.984                | 0.803 (0.721, 0.879) | 0.2 (0.1, 0.7)                                                                   | 1.6 (0.1, 3.9)                                                                          | 420 (137, 1351)                                                 |
| Malaysia | Men   | 10                          | 1.8                  | 14                  | 0.90        | 0.902                | 0.747 (0.690, 0.795) | 1.4 (0.8, 2.1)                                                                   | 9.7 (6.9, 12.8)                                                                         | 74 (47, 120)                                                    |
|          |       | 10                          | 1.8                  | 18                  | 0.95        | 0.954                | 0.647 (0.564, 0.722) | 1.2 (0.7, 1.8)                                                                   | 4.5 (2.0, 7.9)                                                                          | 85 (55, 142)                                                    |
|          |       | 10                          | 1.8                  | 21                  | 0.98        | 0.979                | 0.576 (0.473, 0.671) | 1 (0.6, 1.7)                                                                     | 2.1 (0.2, 5.2)                                                                          | 96 (60, 161)                                                    |
|          | Women | 10                          | 0.4                  | 10                  | 0.90        | 0.908                | 0.901 (0.859, 0.938) | 0.3 (0.1, 0.9)                                                                   | 9.2 (6.3, 12.0)                                                                         | 315 (108, 918)                                                  |
|          |       | 10                          | 0.4                  | 12                  | 0.95        | 0.947                | 0.864 (0.809, 0.915) | 0.3 (0.1, 0.9)                                                                   | 5.3 (2.8, 8.0)                                                                          | 328 (112, 956)                                                  |
|          |       | 10                          | 0.4                  | 15                  | 0.98        | 0.984                | 0.803 (0.721, 0.879) | 0.3 (0.1, 0.8)                                                                   | 1.6 (0.1, 3.8)                                                                          | 353 (119, 1014)                                                 |
| Maldives | Men   | 10                          | 1.5                  | 14                  | 0.90        | 0.902                | 0.747 (0.690, 0.795) | 1.1 (0.7, 1.8)                                                                   | 9.7 (6.9, 12.9)                                                                         | 88 (54, 141)                                                    |
|          |       | 10                          | 1.5                  | 18                  | 0.95        | 0.954                | 0.647 (0.564, 0.722) | 1 (0.6, 1.6)                                                                     | 4.6 (2.0, 7.9)                                                                          | 101 (63, 164)                                                   |
|          |       | 10                          | 1.5                  | 21                  | 0.98        | 0.979                | 0.576 (0.473, 0.671) | 0.9 (0.5, 1.4)                                                                   | 2.1 (0.2, 5.2)                                                                          | 114 (70, 187)                                                   |
|          | Women | 10                          | 0.3                  | 10                  | 0.90        | 0.908                | 0.901 (0.859, 0.938) | 0.3 (0.1, 0.8)                                                                   | 9.2 (6.3, 12.0)                                                                         | 367 (123, 1131)                                                 |

| Country    | Sex   | Standard drink size (grams) | Prevalence (%) of AD | AUDIT cut-off score | Specificity | Specificity (actual) | Sensitivity (95% UI) | People who have AD and a positive AUDIT score [per 100 people screened] (95% UI) | People who do not have AD and a positive AUDIT score [per 100 people screened] (95% UI) | Number of people needed to screen to treat one AD case (95% UI) |
|------------|-------|-----------------------------|----------------------|---------------------|-------------|----------------------|----------------------|----------------------------------------------------------------------------------|-----------------------------------------------------------------------------------------|-----------------------------------------------------------------|
| Mali       | Men   | 10                          | 0.3                  | 12                  | 0.95        | 0.947                | 0.864 (0.809, 0.915) | 0.3 (0.1, 0.8)                                                                   | 5.3 (2.8, 8.0)                                                                          | 383 (127, 1174)                                                 |
|            |       | 10                          | 0.3                  | 15                  | 0.98        | 0.984                | 0.803 (0.721, 0.879) | 0.2 (0.1, 0.7)                                                                   | 1.6 (0.1, 3.9)                                                                          | 412 (134, 1289)                                                 |
|            |       | 10                          | 1.4                  | 14                  | 0.90        | 0.902                | 0.747 (0.690, 0.795) | 1 (0.6, 1.7)                                                                     | 9.7 (6.9, 12.9)                                                                         | 96 (57, 160)                                                    |
|            | Women | 10                          | 1.4                  | 18                  | 0.95        | 0.954                | 0.647 (0.564, 0.722) | 0.9 (0.5, 1.5)                                                                   | 4.6 (2.0, 7.9)                                                                          | 111 (66, 189)                                                   |
|            |       | 10                          | 1.4                  | 21                  | 0.98        | 0.979                | 0.576 (0.473, 0.671) | 0.8 (0.5, 1.4)                                                                   | 2.1 (0.2, 5.2)                                                                          | 125 (74, 214)                                                   |
|            |       | 10                          | 0.0                  | 10                  | 0.90        | 0.908                | 0.901 (0.859, 0.938) | <0.1 (<0.1, 1.0)                                                                 | 9.2 (6.3, 12.0)                                                                         | 3701 (102, 114119)                                              |
| Malta      | Men   | 10                          | 0.0                  | 12                  | 0.95        | 0.947                | 0.864 (0.809, 0.915) | <0.1 (<0.1, 0.9)                                                                 | 5.3 (2.8, 8.0)                                                                          | 3857 (107, 118061)                                              |
|            |       | 10                          | 0.0                  | 15                  | 0.98        | 0.984                | 0.803 (0.721, 0.879) | <0.1 (<0.1, 0.9)                                                                 | 1.6 (0.1, 3.9)                                                                          | 4152 (115, 126628)                                              |
|            |       | 9                           | 2.5                  | 14                  | 0.90        | 0.902                | 0.748 (0.675, 0.809) | 1.9 (1.3, 2.8)                                                                   | 9.5 (6.3, 13.3)                                                                         | 53 (36, 79)                                                     |
|            | Women | 9                           | 2.5                  | 18                  | 0.95        | 0.954                | 0.649 (0.550, 0.734) | 1.6 (1.1, 2.4)                                                                   | 4.5 (1.7, 8.1)                                                                          | 62 (41, 93)                                                     |
|            |       | 9                           | 2.5                  | 21                  | 0.98        | 0.979                | 0.578 (0.464, 0.683) | 1.4 (0.9, 2.2)                                                                   | 2 (0.1, 5.5)                                                                            | 69 (45, 108)                                                    |
|            |       | 9                           | 0.7                  | 11                  | 0.90        | 0.908                | 0.933 (0.877, 0.977) | 0.7 (0.3, 1.4)                                                                   | 9.1 (5.2, 13.0)                                                                         | 153 (74, 338)                                                   |
| Mauritania | Men   | 9                           | 0.7                  | 13                  | 0.95        | 0.946                | 0.901 (0.832, 0.959) | 0.6 (0.3, 1.3)                                                                   | 5.4 (2.1, 9.1)                                                                          | 158 (76, 351)                                                   |
|            |       | 9                           | 0.7                  | 16                  | 0.98        | 0.983                | 0.846 (0.744, 0.931) | 0.6 (0.3, 1.2)                                                                   | 1.7 (<0.1, 4.8)                                                                         | 169 (82, 375)                                                   |
| Mauritania | Men   | 10                          | 0.3                  | 14                  | 0.90        | 0.902                | 0.747 (0.690, 0.795) | 0.2 (0.1, 0.6)                                                                   | 9.8 (7.0, 13.1)                                                                         | 513 (159, 1652)                                                 |
|            |       | 10                          | 0.3                  | 18                  | 0.95        | 0.954                | 0.647 (0.564, 0.722) | 0.2 (0.1, 0.6)                                                                   | 4.6 (2.1, 7.9)                                                                          | 592 (180, 1921)                                                 |

| Country   | Sex   | Standard drink size (grams) | Prevalence (%) of AD | AUDIT cut-off score | Specificity | Specificity (actual) | Sensitivity (95% UI) | People who have AD and a positive AUDIT score [per 100 people screened] (95% UI) | People who do not have AD and a positive AUDIT score [per 100 people screened] (95% UI) | Number of people needed to screen to treat one AD case (95% UI) |               |
|-----------|-------|-----------------------------|----------------------|---------------------|-------------|----------------------|----------------------|----------------------------------------------------------------------------------|-----------------------------------------------------------------------------------------|-----------------------------------------------------------------|---------------|
| Mauritius | Women | 10                          | 0.3                  | 21                  | 0.98        | 0.979                | 0.576 (0.473, 0.671) | 0.2 (<0.1, 0.5)                                                                  | 2.1 (0.2, 5.3)                                                                          | 665 (197, 2192)                                                 |               |
|           |       | 10                          | 0.0                  | 10                  | 0.90        | 0.908                | 0.901 (0.859, 0.938) | <0.1 (<0.1, 0.7)                                                                 | 9.2 (6.3, 12.0)                                                                         | 2336 (143, 44770)                                               |               |
|           |       | 10                          | 0.0                  | 12                  | 0.95        | 0.947                | 0.864 (0.809, 0.915) | <0.1 (<0.1, 0.7)                                                                 | 5.3 (2.8, 8.0)                                                                          | 2434 (145, 46782)                                               |               |
|           |       | 10                          | 0.0                  | 15                  | 0.98        | 0.984                | 0.803 (0.721, 0.879) | <0.1 (<0.1, 0.7)                                                                 | 1.6 (0.1, 3.9)                                                                          | 2621 (153, 51042)                                               |               |
|           | Men   | 10                          | 3.3                  | 14                  | 0.90        | 0.902                | 0.747 (0.690, 0.795) | 2.5 (1.8, 3.6)                                                                   | 9.5 (6.8, 12.7)                                                                         | 40 (28, 56)                                                     |               |
|           |       | 10                          | 3.3                  | 18                  | 0.95        | 0.954                | 0.647 (0.564, 0.722) | 2.2 (1.5, 3.1)                                                                   | 4.5 (2.0, 7.7)                                                                          | 46 (32, 66)                                                     |               |
|           |       | 10                          | 3.3                  | 21                  | 0.98        | 0.979                | 0.576 (0.473, 0.671) | 1.9 (1.3, 2.8)                                                                   | 2 (0.2, 5.1)                                                                            | 52 (36, 76)                                                     |               |
|           |       | Women                       | 10                   | 0.6                 | 10          | 0.90                 | 0.908                | 0.901 (0.859, 0.938)                                                             | 0.5 (0.2, 1.2)                                                                          | 9.2 (6.3, 12.0)                                                 | 201 (87, 457) |
|           |       |                             | 10                   | 0.6                 | 12          | 0.95                 | 0.947                | 0.864 (0.809, 0.915)                                                             | 0.5 (0.2, 1.1)                                                                          | 5.3 (2.8, 8.0)                                                  | 210 (89, 478) |
|           |       |                             | 10                   | 0.6                 | 15          | 0.98                 | 0.984                | 0.803 (0.721, 0.879)                                                             | 0.4 (0.2, 1.0)                                                                          | 1.6 (0.1, 3.8)                                                  | 226 (96, 523) |
| Mexico    | Men   | 14                          | 2.3                  | 14                  | 0.90        | 0.899                | 0.741 (0.668, 0.800) | 1.7 (1.1, 2.5)                                                                   | 9.8 (6.7, 13.7)                                                                         | 59 (40, 91)                                                     |               |
|           |       | 14                          | 2.3                  | 18                  | 0.95        | 0.952                | 0.641 (0.549, 0.722) | 1.5 (0.9, 2.2)                                                                   | 4.7 (2.1, 8.4)                                                                          | 68 (46, 106)                                                    |               |
|           |       | 14                          | 2.3                  | 21                  | 0.98        | 0.978                | 0.569 (0.460, 0.667) | 1.3 (0.8, 2.0)                                                                   | 2.2 (0.3, 5.6)                                                                          | 76 (51, 121)                                                    |               |
|           | Women | 14                          | 0.3                  | 6                   | 0.90        | 0.889                | 0.73 (0.630, 0.821)  | 0.2 (0.1, 0.6)                                                                   | 11 (7.0, 16.3)                                                                          | 457 (162, 1437)                                                 |               |
|           |       | 14                          | 0.3                  | 8                   | 0.95        | 0.942                | 0.681 (0.587, 0.767) | 0.2 (0.1, 0.6)                                                                   | 5.8 (3.1, 9.6)                                                                          | 490 (173, 1558)                                                 |               |
|           |       | 14                          | 0.3                  | 10                  | 0.98        | 0.975                | 0.63 (0.535, 0.714)  | 0.2 (0.1, 0.5)                                                                   | 2.5 (0.7, 5.2)                                                                          | 529 (185, 1706)                                                 |               |

| Country                          | Sex   | Standard drink size (grams) | Prevalence (%) of AD | AUDIT cut-off score | Specificity | Specificity (actual) | Sensitivity (95% UI) | People who have AD and a positive AUDIT score [per 100 people screened] (95% UI) | People who do not have AD and a positive AUDIT score [per 100 people screened] (95% UI) | Number of people needed to screen to treat one AD case (95% UI) |
|----------------------------------|-------|-----------------------------|----------------------|---------------------|-------------|----------------------|----------------------|----------------------------------------------------------------------------------|-----------------------------------------------------------------------------------------|-----------------------------------------------------------------|
| Micronesia (Federated States of) | Men   | 10                          | 5.0                  | 14                  | 0.90        | 0.902                | 0.747 (0.690, 0.795) | 3.7 (2.8, 4.9)                                                                   | 9.3 (6.7, 12.5)                                                                         | 27 (20, 36)                                                     |
|                                  |       | 10                          | 5.0                  | 18                  | 0.95        | 0.954                | 0.647 (0.564, 0.722) | 3.2 (2.3, 4.3)                                                                   | 4.4 (2.0, 7.6)                                                                          | 31 (23, 43)                                                     |
|                                  |       | 10                          | 5.0                  | 21                  | 0.98        | 0.979                | 0.576 (0.473, 0.671) | 2.9 (2.0, 3.9)                                                                   | 2 (0.2, 5.0)                                                                            | 35 (26, 50)                                                     |
|                                  | Women | 10                          | 0.7                  | 10                  | 0.90        | 0.908                | 0.901 (0.859, 0.938) | 0.6 (0.3, 1.2)                                                                   | 9.2 (6.3, 12.0)                                                                         | 171 (84, 358)                                                   |
|                                  |       | 10                          | 0.7                  | 12                  | 0.95        | 0.947                | 0.864 (0.809, 0.915) | 0.6 (0.3, 1.1)                                                                   | 5.3 (2.8, 7.9)                                                                          | 178 (87, 375)                                                   |
|                                  |       | 10                          | 0.7                  | 15                  | 0.98        | 0.984                | 0.803 (0.721, 0.879) | 0.5 (0.2, 1.1)                                                                   | 1.6 (0.1, 3.8)                                                                          | 192 (94, 404)                                                   |
| Mongolia                         | Men   | 10                          | 4.8                  | 14                  | 0.90        | 0.902                | 0.747 (0.690, 0.795) | 3.6 (2.7, 4.7)                                                                   | 9.4 (6.7, 12.6)                                                                         | 28 (21, 38)                                                     |
|                                  |       | 10                          | 4.8                  | 18                  | 0.95        | 0.954                | 0.647 (0.564, 0.722) | 3.1 (2.2, 4.1)                                                                   | 4.4 (2.0, 7.6)                                                                          | 32 (24, 45)                                                     |
|                                  |       | 10                          | 4.8                  | 21                  | 0.98        | 0.979                | 0.576 (0.473, 0.671) | 2.8 (1.9, 3.8)                                                                   | 2 (0.2, 5.0)                                                                            | 36 (27, 51)                                                     |
|                                  | Women | 10                          | 0.9                  | 10                  | 0.90        | 0.908                | 0.901 (0.859, 0.938) | 0.8 (0.4, 1.6)                                                                   | 9.2 (6.3, 11.9)                                                                         | 122 (64, 228)                                                   |
|                                  |       | 10                          | 0.9                  | 12                  | 0.95        | 0.947                | 0.864 (0.809, 0.915) | 0.8 (0.4, 1.5)                                                                   | 5.3 (2.7, 7.9)                                                                          | 127 (67, 237)                                                   |
|                                  |       | 10                          | 0.9                  | 15                  | 0.98        | 0.984                | 0.803 (0.721, 0.879) | 0.7 (0.4, 1.4)                                                                   | 1.6 (0.1, 3.8)                                                                          | 137 (71, 257)                                                   |
| Montenegro                       | Men   | 10                          | 5.5                  | 14                  | 0.90        | 0.902                | 0.747 (0.690, 0.795) | 4.1 (3.1, 5.4)                                                                   | 9.3 (6.6, 12.3)                                                                         | 24 (19, 32)                                                     |
|                                  |       | 10                          | 5.5                  | 18                  | 0.95        | 0.954                | 0.647 (0.564, 0.722) | 3.6 (2.7, 4.7)                                                                   | 4.4 (1.9, 7.5)                                                                          | 28 (21, 38)                                                     |
|                                  |       | 10                          | 5.5                  | 21                  | 0.98        | 0.979                | 0.576 (0.473, 0.671) | 3.2 (2.3, 4.3)                                                                   | 2 (0.2, 5.0)                                                                            | 31 (23, 43)                                                     |
|                                  | Women | 10                          | 1.4                  | 10                  | 0.90        | 0.908                | 0.901 (0.859, 0.938) | 1.2 (0.7, 2.0)                                                                   | 9.1 (6.2, 11.9)                                                                         | 82 (49, 140)                                                    |

| Country    | Sex   | Standard drink size (grams) | Prevalence (%) of AD | AUDIT cut-off score | Specificity | Specificity (actual) | Sensitivity (95% UI) | People who have AD and a positive AUDIT score [per 100 people screened] (95% UI) | People who do not have AD and a positive AUDIT score [per 100 people screened] (95% UI) | Number of people needed to screen to treat one AD case (95% UI) |
|------------|-------|-----------------------------|----------------------|---------------------|-------------|----------------------|----------------------|----------------------------------------------------------------------------------|-----------------------------------------------------------------------------------------|-----------------------------------------------------------------|
| Morocco    | Men   | 10                          | 1.4                  | 12                  | 0.95        | 0.947                | 0.864 (0.809, 0.915) | 1.2 (0.7, 1.9)                                                                   | 5.2 (2.7, 7.9)                                                                          | 86 (52, 145)                                                    |
|            |       | 10                          | 1.4                  | 15                  | 0.98        | 0.984                | 0.803 (0.721, 0.879) | 1.1 (0.6, 1.8)                                                                   | 1.6 (0.1, 3.8)                                                                          | 92 (55, 156)                                                    |
|            |       | 10                          | 0.3                  | 14                  | 0.90        | 0.902                | 0.747 (0.690, 0.795) | 0.3 (0.1, 0.8)                                                                   | 9.8 (7.0, 13.1)                                                                         | 394 (131, 1107)                                                 |
|            |       | 10                          | 0.3                  | 18                  | 0.95        | 0.954                | 0.647 (0.564, 0.722) | 0.2 (0.1, 0.7)                                                                   | 4.6 (2.0, 8.0)                                                                          | 454 (147, 1302)                                                 |
|            | Women | 10                          | 0.3                  | 21                  | 0.98        | 0.979                | 0.576 (0.473, 0.671) | 0.2 (0.1, 0.6)                                                                   | 2.1 (0.2, 5.3)                                                                          | 511 (166, 1465)                                                 |
|            |       | 10                          | 0.1                  | 10                  | 0.90        | 0.908                | 0.901 (0.859, 0.938) | 0.1 (<0.1, 0.7)                                                                  | 9.2 (6.3, 12.0)                                                                         | 1388 (153, 11600)                                               |
|            |       | 10                          | 0.1                  | 12                  | 0.95        | 0.947                | 0.864 (0.809, 0.915) | 0.1 (<0.1, 0.6)                                                                  | 5.3 (2.7, 8.0)                                                                          | 1446 (161, 12107)                                               |
|            |       | 10                          | 0.1                  | 15                  | 0.98        | 0.984                | 0.803 (0.721, 0.879) | 0.1 (<0.1, 0.6)                                                                  | 1.6 (0.1, 3.9)                                                                          | 1557 (173, 13075)                                               |
| Mozambique | Men   | 10                          | 2.0                  | 14                  | 0.90        | 0.902                | 0.747 (0.690, 0.795) | 1.5 (1.0, 2.3)                                                                   | 9.6 (6.9, 12.9)                                                                         | 67 (43, 105)                                                    |
|            |       | 10                          | 2.0                  | 18                  | 0.95        | 0.954                | 0.647 (0.564, 0.722) | 1.3 (0.8, 2.0)                                                                   | 4.5 (2.0, 7.9)                                                                          | 77 (49, 123)                                                    |
|            |       | 10                          | 2.0                  | 21                  | 0.98        | 0.979                | 0.576 (0.473, 0.671) | 1.2 (0.7, 1.8)                                                                   | 2.1 (0.2, 5.2)                                                                          | 86 (54, 141)                                                    |
|            |       | 10                          | 0.3                  | 10                  | 0.90        | 0.908                | 0.901 (0.859, 0.938) | 0.2 (0.1, 0.8)                                                                   | 9.2 (6.3, 12.0)                                                                         | 409 (120, 1256)                                                 |
|            | Women | 10                          | 0.3                  | 12                  | 0.95        | 0.947                | 0.864 (0.809, 0.915) | 0.2 (0.1, 0.8)                                                                   | 5.3 (2.8, 8.0)                                                                          | 426 (126, 1316)                                                 |
|            |       | 10                          | 0.3                  | 15                  | 0.98        | 0.984                | 0.803 (0.721, 0.879) | 0.2 (0.1, 0.7)                                                                   | 1.6 (0.1, 3.9)                                                                          | 459 (142, 1433)                                                 |
|            |       | 10                          | 1.3                  | 14                  | 0.90        | 0.902                | 0.747 (0.690, 0.795) | 0.9 (0.5, 1.7)                                                                   | 9.7 (6.9, 13.0)                                                                         | 107 (60, 189)                                                   |
|            |       | 10                          | 1.3                  | 18                  | 0.95        | 0.954                | 0.647 (0.564, 0.722) | 0.8 (0.5, 1.5)                                                                   | 4.6 (2.0, 7.9)                                                                          | 123 (68, 218)                                                   |
| Myanmar    | Men   | 10                          | 1.3                  | 14                  | 0.90        | 0.902                | 0.747 (0.690, 0.795) | 0.9 (0.5, 1.7)                                                                   | 9.7 (6.9, 13.0)                                                                         | 107 (60, 189)                                                   |
|            |       | 10                          | 1.3                  | 18                  | 0.95        | 0.954                | 0.647 (0.564, 0.722) | 0.8 (0.5, 1.5)                                                                   | 4.6 (2.0, 7.9)                                                                          | 123 (68, 218)                                                   |

| Country | Sex   | Standard drink size (grams) | Prevalence (%) of AD | AUDIT cut-off score | Specificity | Specificity (actual) | Sensitivity (95% UI) | People who have AD and a positive AUDIT score [per 100 people screened] (95% UI) | People who do not have AD and a positive AUDIT score [per 100 people screened] (95% UI) | Number of people needed to screen to treat one AD case (95% UI) |
|---------|-------|-----------------------------|----------------------|---------------------|-------------|----------------------|----------------------|----------------------------------------------------------------------------------|-----------------------------------------------------------------------------------------|-----------------------------------------------------------------|
| Nauru   | Women | 10                          | 1.3                  | 21                  | 0.98        | 0.979                | 0.576 (0.473, 0.671) | 0.7 (0.4, 1.3)                                                                   | 2.1 (0.2, 5.3)                                                                          | 138 (76, 251)                                                   |
|         |       | 10                          | 0.2                  | 10                  | 0.90        | 0.908                | 0.901 (0.859, 0.938) | 0.2 (0.1, 0.7)                                                                   | 9.2 (6.3, 12.0)                                                                         | 480 (139, 1664)                                                 |
|         |       | 10                          | 0.2                  | 12                  | 0.95        | 0.947                | 0.864 (0.809, 0.915) | 0.2 (0.1, 0.7)                                                                   | 5.3 (2.8, 8.0)                                                                          | 500 (146, 1745)                                                 |
|         |       | 10                          | 0.2                  | 15                  | 0.98        | 0.984                | 0.803 (0.721, 0.879) | 0.2 (0.1, 0.6)                                                                   | 1.6 (0.1, 3.9)                                                                          | 539 (158, 1870)                                                 |
|         |       | 10                          | 5.3                  | 14                  | 0.90        | 0.902                | 0.747 (0.690, 0.795) | 4 (3.0, 5.2)                                                                     | 9.3 (6.6, 12.4)                                                                         | 25 (19, 33)                                                     |
|         | Men   | 10                          | 5.3                  | 18                  | 0.95        | 0.954                | 0.647 (0.564, 0.722) | 3.4 (2.6, 4.6)                                                                   | 4.4 (1.9, 7.5)                                                                          | 29 (22, 39)                                                     |
|         |       | 10                          | 5.3                  | 21                  | 0.98        | 0.979                | 0.576 (0.473, 0.671) | 3.1 (2.2, 4.2)                                                                   | 2 (0.2, 5.0)                                                                            | 33 (24, 45)                                                     |
|         |       | 10                          | 0.7                  | 10                  | 0.90        | 0.908                | 0.901 (0.859, 0.938) | 0.6 (0.3, 1.3)                                                                   | 9.2 (6.3, 11.9)                                                                         | 168 (79, 353)                                                   |
|         |       | 10                          | 0.7                  | 12                  | 0.95        | 0.947                | 0.864 (0.809, 0.915) | 0.6 (0.3, 1.2)                                                                   | 5.3 (2.7, 7.9)                                                                          | 175 (82, 368)                                                   |
|         |       | 10                          | 0.7                  | 15                  | 0.98        | 0.984                | 0.803 (0.721, 0.879) | 0.5 (0.2, 1.1)                                                                   | 1.6 (0.1, 3.8)                                                                          | 189 (89, 402)                                                   |
| Nepal   | Men   | 10                          | 1.2                  | 14                  | 0.90        | 0.902                | 0.747 (0.690, 0.795) | 0.9 (0.5, 1.5)                                                                   | 9.7 (7.0, 13.0)                                                                         | 112 (65, 201)                                                   |
|         |       | 10                          | 1.2                  | 18                  | 0.95        | 0.954                | 0.647 (0.564, 0.722) | 0.8 (0.4, 1.3)                                                                   | 4.6 (2.0, 7.9)                                                                          | 130 (76, 231)                                                   |
|         |       | 10                          | 1.2                  | 21                  | 0.98        | 0.979                | 0.576 (0.473, 0.671) | 0.7 (0.4, 1.2)                                                                   | 2.1 (0.2, 5.2)                                                                          | 146 (83, 261)                                                   |
|         | Women | 10                          | 0.2                  | 10                  | 0.90        | 0.908                | 0.901 (0.859, 0.938) | 0.2 (0.1, 0.7)                                                                   | 9.2 (6.3, 12.0)                                                                         | 484 (144, 1743)                                                 |
|         |       | 10                          | 0.2                  | 12                  | 0.95        | 0.947                | 0.864 (0.809, 0.915) | 0.2 (0.1, 0.7)                                                                   | 5.3 (2.8, 8.0)                                                                          | 505 (149, 1827)                                                 |
|         |       | 10                          | 0.2                  | 15                  | 0.98        | 0.984                | 0.803 (0.721, 0.879) | 0.2 (<0.1, 0.6)                                                                  | 1.6 (0.1, 3.8)                                                                          | 543 (160, 1984)                                                 |

| Country     | Sex   | Standard drink size (grams) | Prevalence (%) of AD | AUDIT cut-off score | Specificity | Specificity (actual) | Sensitivity (95% UI) | People who have AD and a positive AUDIT score [per 100 people screened] (95% UI) | People who do not have AD and a positive AUDIT score [per 100 people screened] (95% UI) | Number of people needed to screen to treat one AD case (95% UI) |
|-------------|-------|-----------------------------|----------------------|---------------------|-------------|----------------------|----------------------|----------------------------------------------------------------------------------|-----------------------------------------------------------------------------------------|-----------------------------------------------------------------|
| Netherlands | Men   | 10                          | 0.9                  | 14                  | 0.90        | 0.902                | 0.747 (0.690, 0.795) | 0.7 (0.3, 1.3)                                                                   | 9.7 (7.0, 13.0)                                                                         | 149 (77, 289)                                                   |
|             |       | 10                          | 0.9                  | 18                  | 0.95        | 0.954                | 0.647 (0.564, 0.722) | 0.6 (0.3, 1.1)                                                                   | 4.6 (2.0, 7.9)                                                                          | 172 (90, 336)                                                   |
|             |       | 10                          | 0.9                  | 21                  | 0.98        | 0.979                | 0.576 (0.473, 0.671) | 0.5 (0.3, 1.0)                                                                   | 2.1 (0.2, 5.2)                                                                          | 193 (101, 388)                                                  |
|             | Women | 10                          | 0.4                  | 10                  | 0.90        | 0.908                | 0.901 (0.859, 0.938) | 0.4 (0.1, 0.9)                                                                   | 9.2 (6.3, 12.0)                                                                         | 278 (107, 733)                                                  |
|             |       | 10                          | 0.4                  | 12                  | 0.95        | 0.947                | 0.864 (0.809, 0.915) | 0.3 (0.1, 0.9)                                                                   | 5.3 (2.7, 8.0)                                                                          | 289 (112, 761)                                                  |
|             |       | 10                          | 0.4                  | 15                  | 0.98        | 0.984                | 0.803 (0.721, 0.879) | 0.3 (0.1, 0.8)                                                                   | 1.6 (0.1, 3.9)                                                                          | 311 (121, 811)                                                  |
| New Zealand | Men   | 10                          | 1.9                  | 14                  | 0.90        | 0.902                | 0.747 (0.690, 0.795) | 1.4 (0.9, 2.2)                                                                   | 9.6 (6.9, 12.9)                                                                         | 72 (46, 110)                                                    |
|             |       | 10                          | 1.9                  | 18                  | 0.95        | 0.954                | 0.647 (0.564, 0.722) | 1.2 (0.8, 1.9)                                                                   | 4.5 (2.0, 7.9)                                                                          | 83 (52, 127)                                                    |
|             |       | 10                          | 1.9                  | 21                  | 0.98        | 0.979                | 0.576 (0.473, 0.671) | 1.1 (0.7, 1.7)                                                                   | 2.1 (0.2, 5.2)                                                                          | 93 (58, 145)                                                    |
|             | Women | 10                          | 0.9                  | 10                  | 0.90        | 0.908                | 0.901 (0.859, 0.938) | 0.8 (0.4, 1.5)                                                                   | 9.2 (6.3, 11.9)                                                                         | 128 (68, 248)                                                   |
|             |       | 10                          | 0.9                  | 12                  | 0.95        | 0.947                | 0.864 (0.809, 0.915) | 0.8 (0.4, 1.4)                                                                   | 5.3 (2.7, 8.0)                                                                          | 133 (70, 256)                                                   |
|             |       | 10                          | 0.9                  | 15                  | 0.98        | 0.984                | 0.803 (0.721, 0.879) | 0.7 (0.4, 1.3)                                                                   | 1.6 (0.1, 3.8)                                                                          | 143 (75, 278)                                                   |
| Nicaragua   | Men   | 10                          | 3.9                  | 14                  | 0.90        | 0.902                | 0.747 (0.690, 0.795) | 2.9 (2.1, 4.0)                                                                   | 9.4 (6.7, 12.6)                                                                         | 34 (25, 47)                                                     |
|             |       | 10                          | 3.9                  | 18                  | 0.95        | 0.954                | 0.647 (0.564, 0.722) | 2.5 (1.8, 3.6)                                                                   | 4.4 (2.0, 7.7)                                                                          | 39 (28, 56)                                                     |
|             |       | 10                          | 3.9                  | 21                  | 0.98        | 0.979                | 0.576 (0.473, 0.671) | 2.3 (1.5, 3.2)                                                                   | 2 (0.2, 5.1)                                                                            | 44 (31, 66)                                                     |
|             | Women | 10                          | 1.8                  | 10                  | 0.90        | 0.908                | 0.901 (0.859, 0.938) | 1.6 (1.1, 2.5)                                                                   | 9.1 (6.2, 11.8)                                                                         | 61 (39, 93)                                                     |



| Country | Sex   | Standard drink size (grams) | Prevalence (%) of AD | AUDIT cut-off score | Specificity | Specificity (actual) | Sensitivity (95% UI) | People who have AD and a positive AUDIT score [per 100 people screened] (95% UI) | People who do not have AD and a positive AUDIT score [per 100 people screened] (95% UI) | Number of people needed to screen to treat one AD case (95% UI) |
|---------|-------|-----------------------------|----------------------|---------------------|-------------|----------------------|----------------------|----------------------------------------------------------------------------------|-----------------------------------------------------------------------------------------|-----------------------------------------------------------------|
| Niger   | Men   | 10                          | 1.8                  | 12                  | 0.95        | 0.947                | 0.864 (0.809, 0.915) | 1.6 (1.0, 2.5)                                                                   | 5.2 (2.7, 7.9)                                                                          | 63 (41, 97)                                                     |
|         |       | 10                          | 1.8                  | 15                  | 0.98        | 0.984                | 0.803 (0.721, 0.879) | 1.5 (0.9, 2.3)                                                                   | 1.6 (0.1, 3.8)                                                                          | 68 (43, 107)                                                    |
|         |       | 10                          | 1.4                  | 14                  | 0.90        | 0.902                | 0.747 (0.690, 0.795) | 1 (0.6, 1.8)                                                                     | 9.7 (6.9, 13.0)                                                                         | 96 (57, 167)                                                    |
|         | Women | 10                          | 1.4                  | 18                  | 0.95        | 0.954                | 0.647 (0.564, 0.722) | 0.9 (0.5, 1.5)                                                                   | 4.6 (2.0, 7.9)                                                                          | 110 (65, 192)                                                   |
|         |       | 10                          | 1.4                  | 21                  | 0.98        | 0.979                | 0.576 (0.473, 0.671) | 0.8 (0.5, 1.4)                                                                   | 2.1 (0.2, 5.2)                                                                          | 124 (73, 218)                                                   |
|         |       | 10                          | 0.0                  | 10                  | 0.90        | 0.908                | 0.901 (0.859, 0.938) | <0.1 (<0.1, 1.0)                                                                 | 9.2 (6.3, 12.0)                                                                         | 3701 (96, 96315)                                                |
| Nigeria | Men   | 10                          | 0.0                  | 12                  | 0.95        | 0.947                | 0.864 (0.809, 0.915) | <0.1 (<0.1, 1.0)                                                                 | 5.3 (2.8, 8.0)                                                                          | 3857 (100, 101570)                                              |
|         |       | 10                          | 0.0                  | 15                  | 0.98        | 0.984                | 0.803 (0.721, 0.879) | <0.1 (<0.1, 0.9)                                                                 | 1.6 (0.1, 3.9)                                                                          | 4152 (108, 107272)                                              |
|         |       | 10                          | 0.2                  | 14                  | 0.90        | 0.902                | 0.747 (0.690, 0.795) | 0.1 (<0.1, 0.5)                                                                  | 9.8 (7.0, 13.1)                                                                         | 698 (186, 3045)                                                 |
|         | Women | 10                          | 0.2                  | 18                  | 0.95        | 0.954                | 0.647 (0.564, 0.722) | 0.1 (<0.1, 0.5)                                                                  | 4.6 (2.1, 7.9)                                                                          | 806 (213, 3523)                                                 |
|         |       | 10                          | 0.2                  | 21                  | 0.98        | 0.979                | 0.576 (0.473, 0.671) | 0.1 (<0.1, 0.4)                                                                  | 2.1 (0.2, 5.3)                                                                          | 906 (238, 4040)                                                 |
|         |       | 10                          | 0.0                  | 10                  | 0.90        | 0.908                | 0.901 (0.859, 0.938) | <0.1 (<0.1, 9.0)                                                                 | 9.2 (6.1, 11.9)                                                                         | 18338 (11, 36459220)                                            |
| Niue    | Men   | 10                          | 0.0                  | 12                  | 0.95        | 0.947                | 0.864 (0.809, 0.915) | <0.1 (<0.1, 8.8)                                                                 | 5.3 (2.6, 8.0)                                                                          | 19108 (11, 38149173)                                            |
|         |       | 10                          | 0.0                  | 15                  | 0.98        | 0.984                | 0.803 (0.721, 0.879) | <0.1 (<0.1, 8.2)                                                                 | 1.6 (0.1, 3.9)                                                                          | 20571 (12, 41508419)                                            |
| Niue    | Men   | 10                          | 5.2                  | 14                  | 0.90        | 0.902                | 0.747 (0.690, 0.795) | 3.9 (3.0, 5.1)                                                                   | 9.3 (6.6, 12.4)                                                                         | 26 (20, 33)                                                     |
|         |       | 10                          | 5.2                  | 18                  | 0.95        | 0.954                | 0.647 (0.564, 0.722) | 3.4 (2.6, 4.5)                                                                   | 4.4 (2.0, 7.5)                                                                          | 29 (22, 39)                                                     |

| Country | Sex   | Standard drink size (grams) | Prevalence (%) of AD | AUDIT cut-off score | Specificity | Specificity (actual) | Sensitivity (95% UI) | People who have AD and a positive AUDIT score [per 100 people screened] (95% UI) | People who do not have AD and a positive AUDIT score [per 100 people screened] (95% UI) | Number of people needed to screen to treat one AD case (95% UI) |
|---------|-------|-----------------------------|----------------------|---------------------|-------------|----------------------|----------------------|----------------------------------------------------------------------------------|-----------------------------------------------------------------------------------------|-----------------------------------------------------------------|
| Norway  | Women | 10                          | 5.2                  | 21                  | 0.98        | 0.979                | 0.576 (0.473, 0.671) | 3 (2.2, 4.1)                                                                     | 2 (0.2, 5.0)                                                                            | 33 (24, 45)                                                     |
|         |       | 10                          | 0.7                  | 10                  | 0.90        | 0.908                | 0.901 (0.859, 0.938) | 0.6 (0.3, 1.2)                                                                   | 9.2 (6.3, 11.9)                                                                         | 168 (82, 360)                                                   |
|         |       | 10                          | 0.7                  | 12                  | 0.95        | 0.947                | 0.864 (0.809, 0.915) | 0.6 (0.3, 1.2)                                                                   | 5.3 (2.8, 8.0)                                                                          | 175 (84, 375)                                                   |
|         |       | 10                          | 0.7                  | 15                  | 0.98        | 0.984                | 0.803 (0.721, 0.879) | 0.5 (0.2, 1.1)                                                                   | 1.6 (0.1, 3.8)                                                                          | 189 (91, 405)                                                   |
|         |       | 13.5                        | 6.1                  | 14                  | 0.90        | 0.9                  | 0.742 (0.677, 0.795) | 4.5 (3.5, 5.8)                                                                   | 9.4 (6.8, 12.9)                                                                         | 22 (17, 29)                                                     |
|         | Men   | 13.5                        | 6.1                  | 18                  | 0.95        | 0.952                | 0.642 (0.553, 0.716) | 3.9 (2.9, 5.1)                                                                   | 4.5 (2.1, 7.9)                                                                          | 26 (20, 34)                                                     |
|         |       | 13.5                        | 6.1                  | 21                  | 0.98        | 0.978                | 0.57 (0.463, 0.663)  | 3.5 (2.5, 4.6)                                                                   | 2.1 (0.3, 5.2)                                                                          | 29 (22, 40)                                                     |
|         |       | 13.5                        | 1.8                  | 7                   | 0.90        | 0.908                | 0.742 (0.661, 0.818) | 1.3 (0.8, 2.2)                                                                   | 9 (5.9, 13.0)                                                                           | 75 (45, 122)                                                    |
|         |       | 13.5                        | 1.8                  | 9                   | 0.95        | 0.953                | 0.694 (0.615, 0.765) | 1.2 (0.8, 2.1)                                                                   | 4.6 (2.5, 7.5)                                                                          | 80 (49, 130)                                                    |
|         |       | 13.5                        | 1.8                  | 11                  | 0.98        | 0.982                | 0.643 (0.562, 0.719) | 1.2 (0.7, 1.9)                                                                   | 1.8 (0.5, 3.9)                                                                          | 86 (52, 140)                                                    |
| Oman    | Men   | 10                          | 0.3                  | 14                  | 0.90        | 0.902                | 0.747 (0.690, 0.795) | 0.2 (0.1, 0.7)                                                                   | 9.8 (7.0, 13.1)                                                                         | 406 (141, 1163)                                                 |
|         |       | 10                          | 0.3                  | 18                  | 0.95        | 0.954                | 0.647 (0.564, 0.722) | 0.2 (0.1, 0.6)                                                                   | 4.6 (2.0, 8.0)                                                                          | 468 (161, 1361)                                                 |
|         |       | 10                          | 0.3                  | 21                  | 0.98        | 0.979                | 0.576 (0.473, 0.671) | 0.2 (0.1, 0.6)                                                                   | 2.1 (0.2, 5.3)                                                                          | 526 (176, 1559)                                                 |
|         | Women | 10                          | 0.1                  | 10                  | 0.90        | 0.908                | 0.901 (0.859, 0.938) | 0.1 (<0.1, 0.7)                                                                  | 9.2 (6.3, 12.0)                                                                         | 1234 (137, 9693)                                                |
|         |       | 10                          | 0.1                  | 12                  | 0.95        | 0.947                | 0.864 (0.809, 0.915) | 0.1 (<0.1, 0.7)                                                                  | 5.3 (2.8, 8.0)                                                                          | 1286 (143, 10196)                                               |
|         |       | 10                          | 0.1                  | 15                  | 0.98        | 0.984                | 0.803 (0.721, 0.879) | 0.1 (<0.1, 0.6)                                                                  | 1.6 (0.1, 3.9)                                                                          | 1384 (155, 10971)                                               |

| Country  | Sex   | Standard drink size (grams) | Prevalence (%) of AD | AUDIT cut-off score | Specificity | Specificity (actual) | Sensitivity (95% UI) | People who have AD and a positive AUDIT score [per 100 people screened] (95% UI) | People who do not have AD and a positive AUDIT score [per 100 people screened] (95% UI) | Number of people needed to screen to treat one AD case (95% UI) |
|----------|-------|-----------------------------|----------------------|---------------------|-------------|----------------------|----------------------|----------------------------------------------------------------------------------|-----------------------------------------------------------------------------------------|-----------------------------------------------------------------|
| Pakistan | Men   | 10                          | 0.3                  | 14                  | 0.90        | 0.902                | 0.747 (0.690, 0.795) | 0.2 (0.1, 0.7)                                                                   | 9.8 (7.0, 13.1)                                                                         | 406 (135, 1187)                                                 |
|          |       | 10                          | 0.3                  | 18                  | 0.95        | 0.954                | 0.647 (0.564, 0.722) | 0.2 (0.1, 0.6)                                                                   | 4.6 (2.0, 7.9)                                                                          | 468 (154, 1375)                                                 |
|          |       | 10                          | 0.3                  | 21                  | 0.98        | 0.979                | 0.576 (0.473, 0.671) | 0.2 (0.1, 0.6)                                                                   | 2.1 (0.2, 5.3)                                                                          | 526 (169, 1578)                                                 |
|          | Women | 10                          | 0.1                  | 10                  | 0.90        | 0.908                | 0.901 (0.859, 0.938) | 0.1 (<0.1, 0.7)                                                                  | 9.2 (6.3, 12.0)                                                                         | 1388 (143, 12527)                                               |
|          |       | 10                          | 0.1                  | 12                  | 0.95        | 0.947                | 0.864 (0.809, 0.915) | 0.1 (<0.1, 0.7)                                                                  | 5.3 (2.8, 8.0)                                                                          | 1446 (150, 13214)                                               |
|          |       | 10                          | 0.1                  | 15                  | 0.98        | 0.984                | 0.803 (0.721, 0.879) | 0.1 (<0.1, 0.6)                                                                  | 1.6 (0.1, 3.9)                                                                          | 1557 (162, 14358)                                               |
| Palau    | Men   | 10                          | 5.3                  | 14                  | 0.90        | 0.902                | 0.747 (0.690, 0.795) | 4 (3.1, 5.2)                                                                     | 9.3 (6.7, 12.4)                                                                         | 25 (19, 33)                                                     |
|          |       | 10                          | 5.3                  | 18                  | 0.95        | 0.954                | 0.647 (0.564, 0.722) | 3.4 (2.6, 4.6)                                                                   | 4.4 (2.0, 7.6)                                                                          | 29 (22, 39)                                                     |
|          |       | 10                          | 5.3                  | 21                  | 0.98        | 0.979                | 0.576 (0.473, 0.671) | 3.1 (2.2, 4.1)                                                                   | 2 (0.2, 5.0)                                                                            | 33 (24, 45)                                                     |
|          | Women | 10                          | 0.7                  | 10                  | 0.90        | 0.908                | 0.901 (0.859, 0.938) | 0.6 (0.3, 1.2)                                                                   | 9.2 (6.3, 11.9)                                                                         | 168 (80, 367)                                                   |
|          |       | 10                          | 0.7                  | 12                  | 0.95        | 0.947                | 0.864 (0.809, 0.915) | 0.6 (0.3, 1.2)                                                                   | 5.3 (2.8, 8.0)                                                                          | 175 (83, 386)                                                   |
|          |       | 10                          | 0.7                  | 15                  | 0.98        | 0.984                | 0.803 (0.721, 0.879) | 0.5 (0.2, 1.1)                                                                   | 1.6 (0.1, 3.8)                                                                          | 189 (91, 416)                                                   |
| Panama   | Men   | 10                          | 3.9                  | 14                  | 0.90        | 0.902                | 0.747 (0.690, 0.795) | 2.9 (2.1, 3.9)                                                                   | 9.4 (6.8, 12.7)                                                                         | 35 (26, 48)                                                     |
|          |       | 10                          | 3.9                  | 18                  | 0.95        | 0.954                | 0.647 (0.564, 0.722) | 2.5 (1.8, 3.4)                                                                   | 4.4 (2.0, 7.7)                                                                          | 40 (29, 56)                                                     |
|          |       | 10                          | 3.9                  | 21                  | 0.98        | 0.979                | 0.576 (0.473, 0.671) | 2.2 (1.6, 3.2)                                                                   | 2 (0.2, 5.1)                                                                            | 45 (32, 64)                                                     |
|          | Women | 10                          | 1.8                  | 10                  | 0.90        | 0.908                | 0.901 (0.859, 0.938) | 1.6 (1.0, 2.5)                                                                   | 9.1 (6.2, 11.8)                                                                         | 61 (40, 99)                                                     |

| Country          | Sex   | Standard drink size (grams) | Prevalence (%) of AD | AUDIT cut-off score | Specificity | Specificity (actual) | Sensitivity (95% UI) | People who have AD and a positive AUDIT score [per 100 people screened] (95% UI) | People who do not have AD and a positive AUDIT score [per 100 people screened] (95% UI) | Number of people needed to screen to treat one AD case (95% UI) |
|------------------|-------|-----------------------------|----------------------|---------------------|-------------|----------------------|----------------------|----------------------------------------------------------------------------------|-----------------------------------------------------------------------------------------|-----------------------------------------------------------------|
| Papua New Guinea | Men   | 10                          | 1.8                  | 12                  | 0.95        | 0.947                | 0.864 (0.809, 0.915) | 1.6 (1.0, 2.4)                                                                   | 5.2 (2.7, 7.9)                                                                          | 64 (42, 104)                                                    |
|                  |       | 10                          | 1.8                  | 15                  | 0.98        | 0.984                | 0.803 (0.721, 0.879) | 1.5 (0.9, 2.2)                                                                   | 1.6 (0.1, 3.8)                                                                          | 69 (45, 113)                                                    |
|                  |       | 10                          | 5.1                  | 14                  | 0.90        | 0.902                | 0.747 (0.690, 0.795) | 3.8 (2.9, 4.9)                                                                   | 9.3 (6.7, 12.5)                                                                         | 26 (20, 35)                                                     |
|                  |       | 10                          | 5.1                  | 18                  | 0.95        | 0.954                | 0.647 (0.564, 0.722) | 3.3 (2.4, 4.3)                                                                   | 4.4 (2.0, 7.6)                                                                          | 30 (23, 41)                                                     |
|                  | Women | 10                          | 5.1                  | 21                  | 0.98        | 0.979                | 0.576 (0.473, 0.671) | 3 (2.1, 3.9)                                                                     | 2 (0.2, 5.0)                                                                            | 34 (26, 48)                                                     |
|                  |       | 10                          | 0.7                  | 10                  | 0.90        | 0.908                | 0.901 (0.859, 0.938) | 0.6 (0.3, 1.2)                                                                   | 9.2 (6.3, 11.9)                                                                         | 166 (81, 342)                                                   |
|                  |       | 10                          | 0.7                  | 12                  | 0.95        | 0.947                | 0.864 (0.809, 0.915) | 0.6 (0.3, 1.2)                                                                   | 5.3 (2.8, 7.9)                                                                          | 173 (84, 355)                                                   |
|                  |       | 10                          | 0.7                  | 15                  | 0.98        | 0.984                | 0.803 (0.721, 0.879) | 0.5 (0.3, 1.1)                                                                   | 1.6 (0.1, 3.8)                                                                          | 186 (90, 389)                                                   |
| Paraguay         | Men   | 10                          | 3.9                  | 14                  | 0.90        | 0.902                | 0.747 (0.690, 0.795) | 2.9 (2.1, 3.9)                                                                   | 9.4 (6.7, 12.6)                                                                         | 34 (26, 48)                                                     |
|                  |       | 10                          | 3.9                  | 18                  | 0.95        | 0.954                | 0.647 (0.564, 0.722) | 2.5 (1.8, 3.4)                                                                   | 4.4 (2.0, 7.7)                                                                          | 40 (29, 56)                                                     |
|                  |       | 10                          | 3.9                  | 21                  | 0.98        | 0.979                | 0.576 (0.473, 0.671) | 2.2 (1.5, 3.1)                                                                   | 2 (0.2, 5.1)                                                                            | 45 (32, 66)                                                     |
|                  | Women | 10                          | 1.8                  | 10                  | 0.90        | 0.908                | 0.901 (0.859, 0.938) | 1.6 (1.0, 2.5)                                                                   | 9.1 (6.2, 11.8)                                                                         | 61 (40, 96)                                                     |
|                  |       | 10                          | 1.8                  | 12                  | 0.95        | 0.947                | 0.864 (0.809, 0.915) | 1.6 (1.0, 2.4)                                                                   | 5.2 (2.7, 7.8)                                                                          | 64 (41, 99)                                                     |
|                  |       | 10                          | 1.8                  | 15                  | 0.98        | 0.984                | 0.803 (0.721, 0.879) | 1.5 (0.9, 2.3)                                                                   | 1.6 (0.1, 3.8)                                                                          | 68 (43, 108)                                                    |
| Peru             | Men   | 10                          | 7.9                  | 14                  | 0.90        | 0.902                | 0.747 (0.690, 0.795) | 5.9 (4.6, 7.3)                                                                   | 9.1 (6.5, 12.1)                                                                         | 17 (14, 22)                                                     |
|                  |       | 10                          | 7.9                  | 18                  | 0.95        | 0.954                | 0.647 (0.564, 0.722) | 5.1 (3.9, 6.5)                                                                   | 4.3 (1.9, 7.4)                                                                          | 20 (15, 26)                                                     |

| Country     | Sex   | Standard drink size (grams) | Prevalence (%) of AD | AUDIT cut-off score | Specificity | Specificity (actual) | Sensitivity (95% UI) | People who have AD and a positive AUDIT score [per 100 people screened] (95% UI) | People who do not have AD and a positive AUDIT score [per 100 people screened] (95% UI) | Number of people needed to screen to treat one AD case (95% UI) |
|-------------|-------|-----------------------------|----------------------|---------------------|-------------|----------------------|----------------------|----------------------------------------------------------------------------------|-----------------------------------------------------------------------------------------|-----------------------------------------------------------------|
| Philippines | Women | 10                          | 7.9                  | 21                  | 0.98        | 0.979                | 0.576 (0.473, 0.671) | 4.6 (3.3, 5.9)                                                                   | 2 (0.2, 4.9)                                                                            | 22 (17, 30)                                                     |
|             |       | 10                          | 1.9                  | 10                  | 0.90        | 0.908                | 0.901 (0.859, 0.938) | 1.7 (1.1, 2.6)                                                                   | 9.1 (6.2, 11.8)                                                                         | 57 (38, 92)                                                     |
|             |       | 10                          | 1.9                  | 12                  | 0.95        | 0.947                | 0.864 (0.809, 0.915) | 1.7 (1.0, 2.5)                                                                   | 5.2 (2.7, 7.9)                                                                          | 60 (40, 96)                                                     |
|             |       | 10                          | 1.9                  | 15                  | 0.98        | 0.984                | 0.803 (0.721, 0.879) | 1.6 (1.0, 2.3)                                                                   | 1.6 (0.1, 3.8)                                                                          | 64 (43, 105)                                                    |
|             |       | 14                          | 5.2                  | 14                  | 0.90        | 0.899                | 0.741 (0.668, 0.800) | 3.8 (2.8, 5.0)                                                                   | 9.5 (6.5, 13.3)                                                                         | 26 (20, 35)                                                     |
|             | Men   | 14                          | 5.2                  | 18                  | 0.95        | 0.952                | 0.641 (0.549, 0.722) | 3.3 (2.4, 4.3)                                                                   | 4.5 (2.1, 8.1)                                                                          | 30 (23, 41)                                                     |
|             |       | 14                          | 5.2                  | 21                  | 0.98        | 0.978                | 0.569 (0.460, 0.667) | 2.9 (2.1, 3.9)                                                                   | 2.1 (0.3, 5.4)                                                                          | 34 (26, 48)                                                     |
|             |       | 14                          | 0.7                  | 6                   | 0.90        | 0.889                | 0.73 (0.630, 0.821)  | 0.5 (0.2, 1.0)                                                                   | 11 (6.9, 16.3)                                                                          | 208 (100, 472)                                                  |
|             |       | 14                          | 0.7                  | 8                   | 0.95        | 0.942                | 0.681 (0.587, 0.767) | 0.4 (0.2, 0.9)                                                                   | 5.8 (3.1, 9.5)                                                                          | 223 (107, 508)                                                  |
|             |       | 14                          | 0.7                  | 10                  | 0.98        | 0.975                | 0.63 (0.535, 0.714)  | 0.4 (0.2, 0.9)                                                                   | 2.4 (0.7, 5.2)                                                                          | 241 (115, 545)                                                  |
| Poland      | Men   | 10                          | 4.1                  | 14                  | 0.90        | 0.902                | 0.747 (0.690, 0.795) | 3.1 (2.3, 4.2)                                                                   | 9.4 (6.7, 12.6)                                                                         | 33 (24, 44)                                                     |
|             |       | 10                          | 4.1                  | 18                  | 0.95        | 0.954                | 0.647 (0.564, 0.722) | 2.7 (1.9, 3.7)                                                                   | 4.4 (2.0, 7.7)                                                                          | 38 (27, 52)                                                     |
|             |       | 10                          | 4.1                  | 21                  | 0.98        | 0.979                | 0.576 (0.473, 0.671) | 2.4 (1.7, 3.4)                                                                   | 2 (0.2, 5.1)                                                                            | 42 (30, 60)                                                     |
|             | Women | 10                          | 0.4                  | 10                  | 0.90        | 0.908                | 0.901 (0.859, 0.938) | 0.4 (0.1, 0.9)                                                                   | 9.2 (6.3, 12.0)                                                                         | 278 (106, 732)                                                  |
|             |       | 10                          | 0.4                  | 12                  | 0.95        | 0.947                | 0.864 (0.809, 0.915) | 0.3 (0.1, 0.9)                                                                   | 5.3 (2.8, 8.0)                                                                          | 289 (111, 752)                                                  |
|             |       | 10                          | 0.4                  | 15                  | 0.98        | 0.984                | 0.803 (0.721, 0.879) | 0.3 (0.1, 0.8)                                                                   | 1.6 (0.1, 3.9)                                                                          | 311 (121, 788)                                                  |

| Country             | Sex   | Standard drink size (grams) | Prevalence (%) of AD | AUDIT cut-off score | Specificity | Specificity (actual) | Sensitivity (95% UI) | People who have AD and a positive AUDIT score [per 100 people screened] (95% UI) | People who do not have AD and a positive AUDIT score [per 100 people screened] (95% UI) | Number of people needed to screen to treat one AD case (95% UI) |
|---------------------|-------|-----------------------------|----------------------|---------------------|-------------|----------------------|----------------------|----------------------------------------------------------------------------------|-----------------------------------------------------------------------------------------|-----------------------------------------------------------------|
| Portugal            | Men   | 11                          | 4.9                  | 14                  | 0.90        | 0.901                | 0.745 (0.698, 0.787) | 3.7 (2.8, 4.7)                                                                   | 9.4 (7.0, 12.0)                                                                         | 27 (21, 36)                                                     |
|                     |       | 11                          | 4.9                  | 18                  | 0.95        | 0.953                | 0.646 (0.571, 0.710) | 3.2 (2.4, 4.2)                                                                   | 4.4 (2.2, 7.4)                                                                          | 32 (24, 42)                                                     |
|                     |       | 11                          | 4.9                  | 21                  | 0.98        | 0.979                | 0.574 (0.481, 0.663) | 2.8 (2.1, 3.8)                                                                   | 2 (0.3, 4.8)                                                                            | 36 (26, 48)                                                     |
|                     | Women | 11                          | 1.4                  | 9                   | 0.90        | 0.906                | 0.863 (0.830, 0.896) | 1.2 (0.7, 2.1)                                                                   | 9.3 (7.3, 11.5)                                                                         | 83 (48, 137)                                                    |
|                     |       | 11                          | 1.4                  | 11                  | 0.95        | 0.947                | 0.823 (0.783, 0.864) | 1.2 (0.7, 2.0)                                                                   | 5.2 (3.4, 7.2)                                                                          | 87 (51, 145)                                                    |
|                     |       | 11                          | 1.4                  | 13                  | 0.98        | 0.975                | 0.78 (0.722, 0.835)  | 1.1 (0.7, 1.9)                                                                   | 2.4 (0.9, 4.3)                                                                          | 92 (54, 152)                                                    |
| Qatar               | Men   | 10                          | 0.2                  | 14                  | 0.90        | 0.902                | 0.747 (0.690, 0.795) | 0.1 (<0.1, 0.6)                                                                  | 9.8 (7.0, 13.2)                                                                         | 890 (179, 4665)                                                 |
|                     |       | 10                          | 0.2                  | 18                  | 0.95        | 0.954                | 0.647 (0.564, 0.722) | 0.1 (<0.1, 0.5)                                                                  | 4.6 (2.1, 8.0)                                                                          | 1027 (207, 5431)                                                |
|                     |       | 10                          | 0.2                  | 21                  | 0.98        | 0.979                | 0.576 (0.473, 0.671) | 0.1 (<0.1, 0.4)                                                                  | 2.1 (0.2, 5.3)                                                                          | 1154 (233, 6078)                                                |
|                     | Women | 10                          | 0.0                  | 10                  | 0.90        | 0.908                | 0.901 (0.859, 0.938) | <0.1 (<0.1, 1.0)                                                                 | 9.2 (6.3, 12.0)                                                                         | 4214 (103, 246638)                                              |
|                     |       | 10                          | 0.0                  | 12                  | 0.95        | 0.947                | 0.864 (0.809, 0.915) | <0.1 (<0.1, 0.9)                                                                 | 5.3 (2.8, 8.0)                                                                          | 4391 (107, 257408)                                              |
|                     |       | 10                          | 0.0                  | 15                  | 0.98        | 0.984                | 0.803 (0.721, 0.879) | <0.1 (<0.1, 0.9)                                                                 | 1.6 (0.1, 3.9)                                                                          | 4727 (113, 278310)                                              |
| Korea (Republic of) | Men   | 10                          | 7.7                  | 14                  | 0.90        | 0.902                | 0.747 (0.690, 0.795) | 5.8 (4.6, 7.1)                                                                   | 9.1 (6.5, 12.1)                                                                         | 17 (14, 22)                                                     |
|                     |       | 10                          | 7.7                  | 18                  | 0.95        | 0.954                | 0.647 (0.564, 0.722) | 5 (3.9, 6.3)                                                                     | 4.3 (1.9, 7.3)                                                                          | 20 (16, 26)                                                     |
|                     |       | 10                          | 7.7                  | 21                  | 0.98        | 0.979                | 0.576 (0.473, 0.671) | 4.4 (3.3, 5.7)                                                                   | 2 (0.2, 4.9)                                                                            | 23 (17, 30)                                                     |
|                     | Women | 10                          | 3.4                  | 10                  | 0.90        | 0.908                | 0.901 (0.859, 0.938) | 3.1 (2.1, 4.2)                                                                   | 8.9 (6.1, 11.6)                                                                         | 33 (24, 47)                                                     |

| Country               | Sex   | Standard drink size (grams) | Prevalence (%) of AD | AUDIT cut-off score | Specificity | Specificity (actual) | Sensitivity (95% UI) | People who have AD and a positive AUDIT score [per 100 people screened] (95% UI) | People who do not have AD and a positive AUDIT score [per 100 people screened] (95% UI) | Number of people needed to screen to treat one AD case (95% UI) |
|-----------------------|-------|-----------------------------|----------------------|---------------------|-------------|----------------------|----------------------|----------------------------------------------------------------------------------|-----------------------------------------------------------------------------------------|-----------------------------------------------------------------|
| Moldova (Republic of) | Men   | 10                          | 3.4                  | 12                  | 0.95        | 0.947                | 0.864 (0.809, 0.915) | 2.9 (2.0, 4.1)                                                                   | 5.1 (2.7, 7.7)                                                                          | 34 (25, 49)                                                     |
|                       |       | 10                          | 3.4                  | 15                  | 0.98        | 0.984                | 0.803 (0.721, 0.879) | 2.7 (1.9, 3.8)                                                                   | 1.5 (0.1, 3.7)                                                                          | 37 (26, 54)                                                     |
|                       |       | 10                          | 5.5                  | 14                  | 0.90        | 0.902                | 0.747 (0.690, 0.795) | 4.1 (3.2, 5.3)                                                                   | 9.3 (6.6, 12.4)                                                                         | 24 (19, 31)                                                     |
|                       | Women | 10                          | 5.5                  | 18                  | 0.95        | 0.954                | 0.647 (0.564, 0.722) | 3.6 (2.7, 4.6)                                                                   | 4.4 (1.9, 7.5)                                                                          | 28 (22, 37)                                                     |
|                       |       | 10                          | 5.5                  | 21                  | 0.98        | 0.979                | 0.576 (0.473, 0.671) | 3.2 (2.3, 4.2)                                                                   | 2 (0.2, 5.0)                                                                            | 31 (24, 44)                                                     |
|                       |       | 10                          | 1.4                  | 10                  | 0.90        | 0.908                | 0.901 (0.859, 0.938) | 1.2 (0.7, 2.1)                                                                   | 9.1 (6.2, 11.9)                                                                         | 82 (48, 138)                                                    |
| Romania               | Men   | 10                          | 1.4                  | 12                  | 0.95        | 0.947                | 0.864 (0.809, 0.915) | 1.2 (0.7, 2.0)                                                                   | 5.2 (2.7, 7.9)                                                                          | 86 (50, 144)                                                    |
|                       |       | 10                          | 1.4                  | 15                  | 0.98        | 0.984                | 0.803 (0.721, 0.879) | 1.1 (0.6, 1.8)                                                                   | 1.6 (0.1, 3.8)                                                                          | 92 (54, 156)                                                    |
|                       |       | 12                          | 2.0                  | 14                  | 0.90        | 0.901                | 0.744 (0.695, 0.786) | 1.5 (1.0, 2.3)                                                                   | 9.7 (7.4, 12.5)                                                                         | 67 (43, 105)                                                    |
|                       | Women | 12                          | 2.0                  | 18                  | 0.95        | 0.953                | 0.644 (0.570, 0.707) | 1.3 (0.8, 2.0)                                                                   | 4.6 (2.3, 7.7)                                                                          | 78 (50, 123)                                                    |
|                       |       | 12                          | 2.0                  | 21                  | 0.98        | 0.978                | 0.572 (0.480, 0.655) | 1.1 (0.7, 1.8)                                                                   | 2.1 (0.4, 5.0)                                                                          | 87 (55, 139)                                                    |
|                       |       | 12                          | 0.6                  | 8                   | 0.90        | 0.902                | 0.822 (0.781, 0.861) | 0.5 (0.2, 1.1)                                                                   | 9.7 (7.7, 12.2)                                                                         | 203 (87, 445)                                                   |
| Russian Federation    | Men   | 12                          | 0.6                  | 10                  | 0.95        | 0.946                | 0.779 (0.735, 0.819) | 0.5 (0.2, 1.1)                                                                   | 5.3 (3.6, 7.4)                                                                          | 214 (92, 463)                                                   |
|                       |       | 12                          | 0.6                  | 12                  | 0.98        | 0.976                | 0.732 (0.677, 0.785) | 0.4 (0.2, 1.0)                                                                   | 2.4 (1.1, 4.0)                                                                          | 228 (98, 485)                                                   |
|                       |       | 10                          | 16.5                 | 14                  | 0.90        | 0.902                | 0.747 (0.690, 0.795) | 12.3 (10.4, 14.3)                                                                | 8.2 (5.8, 10.9)                                                                         | 8 (7, 10)                                                       |
|                       |       | 10                          | 16.5                 | 18                  | 0.95        | 0.954                | 0.647 (0.564, 0.722) | 10.7 (8.8, 12.6)                                                                 | 3.9 (1.7, 6.7)                                                                          | 9 (8, 11)                                                       |

| Country               | Sex   | Standard drink size (grams) | Prevalence (%) of AD | AUDIT cut-off score | Specificity | Specificity (actual) | Sensitivity (95% UI) | People who have AD and a positive AUDIT score [per 100 people screened] (95% UI) | People who do not have AD and a positive AUDIT score [per 100 people screened] (95% UI) | Number of people needed to screen to treat one AD case (95% UI) |
|-----------------------|-------|-----------------------------|----------------------|---------------------|-------------|----------------------|----------------------|----------------------------------------------------------------------------------|-----------------------------------------------------------------------------------------|-----------------------------------------------------------------|
| Rwanda                | Women | 10                          | 16.5                 | 21                  | 0.98        | 0.979                | 0.576 (0.473, 0.671) | 9.5 (7.4, 11.5)                                                                  | 1.8 (0.2, 4.4)                                                                          | 11 (9, 13)                                                      |
|                       |       | 10                          | 3.3                  | 10                  | 0.90        | 0.908                | 0.901 (0.859, 0.938) | 3 (2.1, 4.1)                                                                     | 8.9 (6.1, 11.7)                                                                         | 34 (24, 47)                                                     |
|                       |       | 10                          | 3.3                  | 12                  | 0.95        | 0.947                | 0.864 (0.809, 0.915) | 2.9 (2.1, 3.9)                                                                   | 5.1 (2.7, 7.8)                                                                          | 35 (25, 48)                                                     |
|                       |       | 10                          | 3.3                  | 15                  | 0.98        | 0.984                | 0.803 (0.721, 0.879) | 2.6 (1.9, 3.7)                                                                   | 1.5 (0.1, 3.7)                                                                          | 38 (27, 53)                                                     |
|                       |       | 10                          | 4.2                  | 14                  | 0.90        | 0.902                | 0.747 (0.690, 0.795) | 3.1 (2.3, 4.2)                                                                   | 9.4 (6.7, 12.5)                                                                         | 32 (24, 43)                                                     |
|                       | Men   | 10                          | 4.2                  | 18                  | 0.95        | 0.954                | 0.647 (0.564, 0.722) | 2.7 (2.0, 3.7)                                                                   | 4.4 (2.0, 7.6)                                                                          | 37 (27, 50)                                                     |
|                       |       | 10                          | 4.2                  | 21                  | 0.98        | 0.979                | 0.576 (0.473, 0.671) | 2.4 (1.7, 3.3)                                                                   | 2 (0.2, 5.1)                                                                            | 42 (30, 59)                                                     |
|                       |       | 10                          | 1.0                  | 10                  | 0.90        | 0.908                | 0.901 (0.859, 0.938) | 0.9 (0.5, 1.7)                                                                   | 9.2 (6.3, 11.9)                                                                         | 115 (58, 218)                                                   |
|                       |       | 10                          | 1.0                  | 12                  | 0.95        | 0.947                | 0.864 (0.809, 0.915) | 0.8 (0.4, 1.7)                                                                   | 5.3 (2.7, 7.9)                                                                          | 119 (60, 228)                                                   |
|                       |       | 10                          | 1.0                  | 15                  | 0.98        | 0.984                | 0.803 (0.721, 0.879) | 0.8 (0.4, 1.5)                                                                   | 1.6 (0.1, 3.8)                                                                          | 129 (65, 250)                                                   |
| Saint Kitts and Nevis | Men   | 10                          | 3.8                  | 14                  | 0.90        | 0.902                | 0.747 (0.690, 0.795) | 2.9 (2.1, 3.9)                                                                   | 9.5 (6.7, 12.7)                                                                         | 35 (26, 48)                                                     |
|                       |       | 10                          | 3.8                  | 18                  | 0.95        | 0.954                | 0.647 (0.564, 0.722) | 2.5 (1.8, 3.5)                                                                   | 4.4 (2.0, 7.7)                                                                          | 40 (29, 56)                                                     |
|                       |       | 10                          | 3.8                  | 21                  | 0.98        | 0.979                | 0.576 (0.473, 0.671) | 2.2 (1.5, 3.1)                                                                   | 2 (0.2, 5.1)                                                                            | 45 (32, 65)                                                     |
|                       | Women | 10                          | 1.8                  | 10                  | 0.90        | 0.908                | 0.901 (0.859, 0.938) | 1.6 (1.0, 2.5)                                                                   | 9.1 (6.2, 11.8)                                                                         | 62 (39, 98)                                                     |
|                       |       | 10                          | 1.8                  | 12                  | 0.95        | 0.947                | 0.864 (0.809, 0.915) | 1.5 (1.0, 2.4)                                                                   | 5.2 (2.7, 7.8)                                                                          | 65 (41, 103)                                                    |
|                       |       | 10                          | 1.8                  | 15                  | 0.98        | 0.984                | 0.803 (0.721, 0.879) | 1.4 (0.9, 2.3)                                                                   | 1.6 (0.1, 3.8)                                                                          | 70 (44, 112)                                                    |



| Country                          | Sex   | Standard drink size (grams) | Prevalence (%) of AD | AUDIT cut-off score | Specificity | Specificity (actual) | Sensitivity (95% UI) | People who have AD and a positive AUDIT score [per 100 people screened] (95% UI) | People who do not have AD and a positive AUDIT score [per 100 people screened] (95% UI) | Number of people needed to screen to treat one AD case (95% UI) |
|----------------------------------|-------|-----------------------------|----------------------|---------------------|-------------|----------------------|----------------------|----------------------------------------------------------------------------------|-----------------------------------------------------------------------------------------|-----------------------------------------------------------------|
| Saint Lucia                      | Men   | 10                          | 3.8                  | 14                  | 0.90        | 0.902                | 0.747 (0.690, 0.795) | 2.9 (2.0, 3.9)                                                                   | 9.5 (6.8, 12.6)                                                                         | 35 (26, 49)                                                     |
|                                  |       | 10                          | 3.8                  | 18                  | 0.95        | 0.954                | 0.647 (0.564, 0.722) | 2.5 (1.7, 3.4)                                                                   | 4.4 (2.0, 7.7)                                                                          | 40 (30, 58)                                                     |
|                                  |       | 10                          | 3.8                  | 21                  | 0.98        | 0.979                | 0.576 (0.473, 0.671) | 2.2 (1.5, 3.1)                                                                   | 2 (0.2, 5.1)                                                                            | 45 (33, 67)                                                     |
|                                  | Women | 10                          | 1.8                  | 10                  | 0.90        | 0.908                | 0.901 (0.859, 0.938) | 1.6 (1.0, 2.5)                                                                   | 9.1 (6.2, 11.8)                                                                         | 62 (39, 98)                                                     |
|                                  |       | 10                          | 1.8                  | 12                  | 0.95        | 0.947                | 0.864 (0.809, 0.915) | 1.5 (1.0, 2.4)                                                                   | 5.2 (2.7, 7.9)                                                                          | 65 (41, 102)                                                    |
|                                  |       | 10                          | 1.8                  | 15                  | 0.98        | 0.984                | 0.803 (0.721, 0.879) | 1.4 (0.9, 2.3)                                                                   | 1.6 (0.1, 3.8)                                                                          | 70 (44, 113)                                                    |
| Saint Vincent and the Grenadines | Men   | 10                          | 3.9                  | 14                  | 0.90        | 0.902                | 0.747 (0.690, 0.795) | 2.9 (2.1, 3.9)                                                                   | 9.4 (6.8, 12.6)                                                                         | 35 (25, 48)                                                     |
|                                  |       | 10                          | 3.9                  | 18                  | 0.95        | 0.954                | 0.647 (0.564, 0.722) | 2.5 (1.8, 3.5)                                                                   | 4.4 (2.0, 7.7)                                                                          | 40 (29, 56)                                                     |
|                                  |       | 10                          | 3.9                  | 21                  | 0.98        | 0.979                | 0.576 (0.473, 0.671) | 2.2 (1.5, 3.2)                                                                   | 2 (0.2, 5.1)                                                                            | 45 (32, 65)                                                     |
|                                  | Women | 10                          | 1.8                  | 10                  | 0.90        | 0.908                | 0.901 (0.859, 0.938) | 1.6 (1.1, 2.6)                                                                   | 9.1 (6.2, 11.8)                                                                         | 62 (38, 95)                                                     |
|                                  |       | 10                          | 1.8                  | 12                  | 0.95        | 0.947                | 0.864 (0.809, 0.915) | 1.6 (1.0, 2.5)                                                                   | 5.2 (2.7, 7.8)                                                                          | 64 (40, 100)                                                    |
|                                  |       | 10                          | 1.8                  | 15                  | 0.98        | 0.984                | 0.803 (0.721, 0.879) | 1.4 (0.9, 2.3)                                                                   | 1.6 (0.1, 3.8)                                                                          | 69 (43, 109)                                                    |
| Samoa                            | Men   | 10                          | 5.2                  | 14                  | 0.90        | 0.902                | 0.747 (0.690, 0.795) | 3.9 (2.9, 5.0)                                                                   | 9.3 (6.7, 12.5)                                                                         | 26 (20, 34)                                                     |
|                                  |       | 10                          | 5.2                  | 18                  | 0.95        | 0.954                | 0.647 (0.564, 0.722) | 3.4 (2.5, 4.4)                                                                   | 4.4 (2.0, 7.6)                                                                          | 30 (23, 40)                                                     |
|                                  |       | 10                          | 5.2                  | 21                  | 0.98        | 0.979                | 0.576 (0.473, 0.671) | 3 (2.2, 4.0)                                                                     | 2 (0.2, 5.0)                                                                            | 34 (25, 46)                                                     |
|                                  | Women | 10                          | 0.7                  | 10                  | 0.90        | 0.908                | 0.901 (0.859, 0.938) | 0.6 (0.3, 1.2)                                                                   | 9.2 (6.3, 12.0)                                                                         | 171 (81, 353)                                                   |

| Country               | Sex   | Standard drink size (grams) | Prevalence (%) of AD | AUDIT cut-off score | Specificity | Specificity (actual) | Sensitivity (95% UI) | People who have AD and a positive AUDIT score [per 100 people screened] (95% UI) | People who do not have AD and a positive AUDIT score [per 100 people screened] (95% UI) | Number of people needed to screen to treat one AD case (95% UI) |
|-----------------------|-------|-----------------------------|----------------------|---------------------|-------------|----------------------|----------------------|----------------------------------------------------------------------------------|-----------------------------------------------------------------------------------------|-----------------------------------------------------------------|
| Sao Tome and Principe | Men   | 10                          | 0.7                  | 12                  | 0.95        | 0.947                | 0.864 (0.809, 0.915) | 0.6 (0.3, 1.2)                                                                   | 5.3 (2.8, 7.9)                                                                          | 178 (84, 369)                                                   |
|                       |       | 10                          | 0.7                  | 15                  | 0.98        | 0.984                | 0.803 (0.721, 0.879) | 0.5 (0.3, 1.1)                                                                   | 1.6 (0.1, 3.9)                                                                          | 192 (90, 394)                                                   |
|                       |       | 10                          | 3.7                  | 14                  | 0.90        | 0.902                | 0.747 (0.690, 0.795) | 2.8 (2.0, 3.9)                                                                   | 9.5 (6.7, 12.7)                                                                         | 36 (26, 50)                                                     |
|                       |       | 10                          | 3.7                  | 18                  | 0.95        | 0.954                | 0.647 (0.564, 0.722) | 2.4 (1.7, 3.4)                                                                   | 4.5 (2.0, 7.7)                                                                          | 42 (29, 59)                                                     |
|                       | Women | 10                          | 3.7                  | 21                  | 0.98        | 0.979                | 0.576 (0.473, 0.671) | 2.1 (1.5, 3.1)                                                                   | 2 (0.2, 5.1)                                                                            | 47 (32, 68)                                                     |
|                       |       | 10                          | 0.8                  | 10                  | 0.90        | 0.908                | 0.901 (0.859, 0.938) | 0.7 (0.3, 1.4)                                                                   | 9.2 (6.3, 11.9)                                                                         | 145 (70, 293)                                                   |
|                       |       | 10                          | 0.8                  | 12                  | 0.95        | 0.947                | 0.864 (0.809, 0.915) | 0.7 (0.3, 1.4)                                                                   | 5.3 (2.8, 8.0)                                                                          | 152 (74, 305)                                                   |
|                       |       | 10                          | 0.8                  | 15                  | 0.98        | 0.984                | 0.803 (0.721, 0.879) | 0.6 (0.3, 1.2)                                                                   | 1.6 (0.1, 3.8)                                                                          | 163 (81, 331)                                                   |
| Saudi Arabia          | Men   | 10                          | 0.4                  | 14                  | 0.90        | 0.902                | 0.747 (0.690, 0.795) | 0.3 (0.1, 0.7)                                                                   | 9.8 (7.0, 13.1)                                                                         | 383 (138, 1079)                                                 |
|                       |       | 10                          | 0.4                  | 18                  | 0.95        | 0.954                | 0.647 (0.564, 0.722) | 0.2 (0.1, 0.6)                                                                   | 4.6 (2.0, 7.9)                                                                          | 441 (158, 1234)                                                 |
|                       |       | 10                          | 0.4                  | 21                  | 0.98        | 0.979                | 0.576 (0.473, 0.671) | 0.2 (0.1, 0.6)                                                                   | 2.1 (0.2, 5.3)                                                                          | 496 (177, 1415)                                                 |
|                       | Women | 10                          | 0.1                  | 10                  | 0.90        | 0.908                | 0.901 (0.859, 0.938) | 0.1 (<0.1, 0.6)                                                                  | 9.2 (6.3, 12.0)                                                                         | 1388 (162, 13447)                                               |
|                       |       | 10                          | 0.1                  | 12                  | 0.95        | 0.947                | 0.864 (0.809, 0.915) | 0.1 (<0.1, 0.6)                                                                  | 5.3 (2.8, 8.0)                                                                          | 1446 (172, 14042)                                               |
|                       |       | 10                          | 0.1                  | 15                  | 0.98        | 0.984                | 0.803 (0.721, 0.879) | 0.1 (<0.1, 0.5)                                                                  | 1.6 (0.1, 3.9)                                                                          | 1557 (193, 14681)                                               |
| Senegal               | Men   | 10                          | 1.4                  | 14                  | 0.90        | 0.902                | 0.747 (0.690, 0.795) | 1 (0.6, 1.7)                                                                     | 9.7 (6.9, 13.0)                                                                         | 96 (59, 166)                                                    |
|                       |       | 10                          | 1.4                  | 18                  | 0.95        | 0.954                | 0.647 (0.564, 0.722) | 0.9 (0.5, 1.5)                                                                   | 4.6 (2.0, 7.9)                                                                          | 111 (67, 194)                                                   |

| Country    | Sex   | Standard drink size (grams) | Prevalence (%) of AD | AUDIT cut-off score | Specificity | Specificity (actual) | Sensitivity (95% UI) | People who have AD and a positive AUDIT score [per 100 people screened] (95% UI) | People who do not have AD and a positive AUDIT score [per 100 people screened] (95% UI) | Number of people needed to screen to treat one AD case (95% UI) |              |
|------------|-------|-----------------------------|----------------------|---------------------|-------------|----------------------|----------------------|----------------------------------------------------------------------------------|-----------------------------------------------------------------------------------------|-----------------------------------------------------------------|--------------|
| Serbia     | Women | 10                          | 1.4                  | 21                  | 0.98        | 0.979                | 0.576 (0.473, 0.671) | 0.8 (0.4, 1.3)                                                                   | 2.1 (0.2, 5.3)                                                                          | 125 (76, 222)                                                   |              |
|            |       | 10                          | 0.0                  | 10                  | 0.90        | 0.908                | 0.901 (0.859, 0.938) | <0.1 (<0.1, 1.1)                                                                 | 9.2 (6.3, 12.0)                                                                         | 3701 (91, 125398)                                               |              |
|            |       | 10                          | 0.0                  | 12                  | 0.95        | 0.947                | 0.864 (0.809, 0.915) | <0.1 (<0.1, 1.1)                                                                 | 5.3 (2.8, 8.0)                                                                          | 3857 (94, 131723)                                               |              |
|            |       | 10                          | 0.0                  | 15                  | 0.98        | 0.984                | 0.803 (0.721, 0.879) | <0.1 (<0.1, 1.0)                                                                 | 1.6 (0.1, 3.9)                                                                          | 4152 (102, 140515)                                              |              |
|            |       | 10                          | 5.5                  | 14                  | 0.90        | 0.902                | 0.747 (0.690, 0.795) | 4.1 (3.2, 5.4)                                                                   | 9.3 (6.6, 12.4)                                                                         | 24 (18, 31)                                                     |              |
|            | Men   | 10                          | 5.5                  | 18                  | 0.95        | 0.954                | 0.647 (0.564, 0.722) | 3.6 (2.7, 4.7)                                                                   | 4.4 (1.9, 7.5)                                                                          | 28 (21, 37)                                                     |              |
|            |       | 10                          | 5.5                  | 21                  | 0.98        | 0.979                | 0.576 (0.473, 0.671) | 3.2 (2.4, 4.2)                                                                   | 2 (0.2, 5.0)                                                                            | 31 (24, 42)                                                     |              |
|            |       | Women                       | 10                   | 1.3                 | 10          | 0.90                 | 0.908                | 0.901 (0.859, 0.938)                                                             | 1.2 (0.7, 2.0)                                                                          | 9.1 (6.2, 11.8)                                                 | 83 (49, 138) |
|            |       |                             | 10                   | 1.3                 | 12          | 0.95                 | 0.947                | 0.864 (0.809, 0.915)                                                             | 1.2 (0.7, 1.9)                                                                          | 5.2 (2.7, 7.9)                                                  | 86 (52, 144) |
|            |       |                             | 10                   | 1.3                 | 15          | 0.98                 | 0.984                | 0.803 (0.721, 0.879)                                                             | 1.1 (0.6, 1.8)                                                                          | 1.6 (0.1, 3.8)                                                  | 93 (55, 157) |
| Seychelles | Men   | 10                          | 4.1                  | 14                  | 0.90        | 0.902                | 0.747 (0.690, 0.795) | 3.1 (2.2, 4.2)                                                                   | 9.4 (6.7, 12.6)                                                                         | 32 (24, 44)                                                     |              |
|            |       | 10                          | 4.1                  | 18                  | 0.95        | 0.954                | 0.647 (0.564, 0.722) | 2.7 (1.9, 3.7)                                                                   | 4.4 (2.0, 7.6)                                                                          | 37 (27, 52)                                                     |              |
|            |       | 10                          | 4.1                  | 21                  | 0.98        | 0.979                | 0.576 (0.473, 0.671) | 2.4 (1.7, 3.3)                                                                   | 2 (0.2, 5.1)                                                                            | 42 (30, 60)                                                     |              |
|            | Women | 10                          | 0.9                  | 10                  | 0.90        | 0.908                | 0.901 (0.859, 0.938) | 0.8 (0.4, 1.6)                                                                   | 9.2 (6.3, 11.9)                                                                         | 122 (63, 229)                                                   |              |
|            |       | 10                          | 0.9                  | 12                  | 0.95        | 0.947                | 0.864 (0.809, 0.915) | 0.8 (0.4, 1.5)                                                                   | 5.3 (2.7, 8.0)                                                                          | 127 (66, 240)                                                   |              |
|            |       | 10                          | 0.9                  | 15                  | 0.98        | 0.984                | 0.803 (0.721, 0.879) | 0.7 (0.4, 1.4)                                                                   | 1.6 (0.1, 3.8)                                                                          | 136 (70, 260)                                                   |              |

| Country      | Sex   | Standard drink size (grams) | Prevalence (%) of AD | AUDIT cut-off score | Specificity | Specificity (actual) | Sensitivity (95% UI) | People who have AD and a positive AUDIT score [per 100 people screened] (95% UI) | People who do not have AD and a positive AUDIT score [per 100 people screened] (95% UI) | Number of people needed to screen to treat one AD case (95% UI) |
|--------------|-------|-----------------------------|----------------------|---------------------|-------------|----------------------|----------------------|----------------------------------------------------------------------------------|-----------------------------------------------------------------------------------------|-----------------------------------------------------------------|
| Sierra Leone | Men   | 10                          | 1.4                  | 14                  | 0.90        | 0.902                | 0.747 (0.690, 0.795) | 1 (0.6, 1.8)                                                                     | 9.7 (6.9, 13.0)                                                                         | 96 (55, 164)                                                    |
|              |       | 10                          | 1.4                  | 18                  | 0.95        | 0.954                | 0.647 (0.564, 0.722) | 0.9 (0.5, 1.6)                                                                   | 4.6 (2.0, 7.9)                                                                          | 111 (63, 194)                                                   |
|              |       | 10                          | 1.4                  | 21                  | 0.98        | 0.979                | 0.576 (0.473, 0.671) | 0.8 (0.4, 1.4)                                                                   | 2.1 (0.2, 5.2)                                                                          | 125 (69, 222)                                                   |
|              | Women | 10                          | 0.0                  | 10                  | 0.90        | 0.908                | 0.901 (0.859, 0.938) | <0.1 (<0.1, 1.0)                                                                 | 9.2 (6.3, 12.0)                                                                         | 3701 (98, 126886)                                               |
|              |       | 10                          | 0.0                  | 12                  | 0.95        | 0.947                | 0.864 (0.809, 0.915) | <0.1 (<0.1, 1.0)                                                                 | 5.3 (2.8, 8.0)                                                                          | 3857 (102, 133932)                                              |
|              |       | 10                          | 0.0                  | 15                  | 0.98        | 0.984                | 0.803 (0.721, 0.879) | <0.1 (<0.1, 0.9)                                                                 | 1.6 (0.1, 3.9)                                                                          | 4152 (110, 148168)                                              |
| Singapore    | Men   | 10                          | 0.7                  | 14                  | 0.90        | 0.902                | 0.747 (0.690, 0.795) | 0.5 (0.2, 1.1)                                                                   | 9.8 (7.0, 13.1)                                                                         | 186 (90, 414)                                                   |
|              |       | 10                          | 0.7                  | 18                  | 0.95        | 0.954                | 0.647 (0.564, 0.722) | 0.5 (0.2, 1.0)                                                                   | 4.6 (2.0, 7.9)                                                                          | 215 (104, 473)                                                  |
|              |       | 10                          | 0.7                  | 21                  | 0.98        | 0.979                | 0.576 (0.473, 0.671) | 0.4 (0.2, 0.9)                                                                   | 2.1 (0.2, 5.3)                                                                          | 241 (116, 541)                                                  |
|              | Women | 10                          | 0.2                  | 10                  | 0.90        | 0.908                | 0.901 (0.859, 0.938) | 0.2 (0.1, 0.7)                                                                   | 9.2 (6.3, 12.0)                                                                         | 505 (137, 1675)                                                 |
|              |       | 10                          | 0.2                  | 12                  | 0.95        | 0.947                | 0.864 (0.809, 0.915) | 0.2 (0.1, 0.7)                                                                   | 5.3 (2.8, 8.0)                                                                          | 526 (142, 1742)                                                 |
|              |       | 10                          | 0.2                  | 15                  | 0.98        | 0.984                | 0.803 (0.721, 0.879) | 0.2 (0.1, 0.7)                                                                   | 1.6 (0.1, 3.9)                                                                          | 566 (149, 1892)                                                 |
| Slovakia     | Men   | 10                          | 10.2                 | 14                  | 0.90        | 0.902                | 0.747 (0.690, 0.795) | 7.6 (6.1, 9.2)                                                                   | 8.8 (6.3, 11.7)                                                                         | 13 (11, 16)                                                     |
|              |       | 10                          | 10.2                 | 18                  | 0.95        | 0.954                | 0.647 (0.564, 0.722) | 6.6 (5.3, 8.2)                                                                   | 4.2 (1.8, 7.2)                                                                          | 15 (12, 19)                                                     |
|              |       | 10                          | 10.2                 | 21                  | 0.98        | 0.979                | 0.576 (0.473, 0.671) | 5.9 (4.5, 7.5)                                                                   | 1.9 (0.2, 4.7)                                                                          | 17 (13, 22)                                                     |
|              | Women | 10                          | 1.1                  | 10                  | 0.90        | 0.908                | 0.901 (0.859, 0.938) | 1 (0.6, 1.8)                                                                     | 9.1 (6.2, 11.9)                                                                         | 101 (56, 179)                                                   |

| Country         | Sex   | Standard drink size (grams) | Prevalence (%) of AD | AUDIT cut-off score | Specificity | Specificity (actual) | Sensitivity (95% UI) | People who have AD and a positive AUDIT score [per 100 people screened] (95% UI) | People who do not have AD and a positive AUDIT score [per 100 people screened] (95% UI) | Number of people needed to screen to treat one AD case (95% UI) |
|-----------------|-------|-----------------------------|----------------------|---------------------|-------------|----------------------|----------------------|----------------------------------------------------------------------------------|-----------------------------------------------------------------------------------------|-----------------------------------------------------------------|
| Slovenia        | Men   | 10                          | 1.1                  | 12                  | 0.95        | 0.947                | 0.864 (0.809, 0.915) | 1 (0.5, 1.7)                                                                     | 5.3 (2.7, 7.9)                                                                          | 105 (58, 188)                                                   |
|                 |       | 10                          | 1.1                  | 15                  | 0.98        | 0.984                | 0.803 (0.721, 0.879) | 0.9 (0.5, 1.6)                                                                   | 1.6 (0.1, 3.8)                                                                          | 113 (62, 205)                                                   |
|                 |       | 10                          | 10.5                 | 14                  | 0.90        | 0.902                | 0.747 (0.690, 0.795) | 7.8 (6.4, 9.5)                                                                   | 8.8 (6.2, 11.8)                                                                         | 13 (11, 16)                                                     |
|                 |       | 10                          | 10.5                 | 18                  | 0.95        | 0.954                | 0.647 (0.564, 0.722) | 6.8 (5.4, 8.5)                                                                   | 4.1 (1.8, 7.2)                                                                          | 15 (12, 19)                                                     |
|                 | Women | 10                          | 10.5                 | 21                  | 0.98        | 0.979                | 0.576 (0.473, 0.671) | 6 (4.6, 7.7)                                                                     | 1.9 (0.2, 4.7)                                                                          | 17 (13, 22)                                                     |
|                 |       | 10                          | 2.0                  | 10                  | 0.90        | 0.908                | 0.901 (0.859, 0.938) | 1.8 (1.2, 2.9)                                                                   | 9.1 (6.2, 11.8)                                                                         | 56 (35, 85)                                                     |
|                 |       | 10                          | 2.0                  | 12                  | 0.95        | 0.947                | 0.864 (0.809, 0.915) | 1.7 (1.1, 2.8)                                                                   | 5.2 (2.7, 7.8)                                                                          | 58 (36, 89)                                                     |
|                 |       | 10                          | 2.0                  | 15                  | 0.98        | 0.984                | 0.803 (0.721, 0.879) | 1.6 (1.0, 2.6)                                                                   | 1.6 (0.1, 3.8)                                                                          | 62 (39, 96)                                                     |
| Solomon Islands | Men   | 10                          | 5.1                  | 14                  | 0.90        | 0.902                | 0.747 (0.690, 0.795) | 3.8 (2.8, 5.0)                                                                   | 9.3 (6.7, 12.5)                                                                         | 26 (20, 35)                                                     |
|                 |       | 10                          | 5.1                  | 18                  | 0.95        | 0.954                | 0.647 (0.564, 0.722) | 3.3 (2.4, 4.3)                                                                   | 4.4 (2.0, 7.6)                                                                          | 30 (23, 42)                                                     |
|                 |       | 10                          | 5.1                  | 21                  | 0.98        | 0.979                | 0.576 (0.473, 0.671) | 2.9 (2.1, 3.9)                                                                   | 2 (0.2, 5.0)                                                                            | 34 (25, 48)                                                     |
|                 | Women | 10                          | 0.7                  | 10                  | 0.90        | 0.908                | 0.901 (0.859, 0.938) | 0.6 (0.3, 1.3)                                                                   | 9.2 (6.3, 11.9)                                                                         | 168 (78, 346)                                                   |
|                 |       | 10                          | 0.7                  | 12                  | 0.95        | 0.947                | 0.864 (0.809, 0.915) | 0.6 (0.3, 1.2)                                                                   | 5.3 (2.7, 8.0)                                                                          | 175 (80, 364)                                                   |
|                 |       | 10                          | 0.7                  | 15                  | 0.98        | 0.984                | 0.803 (0.721, 0.879) | 0.5 (0.3, 1.2)                                                                   | 1.6 (0.1, 3.8)                                                                          | 189 (86, 397)                                                   |
| Somalia         | Men   | 10                          | 0.3                  | 14                  | 0.90        | 0.902                | 0.747 (0.690, 0.795) | 0.2 (0.1, 0.7)                                                                   | 9.8 (7.0, 13.1)                                                                         | 406 (148, 1331)                                                 |
|                 |       | 10                          | 0.3                  | 18                  | 0.95        | 0.954                | 0.647 (0.564, 0.722) | 0.2 (0.1, 0.6)                                                                   | 4.6 (2.1, 8.0)                                                                          | 468 (174, 1520)                                                 |

| Country      | Sex   | Standard drink size (grams) | Prevalence (%) of AD | AUDIT cut-off score | Specificity | Specificity (actual) | Sensitivity (95% UI) | People who have AD and a positive AUDIT score [per 100 people screened] (95% UI) | People who do not have AD and a positive AUDIT score [per 100 people screened] (95% UI) | Number of people needed to screen to treat one AD case (95% UI) |               |
|--------------|-------|-----------------------------|----------------------|---------------------|-------------|----------------------|----------------------|----------------------------------------------------------------------------------|-----------------------------------------------------------------------------------------|-----------------------------------------------------------------|---------------|
| South Africa | Women | 10                          | 0.3                  | 21                  | 0.98        | 0.979                | 0.576 (0.473, 0.671) | 0.2 (0.1, 0.5)                                                                   | 2.1 (0.2, 5.3)                                                                          | 526 (196, 1714)                                                 |               |
|              |       | 10                          | 0.1                  | 10                  | 0.90        | 0.908                | 0.901 (0.859, 0.938) | 0.1 (<0.1, 0.6)                                                                  | 9.2 (6.3, 12.0)                                                                         | 1388 (175, 11954)                                               |               |
|              |       | 10                          | 0.1                  | 12                  | 0.95        | 0.947                | 0.864 (0.809, 0.915) | 0.1 (<0.1, 0.6)                                                                  | 5.3 (2.8, 8.0)                                                                          | 1446 (180, 12533)                                               |               |
|              |       | 10                          | 0.1                  | 15                  | 0.98        | 0.984                | 0.803 (0.721, 0.879) | 0.1 (<0.1, 0.5)                                                                  | 1.6 (0.1, 3.9)                                                                          | 1557 (192, 13744)                                               |               |
|              | Men   | 11.5                        | 4.2                  | 14                  | 0.90        | 0.901                | 0.745 (0.699, 0.786) | 3.1 (2.3, 4.1)                                                                   | 9.5 (7.2, 12.1)                                                                         | 32 (24, 43)                                                     |               |
|              |       | 11.5                        | 4.2                  | 18                  | 0.95        | 0.953                | 0.645 (0.572, 0.707) | 2.7 (2.0, 3.6)                                                                   | 4.5 (2.3, 7.4)                                                                          | 37 (28, 50)                                                     |               |
|              |       | 11.5                        | 4.2                  | 21                  | 0.98        | 0.978                | 0.573 (0.481, 0.656) | 2.4 (1.7, 3.3)                                                                   | 2.1 (0.4, 4.8)                                                                          | 42 (31, 58)                                                     |               |
|              |       | Women                       | 11.5                 | 0.7                 | 8           | 0.90                 | 0.891                | 0.853 (0.818, 0.885)                                                             | 0.6 (0.3, 1.2)                                                                          | 10.8 (8.8, 13.1)                                                | 167 (80, 346) |
|              |       |                             | 11.5                 | 0.7                 | 11          | 0.95                 | 0.955                | 0.79 (0.746, 0.832)                                                              | 0.6 (0.3, 1.1)                                                                          | 4.5 (2.8, 6.3)                                                  | 181 (88, 370) |
|              |       |                             | 11.5                 | 0.7                 | 13          | 0.98                 | 0.981                | 0.744 (0.685, 0.800)                                                             | 0.5 (0.3, 1.1)                                                                          | 1.9 (0.6, 3.6)                                                  | 192 (93, 392) |
| Spain        | Men   | 10                          | 1.2                  | 14                  | 0.90        | 0.902                | 0.747 (0.690, 0.795) | 0.9 (0.5, 1.6)                                                                   | 9.7 (6.9, 13.0)                                                                         | 112 (62, 195)                                                   |               |
|              |       | 10                          | 1.2                  | 18                  | 0.95        | 0.954                | 0.647 (0.564, 0.722) | 0.8 (0.4, 1.4)                                                                   | 4.6 (2.0, 7.9)                                                                          | 129 (71, 228)                                                   |               |
|              |       | 10                          | 1.2                  | 21                  | 0.98        | 0.979                | 0.576 (0.473, 0.671) | 0.7 (0.4, 1.3)                                                                   | 2.1 (0.2, 5.2)                                                                          | 145 (79, 265)                                                   |               |
|              | Women | 10                          | 0.2                  | 10                  | 0.90        | 0.908                | 0.901 (0.859, 0.938) | 0.2 (<0.1, 0.8)                                                                  | 9.2 (6.3, 12.0)                                                                         | 555 (130, 2165)                                                 |               |
|              |       | 10                          | 0.2                  | 12                  | 0.95        | 0.947                | 0.864 (0.809, 0.915) | 0.2 (<0.1, 0.7)                                                                  | 5.3 (2.8, 8.0)                                                                          | 578 (135, 2244)                                                 |               |
|              |       | 10                          | 0.2                  | 15                  | 0.98        | 0.984                | 0.803 (0.721, 0.879) | 0.2 (<0.1, 0.7)                                                                  | 1.6 (0.1, 3.9)                                                                          | 623 (148, 2368)                                                 |               |

| Country   | Sex   | Standard drink size (grams) | Prevalence (%) of AD | AUDIT cut-off score | Specificity | Specificity (actual) | Sensitivity (95% UI) | People who have AD and a positive AUDIT score [per 100 people screened] (95% UI) | People who do not have AD and a positive AUDIT score [per 100 people screened] (95% UI) | Number of people needed to screen to treat one AD case (95% UI) |
|-----------|-------|-----------------------------|----------------------|---------------------|-------------|----------------------|----------------------|----------------------------------------------------------------------------------|-----------------------------------------------------------------------------------------|-----------------------------------------------------------------|
| Sri Lanka | Men   | 10                          | 4.9                  | 14                  | 0.90        | 0.902                | 0.747 (0.690, 0.795) | 3.7 (2.8, 4.8)                                                                   | 9.3 (6.7, 12.5)                                                                         | 27 (21, 36)                                                     |
|           |       | 10                          | 4.9                  | 18                  | 0.95        | 0.954                | 0.647 (0.564, 0.722) | 3.2 (2.4, 4.2)                                                                   | 4.4 (2.0, 7.6)                                                                          | 32 (24, 42)                                                     |
|           |       | 10                          | 4.9                  | 21                  | 0.98        | 0.979                | 0.576 (0.473, 0.671) | 2.8 (2.0, 3.9)                                                                   | 2 (0.2, 5.0)                                                                            | 35 (26, 49)                                                     |
|           | Women | 10                          | 0.6                  | 10                  | 0.90        | 0.908                | 0.901 (0.859, 0.938) | 0.5 (0.2, 1.1)                                                                   | 9.2 (6.3, 12.0)                                                                         | 202 (89, 436)                                                   |
|           |       | 10                          | 0.6                  | 12                  | 0.95        | 0.947                | 0.864 (0.809, 0.915) | 0.5 (0.2, 1.1)                                                                   | 5.3 (2.7, 8.0)                                                                          | 210 (92, 451)                                                   |
|           |       | 10                          | 0.6                  | 15                  | 0.98        | 0.984                | 0.803 (0.721, 0.879) | 0.4 (0.2, 1.0)                                                                   | 1.6 (0.1, 3.9)                                                                          | 226 (98, 485)                                                   |
| Sudan     | Men   | 10                          | 0.3                  | 14                  | 0.90        | 0.902                | 0.747 (0.690, 0.795) | 0.2 (0.1, 0.7)                                                                   | 9.8 (7.0, 13.1)                                                                         | 406 (138, 1166)                                                 |
|           |       | 10                          | 0.3                  | 18                  | 0.95        | 0.954                | 0.647 (0.564, 0.722) | 0.2 (0.1, 0.6)                                                                   | 4.6 (2.0, 7.9)                                                                          | 468 (156, 1303)                                                 |
|           |       | 10                          | 0.3                  | 21                  | 0.98        | 0.979                | 0.576 (0.473, 0.671) | 0.2 (0.1, 0.6)                                                                   | 2.1 (0.2, 5.3)                                                                          | 526 (173, 1503)                                                 |
|           | Women | 10                          | 0.1                  | 10                  | 0.90        | 0.908                | 0.901 (0.859, 0.938) | 0.1 (<0.1, 0.8)                                                                  | 9.2 (6.3, 12.0)                                                                         | 1388 (128, 12179)                                               |
|           |       | 10                          | 0.1                  | 12                  | 0.95        | 0.947                | 0.864 (0.809, 0.915) | 0.1 (<0.1, 0.7)                                                                  | 5.3 (2.8, 8.0)                                                                          | 1446 (134, 12687)                                               |
|           |       | 10                          | 0.1                  | 15                  | 0.98        | 0.984                | 0.803 (0.721, 0.879) | 0.1 (<0.1, 0.7)                                                                  | 1.6 (0.1, 3.8)                                                                          | 1557 (146, 14026)                                               |
| Suriname  | Men   | 10                          | 3.9                  | 14                  | 0.90        | 0.902                | 0.747 (0.690, 0.795) | 2.9 (2.1, 3.9)                                                                   | 9.4 (6.8, 12.7)                                                                         | 35 (26, 47)                                                     |
|           |       | 10                          | 3.9                  | 18                  | 0.95        | 0.954                | 0.647 (0.564, 0.722) | 2.5 (1.8, 3.4)                                                                   | 4.4 (2.0, 7.7)                                                                          | 40 (30, 56)                                                     |
|           |       | 10                          | 3.9                  | 21                  | 0.98        | 0.979                | 0.576 (0.473, 0.671) | 2.2 (1.6, 3.1)                                                                   | 2 (0.2, 5.1)                                                                            | 45 (33, 64)                                                     |
|           | Women | 10                          | 1.8                  | 10                  | 0.90        | 0.908                | 0.901 (0.859, 0.938) | 1.6 (1.0, 2.6)                                                                   | 9.1 (6.2, 11.8)                                                                         | 62 (38, 96)                                                     |

| Country     | Sex   | Standard drink size (grams) | Prevalence (%) of AD | AUDIT cut-off score | Specificity | Specificity (actual) | Sensitivity (95% UI) | People who have AD and a positive AUDIT score [per 100 people screened] (95% UI) | People who do not have AD and a positive AUDIT score [per 100 people screened] (95% UI) | Number of people needed to screen to treat one AD case (95% UI) |
|-------------|-------|-----------------------------|----------------------|---------------------|-------------|----------------------|----------------------|----------------------------------------------------------------------------------|-----------------------------------------------------------------------------------------|-----------------------------------------------------------------|
| Swaziland   | Men   | 10                          | 1.8                  | 12                  | 0.95        | 0.947                | 0.864 (0.809, 0.915) | 1.6 (1.0, 2.5)                                                                   | 5.2 (2.7, 7.9)                                                                          | 64 (40, 100)                                                    |
|             |       | 10                          | 1.8                  | 15                  | 0.98        | 0.984                | 0.803 (0.721, 0.879) | 1.4 (0.9, 2.3)                                                                   | 1.6 (0.1, 3.8)                                                                          | 69 (43, 108)                                                    |
|             |       | 10                          | 4.1                  | 14                  | 0.90        | 0.902                | 0.747 (0.690, 0.795) | 3.1 (2.2, 4.1)                                                                   | 9.4 (6.7, 12.6)                                                                         | 33 (24, 45)                                                     |
|             |       | 10                          | 4.1                  | 18                  | 0.95        | 0.954                | 0.647 (0.564, 0.722) | 2.6 (1.9, 3.6)                                                                   | 4.4 (2.0, 7.7)                                                                          | 38 (27, 53)                                                     |
|             |       | 10                          | 4.1                  | 21                  | 0.98        | 0.979                | 0.576 (0.473, 0.671) | 2.4 (1.6, 3.3)                                                                   | 2 (0.2, 5.1)                                                                            | 42 (30, 63)                                                     |
|             | Women | 10                          | 0.9                  | 10                  | 0.90        | 0.908                | 0.901 (0.859, 0.938) | 0.8 (0.4, 1.7)                                                                   | 9.2 (6.2, 11.9)                                                                         | 118 (59, 222)                                                   |
|             |       | 10                          | 0.9                  | 12                  | 0.95        | 0.947                | 0.864 (0.809, 0.915) | 0.8 (0.4, 1.6)                                                                   | 5.3 (2.8, 7.9)                                                                          | 123 (62, 230)                                                   |
|             |       | 10                          | 0.9                  | 15                  | 0.98        | 0.984                | 0.803 (0.721, 0.879) | 0.8 (0.4, 1.5)                                                                   | 1.6 (0.1, 3.8)                                                                          | 132 (68, 249)                                                   |
|             |       | 10                          | 6.4                  | 14                  | 0.90        | 0.902                | 0.747 (0.690, 0.795) | 4.8 (3.8, 5.9)                                                                   | 9.2 (6.6, 12.2)                                                                         | 21 (17, 27)                                                     |
|             |       | 10                          | 6.4                  | 18                  | 0.95        | 0.954                | 0.647 (0.564, 0.722) | 4.1 (3.2, 5.3)                                                                   | 4.3 (1.9, 7.5)                                                                          | 24 (19, 31)                                                     |
| Sweden      | Men   | 10                          | 6.4                  | 21                  | 0.98        | 0.979                | 0.576 (0.473, 0.671) | 3.7 (2.7, 4.8)                                                                   | 2 (0.2, 5.0)                                                                            | 27 (21, 37)                                                     |
|             |       | 10                          | 3.8                  | 10                  | 0.90        | 0.908                | 0.901 (0.859, 0.938) | 3.4 (2.5, 4.7)                                                                   | 8.9 (6.1, 11.6)                                                                         | 29 (21, 40)                                                     |
|             |       | 10                          | 3.8                  | 12                  | 0.95        | 0.947                | 0.864 (0.809, 0.915) | 3.3 (2.4, 4.5)                                                                   | 5.1 (2.6, 7.7)                                                                          | 30 (22, 42)                                                     |
|             | Women | 10                          | 3.8                  | 15                  | 0.98        | 0.984                | 0.803 (0.721, 0.879) | 3.1 (2.2, 4.2)                                                                   | 1.5 (0.1, 3.7)                                                                          | 33 (24, 45)                                                     |
|             |       | 11                          | 7.2                  | 14                  | 0.90        | 0.901                | 0.745 (0.698, 0.787) | 5.4 (4.3, 6.7)                                                                   | 9.2 (6.8, 11.7)                                                                         | 19 (15, 23)                                                     |
|             |       | 11                          | 7.2                  | 18                  | 0.95        | 0.953                | 0.646 (0.571, 0.710) | 4.6 (3.6, 5.8)                                                                   | 4.3 (2.1, 7.1)                                                                          | 22 (17, 28)                                                     |
| Switzerland | Men   |                             |                      |                     |             |                      |                      |                                                                                  |                                                                                         |                                                                 |



| Country              | Sex   | Standard drink size (grams) | Prevalence (%) of AD | AUDIT cut-off score | Specificity | Specificity (actual) | Sensitivity (95% UI) | People who have AD and a positive AUDIT score [per 100 people screened] (95% UI) | People who do not have AD and a positive AUDIT score [per 100 people screened] (95% UI) | Number of people needed to screen to treat one AD case (95% UI) |                     |
|----------------------|-------|-----------------------------|----------------------|---------------------|-------------|----------------------|----------------------|----------------------------------------------------------------------------------|-----------------------------------------------------------------------------------------|-----------------------------------------------------------------|---------------------|
| Syrian Arab Republic | Women | 11                          | 7.2                  | 21                  | 0.98        | 0.979                | 0.574 (0.481, 0.663) | 4.1 (3.1, 5.3)                                                                   | 2 (0.3, 4.7)                                                                            | 24 (19, 32)                                                     |                     |
|                      |       | 11                          | 1.4                  | 9                   | 0.90        | 0.906                | 0.863 (0.830, 0.896) | 1.2 (0.7, 2.0)                                                                   | 9.3 (7.3, 11.5)                                                                         | 83 (50, 140)                                                    |                     |
|                      | Men   | 11                          | 1.4                  | 11                  | 0.95        | 0.947                | 0.823 (0.783, 0.864) | 1.2 (0.7, 1.9)                                                                   | 5.2 (3.4, 7.2)                                                                          | 87 (52, 148)                                                    |                     |
|                      |       | 11                          | 1.4                  | 13                  | 0.98        | 0.975                | 0.78 (0.722, 0.835)  | 1.1 (0.6, 1.8)                                                                   | 2.4 (0.9, 4.3)                                                                          | 92 (55, 156)                                                    |                     |
|                      |       | 10                          | 0.3                  | 14                  | 0.90        | 0.902                | 0.747 (0.690, 0.795) | 0.2 (0.1, 0.7)                                                                   | 9.8 (7.0, 13.1)                                                                         | 446 (149, 1395)                                                 |                     |
|                      |       | 10                          | 0.3                  | 18                  | 0.95        | 0.954                | 0.647 (0.564, 0.722) | 0.2 (0.1, 0.6)                                                                   | 4.6 (2.0, 8.0)                                                                          | 515 (175, 1607)                                                 |                     |
|                      |       | 10                          | 0.3                  | 21                  | 0.98        | 0.979                | 0.576 (0.473, 0.671) | 0.2 (0.1, 0.5)                                                                   | 2.1 (0.2, 5.3)                                                                          | 579 (199, 1822)                                                 |                     |
|                      |       | Women                       | 10                   | 0.0                 | 10          | 0.90                 | 0.908                | 0.901 (0.859, 0.938)                                                             | <0.1 (<0.1, 4.1)                                                                        | 9.2 (6.2, 12.0)                                                 | 11104 (24, 4817556) |
|                      |       |                             | 10                   | 0.0                 | 12          | 0.95                 | 0.947                | 0.864 (0.809, 0.915)                                                             | <0.1 (<0.1, 3.9)                                                                        | 5.3 (2.7, 8.0)                                                  | 11570 (26, 4998476) |
|                      |       |                             | 10                   | 0.0                 | 15          | 0.98                 | 0.984                | 0.803 (0.721, 0.879)                                                             | <0.1 (<0.1, 3.6)                                                                        | 1.6 (0.1, 3.9)                                                  | 12456 (28, 5343415) |
| Tajikistan           | Men   | 10                          | 0.7                  | 14                  | 0.90        | 0.902                | 0.747 (0.690, 0.795) | 0.5 (0.3, 1.1)                                                                   | 9.8 (7.0, 13.1)                                                                         | 188 (92, 395)                                                   |                     |
|                      |       | 10                          | 0.7                  | 18                  | 0.95        | 0.954                | 0.647 (0.564, 0.722) | 0.5 (0.2, 0.9)                                                                   | 4.6 (2.0, 7.9)                                                                          | 217 (107, 452)                                                  |                     |
|                      |       | 10                          | 0.7                  | 21                  | 0.98        | 0.979                | 0.576 (0.473, 0.671) | 0.4 (0.2, 0.8)                                                                   | 2.1 (0.2, 5.3)                                                                          | 244 (121, 515)                                                  |                     |
|                      | Women | 10                          | 0.1                  | 10                  | 0.90        | 0.908                | 0.901 (0.859, 0.938) | 0.1 (<0.1, 0.7)                                                                  | 9.2 (6.3, 12.0)                                                                         | 826 (152, 3993)                                                 |                     |
|                      |       | 10                          | 0.1                  | 12                  | 0.95        | 0.947                | 0.864 (0.809, 0.915) | 0.1 (<0.1, 0.6)                                                                  | 5.3 (2.8, 8.0)                                                                          | 861 (159, 4152)                                                 |                     |
|                      |       | 10                          | 0.1                  | 15                  | 0.98        | 0.984                | 0.803 (0.721, 0.879) | 0.1 (<0.1, 0.6)                                                                  | 1.6 (0.1, 3.9)                                                                          | 926 (173, 4412)                                                 |                     |

| Country                                     | Sex   | Standard drink size (grams) | Prevalence (%) of AD | AUDIT cut-off score | Specificity | Specificity (actual) | Sensitivity (95% UI) | People who have AD and a positive AUDIT score [per 100 people screened] (95% UI) | People who do not have AD and a positive AUDIT score [per 100 people screened] (95% UI) | Number of people needed to screen to treat one AD case (95% UI) |
|---------------------------------------------|-------|-----------------------------|----------------------|---------------------|-------------|----------------------|----------------------|----------------------------------------------------------------------------------|-----------------------------------------------------------------------------------------|-----------------------------------------------------------------|
| Thailand                                    | Men   | 10                          | 3.5                  | 14                  | 0.90        | 0.902                | 0.747 (0.690, 0.795) | 2.6 (1.9, 3.6)                                                                   | 9.5 (6.8, 12.7)                                                                         | 39 (28, 53)                                                     |
|                                             |       | 10                          | 3.5                  | 18                  | 0.95        | 0.954                | 0.647 (0.564, 0.722) | 2.2 (1.6, 3.1)                                                                   | 4.5 (2.0, 7.7)                                                                          | 45 (32, 64)                                                     |
|                                             |       | 10                          | 3.5                  | 21                  | 0.98        | 0.979                | 0.576 (0.473, 0.671) | 2 (1.3, 2.8)                                                                     | 2 (0.2, 5.2)                                                                            | 50 (36, 74)                                                     |
|                                             | Women | 10                          | 0.2                  | 10                  | 0.90        | 0.908                | 0.901 (0.859, 0.938) | 0.2 (0.1, 0.8)                                                                   | 9.2 (6.3, 12.0)                                                                         | 529 (133, 1901)                                                 |
|                                             |       | 10                          | 0.2                  | 12                  | 0.95        | 0.947                | 0.864 (0.809, 0.915) | 0.2 (<0.1, 0.7)                                                                  | 5.3 (2.8, 8.0)                                                                          | 551 (141, 1998)                                                 |
|                                             |       | 10                          | 0.2                  | 15                  | 0.98        | 0.984                | 0.803 (0.721, 0.879) | 0.2 (<0.1, 0.7)                                                                  | 1.6 (0.1, 3.9)                                                                          | 593 (153, 2155)                                                 |
| Macedonia (the former Yugoslav Republic of) | Men   | 10                          | 5.5                  | 14                  | 0.90        | 0.902                | 0.747 (0.690, 0.795) | 4.1 (3.1, 5.4)                                                                   | 9.3 (6.6, 12.4)                                                                         | 24 (19, 33)                                                     |
|                                             |       | 10                          | 5.5                  | 18                  | 0.95        | 0.954                | 0.647 (0.564, 0.722) | 3.6 (2.7, 4.7)                                                                   | 4.4 (1.9, 7.6)                                                                          | 28 (21, 38)                                                     |
|                                             |       | 10                          | 5.5                  | 21                  | 0.98        | 0.979                | 0.576 (0.473, 0.671) | 3.2 (2.3, 4.3)                                                                   | 2 (0.2, 4.9)                                                                            | 31 (23, 44)                                                     |
|                                             | Women | 10                          | 1.4                  | 10                  | 0.90        | 0.908                | 0.901 (0.859, 0.938) | 1.2 (0.7, 2.0)                                                                   | 9.1 (6.2, 11.9)                                                                         | 82 (49, 142)                                                    |
|                                             |       | 10                          | 1.4                  | 12                  | 0.95        | 0.947                | 0.864 (0.809, 0.915) | 1.2 (0.7, 2.0)                                                                   | 5.2 (2.7, 7.9)                                                                          | 86 (51, 150)                                                    |
|                                             |       | 10                          | 1.4                  | 15                  | 0.98        | 0.984                | 0.803 (0.721, 0.879) | 1.1 (0.6, 1.8)                                                                   | 1.6 (0.1, 3.8)                                                                          | 92 (56, 163)                                                    |
| Timor-Leste                                 | Men   | 10                          | 1.2                  | 14                  | 0.90        | 0.902                | 0.747 (0.690, 0.795) | 0.9 (0.5, 1.5)                                                                   | 9.7 (6.9, 13.0)                                                                         | 116 (68, 211)                                                   |
|                                             |       | 10                          | 1.2                  | 18                  | 0.95        | 0.954                | 0.647 (0.564, 0.722) | 0.7 (0.4, 1.3)                                                                   | 4.6 (2.0, 7.9)                                                                          | 134 (77, 244)                                                   |
|                                             |       | 10                          | 1.2                  | 21                  | 0.98        | 0.979                | 0.576 (0.473, 0.671) | 0.7 (0.4, 1.2)                                                                   | 2.1 (0.2, 5.2)                                                                          | 151 (85, 276)                                                   |

| Country             | Sex   | Standard drink size (grams) | Prevalence (%) of AD | AUDIT cut-off score | Specificity | Specificity (actual) | Sensitivity (95% UI) | People who have AD and a positive AUDIT score [per 100 people screened] (95% UI) | People who do not have AD and a positive AUDIT score [per 100 people screened] (95% UI) | Number of people needed to screen to treat one AD case (95% UI) |
|---------------------|-------|-----------------------------|----------------------|---------------------|-------------|----------------------|----------------------|----------------------------------------------------------------------------------|-----------------------------------------------------------------------------------------|-----------------------------------------------------------------|
| Togo                | Women | 10                          | 0.2                  | 10                  | 0.90        | 0.908                | 0.901 (0.859, 0.938) | 0.2 (0.1, 0.8)                                                                   | 9.2 (6.3, 12.0)                                                                         | 519 (129, 1797)                                                 |
|                     |       | 10                          | 0.2                  | 12                  | 0.95        | 0.947                | 0.864 (0.809, 0.915) | 0.2 (0.1, 0.7)                                                                   | 5.3 (2.8, 8.0)                                                                          | 541 (136, 1879)                                                 |
|                     |       | 10                          | 0.2                  | 15                  | 0.98        | 0.984                | 0.803 (0.721, 0.879) | 0.2 (<0.1, 0.7)                                                                  | 1.6 (0.1, 3.9)                                                                          | 583 (146, 2043)                                                 |
|                     | Men   | 10                          | 5.1                  | 14                  | 0.90        | 0.902                | 0.747 (0.690, 0.795) | 3.8 (2.9, 5.1)                                                                   | 9.3 (6.7, 12.5)                                                                         | 26 (20, 34)                                                     |
|                     |       | 10                          | 5.1                  | 18                  | 0.95        | 0.954                | 0.647 (0.564, 0.722) | 3.3 (2.5, 4.4)                                                                   | 4.4 (2.0, 7.6)                                                                          | 30 (22, 40)                                                     |
|                     |       | 10                          | 5.1                  | 21                  | 0.98        | 0.979                | 0.576 (0.473, 0.671) | 3 (2.2, 4.0)                                                                     | 2 (0.2, 5.0)                                                                            | 34 (25, 46)                                                     |
|                     | Women | 10                          | 1.6                  | 10                  | 0.90        | 0.908                | 0.901 (0.859, 0.938) | 1.4 (0.9, 2.4)                                                                   | 9.1 (6.2, 11.8)                                                                         | 70 (41, 113)                                                    |
|                     |       | 10                          | 1.6                  | 12                  | 0.95        | 0.947                | 0.864 (0.809, 0.915) | 1.4 (0.8, 2.3)                                                                   | 5.2 (2.7, 7.9)                                                                          | 72 (43, 119)                                                    |
|                     |       | 10                          | 1.6                  | 15                  | 0.98        | 0.984                | 0.803 (0.721, 0.879) | 1.3 (0.8, 2.2)                                                                   | 1.6 (0.1, 3.8)                                                                          | 78 (46, 131)                                                    |
| Tonga               | Men   | 10                          | 5.1                  | 14                  | 0.90        | 0.902                | 0.747 (0.690, 0.795) | 3.8 (2.9, 5.0)                                                                   | 9.3 (6.7, 12.5)                                                                         | 26 (20, 35)                                                     |
|                     |       | 10                          | 5.1                  | 18                  | 0.95        | 0.954                | 0.647 (0.564, 0.722) | 3.3 (2.5, 4.5)                                                                   | 4.4 (2.0, 7.5)                                                                          | 30 (22, 41)                                                     |
|                     |       | 10                          | 5.1                  | 21                  | 0.98        | 0.979                | 0.576 (0.473, 0.671) | 2.9 (2.1, 4.0)                                                                   | 2 (0.2, 5.0)                                                                            | 34 (25, 47)                                                     |
|                     | Women | 10                          | 0.7                  | 10                  | 0.90        | 0.908                | 0.901 (0.859, 0.938) | 0.6 (0.3, 1.3)                                                                   | 9.2 (6.3, 12.0)                                                                         | 171 (78, 387)                                                   |
|                     |       | 10                          | 0.7                  | 12                  | 0.95        | 0.947                | 0.864 (0.809, 0.915) | 0.6 (0.2, 1.2)                                                                   | 5.3 (2.7, 8.0)                                                                          | 178 (81, 405)                                                   |
|                     |       | 10                          | 0.7                  | 15                  | 0.98        | 0.984                | 0.803 (0.721, 0.879) | 0.5 (0.2, 1.1)                                                                   | 1.6 (0.1, 3.8)                                                                          | 192 (87, 439)                                                   |
| Trinidad and Tobago | Men   | 10                          | 3.8                  | 14                  | 0.90        | 0.902                | 0.747 (0.690, 0.795) | 2.9 (2.1, 3.9)                                                                   | 9.5 (6.8, 12.6)                                                                         | 35 (25, 48)                                                     |

| Country | Sex   | Standard drink size (grams) | Prevalence (%) of AD | AUDIT cut-off score | Specificity | Specificity (actual) | Sensitivity (95% UI) | People who have AD and a positive AUDIT score [per 100 people screened] (95% UI) | People who do not have AD and a positive AUDIT score [per 100 people screened] (95% UI) | Number of people needed to screen to treat one AD case (95% UI) |
|---------|-------|-----------------------------|----------------------|---------------------|-------------|----------------------|----------------------|----------------------------------------------------------------------------------|-----------------------------------------------------------------------------------------|-----------------------------------------------------------------|
| Tunisia | Women | 10                          | 3.8                  | 18                  | 0.95        | 0.954                | 0.647 (0.564, 0.722) | 2.5 (1.8, 3.4)                                                                   | 4.4 (2.0, 7.7)                                                                          | 40 (29, 56)                                                     |
|         |       | 10                          | 3.8                  | 21                  | 0.98        | 0.979                | 0.576 (0.473, 0.671) | 2.2 (1.5, 3.1)                                                                   | 2 (0.2, 5.1)                                                                            | 45 (32, 65)                                                     |
|         |       | 10                          | 1.8                  | 10                  | 0.90        | 0.908                | 0.901 (0.859, 0.938) | 1.6 (1.0, 2.6)                                                                   | 9.1 (6.2, 11.8)                                                                         | 62 (38, 99)                                                     |
|         |       | 10                          | 1.8                  | 12                  | 0.95        | 0.947                | 0.864 (0.809, 0.915) | 1.5 (1.0, 2.5)                                                                   | 5.2 (2.7, 7.9)                                                                          | 65 (40, 103)                                                    |
|         |       | 10                          | 1.8                  | 15                  | 0.98        | 0.984                | 0.803 (0.721, 0.879) | 1.4 (0.9, 2.4)                                                                   | 1.6 (0.1, 3.8)                                                                          | 70 (42, 111)                                                    |
|         | Men   | 10                          | 0.3                  | 14                  | 0.90        | 0.902                | 0.747 (0.690, 0.795) | 0.3 (0.1, 0.7)                                                                   | 9.8 (7.0, 13.1)                                                                         | 394 (139, 1144)                                                 |
|         |       | 10                          | 0.3                  | 18                  | 0.95        | 0.954                | 0.647 (0.564, 0.722) | 0.2 (0.1, 0.6)                                                                   | 4.6 (2.0, 8.0)                                                                          | 454 (162, 1319)                                                 |
|         |       | 10                          | 0.3                  | 21                  | 0.98        | 0.979                | 0.576 (0.473, 0.671) | 0.2 (0.1, 0.5)                                                                   | 2.1 (0.2, 5.3)                                                                          | 511 (183, 1460)                                                 |
|         |       | 10                          | 0.1                  | 10                  | 0.90        | 0.908                | 0.901 (0.859, 0.938) | 0.1 (<0.1, 0.6)                                                                  | 9.2 (6.3, 12.0)                                                                         | 1388 (160, 13204)                                               |
|         |       | 10                          | 0.1                  | 12                  | 0.95        | 0.947                | 0.864 (0.809, 0.915) | 0.1 (<0.1, 0.6)                                                                  | 5.3 (2.8, 8.0)                                                                          | 1446 (166, 13654)                                               |
| Turkey  | Men   | 10                          | 0.1                  | 15                  | 0.98        | 0.984                | 0.803 (0.721, 0.879) | 0.1 (<0.1, 0.6)                                                                  | 1.6 (0.1, 3.9)                                                                          | 1557 (178, 14783)                                               |
|         |       | 10                          | 2.5                  | 14                  | 0.90        | 0.902                | 0.747 (0.690, 0.795) | 1.9 (1.2, 2.7)                                                                   | 9.6 (6.8, 12.8)                                                                         | 54 (37, 85)                                                     |
|         |       | 10                          | 2.5                  | 18                  | 0.95        | 0.954                | 0.647 (0.564, 0.722) | 1.6 (1.0, 2.4)                                                                   | 4.5 (2.0, 7.8)                                                                          | 62 (42, 98)                                                     |
|         | Women | 10                          | 2.5                  | 21                  | 0.98        | 0.979                | 0.576 (0.473, 0.671) | 1.4 (0.9, 2.2)                                                                   | 2.1 (0.2, 5.2)                                                                          | 69 (46, 111)                                                    |
|         |       | 10                          | 0.7                  | 10                  | 0.90        | 0.908                | 0.901 (0.859, 0.938) | 0.6 (0.3, 1.3)                                                                   | 9.2 (6.3, 11.9)                                                                         | 159 (78, 321)                                                   |
|         |       | 10                          | 0.7                  | 12                  | 0.95        | 0.947                | 0.864 (0.809, 0.915) | 0.6 (0.3, 1.2)                                                                   | 5.3 (2.8, 7.9)                                                                          | 165 (81, 335)                                                   |

| Country      | Sex   | Standard drink size (grams) | Prevalence (%) of AD | AUDIT cut-off score | Specificity | Specificity (actual) | Sensitivity (95% UI) | People who have AD and a positive AUDIT score [per 100 people screened] (95% UI) | People who do not have AD and a positive AUDIT score [per 100 people screened] (95% UI) | Number of people needed to screen to treat one AD case (95% UI) |
|--------------|-------|-----------------------------|----------------------|---------------------|-------------|----------------------|----------------------|----------------------------------------------------------------------------------|-----------------------------------------------------------------------------------------|-----------------------------------------------------------------|
| Turkmenistan | Men   | 10                          | 0.7                  | 15                  | 0.98        | 0.984                | 0.803 (0.721, 0.879) | 0.6 (0.3, 1.2)                                                                   | 1.6 (0.1, 3.8)                                                                          | 178 (86, 373)                                                   |
|              |       | 10                          | 5.3                  | 14                  | 0.90        | 0.902                | 0.747 (0.690, 0.795) | 4 (3.0, 5.3)                                                                     | 9.3 (6.6, 12.4)                                                                         | 25 (19, 33)                                                     |
|              |       | 10                          | 5.3                  | 18                  | 0.95        | 0.954                | 0.647 (0.564, 0.722) | 3.5 (2.6, 4.6)                                                                   | 4.4 (1.9, 7.5)                                                                          | 29 (22, 39)                                                     |
|              | Women | 10                          | 5.3                  | 21                  | 0.98        | 0.979                | 0.576 (0.473, 0.671) | 3.1 (2.2, 4.2)                                                                   | 2 (0.2, 5.0)                                                                            | 33 (24, 45)                                                     |
|              |       | 10                          | 1.3                  | 10                  | 0.90        | 0.908                | 0.901 (0.859, 0.938) | 1.2 (0.7, 2.1)                                                                   | 9.1 (6.2, 11.9)                                                                         | 83 (48, 143)                                                    |
|              |       | 10                          | 1.3                  | 12                  | 0.95        | 0.947                | 0.864 (0.809, 0.915) | 1.2 (0.7, 2.0)                                                                   | 5.2 (2.7, 7.9)                                                                          | 86 (50, 148)                                                    |
| Tuvalu       | Men   | 10                          | 1.3                  | 15                  | 0.98        | 0.984                | 0.803 (0.721, 0.879) | 1.1 (0.6, 1.9)                                                                   | 1.6 (0.1, 3.8)                                                                          | 93 (54, 160)                                                    |
|              |       | 10                          | 5.2                  | 14                  | 0.90        | 0.902                | 0.747 (0.690, 0.795) | 3.9 (2.9, 5.1)                                                                   | 9.3 (6.6, 12.5)                                                                         | 26 (19, 34)                                                     |
|              |       | 10                          | 5.2                  | 18                  | 0.95        | 0.954                | 0.647 (0.564, 0.722) | 3.4 (2.5, 4.5)                                                                   | 4.4 (1.9, 7.5)                                                                          | 29 (22, 40)                                                     |
|              | Women | 10                          | 5.2                  | 21                  | 0.98        | 0.979                | 0.576 (0.473, 0.671) | 3 (2.2, 4.1)                                                                     | 2 (0.2, 5.0)                                                                            | 33 (25, 46)                                                     |
|              |       | 10                          | 0.7                  | 10                  | 0.90        | 0.908                | 0.901 (0.859, 0.938) | 0.6 (0.3, 1.3)                                                                   | 9.2 (6.3, 11.9)                                                                         | 168 (76, 351)                                                   |
|              |       | 10                          | 0.7                  | 12                  | 0.95        | 0.947                | 0.864 (0.809, 0.915) | 0.6 (0.3, 1.3)                                                                   | 5.3 (2.7, 7.9)                                                                          | 175 (79, 367)                                                   |
| Uganda       | Men   | 10                          | 0.7                  | 15                  | 0.98        | 0.984                | 0.803 (0.721, 0.879) | 0.5 (0.2, 1.2)                                                                   | 1.6 (0.1, 3.9)                                                                          | 189 (85, 402)                                                   |
|              |       | 10                          | 4.2                  | 14                  | 0.90        | 0.902                | 0.747 (0.690, 0.795) | 3.2 (2.3, 4.2)                                                                   | 9.4 (6.7, 12.6)                                                                         | 32 (24, 43)                                                     |
|              |       | 10                          | 4.2                  | 18                  | 0.95        | 0.954                | 0.647 (0.564, 0.722) | 2.7 (1.9, 3.7)                                                                   | 4.4 (2.0, 7.6)                                                                          | 37 (27, 51)                                                     |
|              |       | 10                          | 4.2                  | 21                  | 0.98        | 0.979                | 0.576 (0.473, 0.671) | 2.4 (1.7, 3.3)                                                                   | 2 (0.2, 5.1)                                                                            | 41 (30, 59)                                                     |

| Country              | Sex   | Standard drink size (grams) | Prevalence (%) of AD | AUDIT cut-off score | Specificity | Specificity (actual) | Sensitivity (95% UI) | People who have AD and a positive AUDIT score [per 100 people screened] (95% UI) | People who do not have AD and a positive AUDIT score [per 100 people screened] (95% UI) | Number of people needed to screen to treat one AD case (95% UI) |
|----------------------|-------|-----------------------------|----------------------|---------------------|-------------|----------------------|----------------------|----------------------------------------------------------------------------------|-----------------------------------------------------------------------------------------|-----------------------------------------------------------------|
| Ukraine              | Women | 10                          | 0.7                  | 10                  | 0.90        | 0.908                | 0.901 (0.859, 0.938) | 0.7 (0.3, 1.4)                                                                   | 9.2 (6.3, 11.9)                                                                         | 151 (71, 306)                                                   |
|                      |       | 10                          | 0.7                  | 12                  | 0.95        | 0.947                | 0.864 (0.809, 0.915) | 0.6 (0.3, 1.3)                                                                   | 5.3 (2.7, 7.9)                                                                          | 158 (74, 321)                                                   |
|                      |       | 10                          | 0.7                  | 15                  | 0.98        | 0.984                | 0.803 (0.721, 0.879) | 0.6 (0.3, 1.3)                                                                   | 1.6 (0.1, 3.8)                                                                          | 170 (80, 349)                                                   |
|                      | Men   | 10                          | 4.2                  | 14                  | 0.90        | 0.902                | 0.747 (0.690, 0.795) | 3.2 (2.3, 4.2)                                                                   | 9.4 (6.7, 12.6)                                                                         | 32 (24, 43)                                                     |
|                      |       | 10                          | 4.2                  | 18                  | 0.95        | 0.954                | 0.647 (0.564, 0.722) | 2.7 (2.0, 3.6)                                                                   | 4.4 (2.0, 7.6)                                                                          | 36 (28, 50)                                                     |
|                      |       | 10                          | 4.2                  | 21                  | 0.98        | 0.979                | 0.576 (0.473, 0.671) | 2.4 (1.7, 3.3)                                                                   | 2 (0.2, 5.1)                                                                            | 41 (30, 58)                                                     |
| United Arab Emirates | Women | 10                          | 0.5                  | 10                  | 0.90        | 0.908                | 0.901 (0.859, 0.938) | 0.5 (0.2, 1.2)                                                                   | 9.2 (6.3, 11.9)                                                                         | 210 (87, 499)                                                   |
|                      |       | 10                          | 0.5                  | 12                  | 0.95        | 0.947                | 0.864 (0.809, 0.915) | 0.5 (0.2, 1.1)                                                                   | 5.3 (2.7, 8.0)                                                                          | 218 (90, 527)                                                   |
|                      |       | 10                          | 0.5                  | 15                  | 0.98        | 0.984                | 0.803 (0.721, 0.879) | 0.4 (0.2, 1.0)                                                                   | 1.6 (0.1, 3.9)                                                                          | 235 (97, 572)                                                   |
|                      | Men   | 10                          | 0.3                  | 14                  | 0.90        | 0.902                | 0.747 (0.690, 0.795) | 0.2 (0.1, 0.7)                                                                   | 9.8 (7.0, 13.1)                                                                         | 419 (140, 1299)                                                 |
|                      |       | 10                          | 0.3                  | 18                  | 0.95        | 0.954                | 0.647 (0.564, 0.722) | 0.2 (0.1, 0.6)                                                                   | 4.6 (2.1, 8.0)                                                                          | 484 (159, 1500)                                                 |
|                      |       | 10                          | 0.3                  | 21                  | 0.98        | 0.979                | 0.576 (0.473, 0.671) | 0.2 (0.1, 0.6)                                                                   | 2.1 (0.2, 5.3)                                                                          | 544 (177, 1655)                                                 |
|                      | Women | 10                          | 0.1                  | 10                  | 0.90        | 0.908                | 0.901 (0.859, 0.938) | 0.1 (<0.1, 0.7)                                                                  | 9.2 (6.3, 12.0)                                                                         | 1920 (149, 22117)                                               |
|                      |       | 10                          | 0.1                  | 12                  | 0.95        | 0.947                | 0.864 (0.809, 0.915) | <0.1 (<0.1, 0.7)                                                                 | 5.3 (2.8, 8.0)                                                                          | 2000 (153, 23532)                                               |
|                      |       | 10                          | 0.1                  | 15                  | 0.98        | 0.984                | 0.803 (0.721, 0.879) | <0.1 (<0.1, 0.6)                                                                 | 1.6 (0.1, 3.9)                                                                          | 2153 (161, 25810)                                               |

| Country                                              | Sex   | Standard drink size (grams) | Prevalence (%) of AD | AUDIT cut-off score | Specificity | Specificity (actual) | Sensitivity (95% UI) | People who have AD and a positive AUDIT score [per 100 people screened] (95% UI) | People who do not have AD and a positive AUDIT score [per 100 people screened] (95% UI) | Number of people needed to screen to treat one AD case (95% UI) |
|------------------------------------------------------|-------|-----------------------------|----------------------|---------------------|-------------|----------------------|----------------------|----------------------------------------------------------------------------------|-----------------------------------------------------------------------------------------|-----------------------------------------------------------------|
| United Kingdom of Great Britain and Northern Ireland | Men   | 8                           | 2.2                  | 14                  | 0.90        | 0.903                | 0.75 (0.662, 0.827)  | 1.6 (1.1, 2.5)                                                                   | 9.5 (5.5, 14.2)                                                                         | 61 (40, 91)                                                     |
|                                                      |       | 8                           | 2.2                  | 18                  | 0.95        | 0.955                | 0.651 (0.538, 0.746) | 1.4 (0.9, 2.2)                                                                   | 4.4 (1.4, 8.8)                                                                          | 70 (45, 108)                                                    |
|                                                      |       | 8                           | 2.2                  | 21                  | 0.98        | 0.979                | 0.579 (0.452, 0.693) | 1.3 (0.8, 2.1)                                                                   | 2 (<0.1, 5.7)                                                                           | 79 (49, 126)                                                    |
|                                                      | Women | 8                           | 0.7                  | 12                  | 0.90        | 0.908                | 0.961 (0.892, 0.999) | 0.6 (0.3, 1.4)                                                                   | 9.1 (4.1, 14.5)                                                                         | 157 (73, 345)                                                   |
|                                                      |       | 8                           | 0.7                  | 14                  | 0.95        | 0.945                | 0.934 (0.849, 0.991) | 0.6 (0.3, 1.3)                                                                   | 5.5 (1.5, 10.5)                                                                         | 162 (76, 352)                                                   |
|                                                      |       | 8                           | 0.7                  | 17                  | 0.98        | 0.981                | 0.885 (0.770, 0.972) | 0.6 (0.3, 1.3)                                                                   | 1.9 (<0.1, 6.0)                                                                         | 171 (79, 370)                                                   |
| Tanzania, United Republic of                         | Men   | 10                          | 3.9                  | 14                  | 0.90        | 0.902                | 0.747 (0.690, 0.795) | 2.9 (2.1, 3.9)                                                                   | 9.4 (6.8, 12.6)                                                                         | 34 (26, 47)                                                     |
|                                                      |       | 10                          | 3.9                  | 18                  | 0.95        | 0.954                | 0.647 (0.564, 0.722) | 2.5 (1.8, 3.5)                                                                   | 4.4 (2.0, 7.7)                                                                          | 39 (29, 56)                                                     |
|                                                      |       | 10                          | 3.9                  | 21                  | 0.98        | 0.979                | 0.576 (0.473, 0.671) | 2.3 (1.6, 3.1)                                                                   | 2 (0.2, 5.1)                                                                            | 44 (32, 64)                                                     |
|                                                      | Women | 10                          | 0.9                  | 10                  | 0.90        | 0.908                | 0.901 (0.859, 0.938) | 0.8 (0.4, 1.5)                                                                   | 9.2 (6.3, 11.9)                                                                         | 125 (67, 239)                                                   |
|                                                      |       | 10                          | 0.9                  | 12                  | 0.95        | 0.947                | 0.864 (0.809, 0.915) | 0.8 (0.4, 1.4)                                                                   | 5.3 (2.7, 7.9)                                                                          | 130 (70, 250)                                                   |
|                                                      |       | 10                          | 0.9                  | 15                  | 0.98        | 0.984                | 0.803 (0.721, 0.879) | 0.7 (0.4, 1.3)                                                                   | 1.6 (0.1, 3.8)                                                                          | 140 (76, 270)                                                   |
| United States of America                             | Men   | 14                          | 9.9                  | 14                  | 0.90        | 0.899                | 0.741 (0.668, 0.800) | 7.3 (5.9, 9.0)                                                                   | 9.1 (6.2, 12.6)                                                                         | 14 (11, 17)                                                     |
|                                                      |       | 14                          | 9.9                  | 18                  | 0.95        | 0.952                | 0.641 (0.549, 0.722) | 6.3 (4.9, 7.8)                                                                   | 4.3 (2.0, 7.7)                                                                          | 16 (13, 20)                                                     |

| Country    | Sex   | Standard drink size (grams) | Prevalence (%) of AD | AUDIT cut-off score | Specificity | Specificity (actual) | Sensitivity (95% UI) | People who have AD and a positive AUDIT score [per 100 people screened] (95% UI) | People who do not have AD and a positive AUDIT score [per 100 people screened] (95% UI) | Number of people needed to screen to treat one AD case (95% UI) |              |
|------------|-------|-----------------------------|----------------------|---------------------|-------------|----------------------|----------------------|----------------------------------------------------------------------------------|-----------------------------------------------------------------------------------------|-----------------------------------------------------------------|--------------|
| Uruguay    | Women | 14                          | 9.9                  | 21                  | 0.98        | 0.978                | 0.569 (0.460, 0.667) | 5.6 (4.2, 7.1)                                                                   | 2 (0.3, 5.2)                                                                            | 18 (14, 24)                                                     |              |
|            |       | 14                          | 5.5                  | 6                   | 0.90        | 0.889                | 0.73 (0.630, 0.821)  | 4 (3.0, 5.3)                                                                     | 10.4 (6.6, 15.6)                                                                        | 25 (19, 33)                                                     |              |
|            |       | 14                          | 5.5                  | 8                   | 0.95        | 0.942                | 0.681 (0.587, 0.767) | 3.8 (2.8, 5.0)                                                                   | 5.5 (2.9, 9.1)                                                                          | 27 (20, 35)                                                     |              |
|            |       | 14                          | 5.5                  | 10                  | 0.98        | 0.975                | 0.63 (0.535, 0.714)  | 3.5 (2.6, 4.6)                                                                   | 2.3 (0.7, 4.9)                                                                          | 29 (22, 38)                                                     |              |
|            | Men   | 10                          | 3.8                  | 14                  | 0.90        | 0.902                | 0.747 (0.690, 0.795) | 2.8 (2.0, 3.8)                                                                   | 9.5 (6.7, 12.6)                                                                         | 36 (26, 49)                                                     |              |
|            |       | 10                          | 3.8                  | 18                  | 0.95        | 0.954                | 0.647 (0.564, 0.722) | 2.4 (1.7, 3.4)                                                                   | 4.5 (2.0, 7.7)                                                                          | 41 (30, 58)                                                     |              |
|            |       | 10                          | 3.8                  | 21                  | 0.98        | 0.979                | 0.576 (0.473, 0.671) | 2.2 (1.5, 3.0)                                                                   | 2 (0.2, 5.1)                                                                            | 46 (33, 67)                                                     |              |
|            |       | Women                       | 10                   | 1.7                 | 10          | 0.90                 | 0.908                | 0.901 (0.859, 0.938)                                                             | 1.5 (1.0, 2.5)                                                                          | 9.1 (6.2, 11.8)                                                 | 66 (41, 104) |
|            |       |                             | 10                   | 1.7                 | 12          | 0.95                 | 0.947                | 0.864 (0.809, 0.915)                                                             | 1.5 (0.9, 2.4)                                                                          | 5.2 (2.7, 7.9)                                                  | 69 (42, 110) |
|            |       | 10                          | 1.7                  | 15                  | 0.98        | 0.984                | 0.803 (0.721, 0.879) | 1.3 (0.8, 2.2)                                                                   | 1.6 (0.1, 3.8)                                                                          | 74 (45, 118)                                                    |              |
| Uzbekistan | Men   | 10                          | 5.3                  | 14                  | 0.90        | 0.902                | 0.747 (0.690, 0.795) | 4 (3.1, 5.1)                                                                     | 9.3 (6.6, 12.5)                                                                         | 25 (19, 32)                                                     |              |
|            |       | 10                          | 5.3                  | 18                  | 0.95        | 0.954                | 0.647 (0.564, 0.722) | 3.4 (2.6, 4.5)                                                                   | 4.4 (2.0, 7.5)                                                                          | 29 (22, 38)                                                     |              |
|            |       | 10                          | 5.3                  | 21                  | 0.98        | 0.979                | 0.576 (0.473, 0.671) | 3.1 (2.3, 4.1)                                                                   | 2 (0.2, 5.0)                                                                            | 33 (24, 44)                                                     |              |
|            | Women | 10                          | 1.3                  | 10                  | 0.90        | 0.908                | 0.901 (0.859, 0.938) | 1.2 (0.7, 2.0)                                                                   | 9.1 (6.2, 11.9)                                                                         | 83 (49, 146)                                                    |              |
|            |       | 10                          | 1.3                  | 12                  | 0.95        | 0.947                | 0.864 (0.809, 0.915) | 1.2 (0.7, 2.0)                                                                   | 5.2 (2.7, 7.9)                                                                          | 86 (50, 150)                                                    |              |
|            |       | 10                          | 1.3                  | 15                  | 0.98        | 0.984                | 0.803 (0.721, 0.879) | 1.1 (0.6, 1.9)                                                                   | 1.6 (0.1, 3.8)                                                                          | 93 (54, 164)                                                    |              |



| Country                            | Sex   | Standard drink size (grams) | Prevalence (%) of AD | AUDIT cut-off score | Specificity | Specificity (actual) | Sensitivity (95% UI) | People who have AD and a positive AUDIT score [per 100 people screened] (95% UI) | People who do not have AD and a positive AUDIT score [per 100 people screened] (95% UI) | Number of people needed to screen to treat one AD case (95% UI) |
|------------------------------------|-------|-----------------------------|----------------------|---------------------|-------------|----------------------|----------------------|----------------------------------------------------------------------------------|-----------------------------------------------------------------------------------------|-----------------------------------------------------------------|
| Vanuatu                            | Men   | 10                          | 5.1                  | 14                  | 0.90        | 0.902                | 0.747 (0.690, 0.795) | 3.8 (2.8, 5.0)                                                                   | 9.3 (6.7, 12.5)                                                                         | 26 (20, 35)                                                     |
|                                    |       | 10                          | 5.1                  | 18                  | 0.95        | 0.954                | 0.647 (0.564, 0.722) | 3.3 (2.4, 4.5)                                                                   | 4.4 (2.0, 7.6)                                                                          | 30 (22, 42)                                                     |
|                                    |       | 10                          | 5.1                  | 21                  | 0.98        | 0.979                | 0.576 (0.473, 0.671) | 2.9 (2.1, 4.0)                                                                   | 2 (0.2, 5.0)                                                                            | 34 (25, 48)                                                     |
|                                    | Women | 10                          | 0.7                  | 10                  | 0.90        | 0.908                | 0.901 (0.859, 0.938) | 0.6 (0.3, 1.3)                                                                   | 9.2 (6.3, 12.0)                                                                         | 166 (78, 353)                                                   |
|                                    |       | 10                          | 0.7                  | 12                  | 0.95        | 0.947                | 0.864 (0.809, 0.915) | 0.6 (0.3, 1.2)                                                                   | 5.3 (2.7, 7.9)                                                                          | 173 (82, 365)                                                   |
|                                    |       | 10                          | 0.7                  | 15                  | 0.98        | 0.984                | 0.803 (0.721, 0.879) | 0.5 (0.3, 1.1)                                                                   | 1.6 (0.1, 3.8)                                                                          | 186 (88, 389)                                                   |
| Venezuela (Bolivarian Republic of) | Men   | 10                          | 3.9                  | 14                  | 0.90        | 0.902                | 0.747 (0.690, 0.795) | 2.9 (2.1, 3.9)                                                                   | 9.4 (6.8, 12.6)                                                                         | 35 (26, 48)                                                     |
|                                    |       | 10                          | 3.9                  | 18                  | 0.95        | 0.954                | 0.647 (0.564, 0.722) | 2.5 (1.8, 3.5)                                                                   | 4.4 (2.0, 7.7)                                                                          | 40 (29, 56)                                                     |
|                                    |       | 10                          | 3.9                  | 21                  | 0.98        | 0.979                | 0.576 (0.473, 0.671) | 2.2 (1.5, 3.1)                                                                   | 2 (0.2, 5.1)                                                                            | 45 (32, 65)                                                     |
|                                    | Women | 10                          | 1.8                  | 10                  | 0.90        | 0.908                | 0.901 (0.859, 0.938) | 1.6 (1.1, 2.7)                                                                   | 9.1 (6.2, 11.8)                                                                         | 61 (37, 94)                                                     |
|                                    |       | 10                          | 1.8                  | 12                  | 0.95        | 0.947                | 0.864 (0.809, 0.915) | 1.6 (1.0, 2.6)                                                                   | 5.2 (2.7, 7.9)                                                                          | 64 (39, 99)                                                     |
|                                    |       | 10                          | 1.8                  | 15                  | 0.98        | 0.984                | 0.803 (0.721, 0.879) | 1.5 (0.9, 2.4)                                                                   | 1.6 (0.1, 3.8)                                                                          | 68 (41, 108)                                                    |
| Viet Nam                           | Men   | 10                          | 5.9                  | 14                  | 0.90        | 0.902                | 0.747 (0.690, 0.795) | 4.4 (3.4, 5.7)                                                                   | 9.2 (6.6, 12.3)                                                                         | 23 (18, 30)                                                     |
|                                    |       | 10                          | 5.9                  | 18                  | 0.95        | 0.954                | 0.647 (0.564, 0.722) | 3.8 (2.8, 5.0)                                                                   | 4.4 (1.9, 7.6)                                                                          | 26 (20, 35)                                                     |
|                                    |       | 10                          | 5.9                  | 21                  | 0.98        | 0.979                | 0.576 (0.473, 0.671) | 3.4 (2.4, 4.6)                                                                   | 2 (0.2, 5.0)                                                                            | 29 (22, 41)                                                     |
|                                    | Women | 10                          | 0.1                  | 10                  | 0.90        | 0.908                | 0.901 (0.859, 0.938) | 0.1 (<0.1, 0.7)                                                                  | 9.2 (6.3, 12.0)                                                                         | 1234 (147, 10987)                                               |

| Country  | Sex   | Standard drink size (grams) | Prevalence (%) of AD | AUDIT cut-off score | Specificity | Specificity (actual) | Sensitivity (95% UI) | People who have AD and a positive AUDIT score [per 100 people screened] (95% UI) | People who do not have AD and a positive AUDIT score [per 100 people screened] (95% UI) | Number of people needed to screen to treat one AD case (95% UI) |
|----------|-------|-----------------------------|----------------------|---------------------|-------------|----------------------|----------------------|----------------------------------------------------------------------------------|-----------------------------------------------------------------------------------------|-----------------------------------------------------------------|
| Yemen    | Men   | 10                          | 0.1                  | 12                  | 0.95        | 0.947                | 0.864 (0.809, 0.915) | 0.1 (<0.1, 0.7)                                                                  | 5.3 (2.8, 8.0)                                                                          | 1286 (153, 11599)                                               |
|          |       | 10                          | 0.1                  | 15                  | 0.98        | 0.984                | 0.803 (0.721, 0.879) | 0.1 (<0.1, 0.6)                                                                  | 1.6 (0.1, 3.9)                                                                          | 1384 (164, 12808)                                               |
|          |       | 10                          | 0.3                  | 14                  | 0.90        | 0.902                | 0.747 (0.690, 0.795) | 0.2 (0.1, 0.7)                                                                   | 9.8 (7.0, 13.1)                                                                         | 418 (135, 1282)                                                 |
|          | Women | 10                          | 0.3                  | 18                  | 0.95        | 0.954                | 0.647 (0.564, 0.722) | 0.2 (0.1, 0.6)                                                                   | 4.6 (2.0, 8.0)                                                                          | 483 (157, 1526)                                                 |
|          |       | 10                          | 0.3                  | 21                  | 0.98        | 0.979                | 0.576 (0.473, 0.671) | 0.2 (0.1, 0.6)                                                                   | 2.1 (0.2, 5.3)                                                                          | 543 (178, 1751)                                                 |
|          |       | 10                          | 0.1                  | 10                  | 0.90        | 0.908                | 0.901 (0.859, 0.938) | 0.1 (<0.1, 0.7)                                                                  | 9.2 (6.3, 12.0)                                                                         | 1388 (147, 12720)                                               |
| Zambia   | Men   | 10                          | 0.1                  | 12                  | 0.95        | 0.947                | 0.864 (0.809, 0.915) | 0.1 (<0.1, 0.7)                                                                  | 5.3 (2.8, 8.0)                                                                          | 1446 (153, 13249)                                               |
|          |       | 10                          | 0.1                  | 15                  | 0.98        | 0.984                | 0.803 (0.721, 0.879) | 0.1 (<0.1, 0.6)                                                                  | 1.6 (0.1, 3.9)                                                                          | 1557 (164, 14043)                                               |
|          |       | 10                          | 3.3                  | 14                  | 0.90        | 0.902                | 0.747 (0.690, 0.795) | 2.5 (1.7, 3.5)                                                                   | 9.5 (6.8, 12.6)                                                                         | 40 (28, 57)                                                     |
|          | Women | 10                          | 3.3                  | 18                  | 0.95        | 0.954                | 0.647 (0.564, 0.722) | 2.2 (1.5, 3.1)                                                                   | 4.5 (2.0, 7.7)                                                                          | 46 (32, 66)                                                     |
|          |       | 10                          | 3.3                  | 21                  | 0.98        | 0.979                | 0.576 (0.473, 0.671) | 1.9 (1.3, 2.8)                                                                   | 2 (0.2, 5.1)                                                                            | 52 (36, 76)                                                     |
|          |       | 10                          | 0.5                  | 10                  | 0.90        | 0.908                | 0.901 (0.859, 0.938) | 0.4 (0.2, 1.1)                                                                   | 9.2 (6.3, 11.9)                                                                         | 237 (90, 591)                                                   |
| Zimbabwe | Men   | 10                          | 0.5                  | 12                  | 0.95        | 0.947                | 0.864 (0.809, 0.915) | 0.4 (0.2, 1.1)                                                                   | 5.3 (2.7, 8.0)                                                                          | 247 (94, 611)                                                   |
|          |       | 10                          | 0.5                  | 15                  | 0.98        | 0.984                | 0.803 (0.721, 0.879) | 0.4 (0.2, 1.0)                                                                   | 1.6 (0.1, 3.8)                                                                          | 266 (101, 661)                                                  |
|          | Men   | 10                          | 3.8                  | 14                  | 0.90        | 0.902                | 0.747 (0.690, 0.795) | 2.8 (2.1, 3.8)                                                                   | 9.5 (6.8, 12.6)                                                                         | 35 (26, 48)                                                     |
|          |       | 10                          | 3.8                  | 18                  | 0.95        | 0.954                | 0.647 (0.564, 0.722) | 2.4 (1.8, 3.3)                                                                   | 4.5 (2.0, 7.7)                                                                          | 41 (30, 56)                                                     |

| Country | Sex   | Standard drink size (grams) | Prevalence (%) of AD | AUDIT cut-off score | Specificity | Specificity (actual) | Sensitivity (95% UI) | People who have AD and a positive AUDIT score [per 100 people screened] (95% UI) | People who do not have AD and a positive AUDIT score [per 100 people screened] (95% UI) | Number of people needed to screen to treat one AD case (95% UI) |
|---------|-------|-----------------------------|----------------------|---------------------|-------------|----------------------|----------------------|----------------------------------------------------------------------------------|-----------------------------------------------------------------------------------------|-----------------------------------------------------------------|
|         |       | 10                          | 3.8                  | 21                  | 0.98        | 0.979                | 0.576 (0.473, 0.671) | 2.2 (1.5, 3.0)                                                                   | 2 (0.2, 5.1)                                                                            | 46 (34, 65)                                                     |
|         | Women | 10                          | 0.8                  | 10                  | 0.90        | 0.908                | 0.901 (0.859, 0.938) | 0.7 (0.4, 1.5)                                                                   | 9.2 (6.3, 11.9)                                                                         | 141 (66, 277)                                                   |
|         |       | 10                          | 0.8                  | 12                  | 0.95        | 0.947                | 0.864 (0.809, 0.915) | 0.7 (0.3, 1.4)                                                                   | 5.3 (2.7, 7.9)                                                                          | 147 (70, 287)                                                   |
|         |       | 10                          | 0.8                  | 15                  | 0.98        | 0.984                | 0.803 (0.721, 0.879) | 0.6 (0.3, 1.3)                                                                   | 1.6 (0.1, 3.8)                                                                          | 158 (74, 317)                                                   |

AUD: alcohol use disorders; AUDIT: Alcohol Use Disorders Identification Test; UI: Uncertainty Interval

**eTable 7. Statistical models for estimating the sensitivity and specificity of the AUDIT as a screening instrument for alcohol use disorders and alcohol dependence**

| Disorder/statistic/sex | Observations | Beta coefficients‡ |                 |                                | Model fit statistics    |                |         |         |
|------------------------|--------------|--------------------|-----------------|--------------------------------|-------------------------|----------------|---------|---------|
|                        |              | Intercept          | AUDIT cut-point | AUDIT cut-point <sup>0.5</sup> | Standard drink (grams)† | R <sup>2</sup> | AIC     | BIC     |
| Alcohol use disorders  |              |                    |                 |                                |                         |                |         |         |
| Sensitivity            |              |                    |                 |                                |                         |                |         |         |
| Men                    | 144          | 1.359              | -               | -0.062                         | -0.021                  | 0.08           | -39.38  | -27.50  |
| Women                  | 115          | 1.512              | -               | -0.136                         | -0.030                  | 0.18           | -77.50  | -66.52  |
| Specificity            |              |                    |                 |                                |                         |                |         |         |
| Men                    | 144          | 0.423              | -               | 0.227                          | 0.016                   | 0.62           | -137.14 | -125.26 |
| Women                  | 115          | 0.491              | -               | 0.278                          | -0.002 *                | 0.62           | -66.10  | -55.12  |
| Alcohol dependence     |              |                    |                 |                                |                         |                |         |         |
| Sensitivity            |              |                    |                 |                                |                         |                |         |         |
| Men                    | 76           | 1.826              | -               | -0.211                         | -0.002 *                | 0.37           | -44.07  | -34.75  |
| Women                  | 65           | 1.471              | -0.025          | -                              | -0.077                  | 0.42           | -33.78  | -25.08  |
| Specificity            |              |                    |                 |                                |                         |                |         |         |
| Men                    | 76           | 0.501              | -               | 0.200                          | -0.001 *                | 0.42           | -80.14  | -70.81  |
| Women                  | 65           | 0.479              | -               | 0.246                          | 0.036                   | 0.61           | -58.78  | -50.08  |

\* p value was not significant (i.e.,  $p > 0.05$ )

† Corrected by centering the value on 10 grams

‡ Regression models were constructed using data which underwent a Freeman-Tukey Double arcsine transformation

AIC: Akaike information criterion; AUDIT: Alcohol Use Disorder Identification Test; BIC: Bayesian information criterion

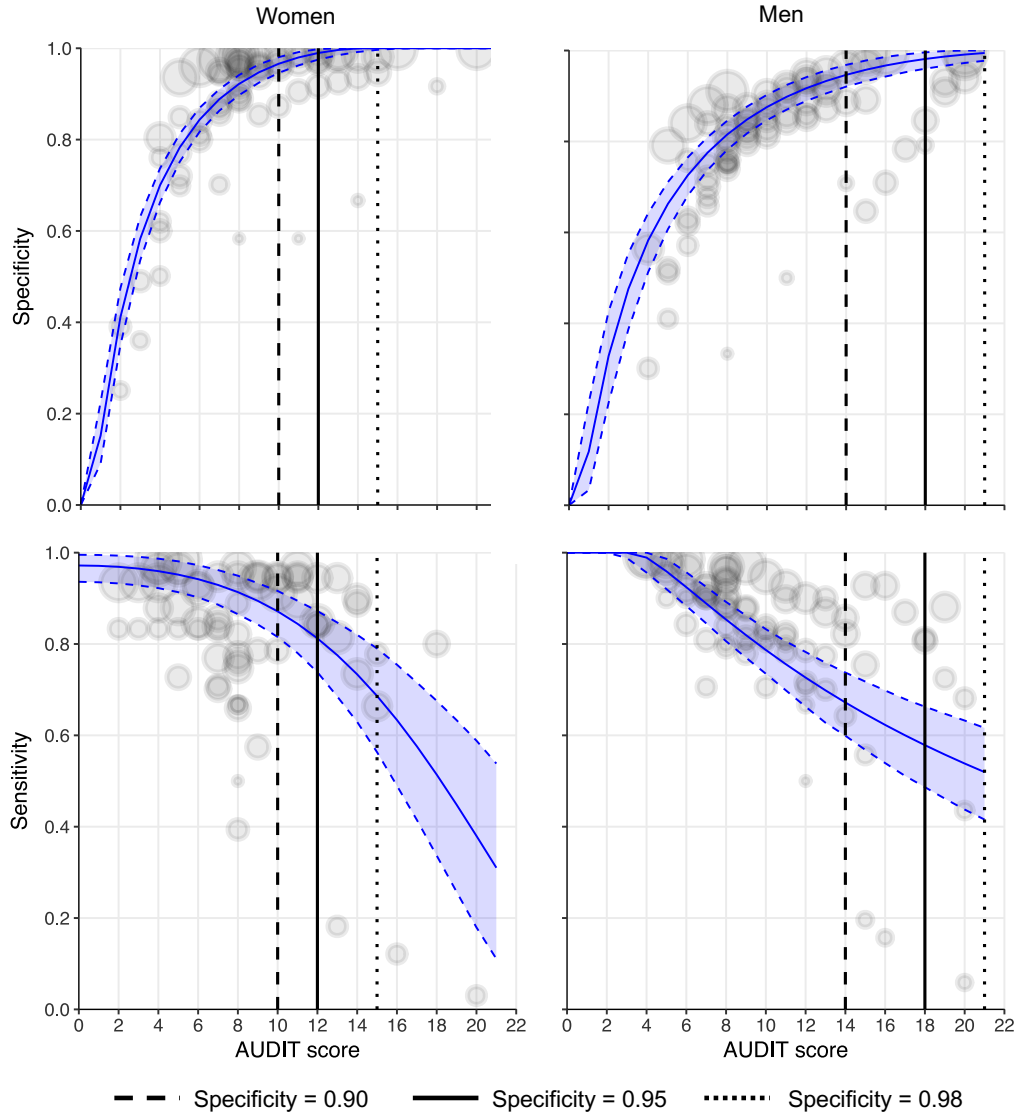

**eFigure 1. Relationship between the AUDIT cut-point and the sensitivity and specificity of the AUDIT in identifying alcohol dependence by sex, assuming a standard drink size of 10 grams**

*Note.* Audit cut-points were rounded to the nearest integer. Specificity = 0.90; women (AUDIT score = 10; sensitivity = 0.901); men (AUDIT score = 14; sensitivity = 0.747). Specificity = 0.95; women (AUDIT score = 12; sensitivity = 0.864); men (AUDIT score = 18; sensitivity = 0.647). Specificity = 0.96; women (AUDIT score = 15; sensitivity = 0.803); men (AUDIT score = 21; sensitivity = 0.576).

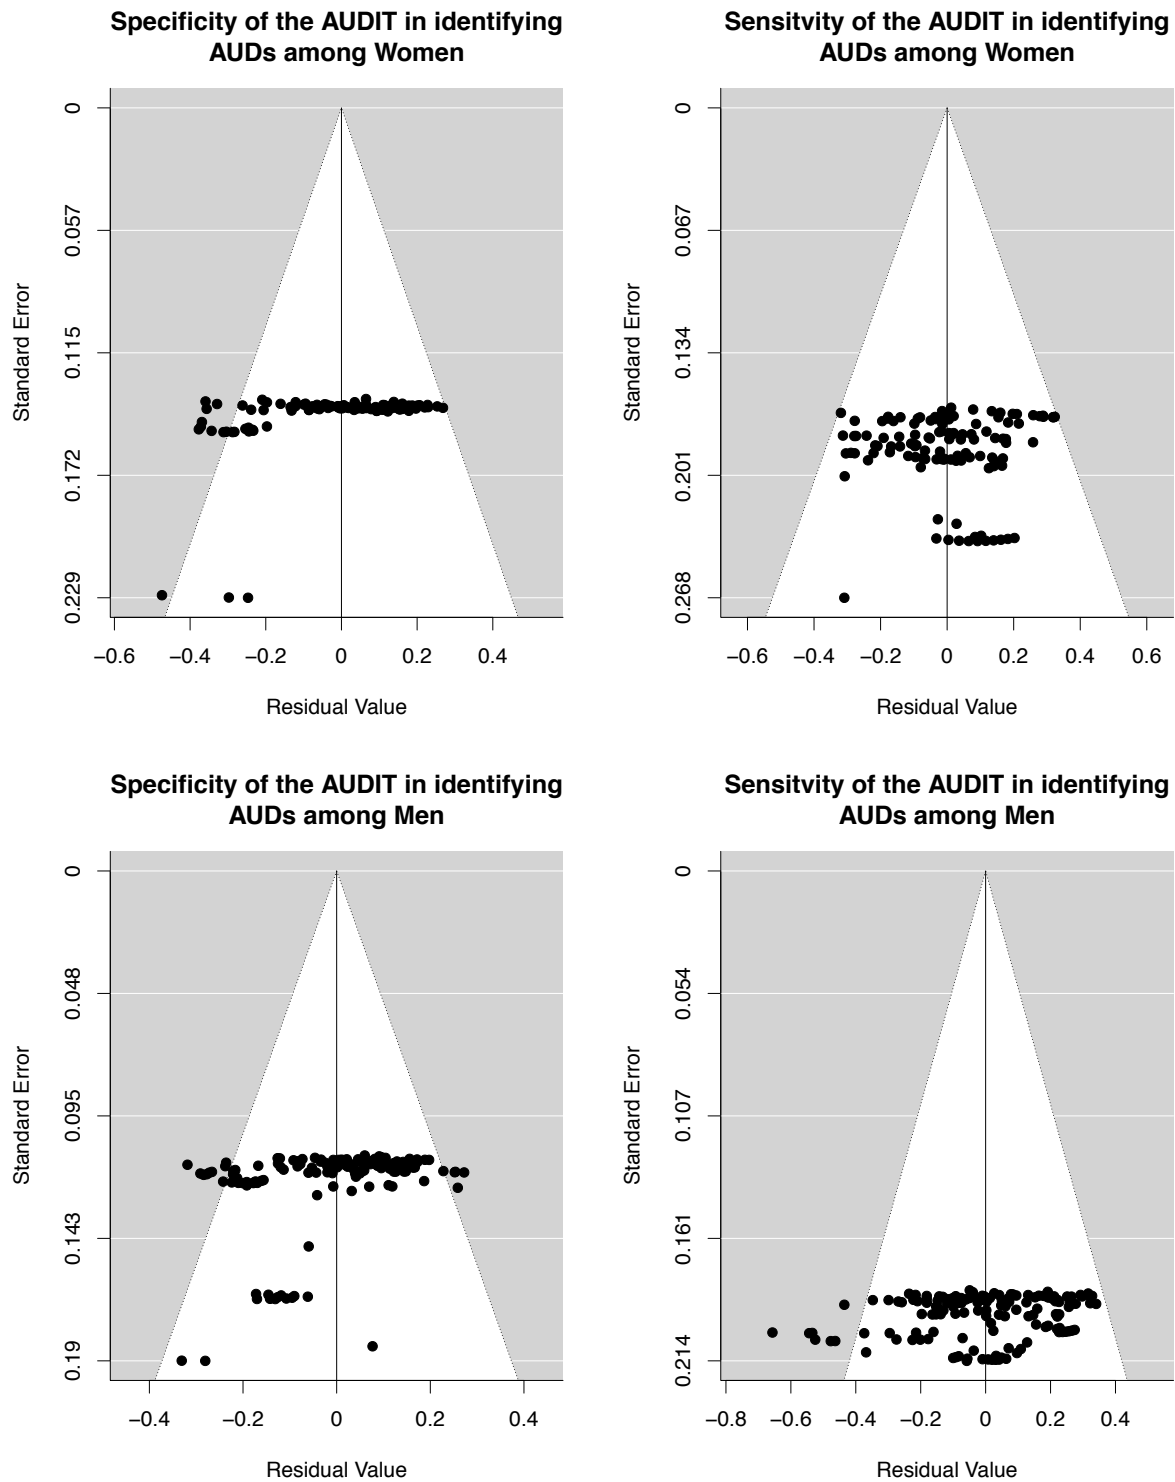

**eFigure 2. Funnel plots for Freeman-Tukey Double arcsine transformed sensitivity and specificity estimates for the AUDIT in identifying alcohol use disorders**  
 AUDIT = Alcohol Use Disorder Identification Test  
 AUDs = Alcohol Use Disorders

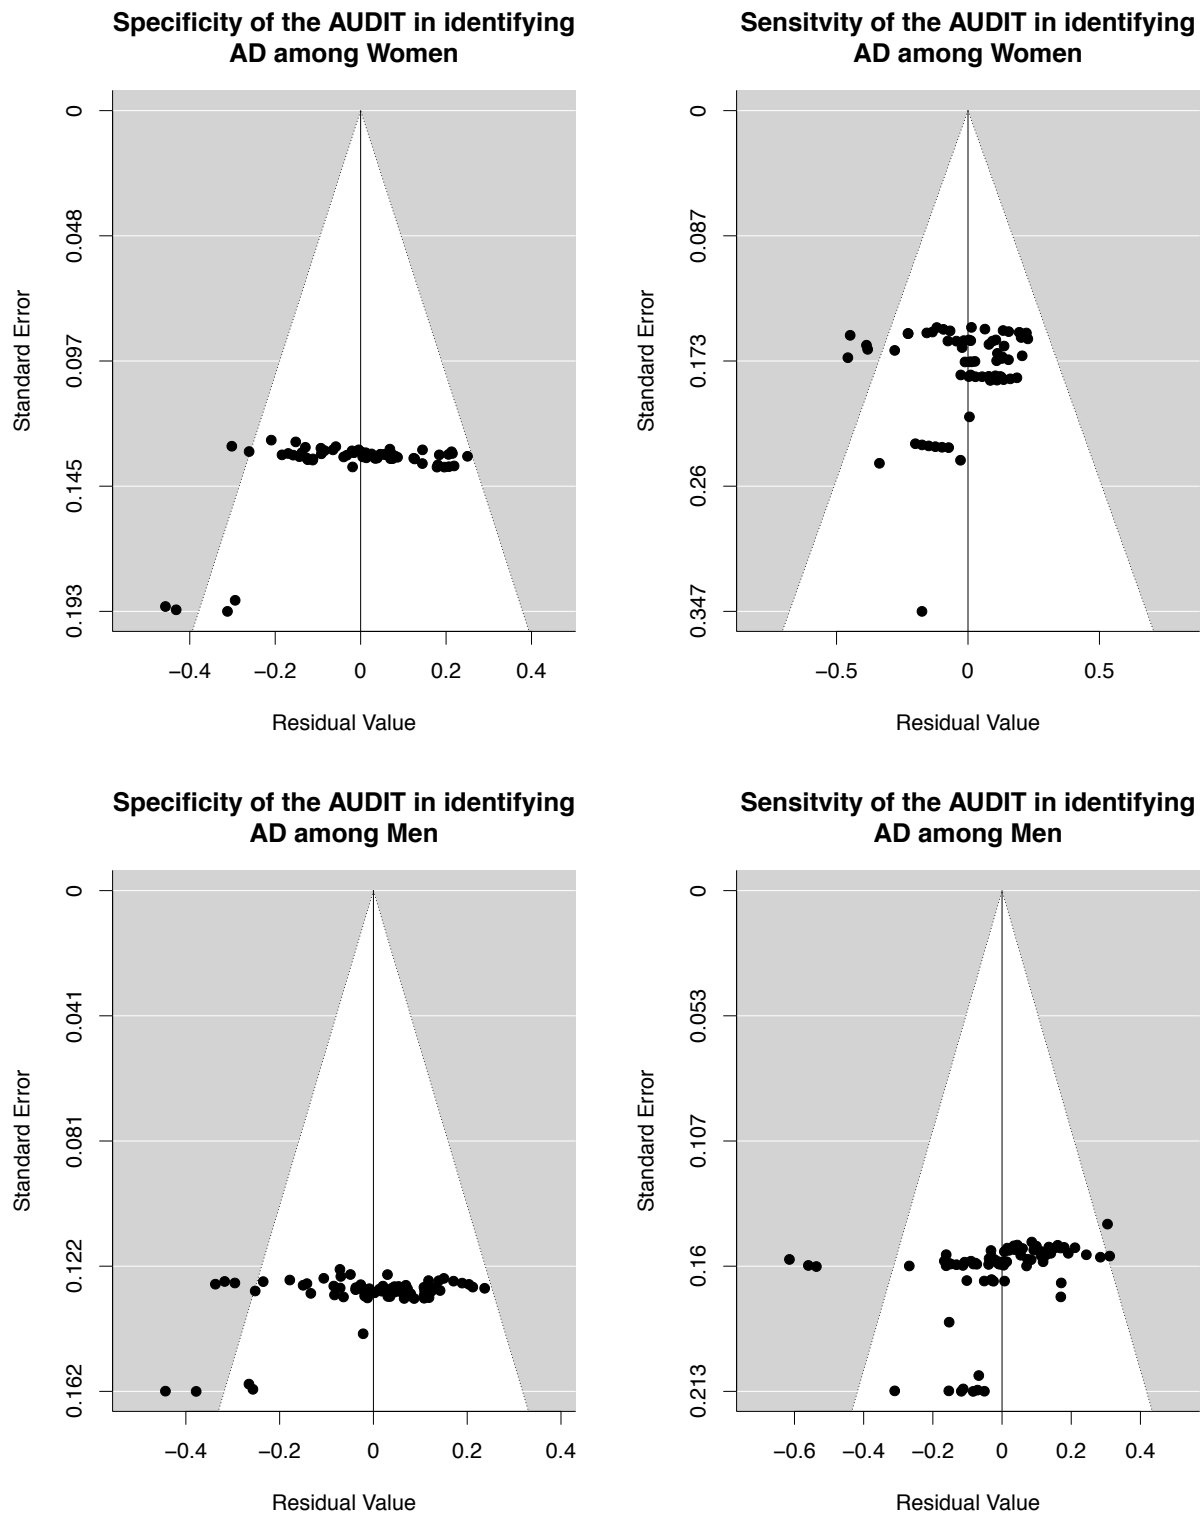

**eFigure 3. Funnel plots for Freeman-Tukey Double arcsine transformed sensitivity and specificity estimates for the AUDIT in identifying alcohol dependence**  
 AUDIT = Alcohol Use Disorder Identification Test  
 AD = Alcohol Dependence

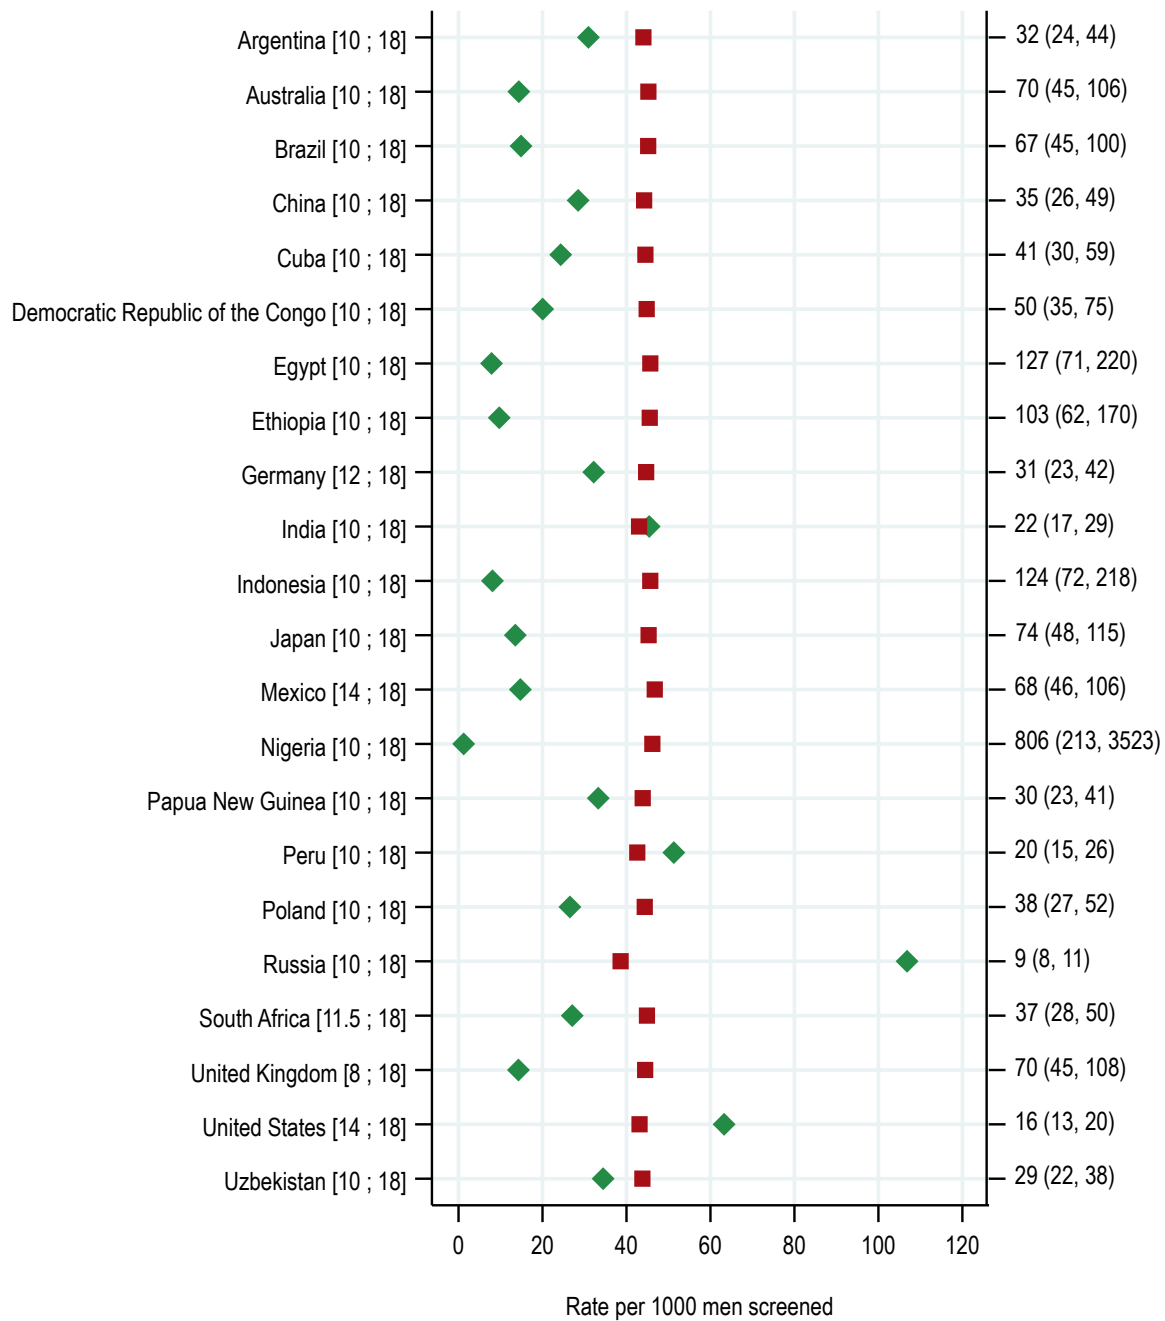

**eFigure 4. Screening statistics by country for alcohol dependence per 1,000 men screened using the AUDIT cut-point that provides a specificity of 0.95**

*Note.* Rates are based on 1,000 men screened, and do not represent strata of men with and without alcohol dependence.



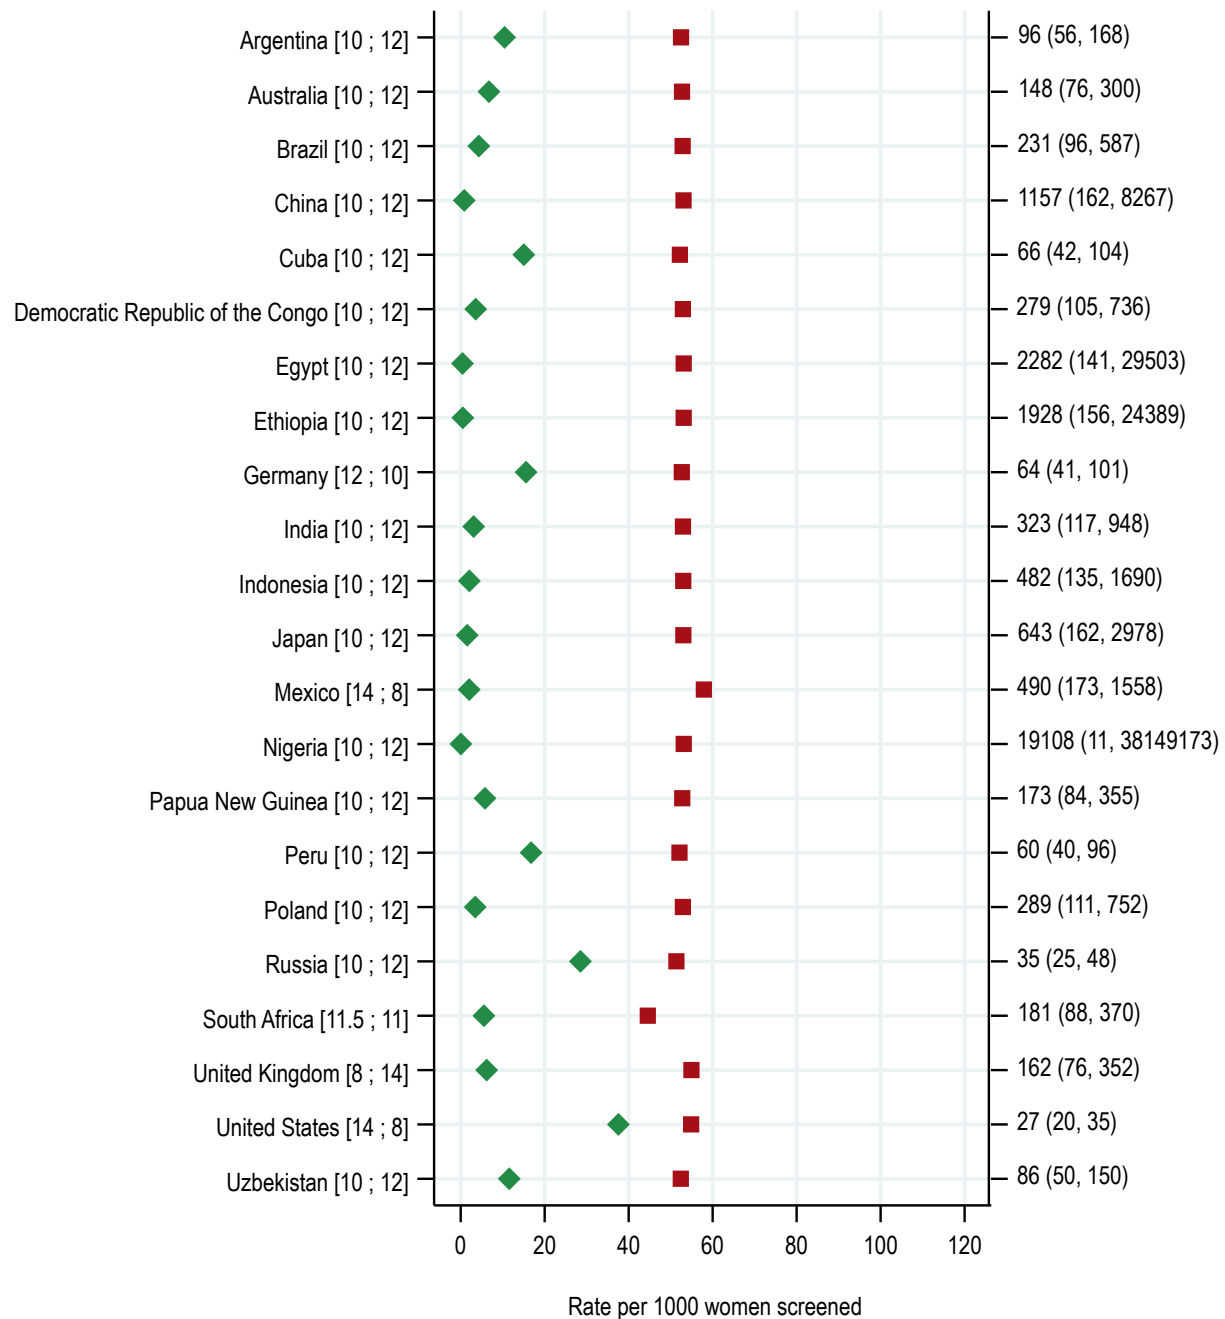

**eFigure 5. Screening statistics by country for alcohol dependence per 1,000 women screened using the AUDIT cut-point that provides a specificity of 0.95**

*Note.* Rates are based on 1,000 women screened, and do not represent strata of women with and without alcohol dependence.

## References

- 1 Aertgeerts B, Buntinx F, Ansoms S, Fevery J. Screening properties of questionnaires and laboratory tests for the detection of alcohol abuse or dependence in a general practice population. *Br J Gen Pract* 2001; **51**(464):206–17.
- 2 Aertgeerts B, Buntinx F, Ansoms S, Fevery J. Questionnaires are better than laboratory tests to screen for current alcohol abuse or dependence in a male inpatient population. *Acta Clinica Belgica* 2002; **57**(5):241–9.
- 3 Bergman H, Källmén H, Rydberg U, Sandahl C. Ten questions about alcohol as identifier of addiction problems. Psychometric tests at an emergency psychiatric department. *Lakartidningen* 1998; **95**(43):4731–5.
- 4 Boschloo L, Vogelzangs N, Smit JH, et al. The performance of the Alcohol Use Disorder Identification Test (AUDIT) in detecting alcohol abuse and dependence in a population of depressed or anxious persons. *J Affect Disord* 2010; **126**(3):441–6.
- 5 Bradley KA, Bush KR, McDonnell MB, Malone T, Fihn SD. Screening for problem drinking: Comparison of CAGE and AUDIT. *J Gen Intern Med* 1998; **13**(6):379–88.
- 6 Bradley KA, Debenedetti AF, Volk RJ, Williams EC, Frank D, Kivlahan DR. AUDIT-C as a brief screen for alcohol misuse in primary care. *Alcohol Clin Exp Res* 2007; **31**(7):1208–17.
- 7 Chang JW, Kim JS, Jung JG, Kim SS, Yoon SJ, Jang HS. Validity of alcohol use disorder identification test-korean revised version for screening alcohol use disorder according to diagnostic and statistical manual of mental disorders, fifth edition criteria. *Korean J Fam Med* 2016; **37**(6):323–8.
- 8 Cherpitel CJ. Analysis of cut points for screening instruments for alcohol problems in the emergency room. *J Stud Alcohol* 1995; **56**(6):695–700.
- 9 Cherpitel CJ. Differences in performance of screening instruments for problem drinking among Blacks, Whites and Hispanics in an emergency room population. *J Stud Alcohol* 1998; **59**(4):420–6.
- 10 Cherpitel CJ, Ye Y, Moskalewicz J, Swiatkiewicz G. Screening for alcohol problems in two emergency service samples in Poland: Comparison of the RAPS4, CAGE and AUDIT. *Drug Alcohol Depend* 2005; **80**(2):201–7.
- 11 Cherpitel CJ, Borges G. Performance of screening instruments for alcohol problems in the ER: a comparison of Mexican-Americans and Mexicans in Mexico. *Am J Drug Alcohol Abuse* 2000; **26**(4):683–702.
- 12 Crawford EF, Fulton JJ, Swinkels CM, Beckham JC, Calhoun PS. Diagnostic efficiency of the AUDIT-C in U.S. veterans with military service since September 11, 2001. *Drug Alcohol Depend* 2013; **132**(1-2):101–6.
- 13 De Silva P, Jayawardana P, Pathmeswaran A. Concurrent validity of the alcohol use disorders identification test (AUDIT). *Alcohol Alcohol* 2008; **43**(1):49–50.
- 14 Dybek I, Bischof G, Grothues J, et al. The reliability and validity of the Alcohol Use Disorders Identification Test (AUDIT) in a German general practice population sample. *J Stud Alcohol* 2006; **67**(3):473–81.
- 15 Foxcroft DR, Smith LA, Thomas H, Howcutt S. Accuracy of alcohol use disorders identification test for detecting problem drinking in 18-35 year-olds in England: Method comparison study. *Alcohol Alcohol* 2015; **50**(2):244–50.

- 16 Gache P, Michaud P, Landry U, et al. The alcohol use disorders identification test (AUDIT) as a screening tool for excessive drinking in primary care: Reliability and validity of a french version. *Alcohol Clin Exp Res* 2005; **29**(11):2001–7.
- 17 Gates T, Duffy K, Moore J, Howell W, McDonald W. Alcohol screening instruments and psychiatric evaluation outcomes in military aviation personnel. *Aviat Space Environ Med* 2007; **78**(1):48–51.
- 18 Geneste J, Pereira B, Arnaud B, et al. CAGE, RAPS4, RAPS4-QF and AUDIT screening tests for men and women admitted for acute alcohol intoxication to an emergency department: Are standard thresholds appropriate? *Alcohol Alcohol* 2012; **47**(3):273–81.
- 19 Gül S, Akvardar Y, Taş G, Tuncel P. The diagnostic validity of screening tests and laboratory markers in alcohol use disorders. *Turk Psikiyatri Dergisi* 2005; **16**(1):3–12
- 20 Kim JW, Lee BC, Lee DY, et al. The 5-item alcohol use disorders identification test (AUDIT-5): An effective brief screening test for problem drinking, alcohol use disorders and alcohol dependence. *Alcohol Alcohol* 2013; **48**(1):68–73.
- 21 Kim CG, Kim JS, Jung JG, Kim SS, Yoon SJ, Suh HS. Reliability and Validity of Alcohol Use Disorder identification Test-Korean Revised Version for Screening At-risk Drinking and Alcohol Use Disorders. *Korean J Fam Med* 2014; **35**(1):2–10.
- 22 Lundin A, Hallgren M, Balliu N, Forsell Y. The Use of Alcohol Use Disorders Identification Test (AUDIT) in Detecting Alcohol Use Disorder and Risk Drinking in the General Population: Validation of AUDIT Using Schedules for Clinical Assessment in Neuropsychiatry. *Alcohol Clin Exp Res* 2015; **39**(1):158–65.
- 23 Morton JL, Jones TV, Manganaro MA. Performance of alcoholism screening questionnaires in elderly veterans. *Am J Med* 1996; **101**(2):153–9.
- 24 Nesvåg R, Lange EH, Færden A, et al. The use of screening instruments for detecting alcohol and other drug use disorders in first-episode psychosis. *Psychiatry Res* 2010; **177**(1-2):228–34.
- 25 Pradhan B, Chappuis F, Baral D, et al. The alcohol use disorders identification test (AUDIT): validation of a Nepali version for the detection of alcohol use disorders and hazardous drinking in medical settings. *Subst Abuse Treat Prev Policy* 2012;**7**:42.
- 26 Ryou YI, Kim JS, Jung JG, Kim SS, Choi DH. Usefulness of alcohol-screening instruments in detecting problem drinking among elderly male drinkers. *Korean J Fam Med* 2012; **33**(3):126–33.
- 27 Steinbauer JR, Cantor SB, Holzer CE, 3rd, Volk RJ. Ethnic and sex bias in primary care screening tests for alcohol use disorders. *Ann Intern Med* 1998;**129**(5):353–62.
- 28 Contel Guillamon M, Gual Sole A, Colom Farran J. Alcohol use disorders identification test (AUDIT): Translation and validation of Catalan and Spanish. *Adicciones*. 1999; **11**(4):337–47.
- 29 Coulton S, Drummond C, James D, et al. Opportunistic screening for alcohol use disorders in primary care: comparative study. *BMJ* 2006; **332**(7540):511–7.
- 30 Endsley P, Weobong B, Nadkarni A. Psychometric properties of the AUDIT among men in Goa, India. *Asian J Psychiatr* 2017; **29**:54–8.
- 31 Johnson JA, Lee A, Vinson D, Seale JP. Use of AUDIT-Based Measures to Identify Unhealthy Alcohol Use and Alcohol Dependence in Primary Care: A Validation Study. *Alcohol Clin Exp Res* 2013; **37**(Suppl. 1):E253–9.
- 32 Li B, Sheng Y, Zhange B, al. e. The test of AUDIT in China. *Chin Ment Health J* 2003;**17**:1–3.

- 33 Meneses-Gaya C, Zuardi AW, Loureiro SR, et al. Is the full version of the AUDIT really necessary? study of the validity and internal construct of its abbreviated versions. *Alcohol Clin Exp Res* 2010; **34**(8):1417–24.
- 34 Bush KR, Kivlahan DR, Davis TM, et al. The TWEAK is Weak for Alcohol Screening among Female Veterans Affairs Outpatients. *Alcohol Clin Exp Res* 2003; **27**(12):1971–8.
- 35 Cremonte M, Cherpitel CJ. Performance of screening instruments for alcohol use disorders in emergency department patients in Argentina. *Subst Use Misuse* 2008; **43**(1):125–38.
- 36 de Torres LA, Rebollo EM, Ruiz-Moral R, Fernandez-Garcia JA, Vega RA, Palomino MM. Diagnostic usefulness of the Alcohol Use Disorders Identification Test (AUDIT) questionnaire for the detection of hazardous drinking and dependence on alcohol among Spanish patients. *Eur J Gen Pract* 2009; **15**(1):15–21.
